# Supplementary material
Source: PubMed Central journal article supplement (PMC3191307)
Supplement: NIHMS311160-supplement-1.pdf [file NIHMS311160-supplement-1.pdf]

**Supplemental Dataset 1.** Boxplots illustrating variance in growth inhibition across the entire CEPH population (n = 142) for each compound. Line represents mean phenotypic response, whiskers box represents upper and lower quartiles, and whiskers are 1.5\*IQR. Outliers (circles) are individuals whose mean viability is greater than 1.5\*IQR. Drug abbreviations are as follows: Indenoisoquinoline 1 = 84A1, Indenoisoquinoline 2 = 85A1, and Indenoisoquinoline 3 = 86A1.

# Drug 84A1

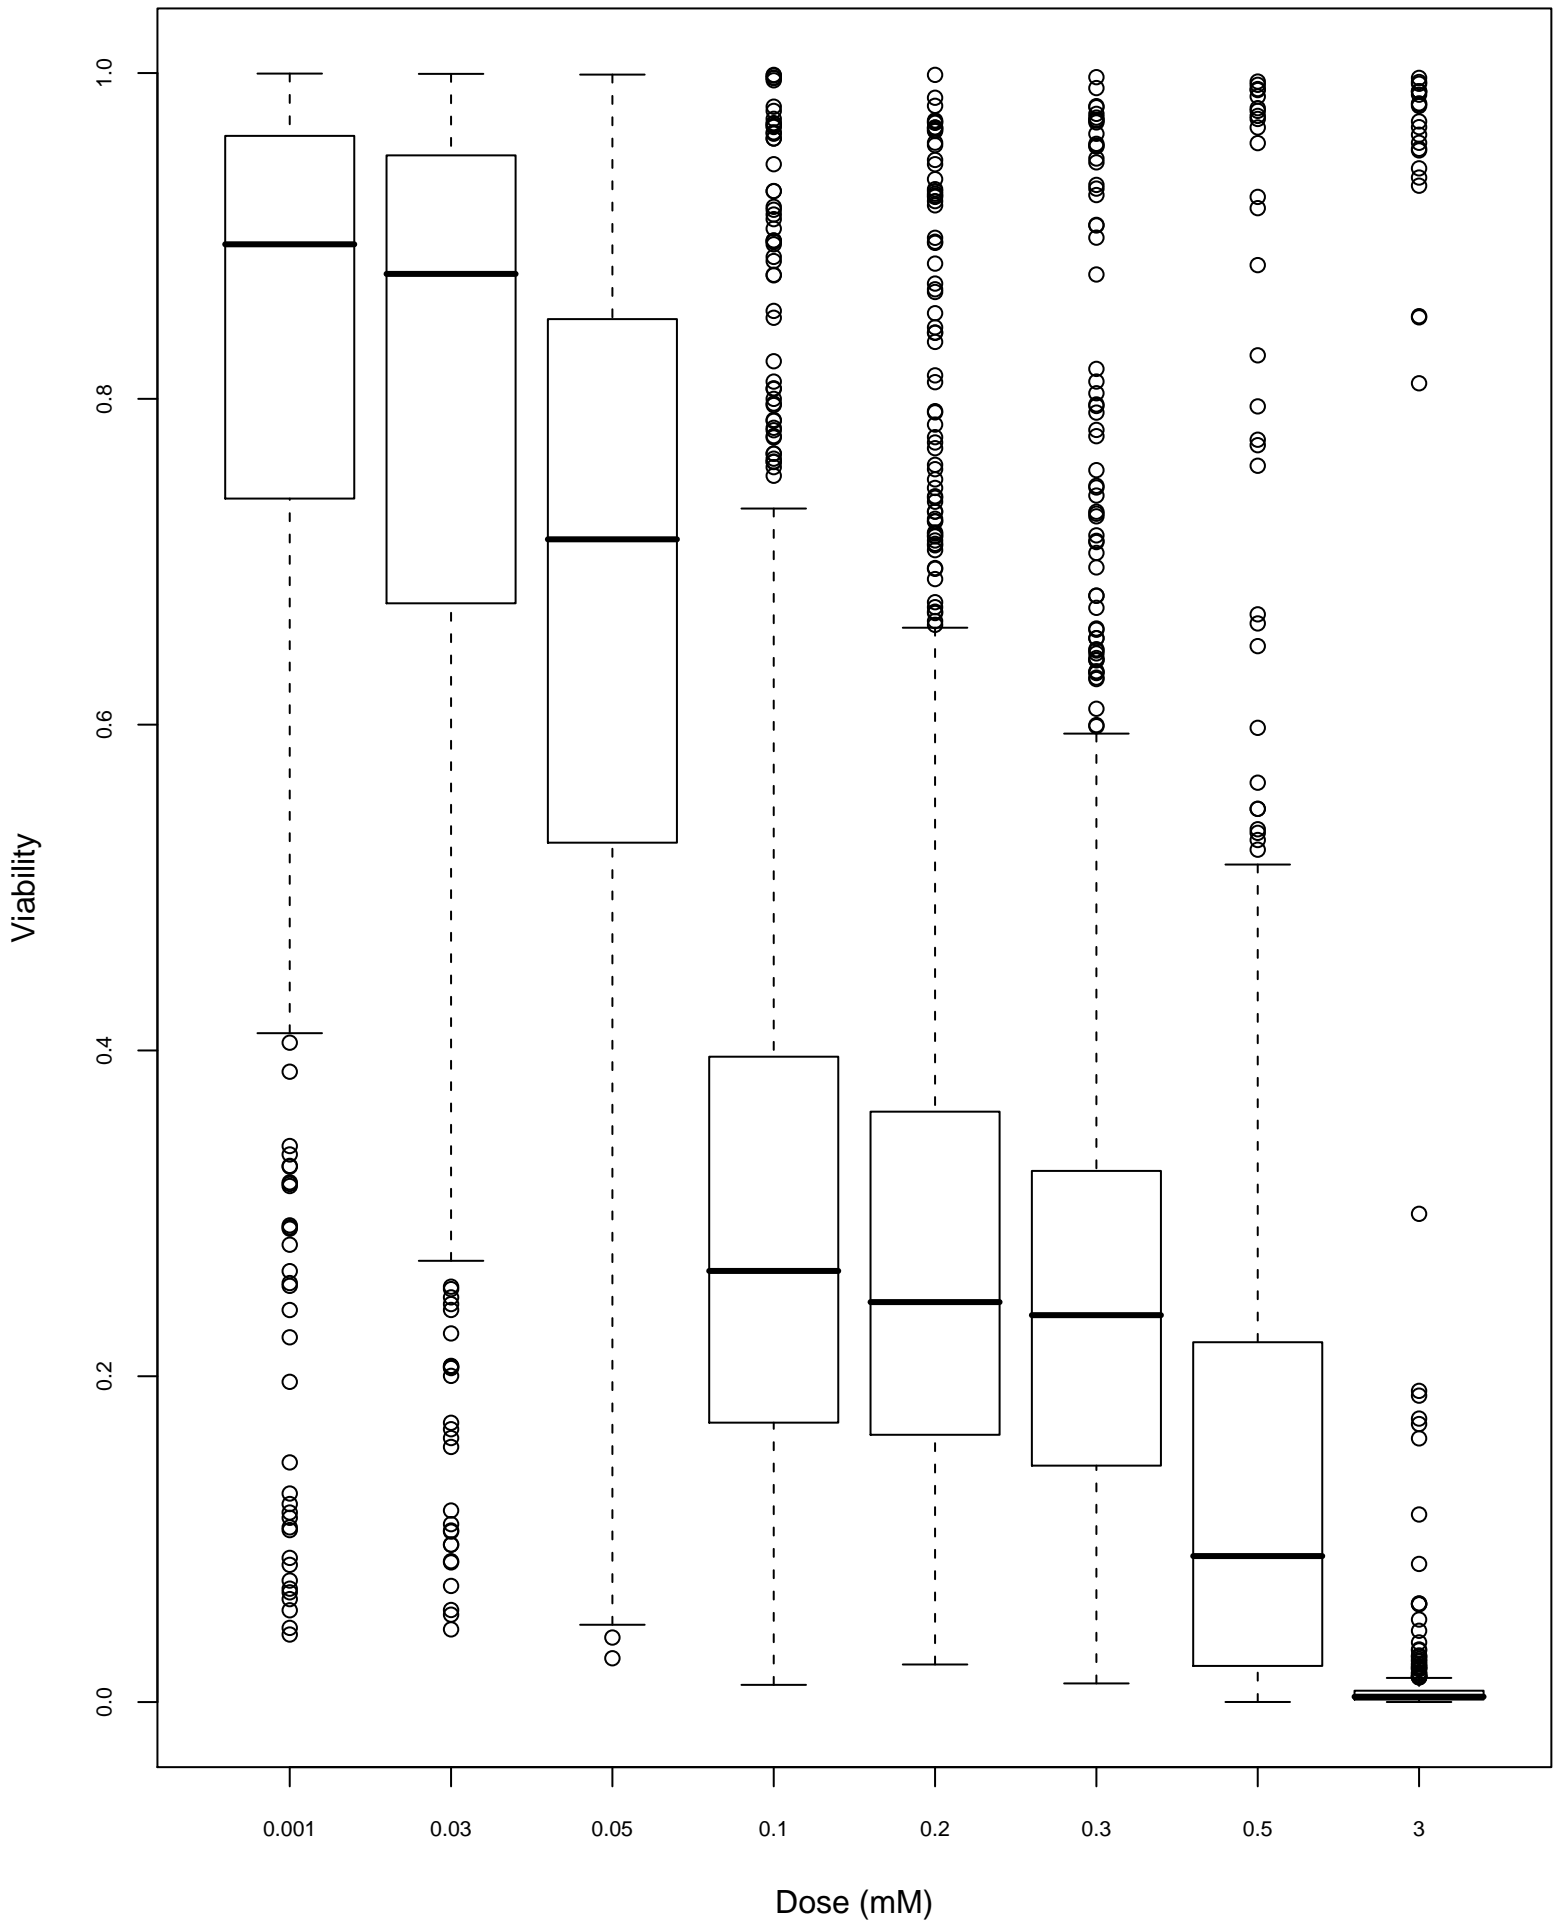

# Drug 85A1

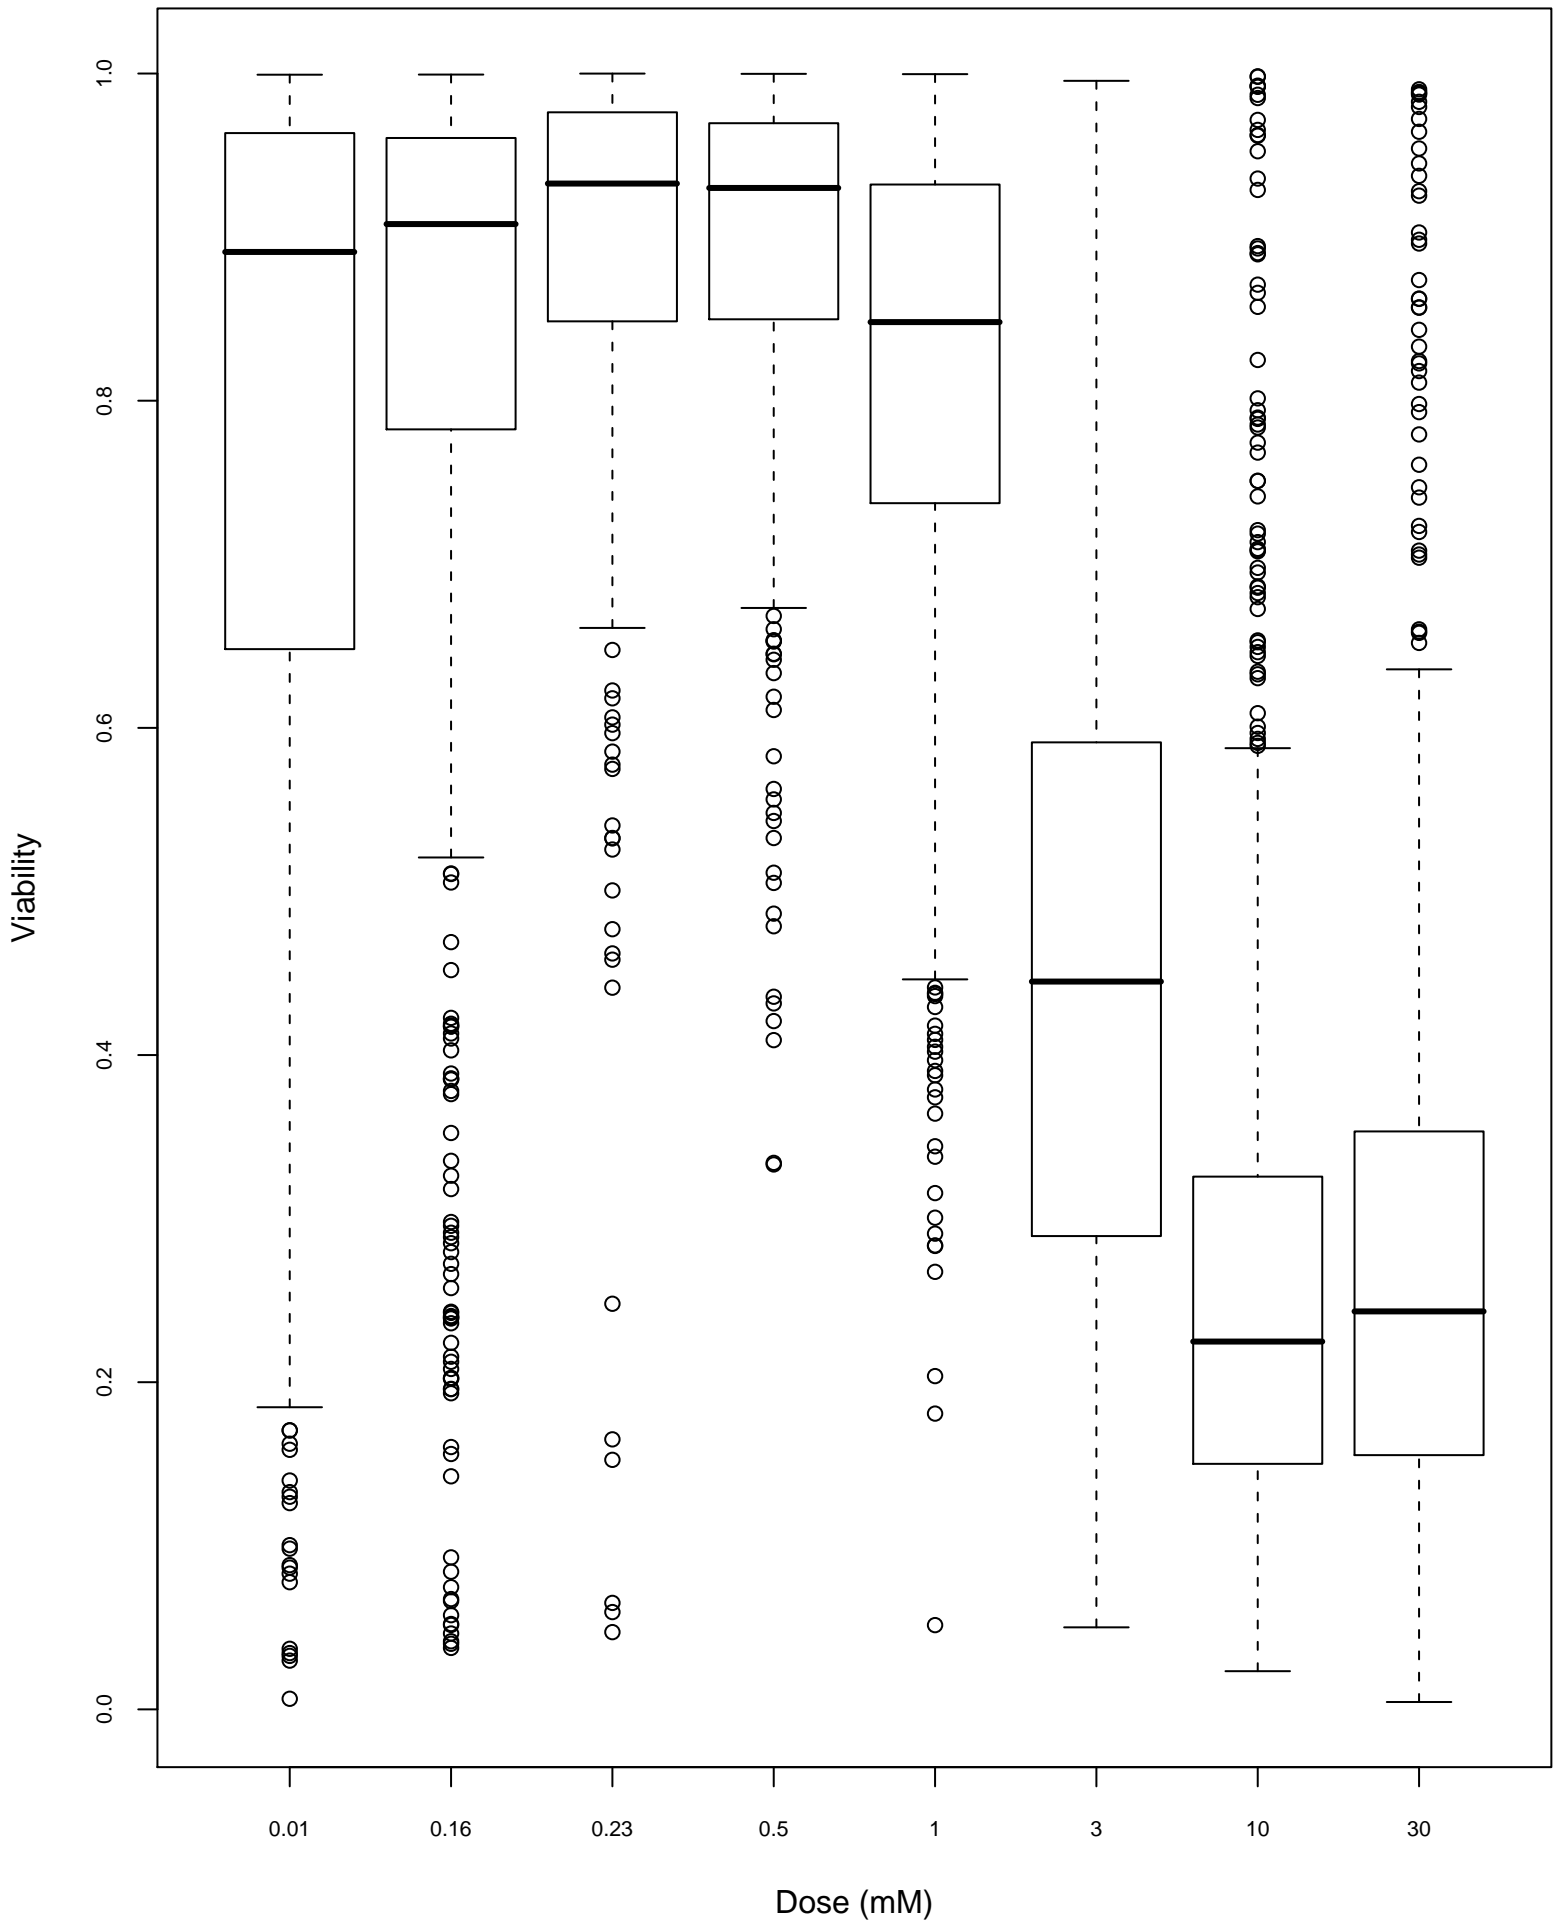

# Drug 86A1

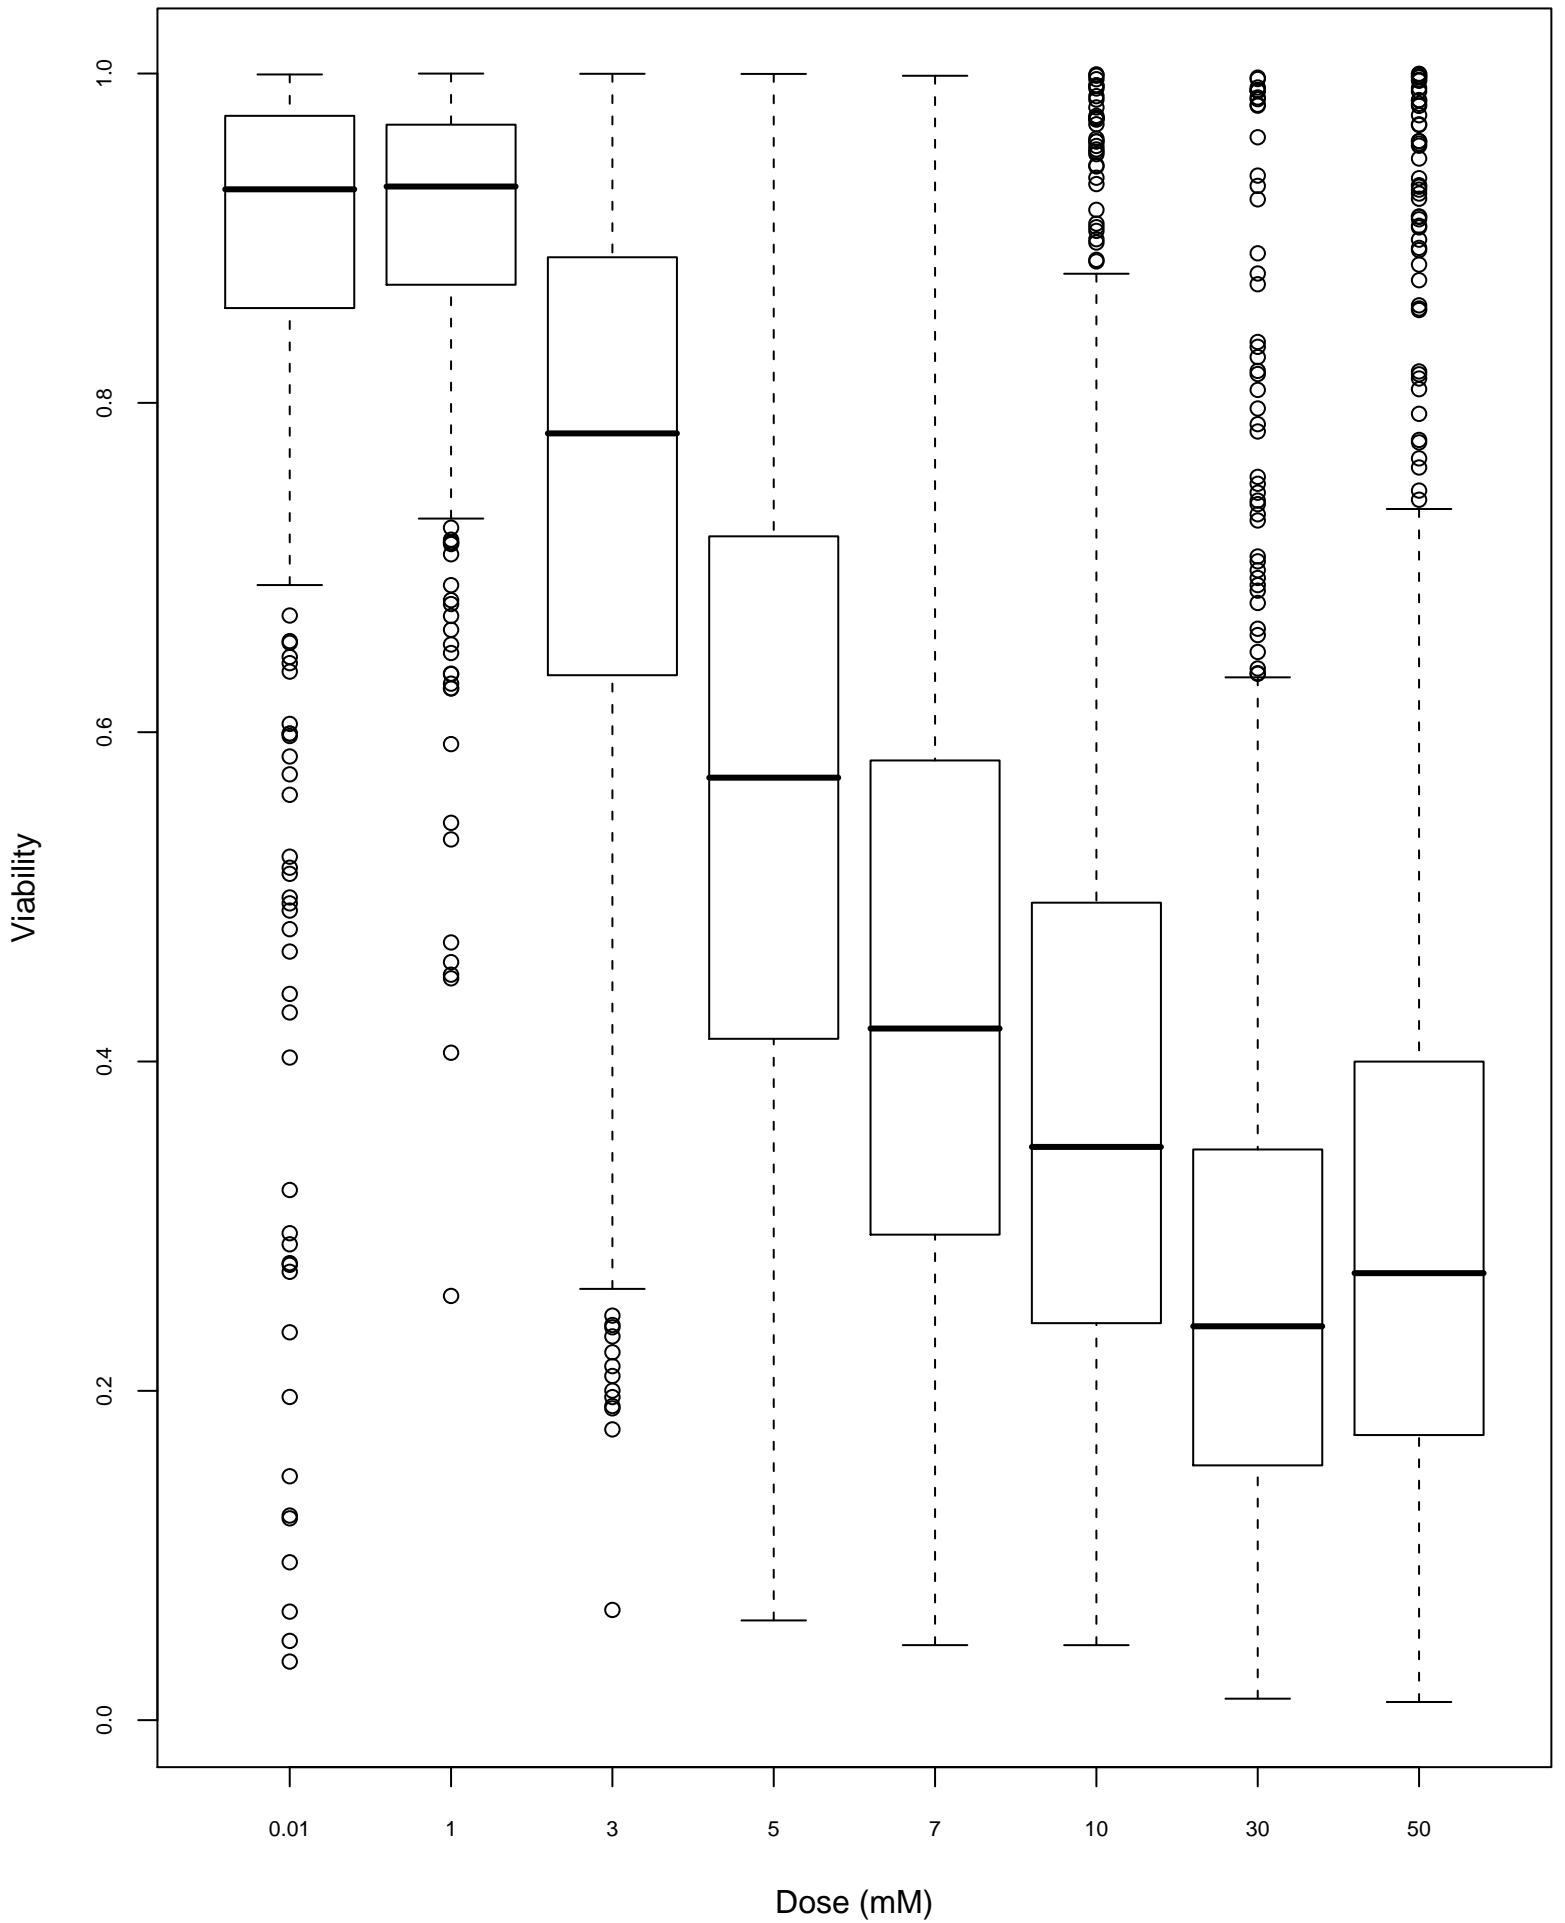

**Supplemental Dataset 2.** Boxplots illustrating intra- and inter-family variance in growth inhibition for each compound and concentration across CEPH families. Line represents mean phenotypic response, whiskers box represents upper and lower quartiles, and whiskers are  $1.5 \times \text{IQR}$ . Outliers (circles) are individuals whose mean viability is greater than  $1.5 \times \text{IQR}$ . Drug abbreviations are as follows: Indenoisoquinoline 1 = 84A1, Indenoisoquinoline 2 = 85A1, and Indenoisoquinoline 3 = 86A1.

# Drug 84A1, dose 3.0 (mM)

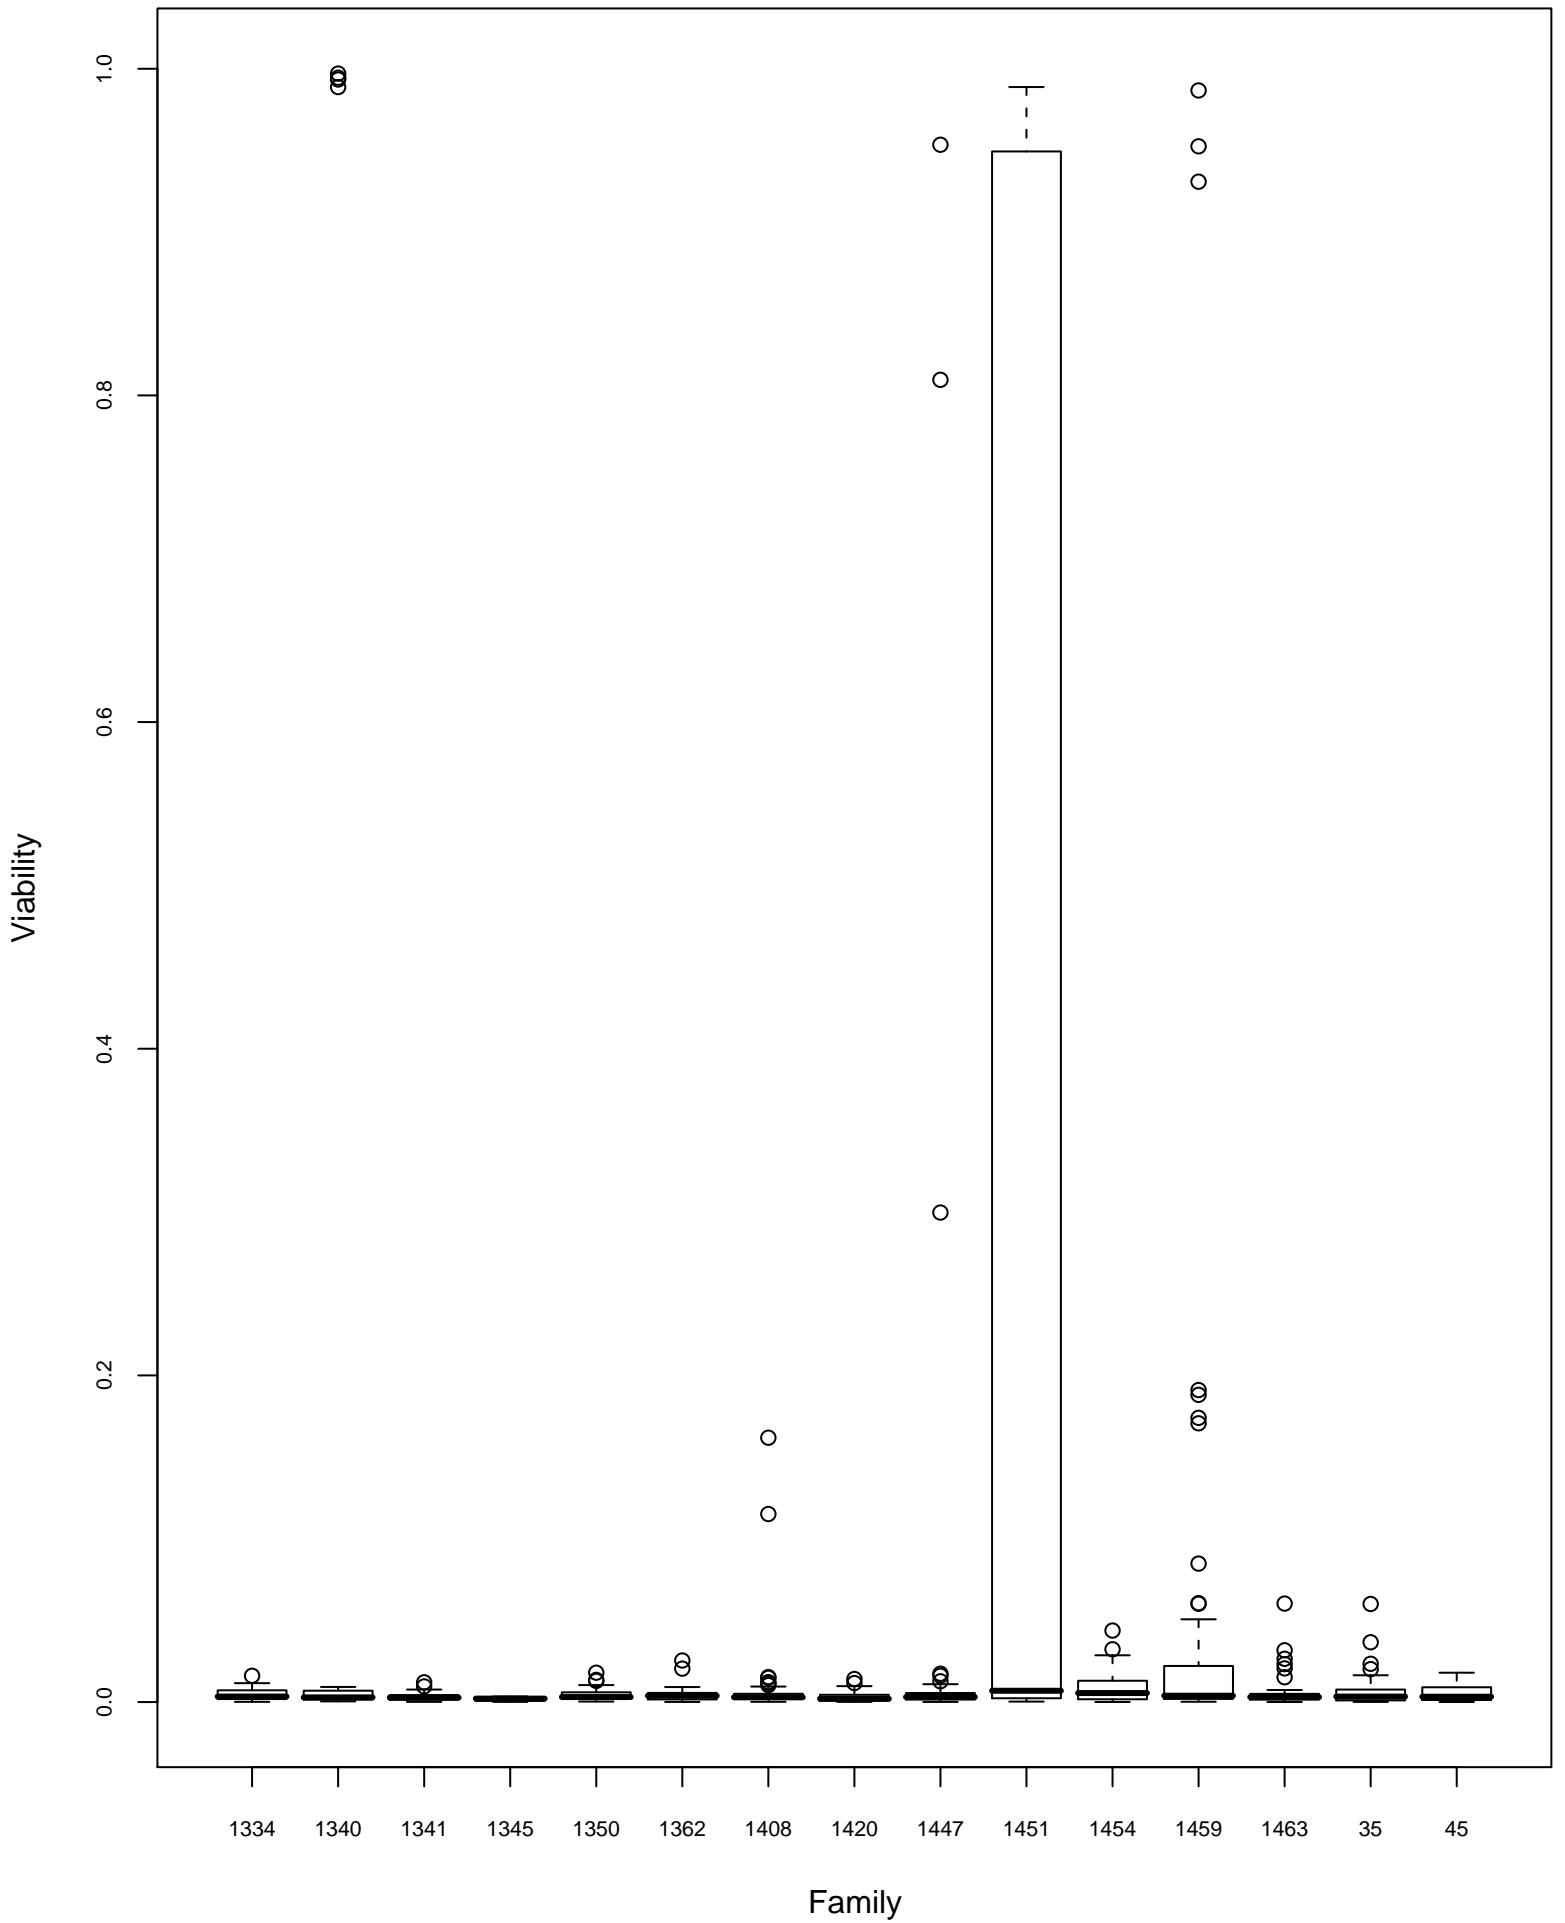

# Drug 84A1, dose 0.5 (mM)

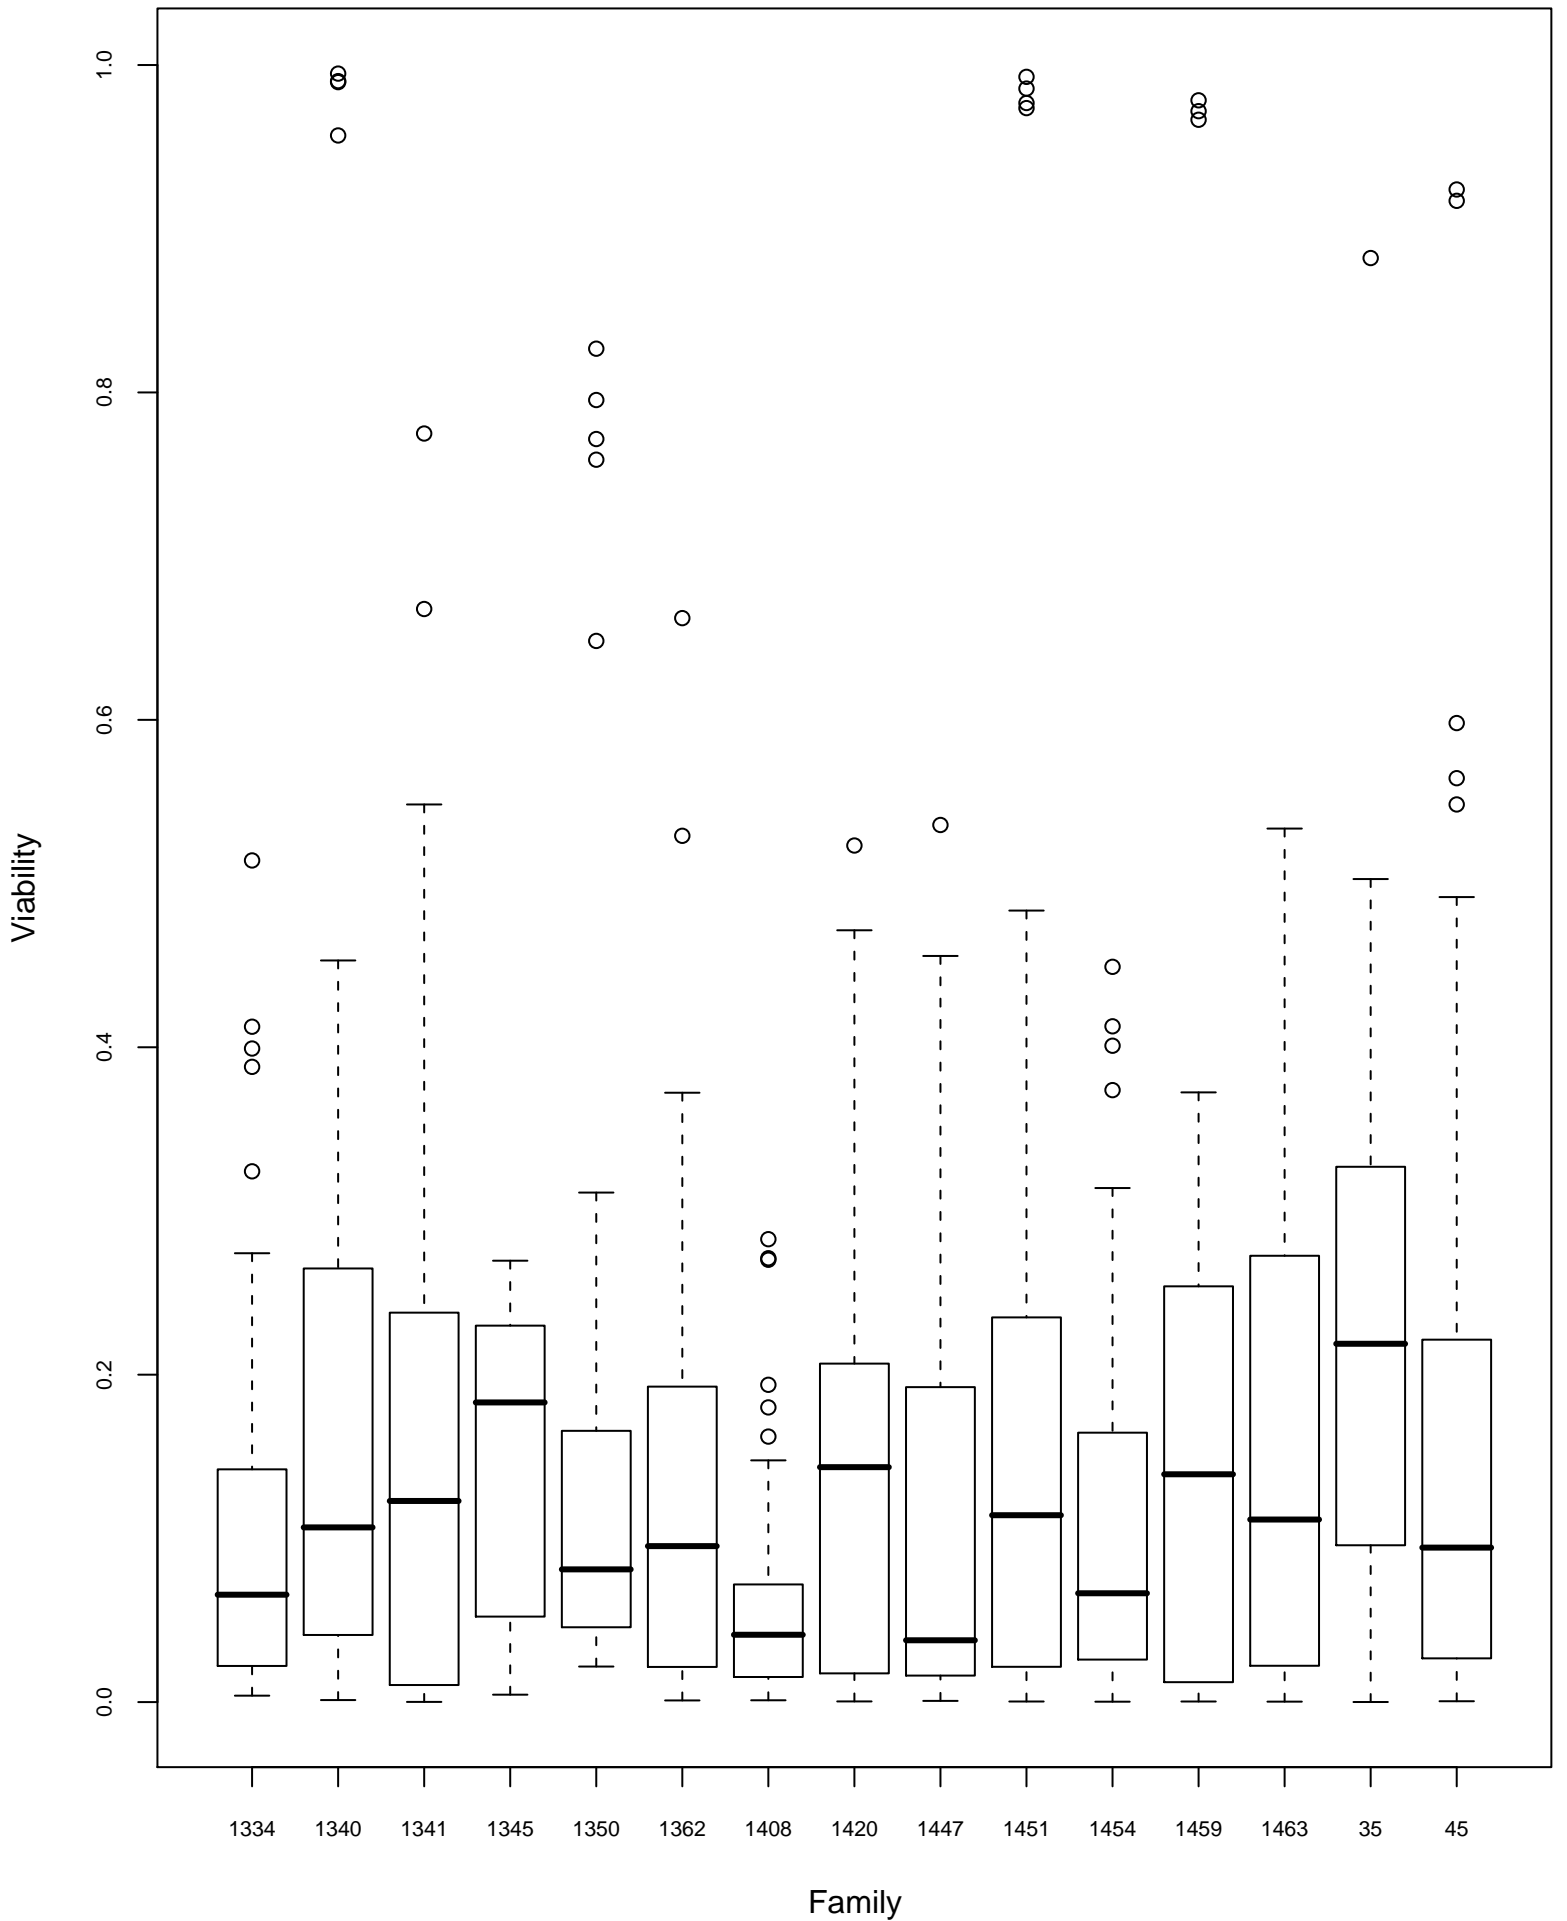

# Drug 84A1, dose 0.3 (mM)

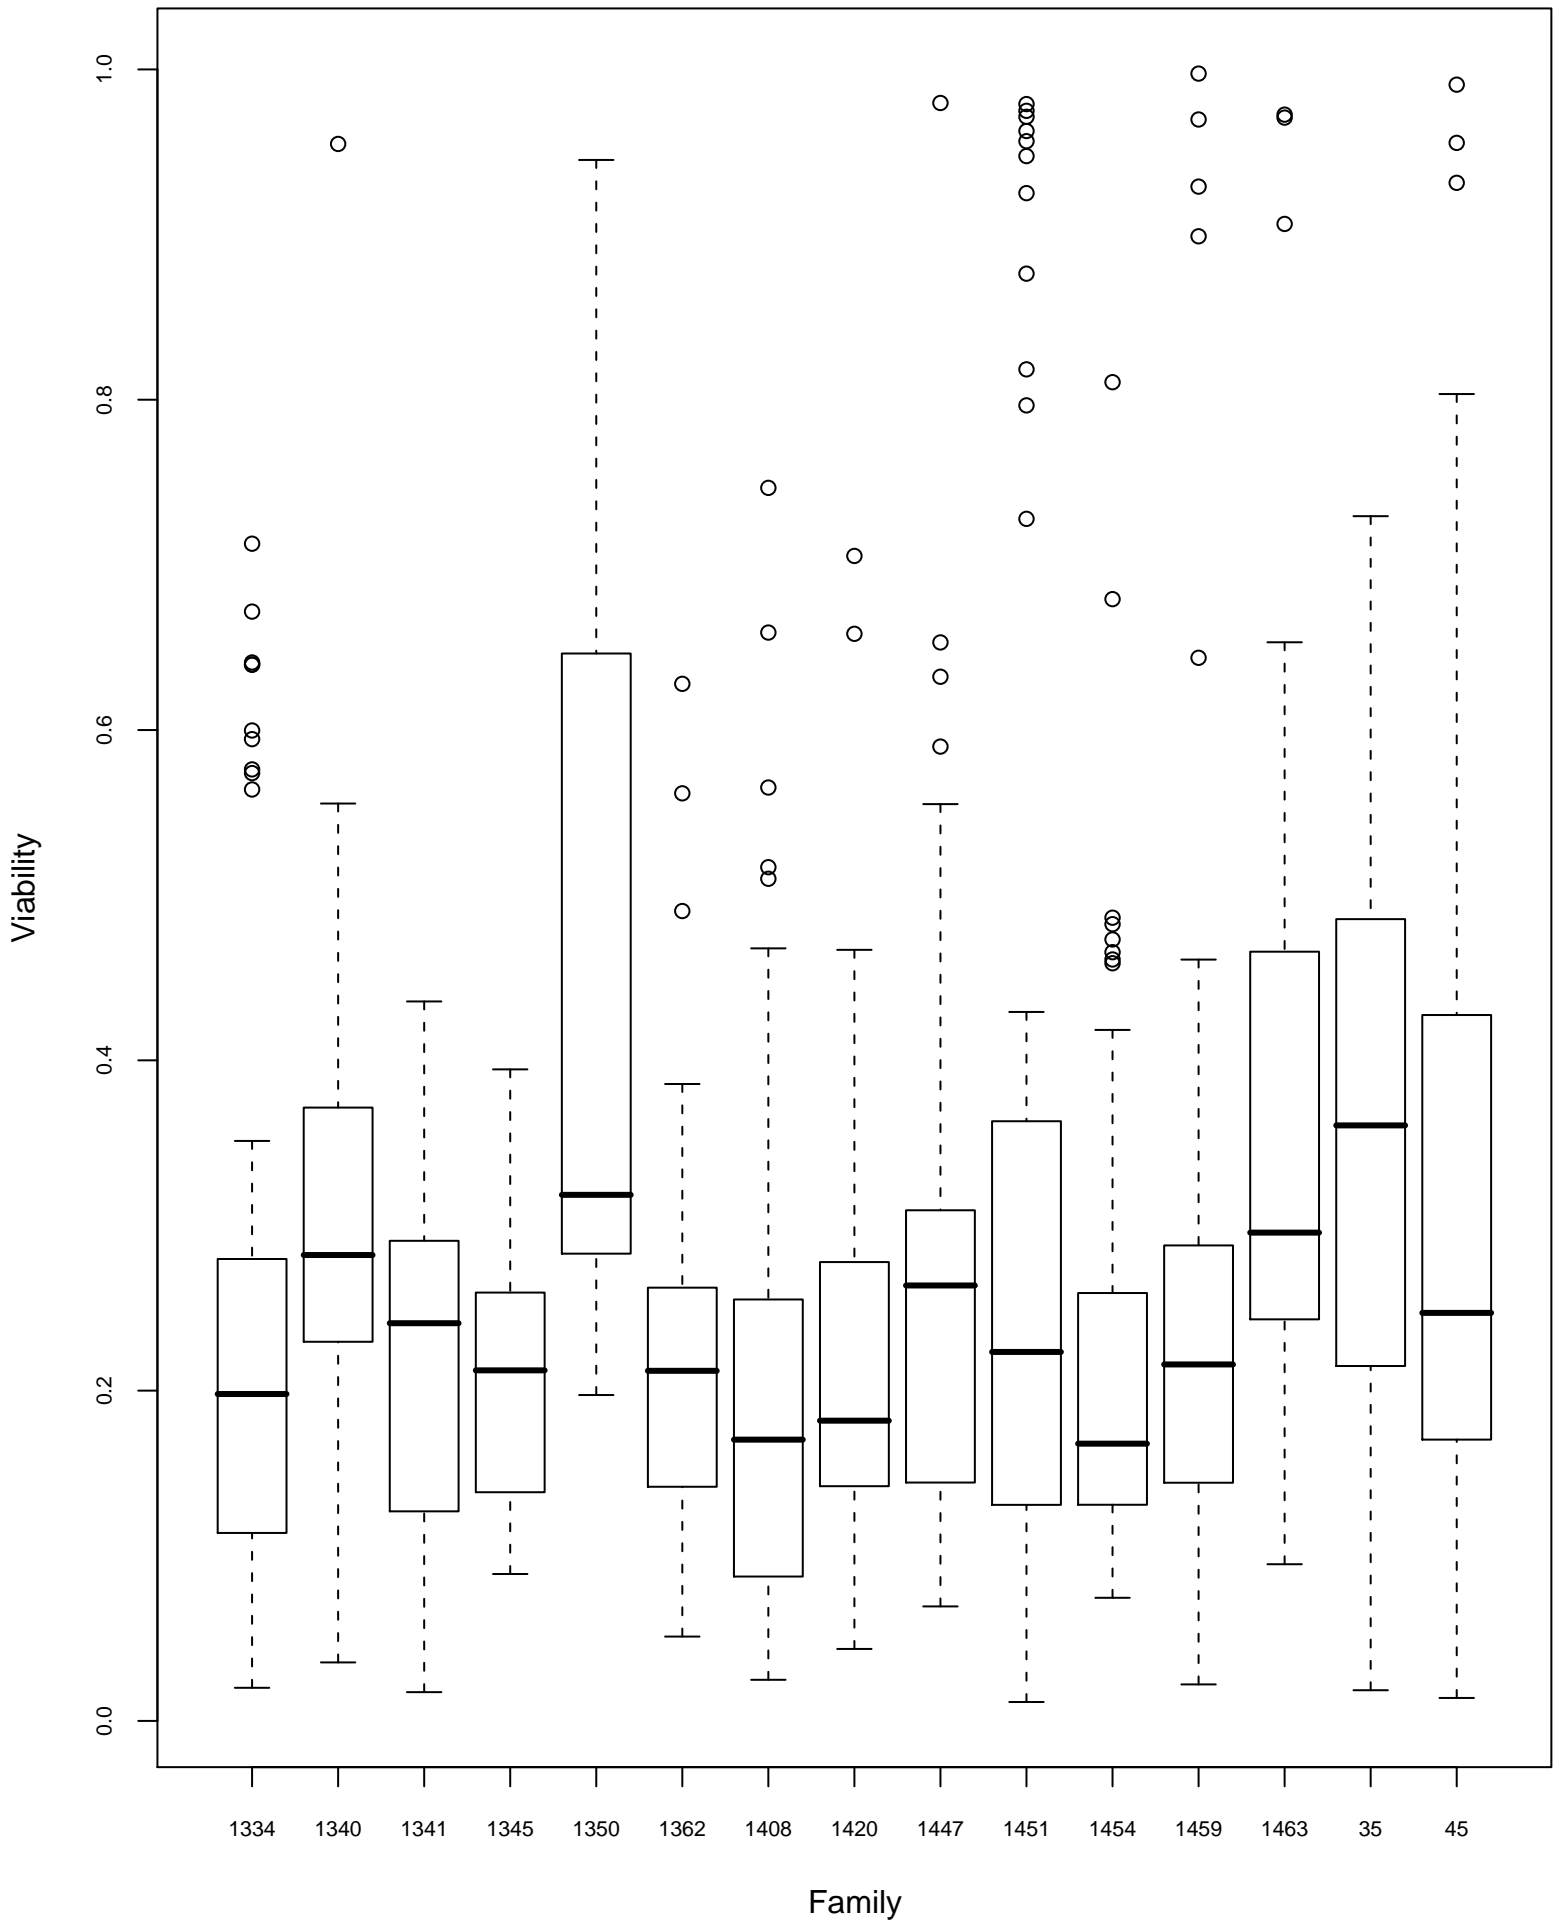



# Drug 84A1, dose 0.2 (mM)

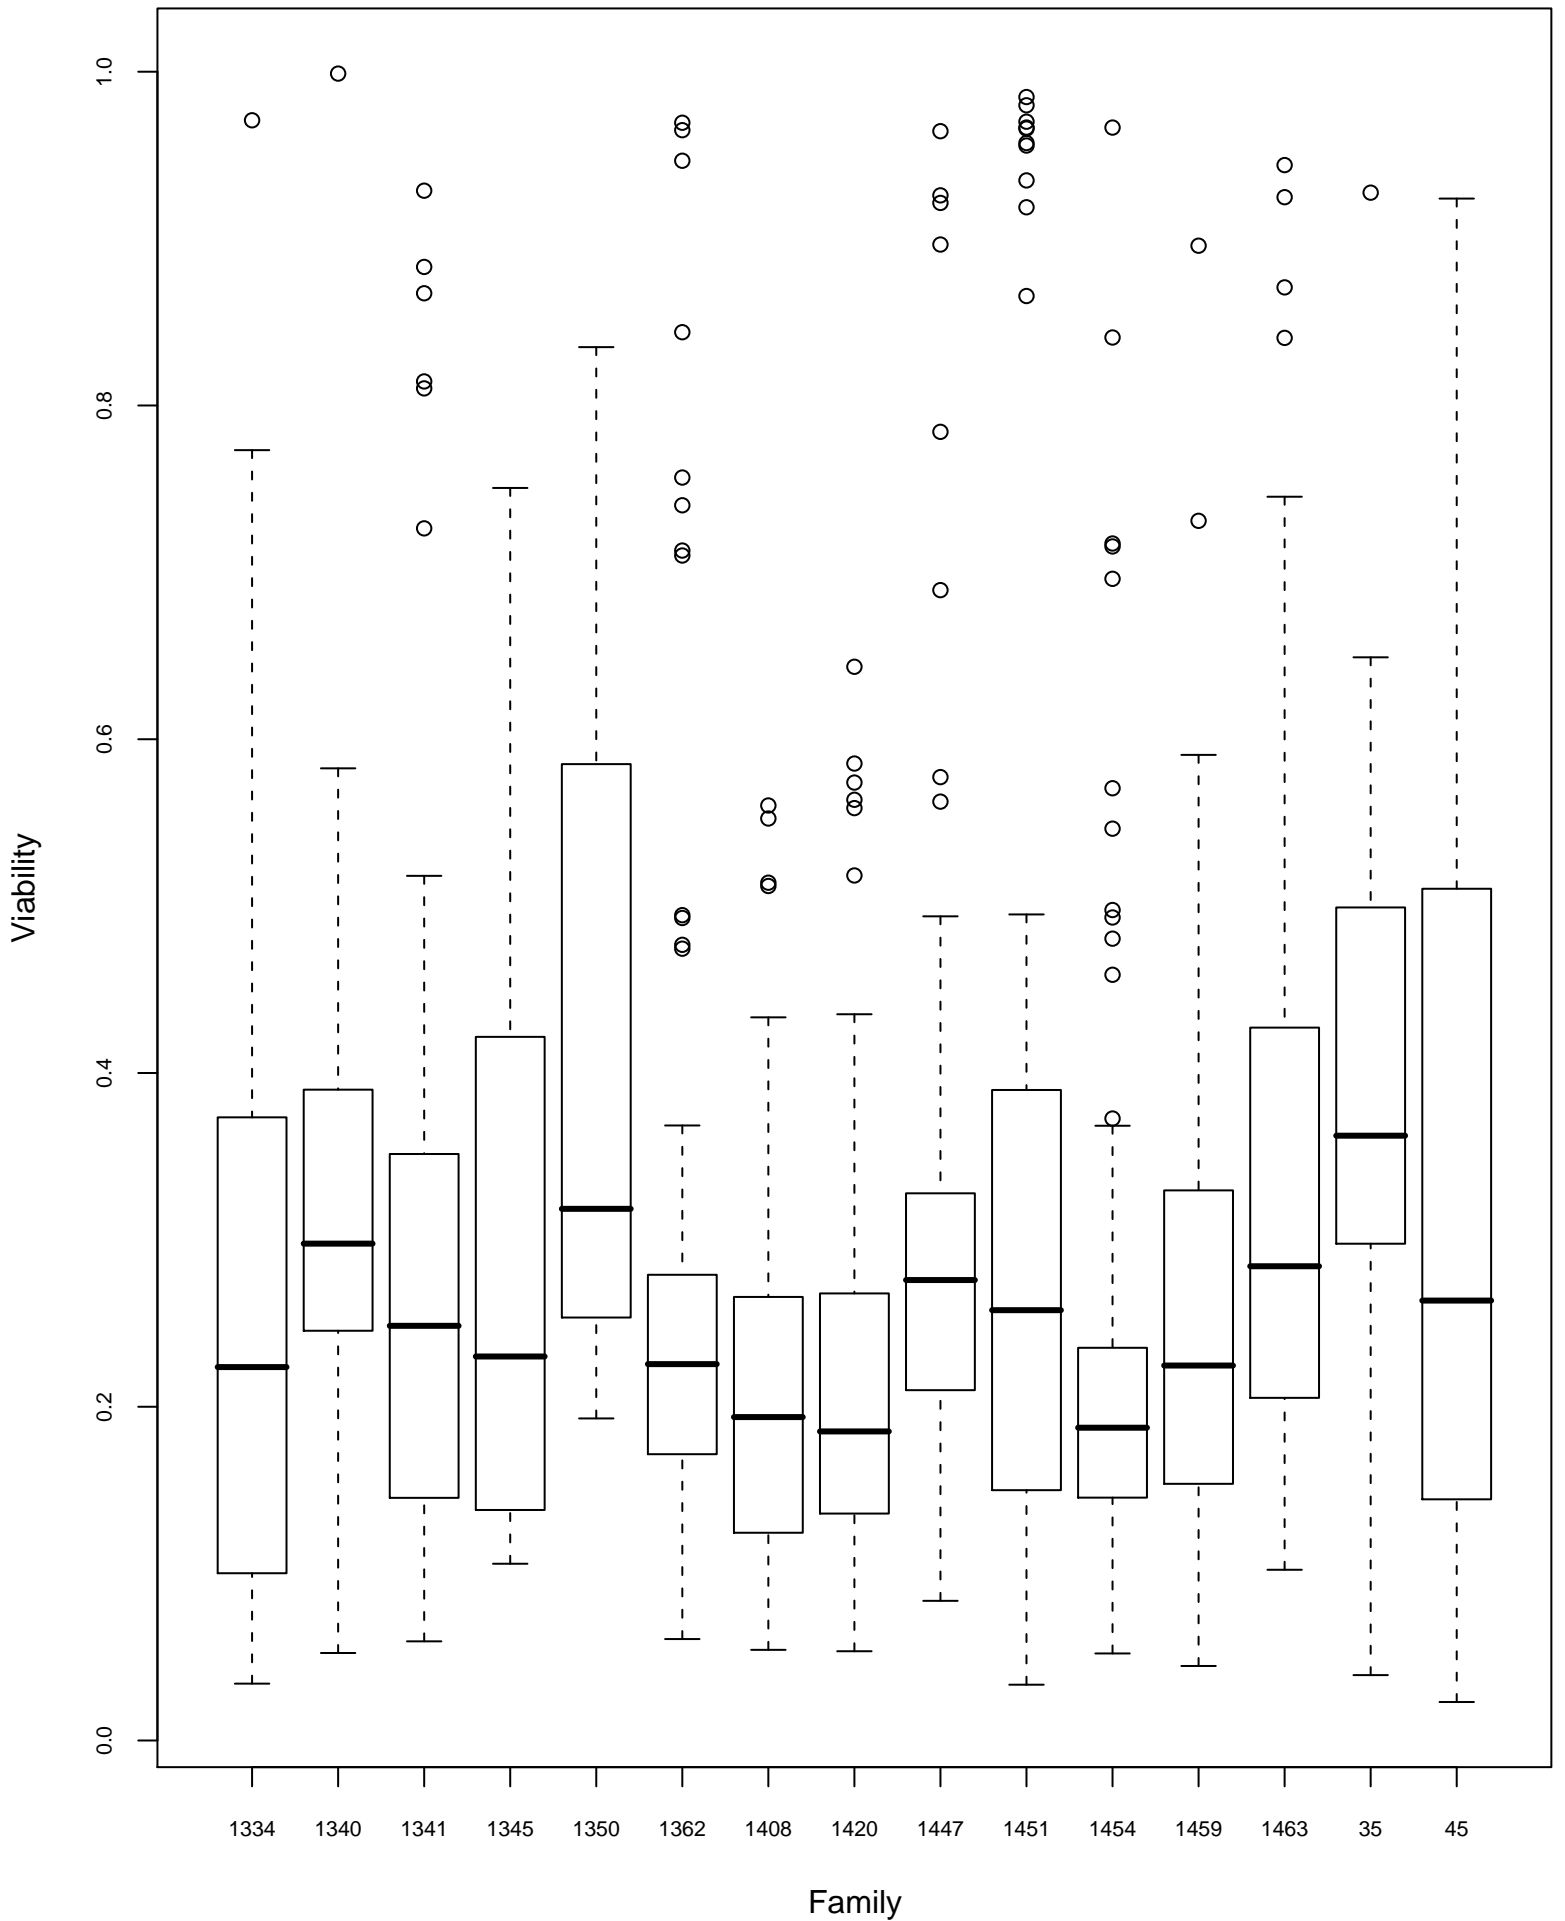

# Drug 84A1, dose 0.1 (mM)

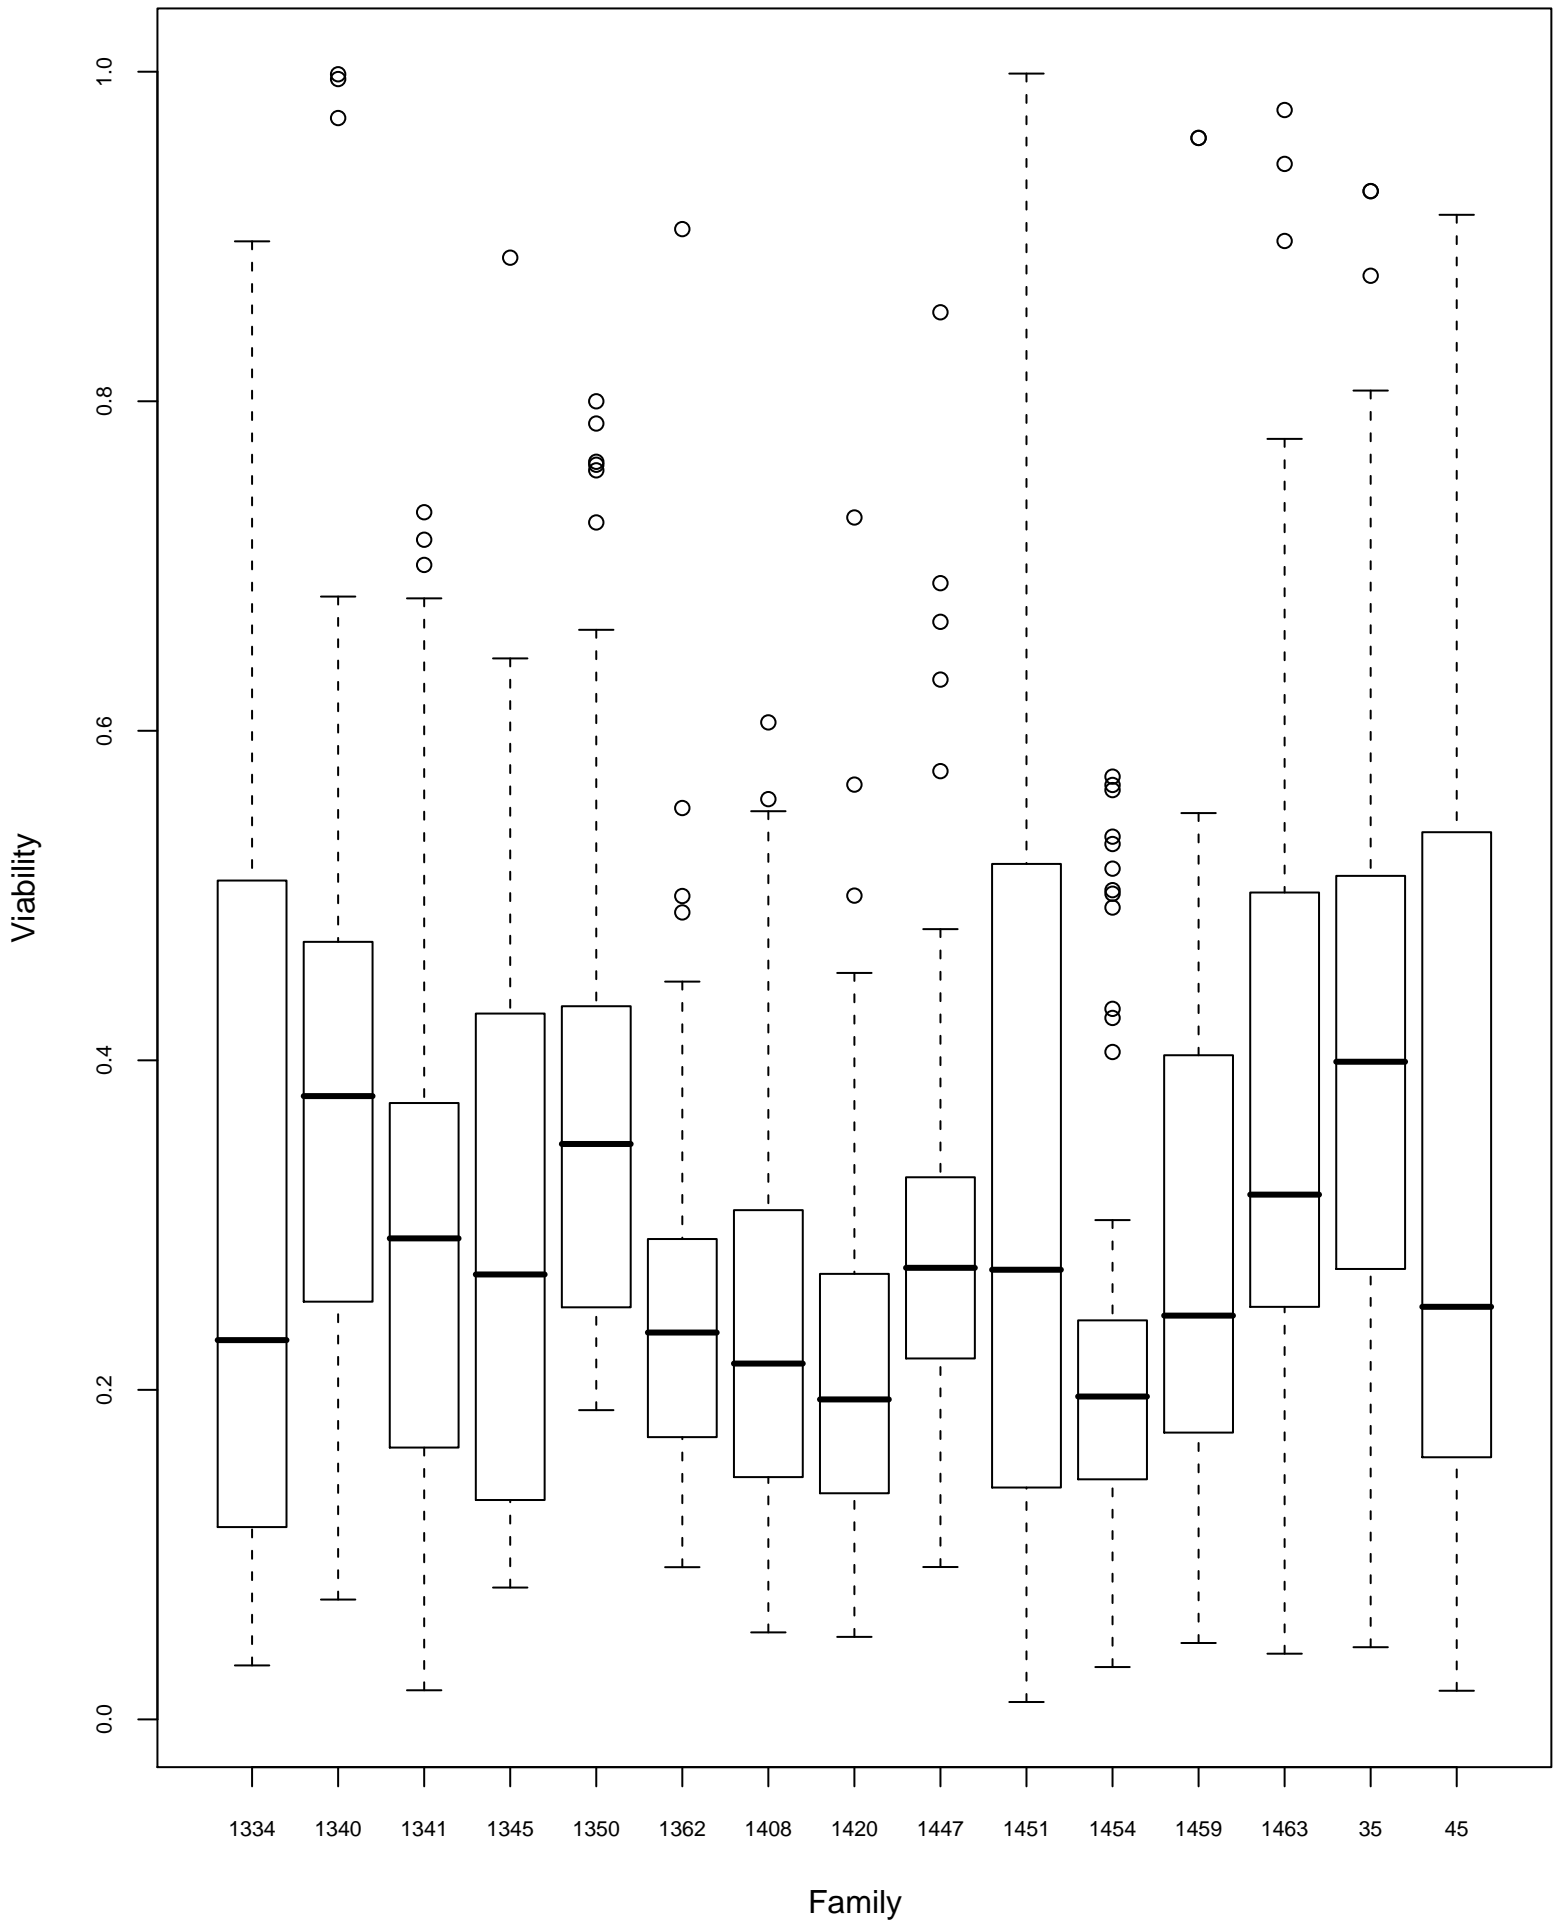

# Drug 84A1, dose 0.05 (mM)

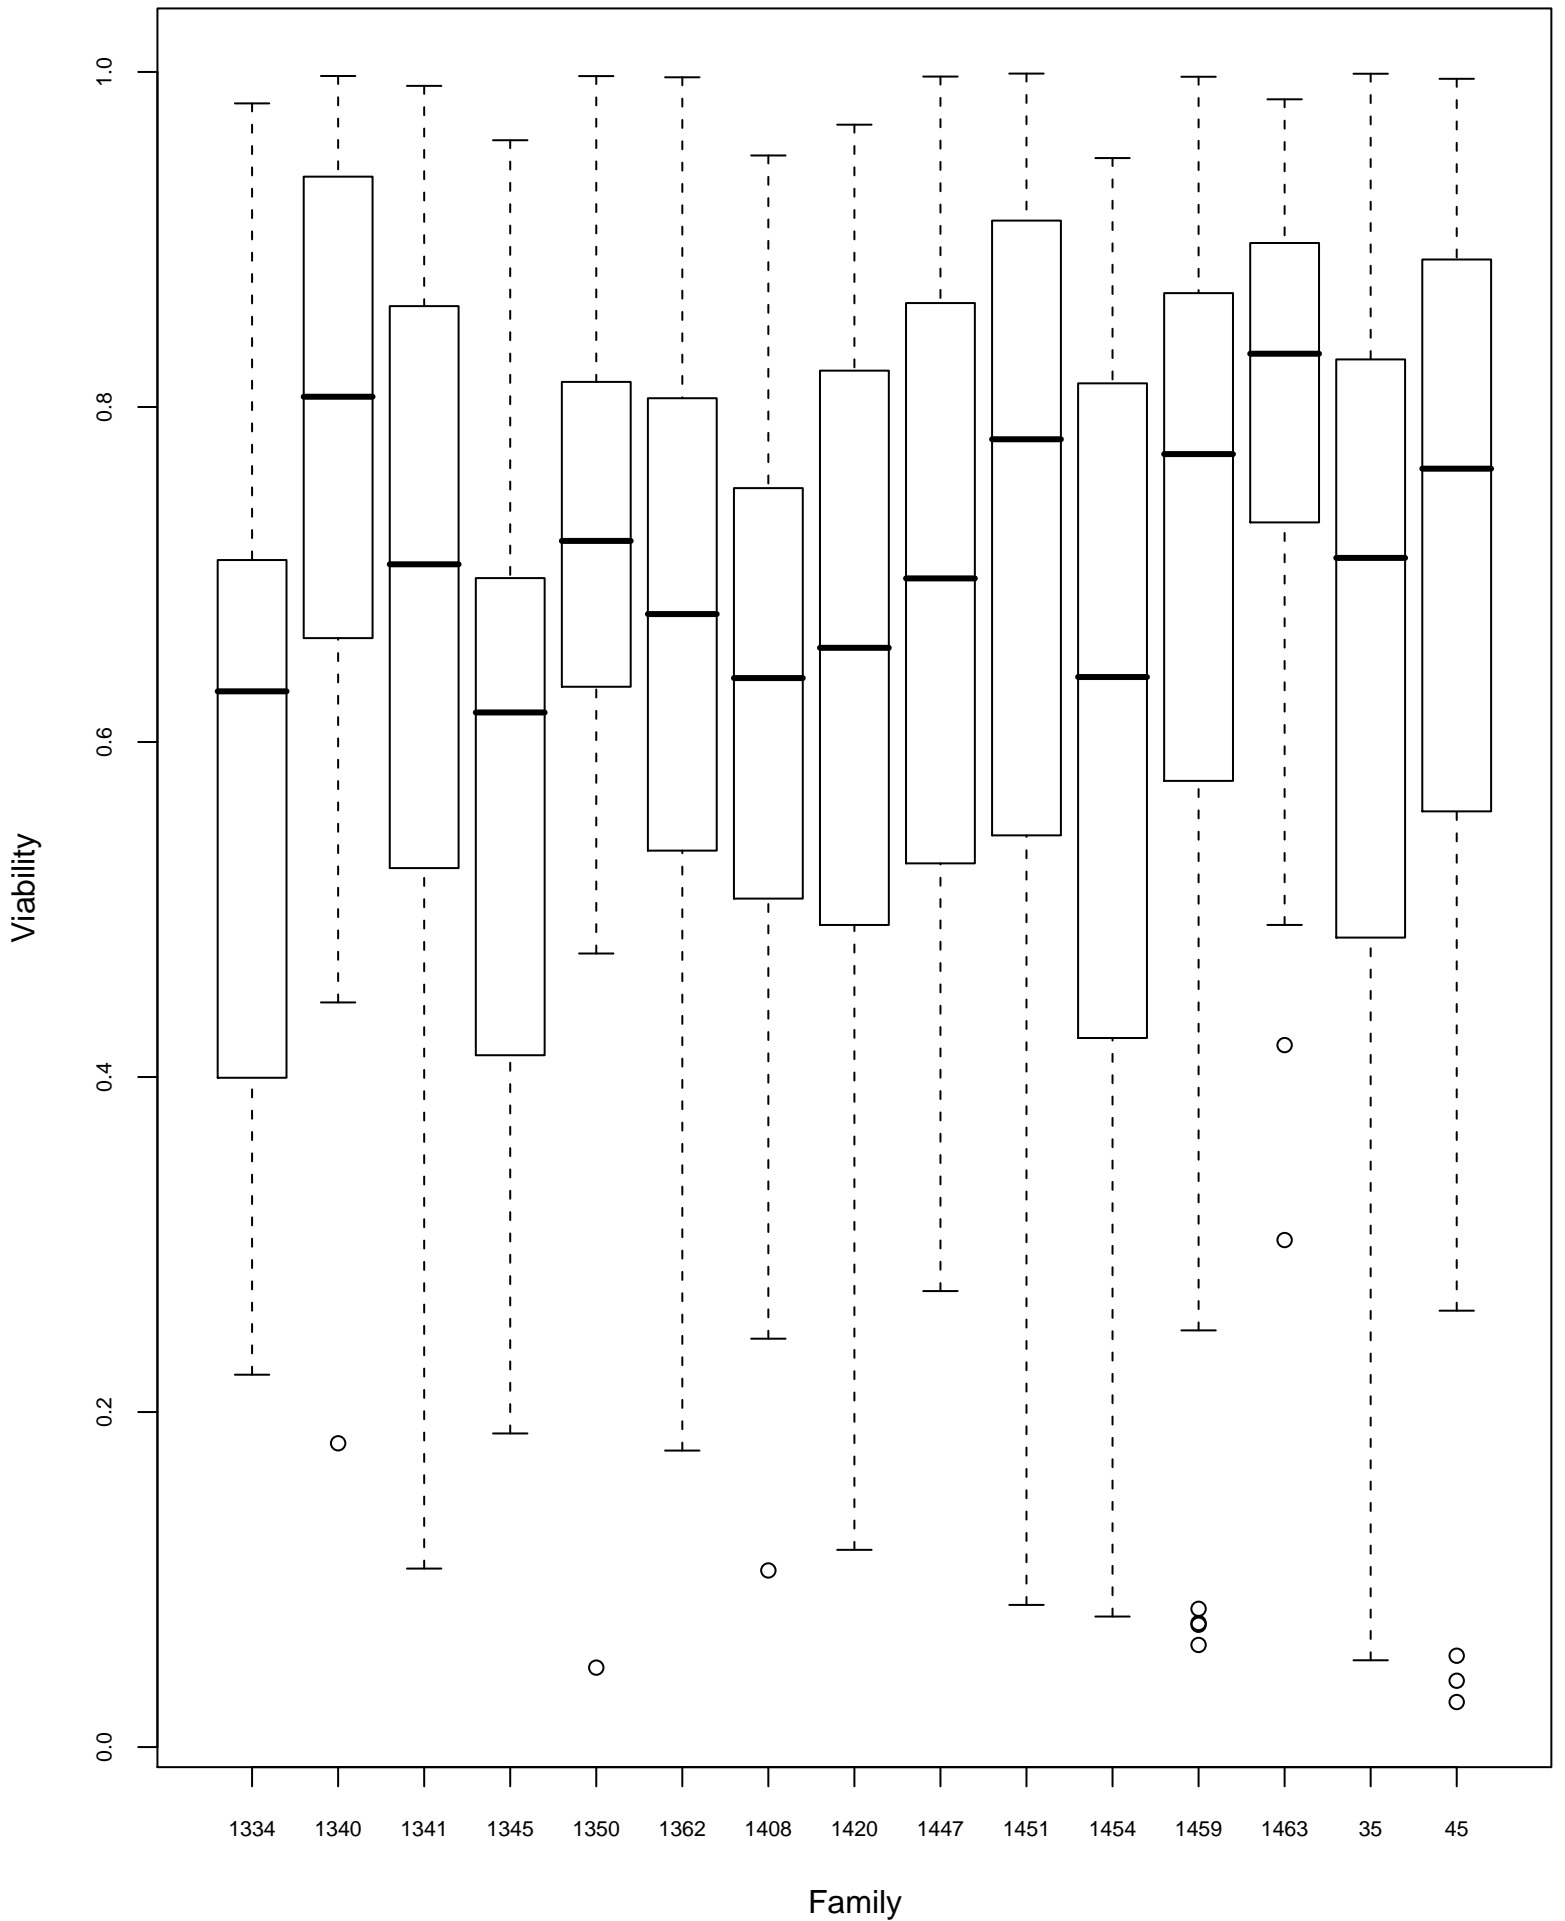

# Drug 84A1, dose 0.03 (mM)

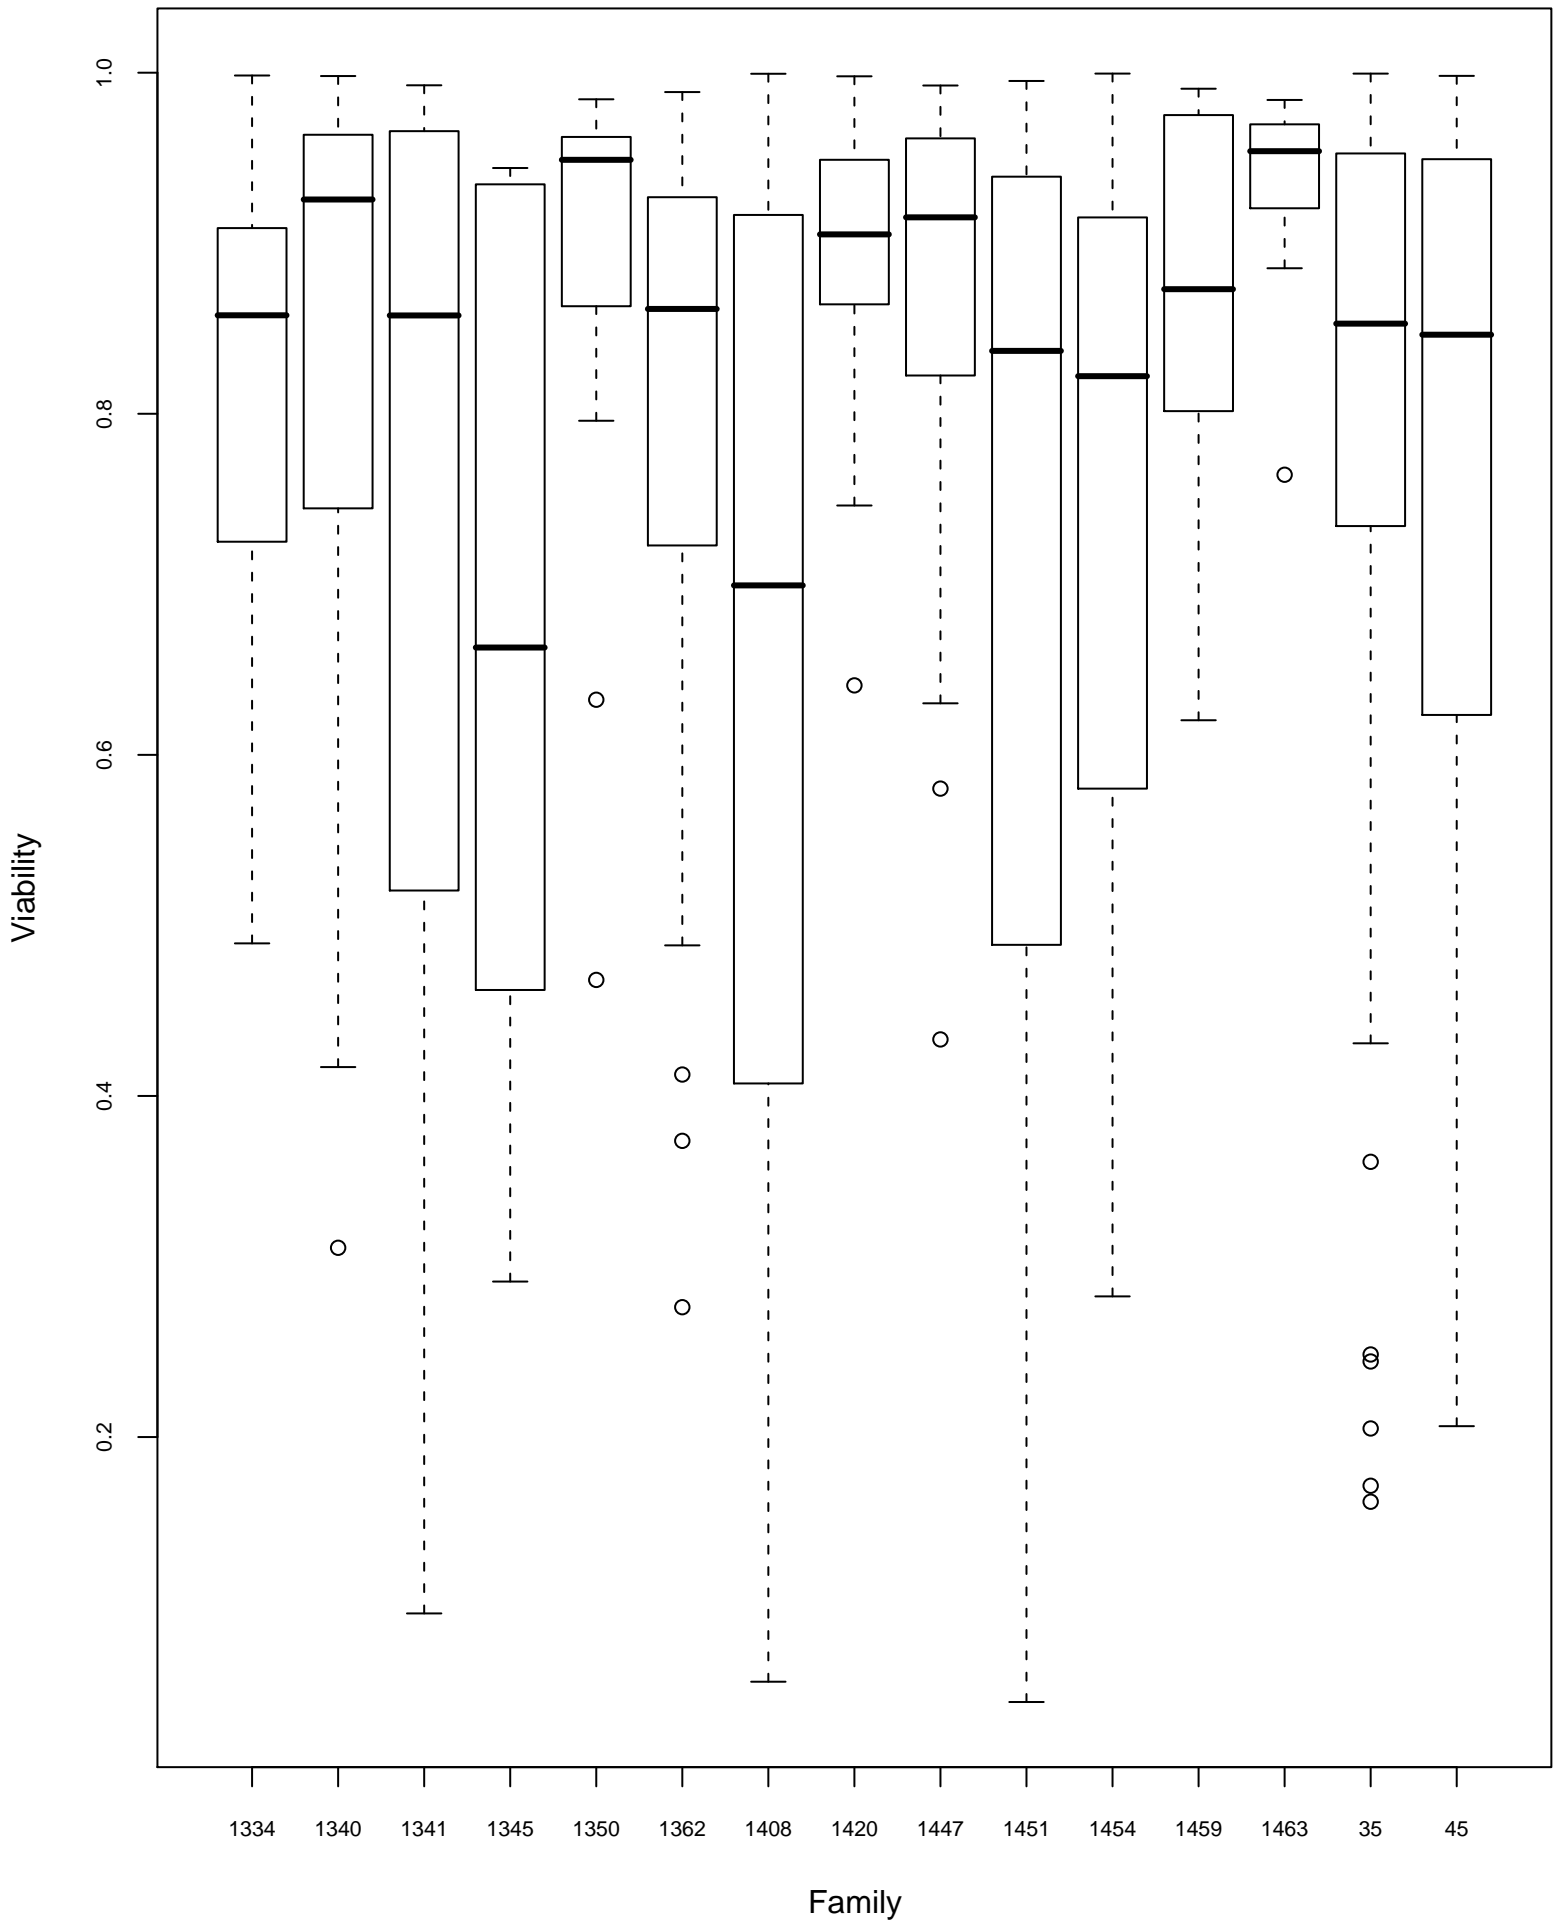

# Drug 84A1, dose 0.001 (mM)

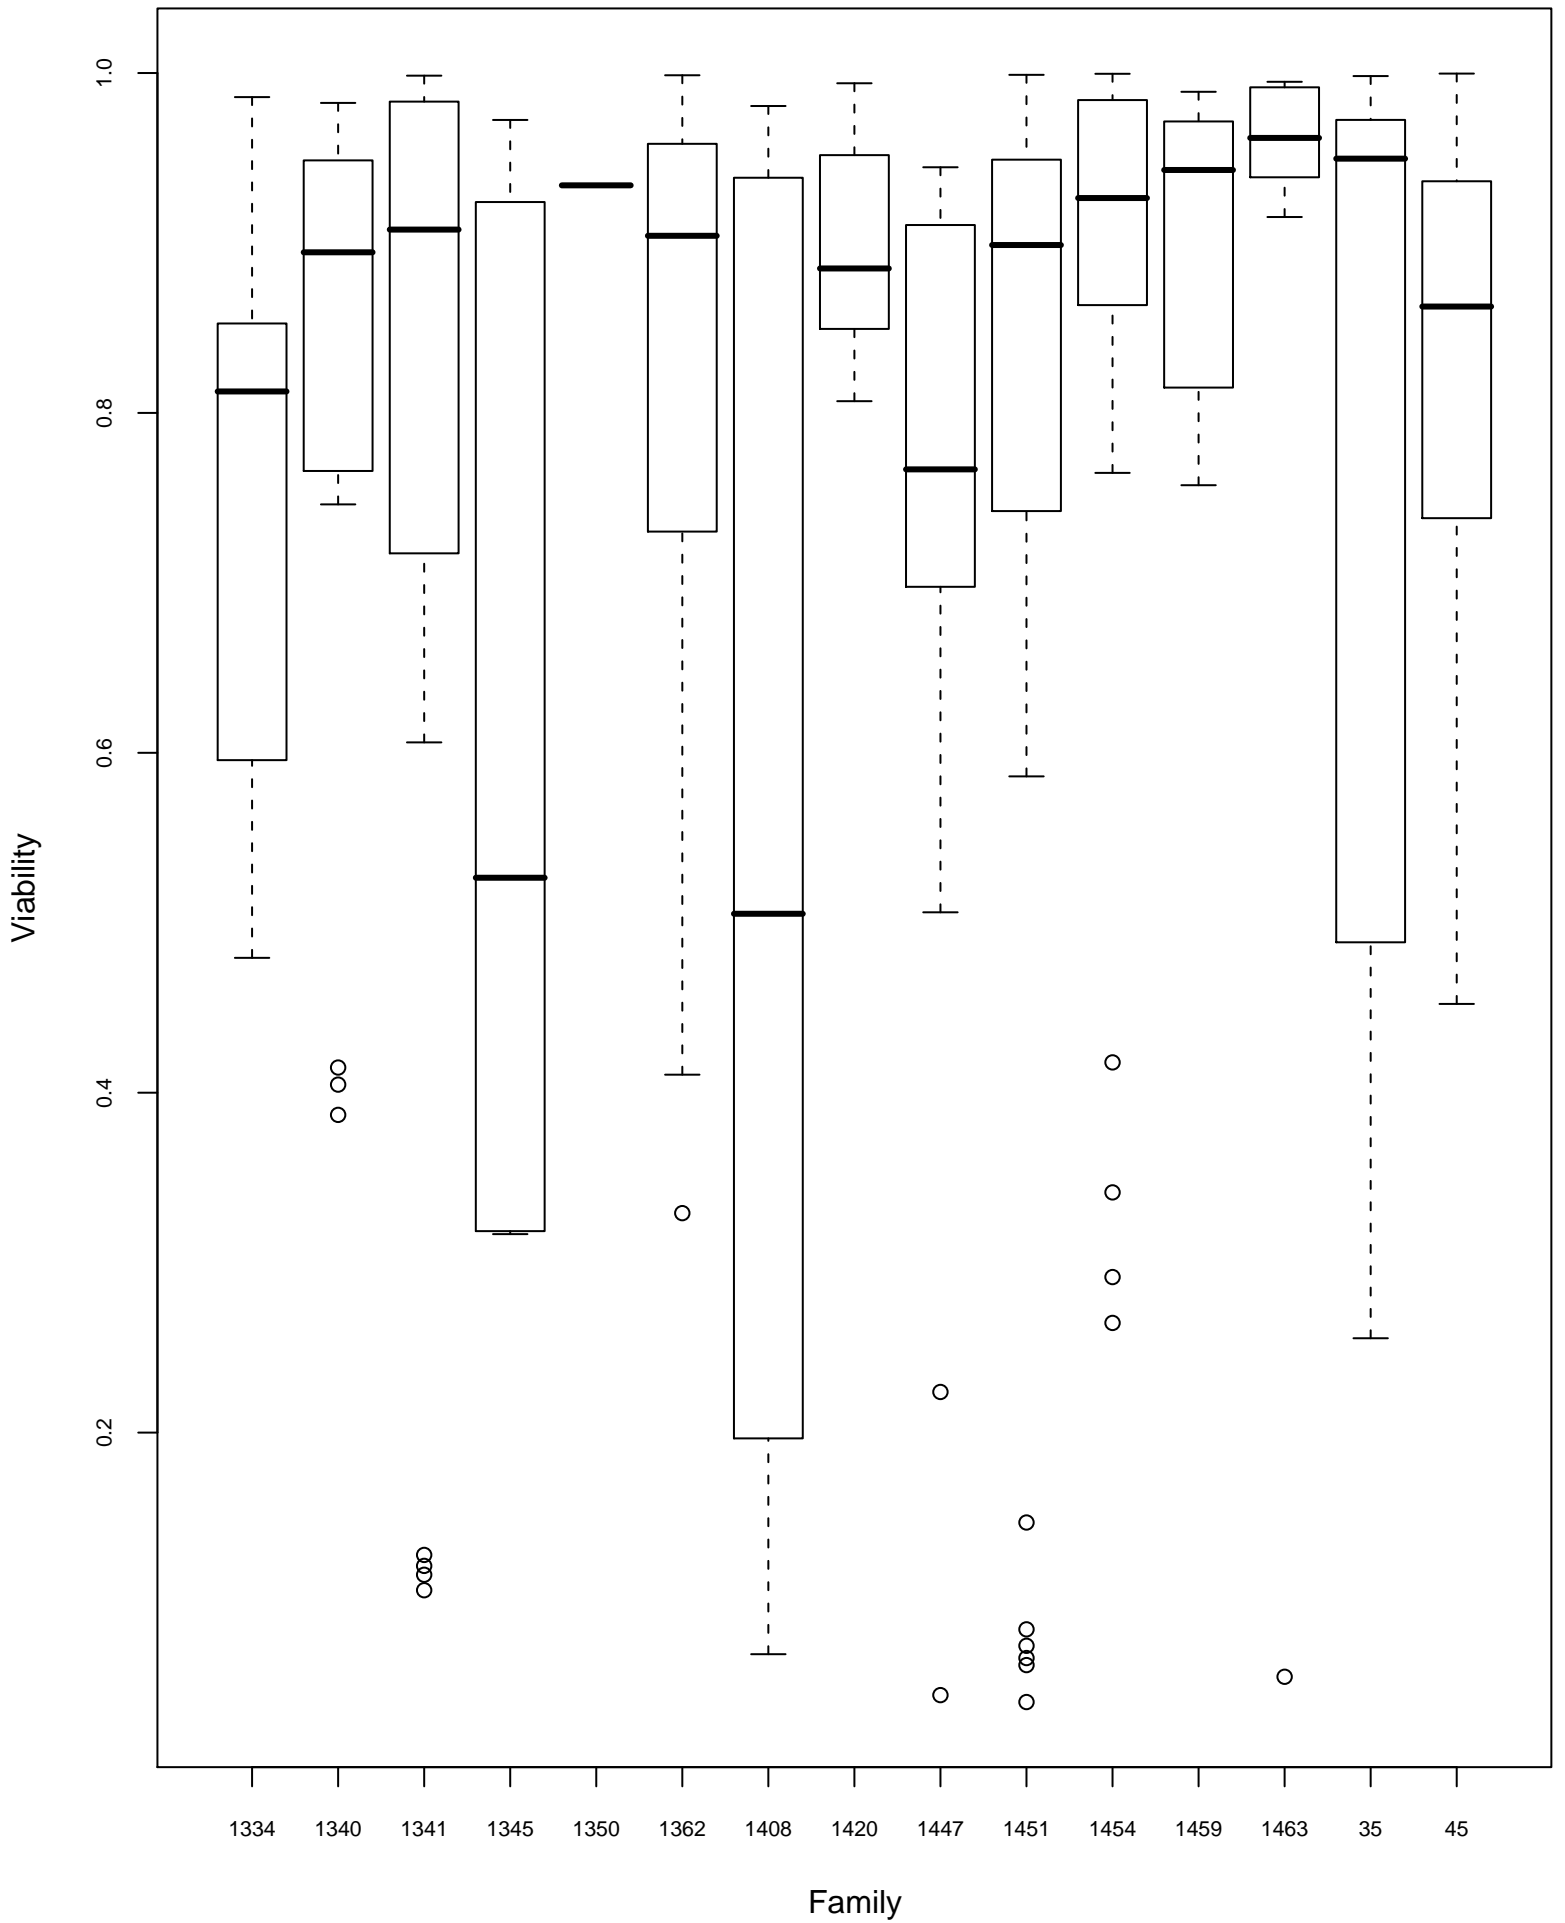

# Drug 85A1, dose 30.0 (mM)

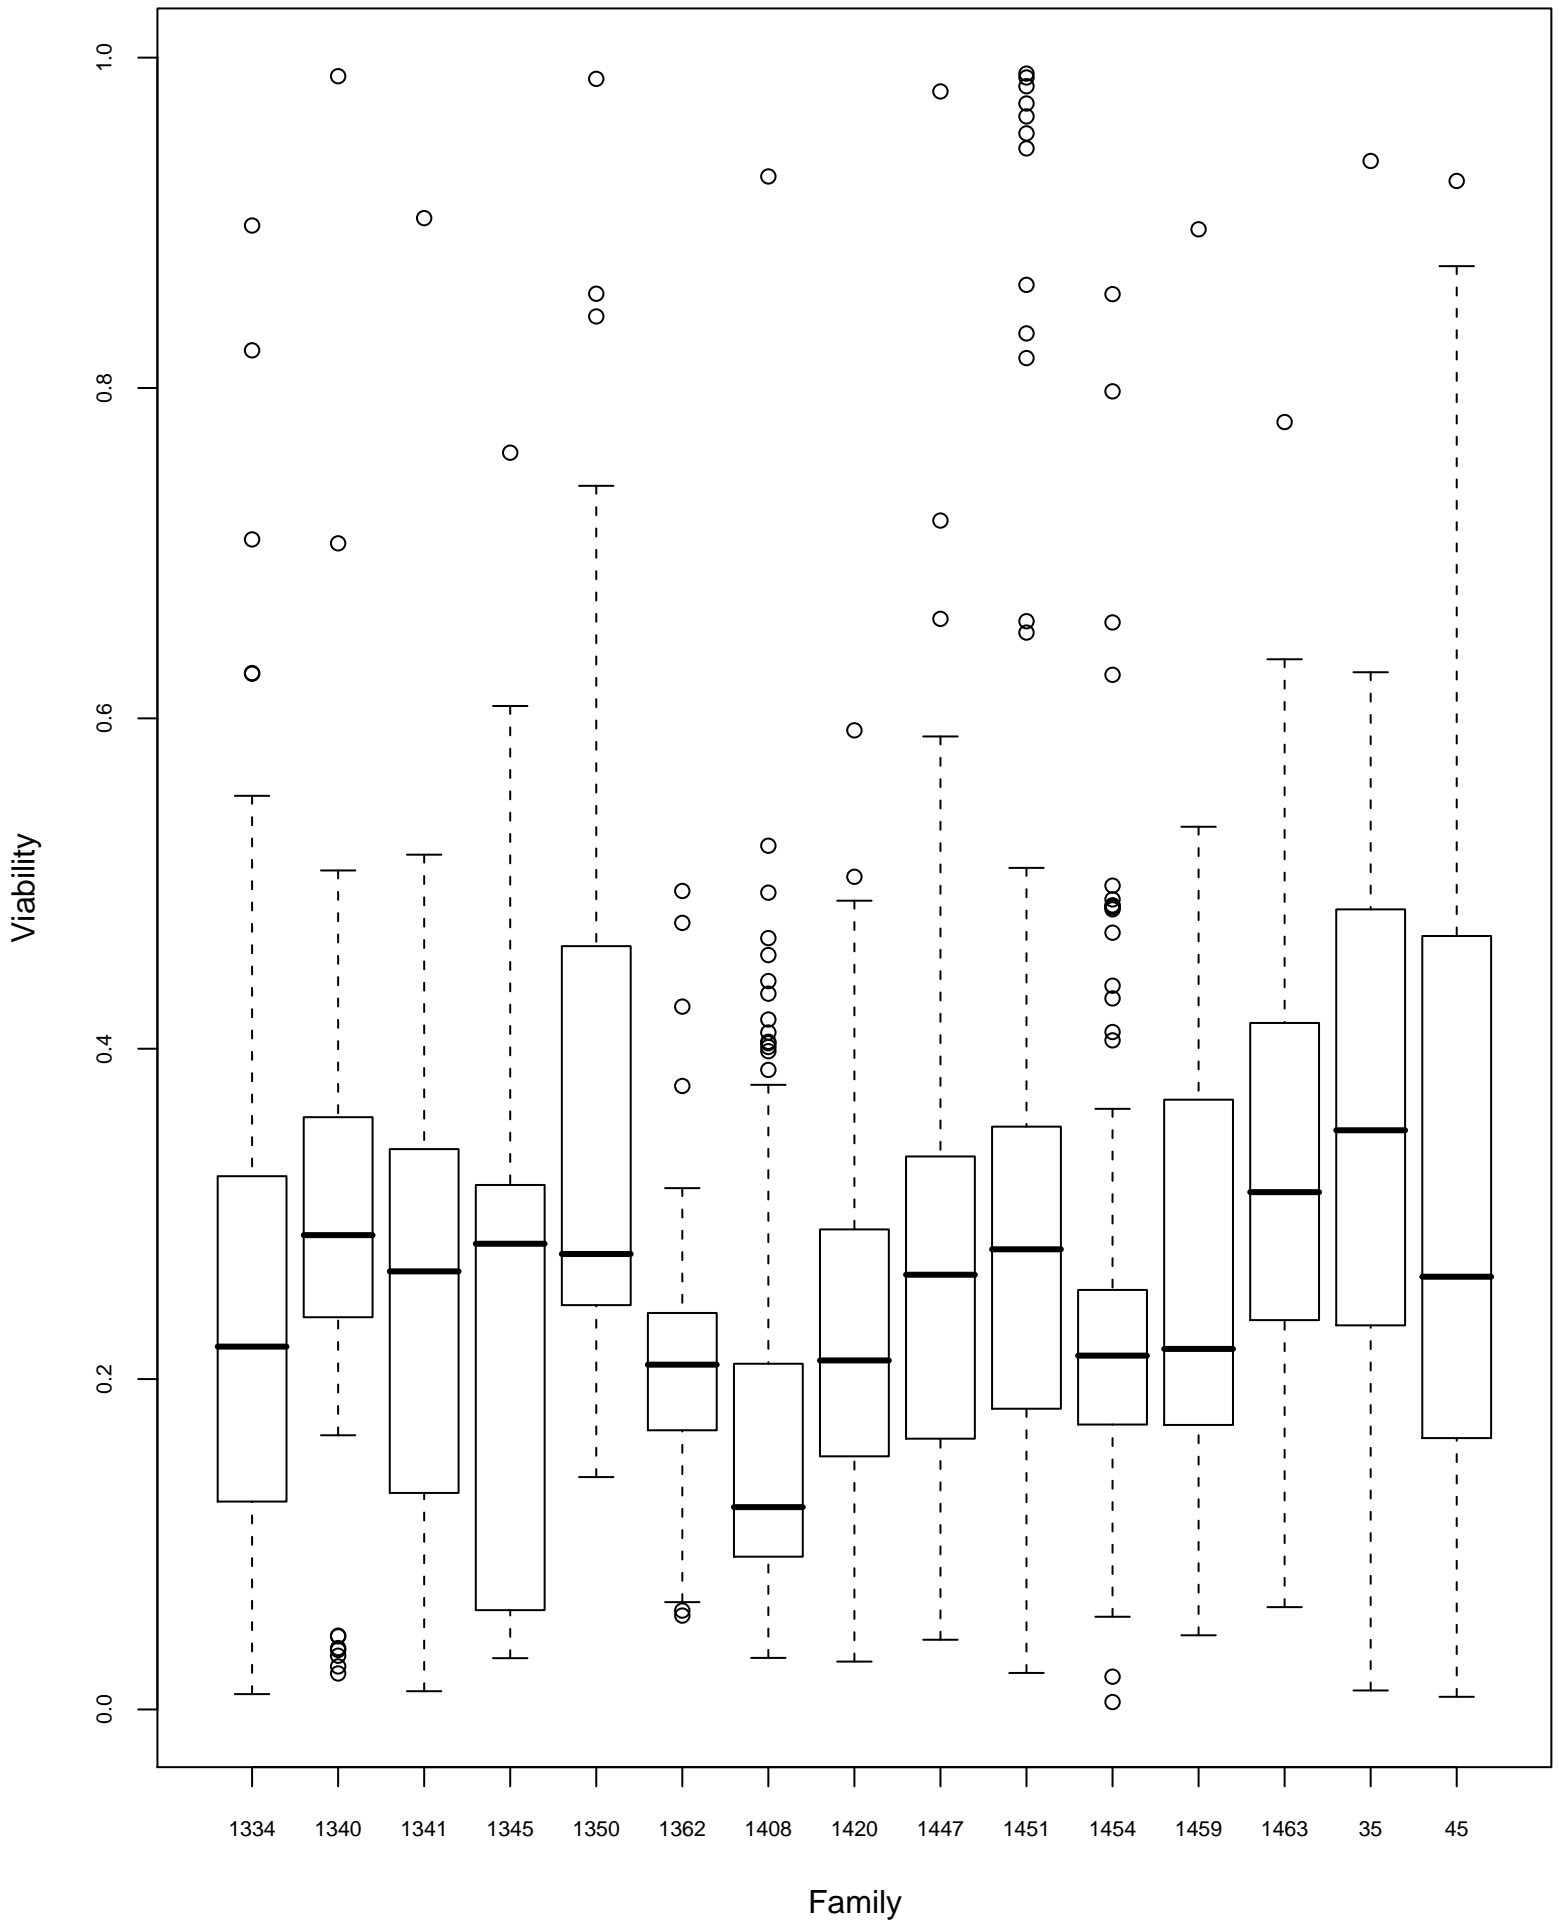

# Drug 85A1, dose 10.0 (mM)

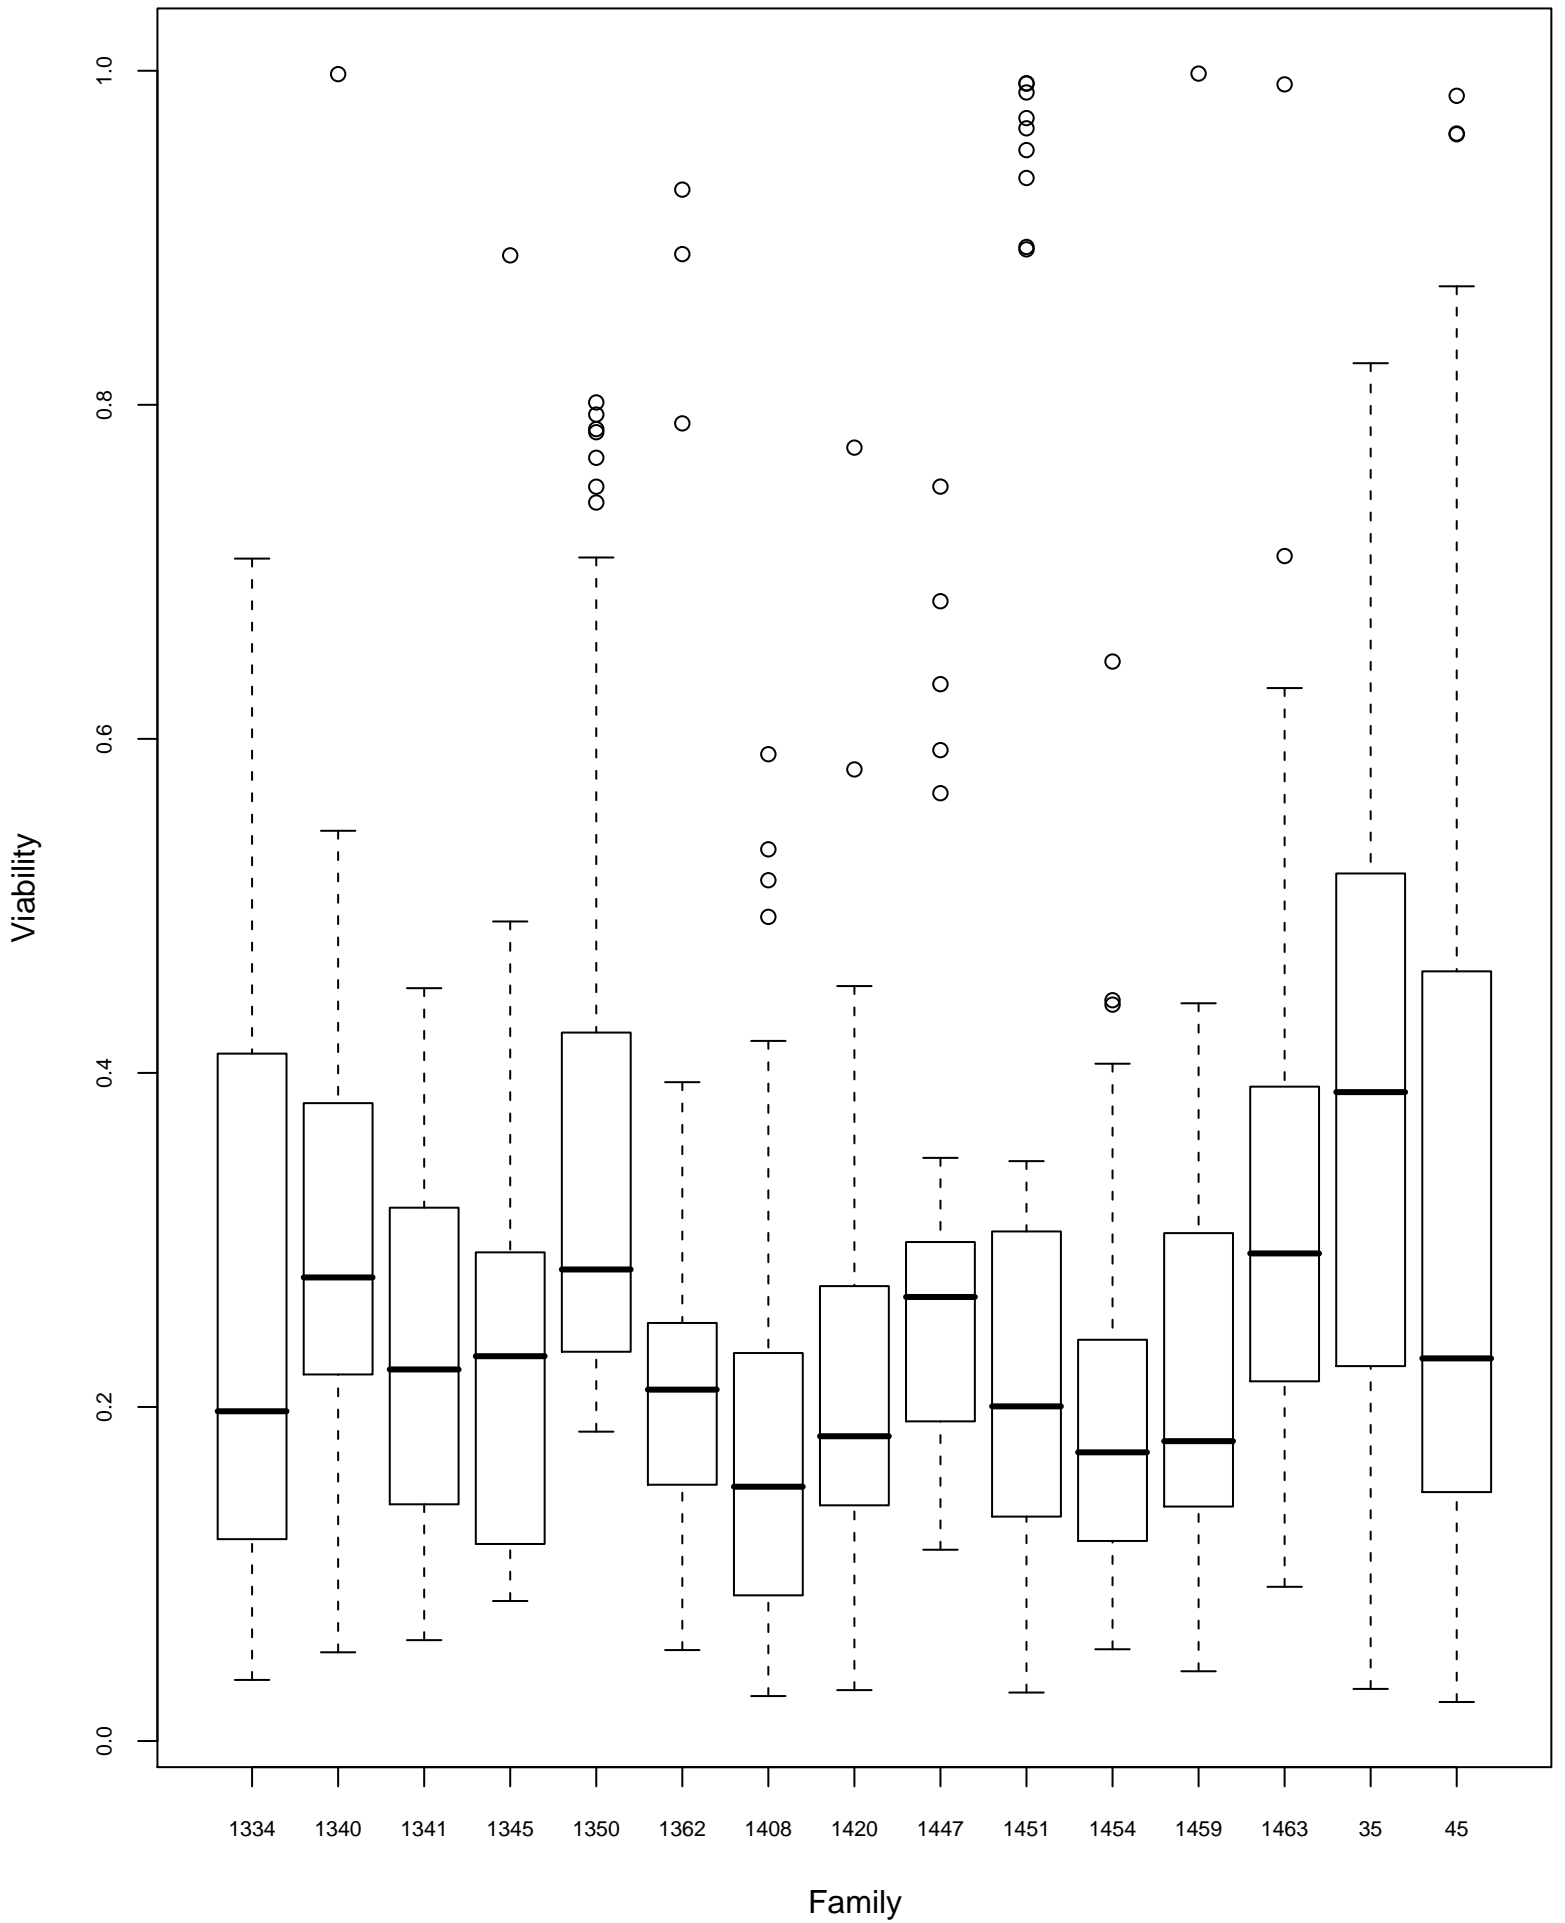

# Drug 85A1, dose 3.0 (mM)

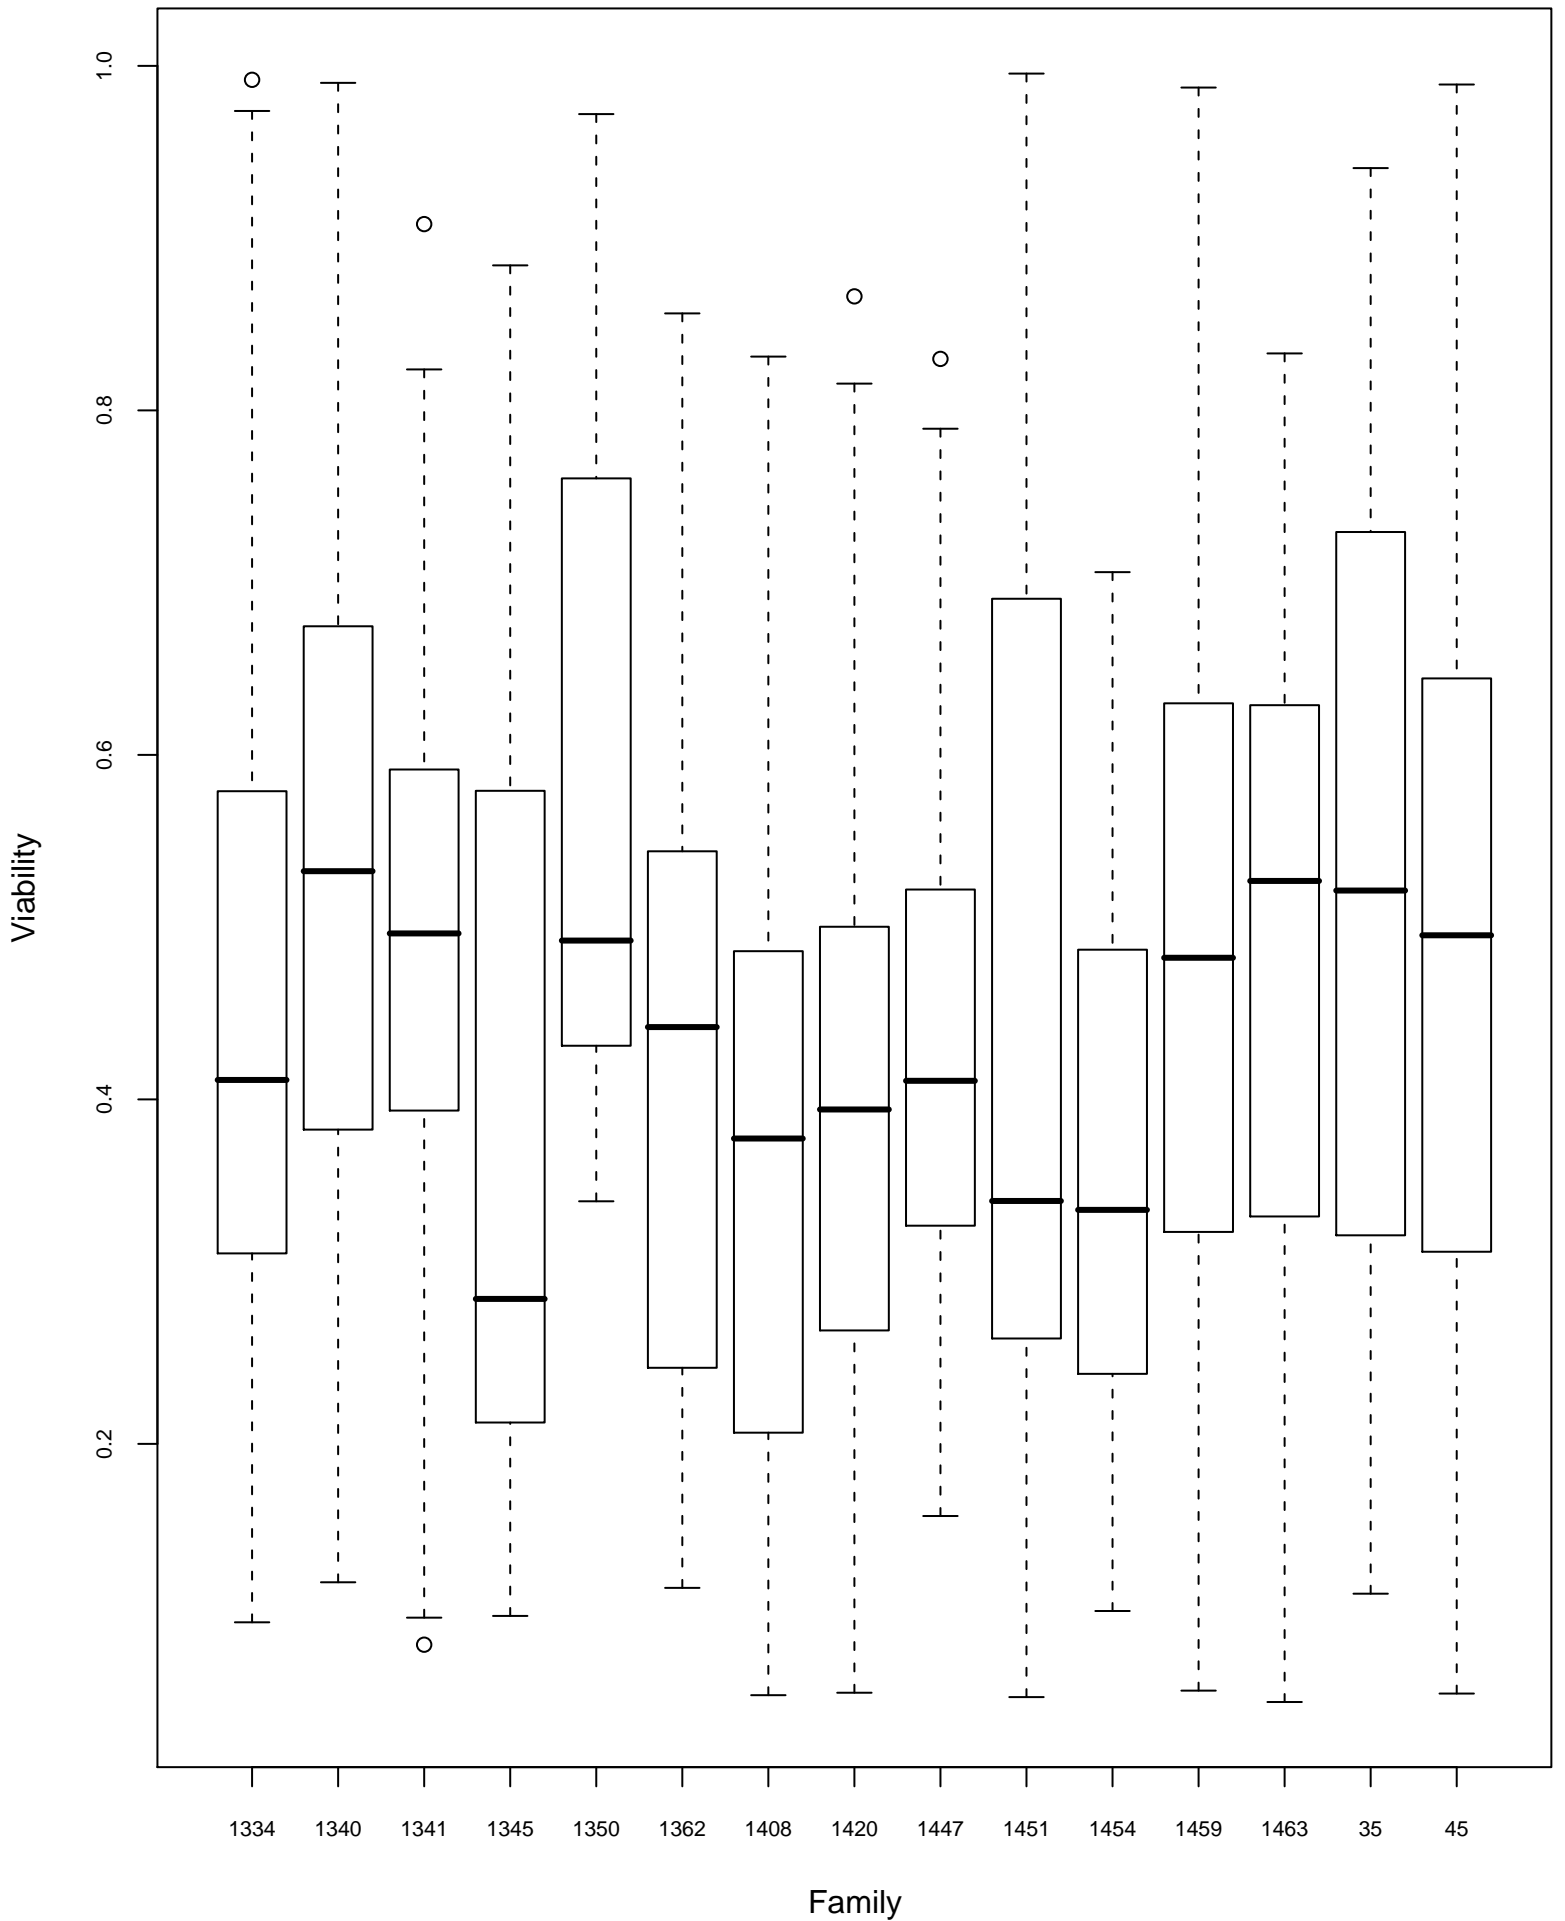



# Drug 85A1, dose 1.0 (mM)

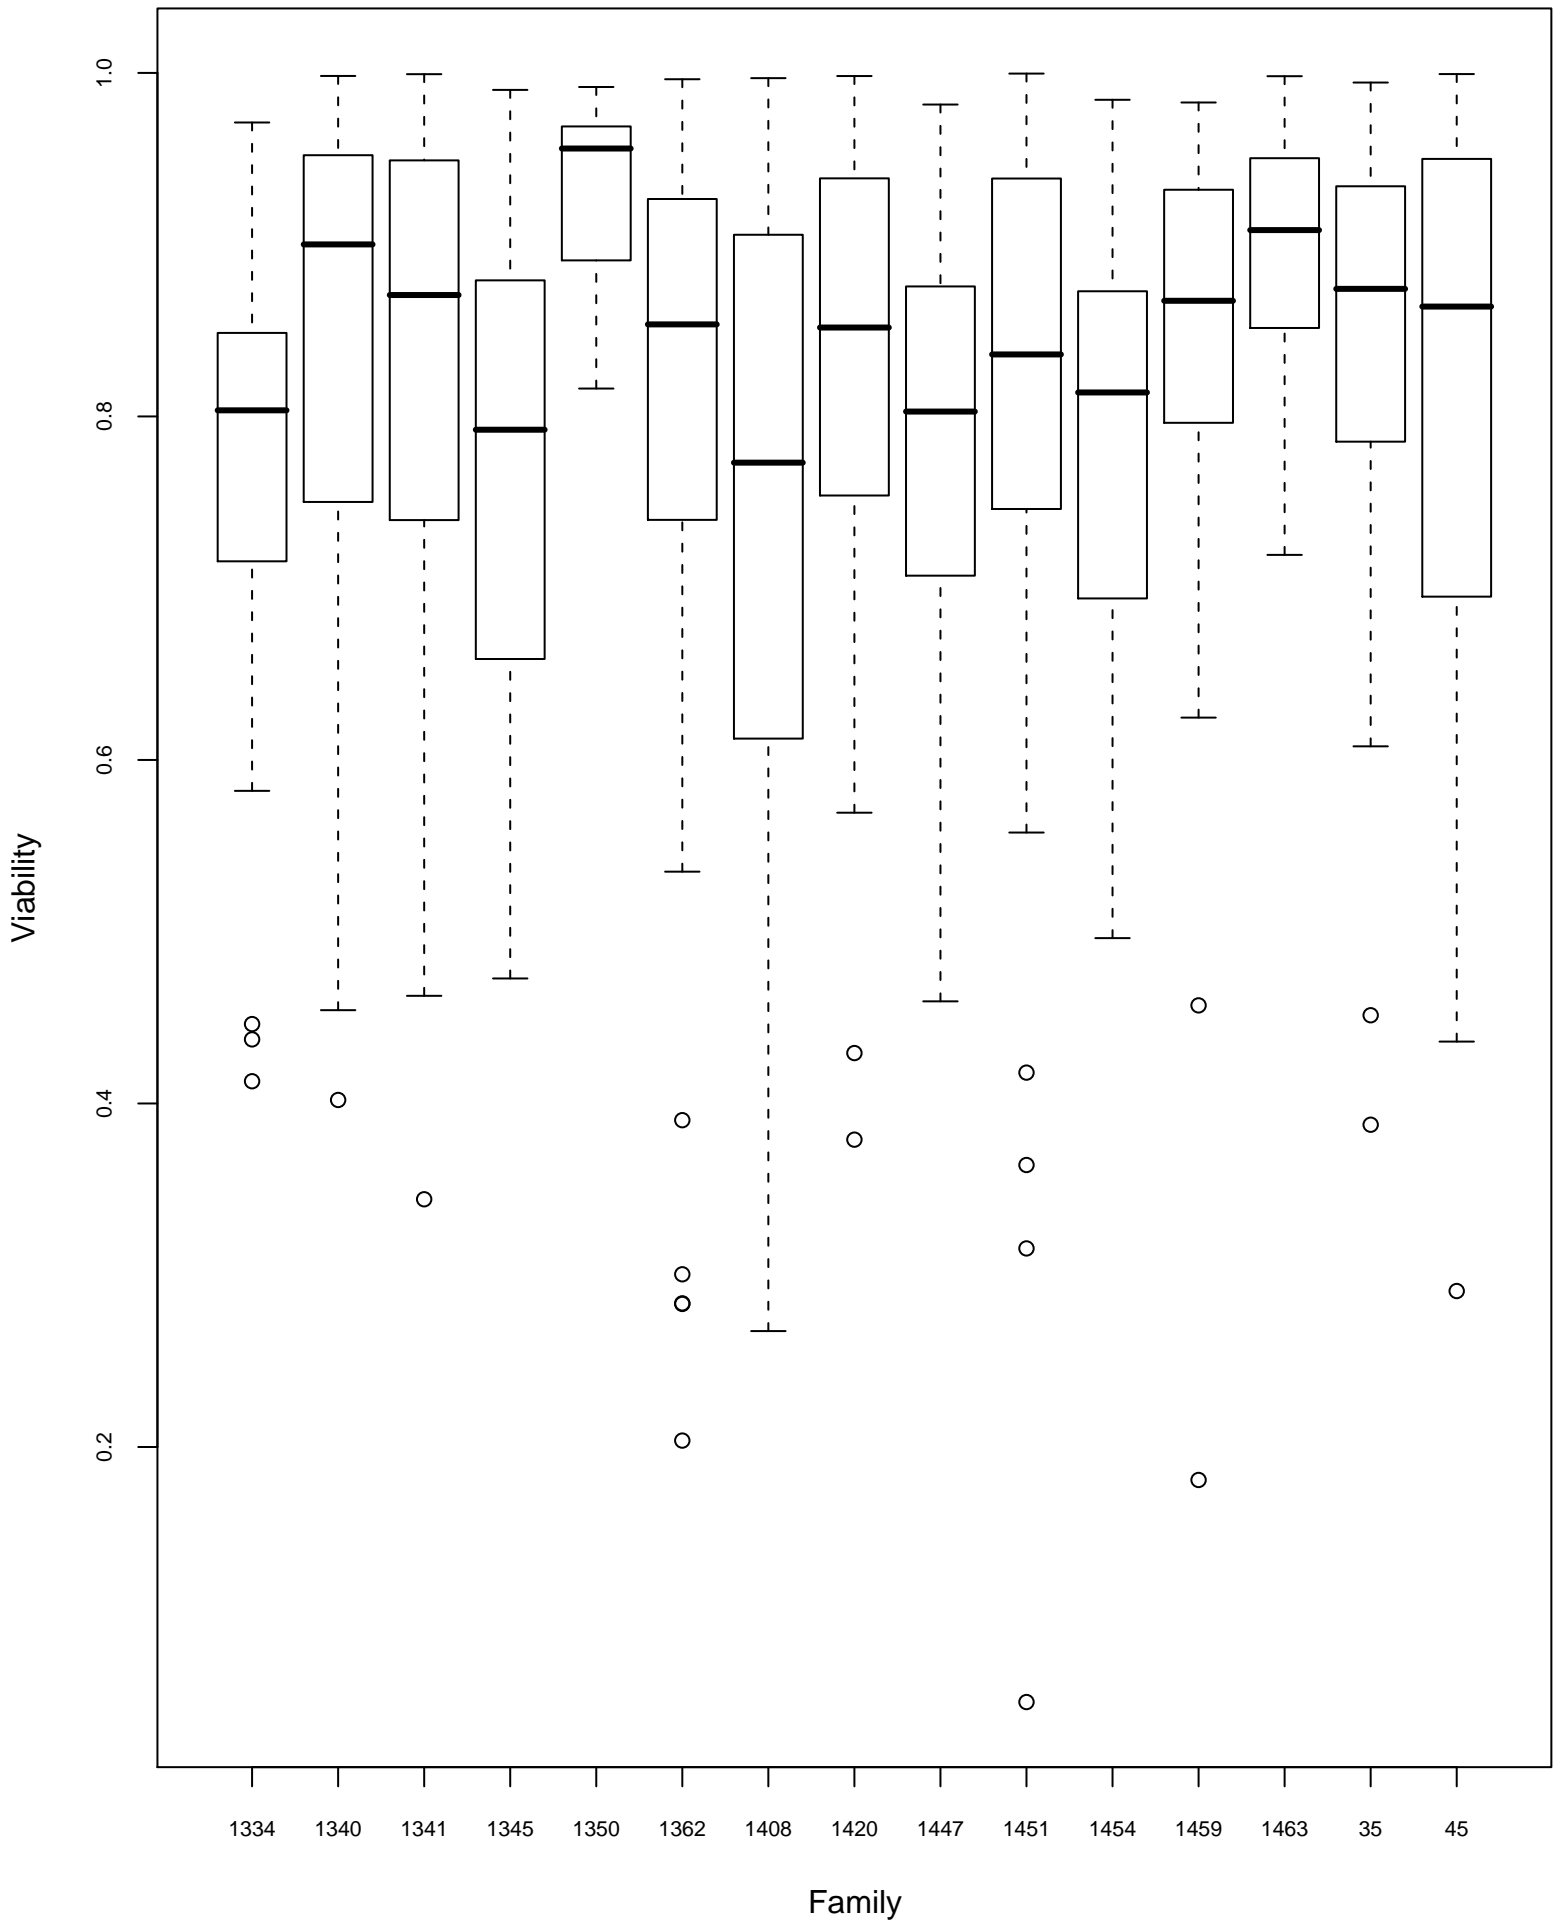

# Drug 85A1, dose 0.5 (mM)

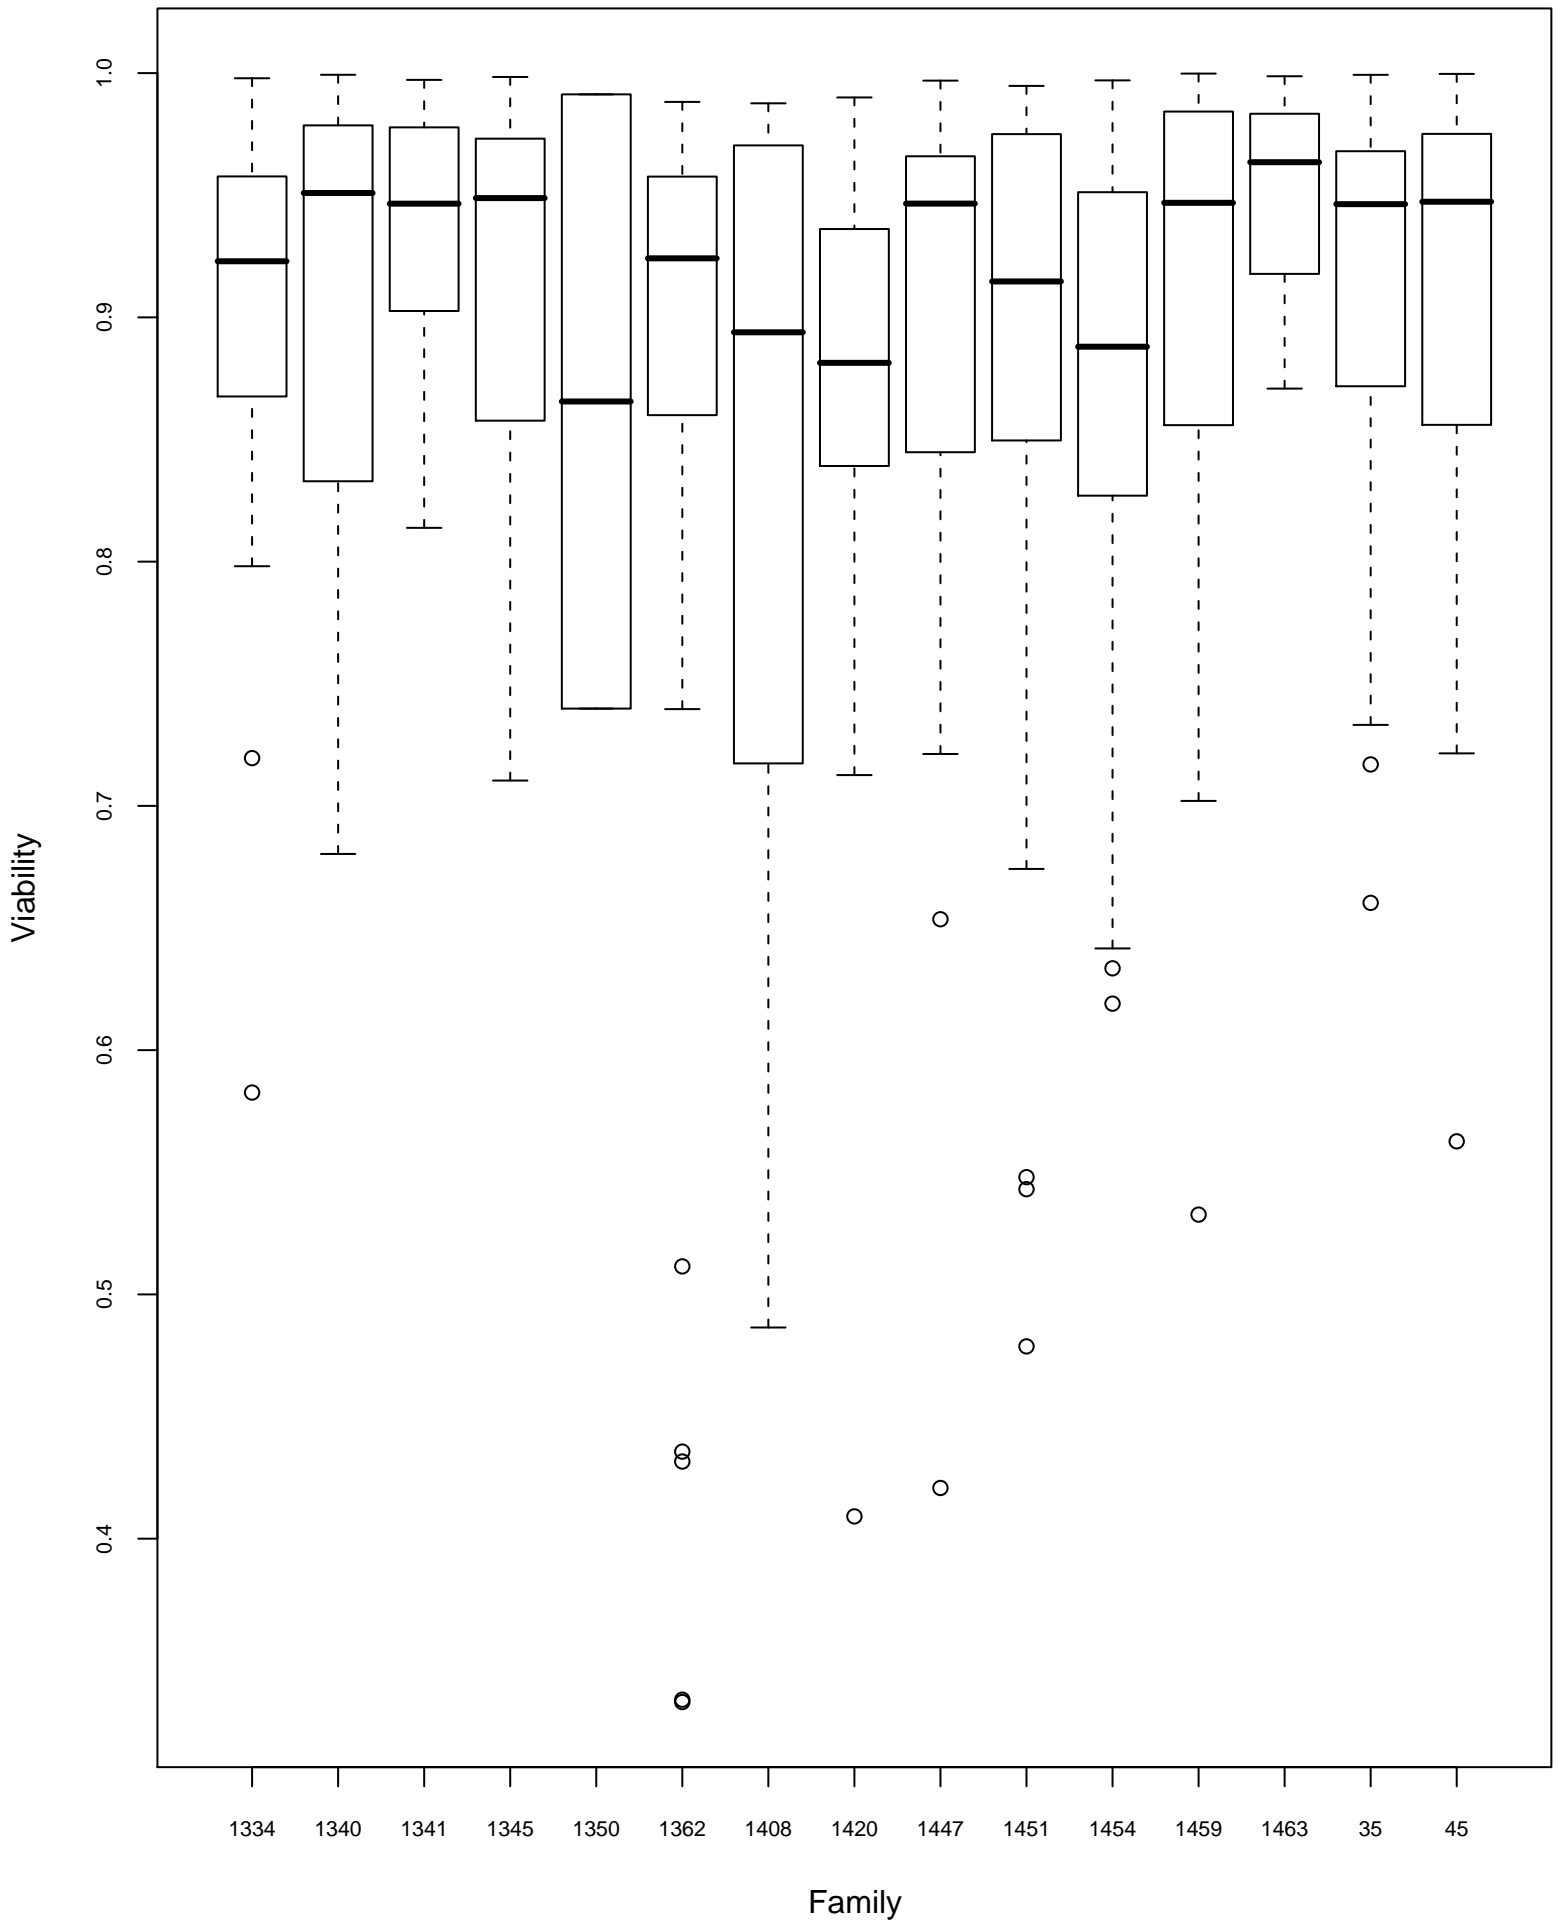

# Drug 85A1, dose 0.23 (mM)

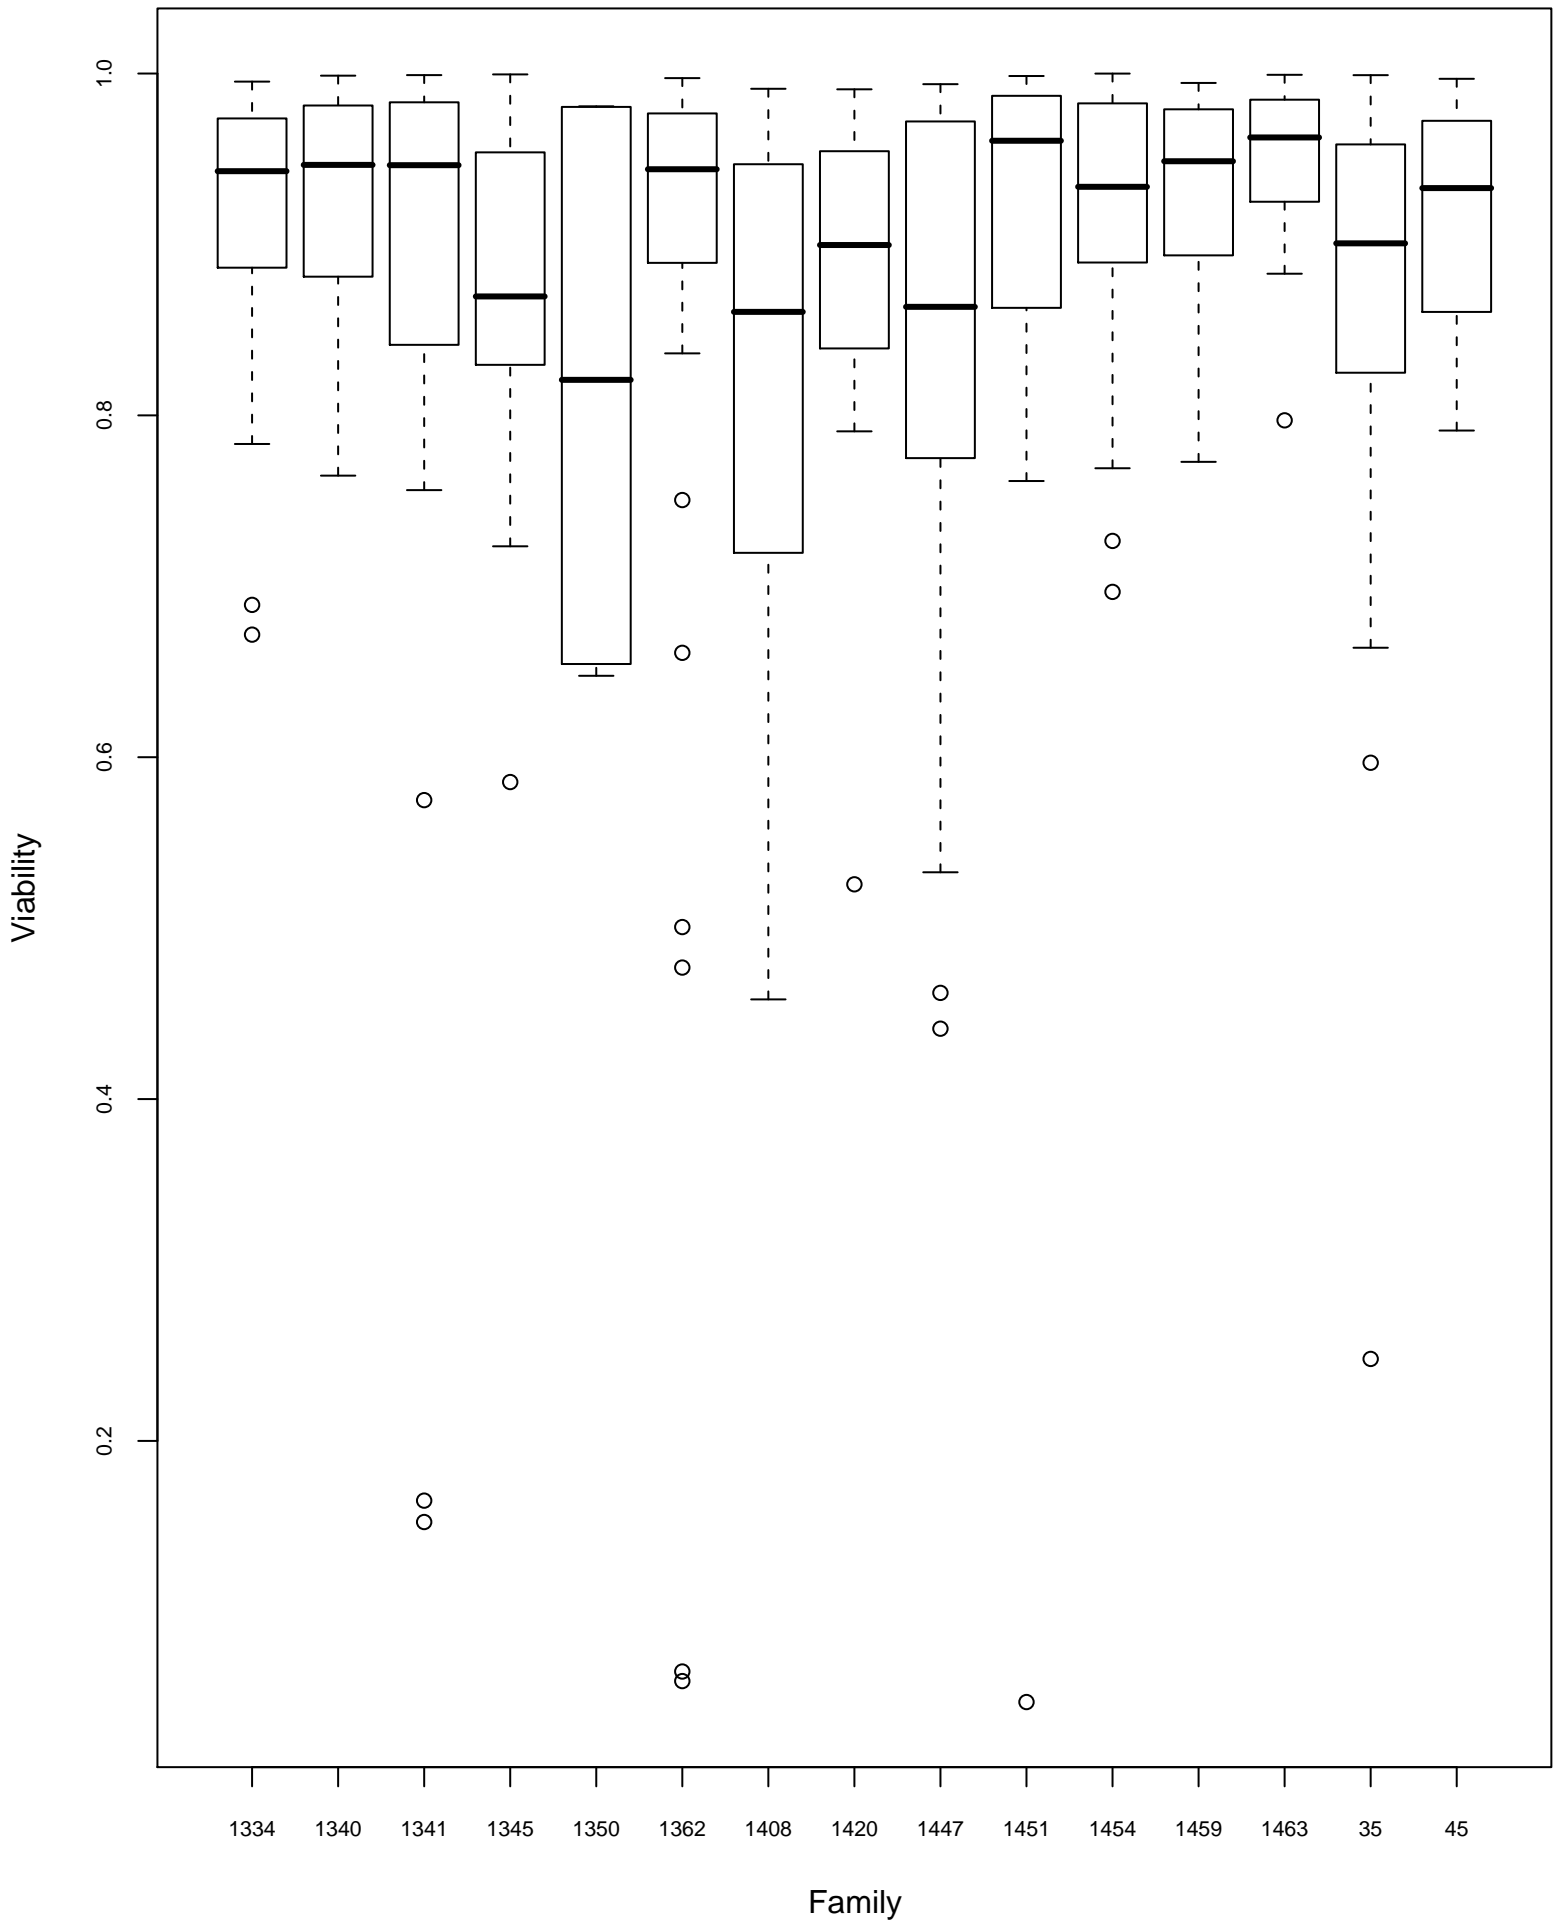

# Drug 85A1, dose 0.16 (mM)

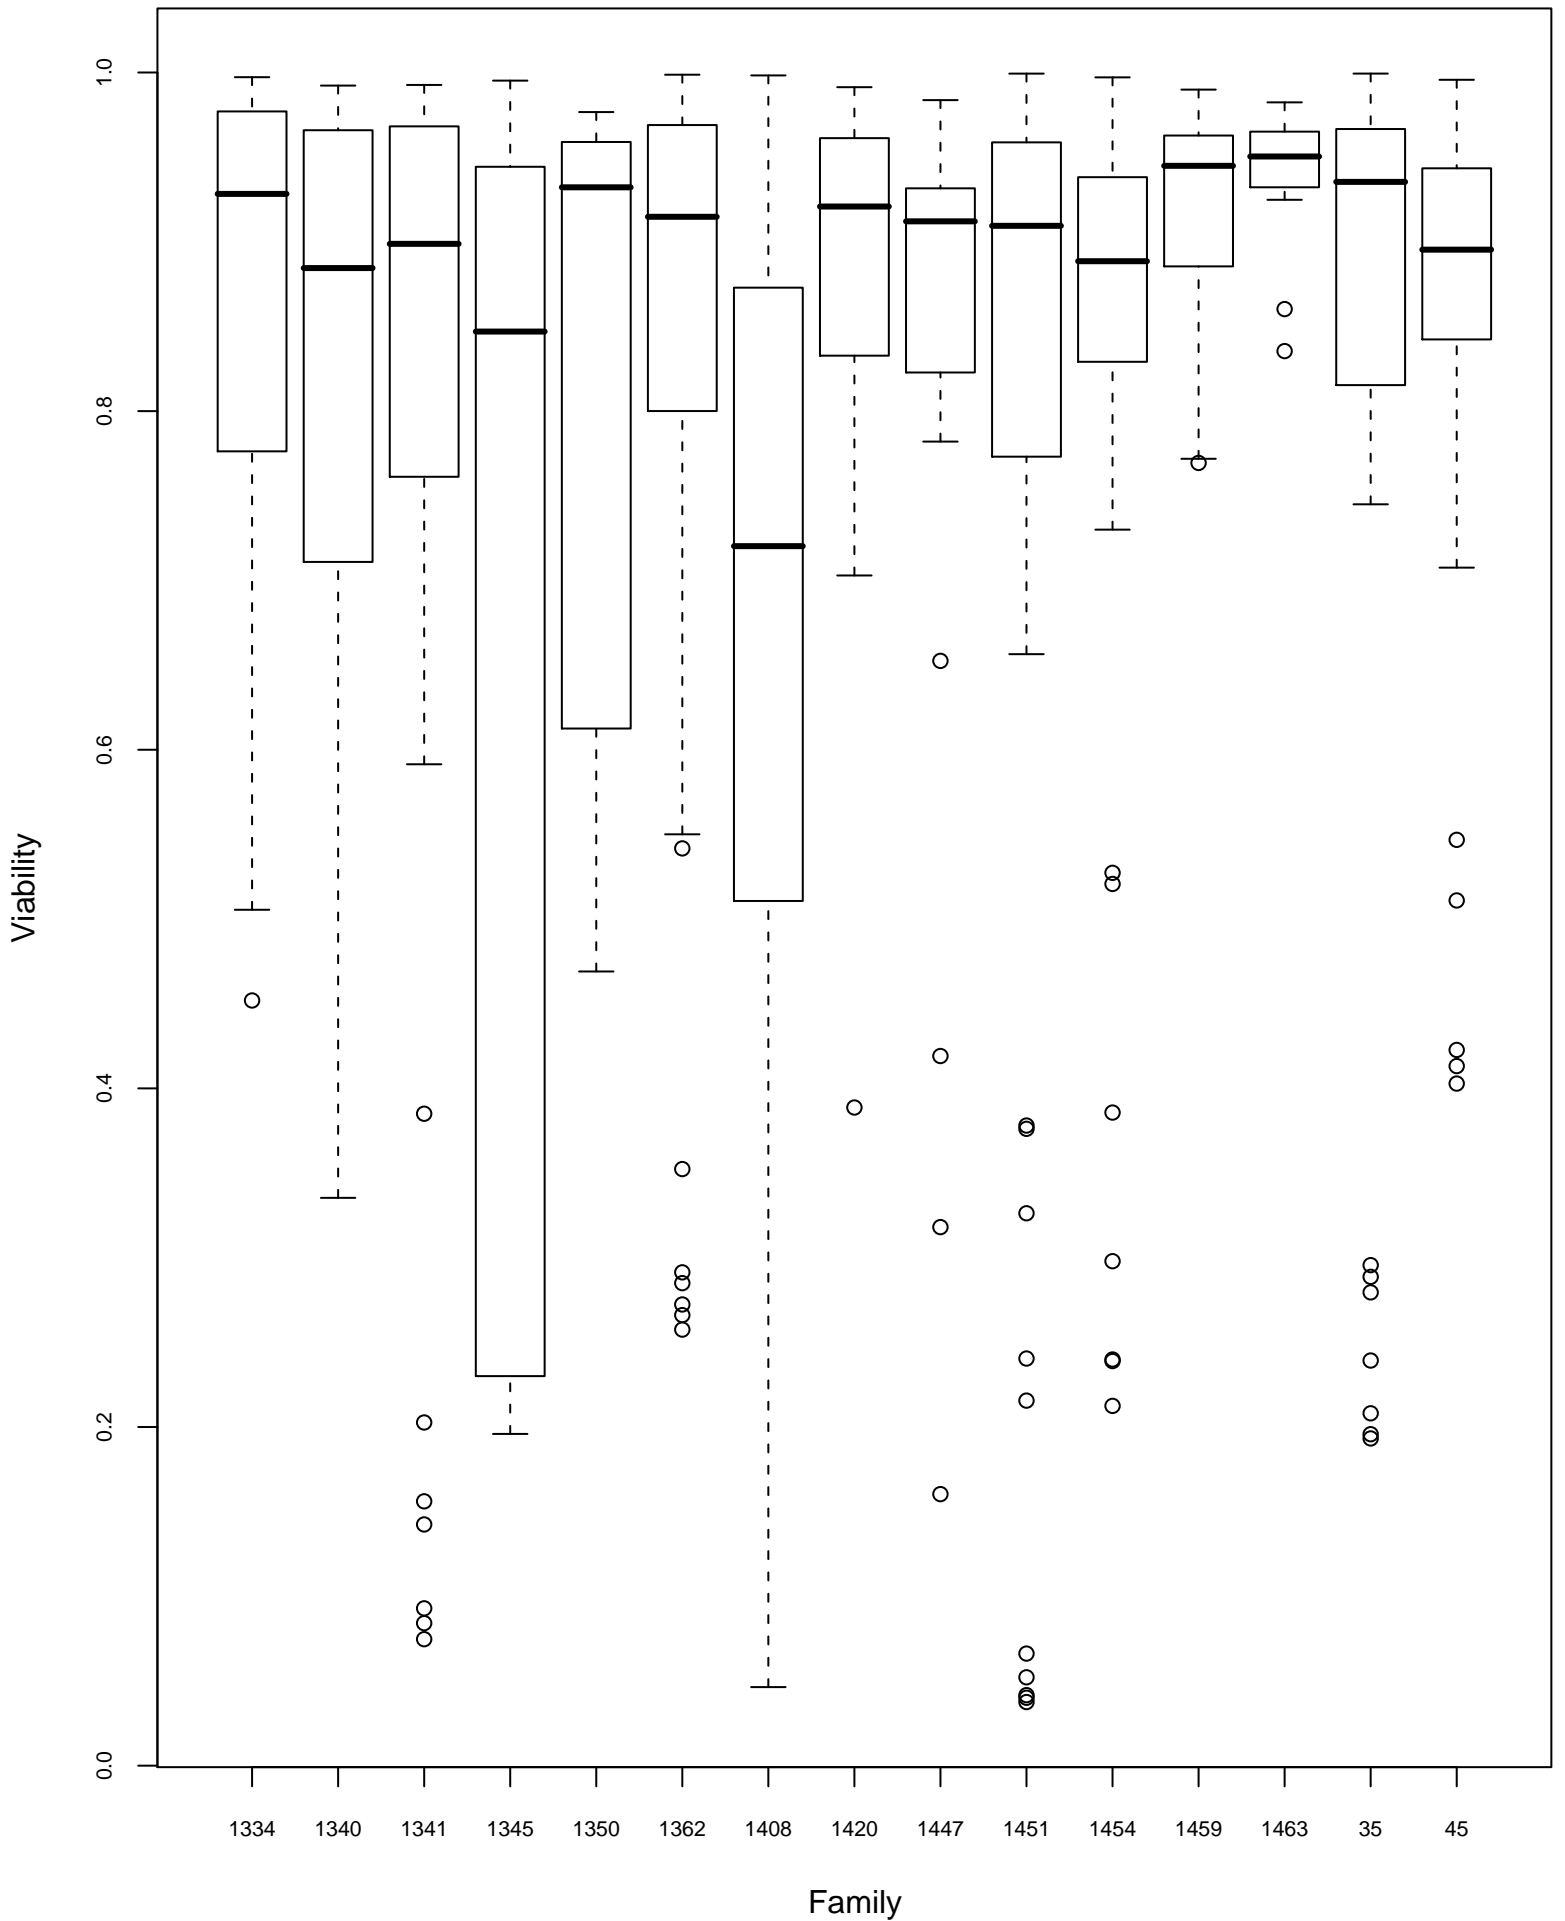

# Drug 85A1, dose 0.01 (mM)

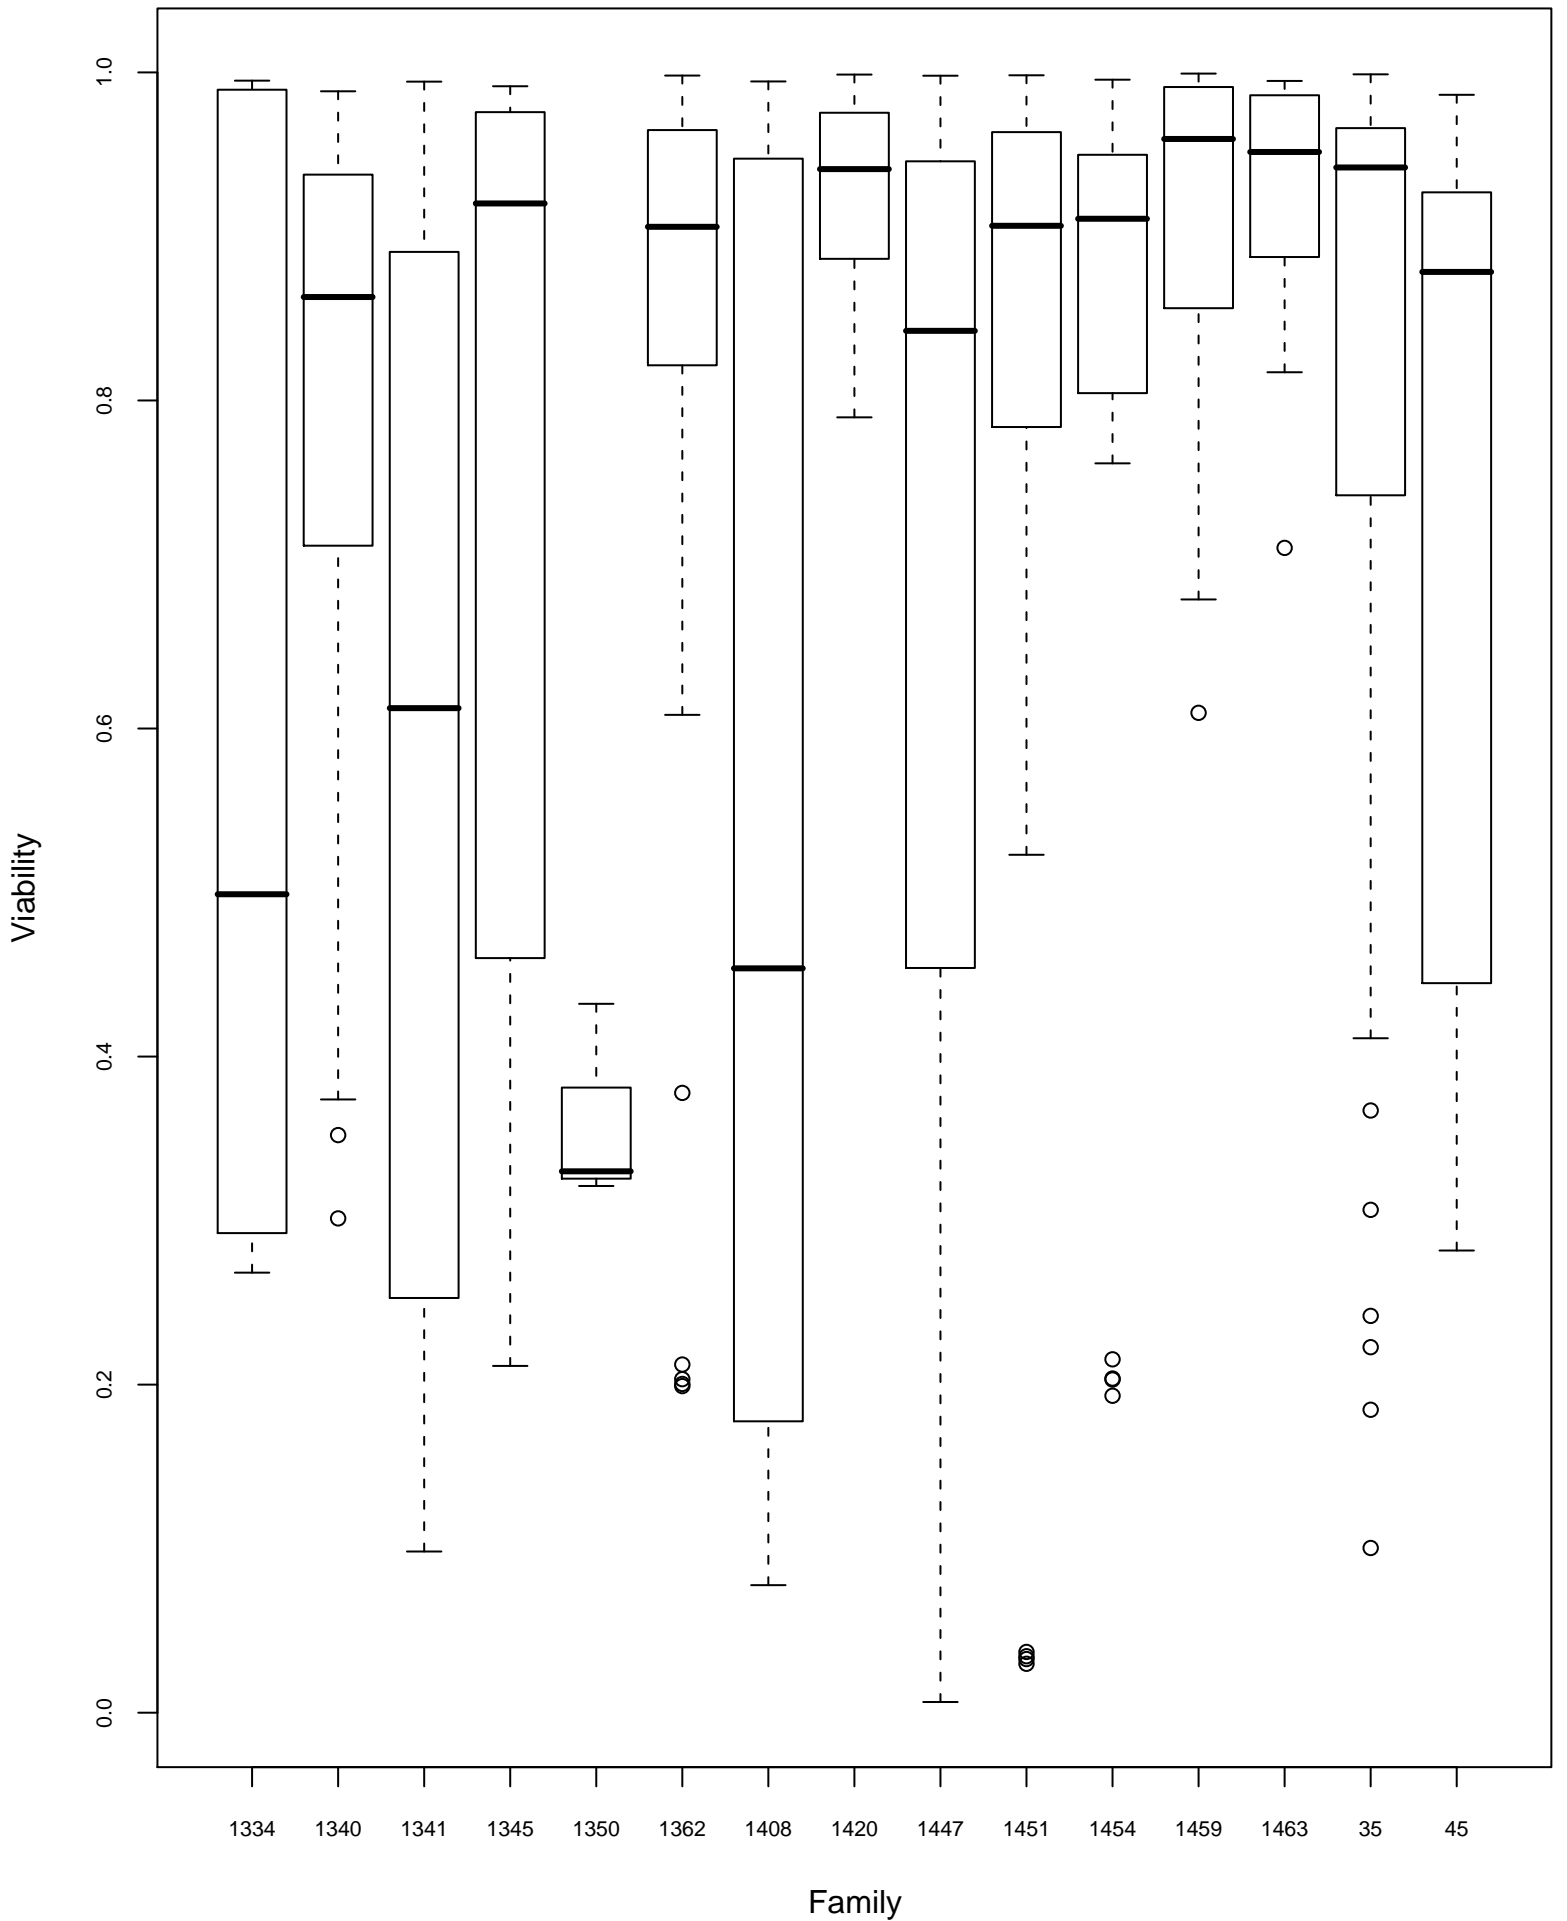

# Drug 86A1, dose 50.0 (mM)

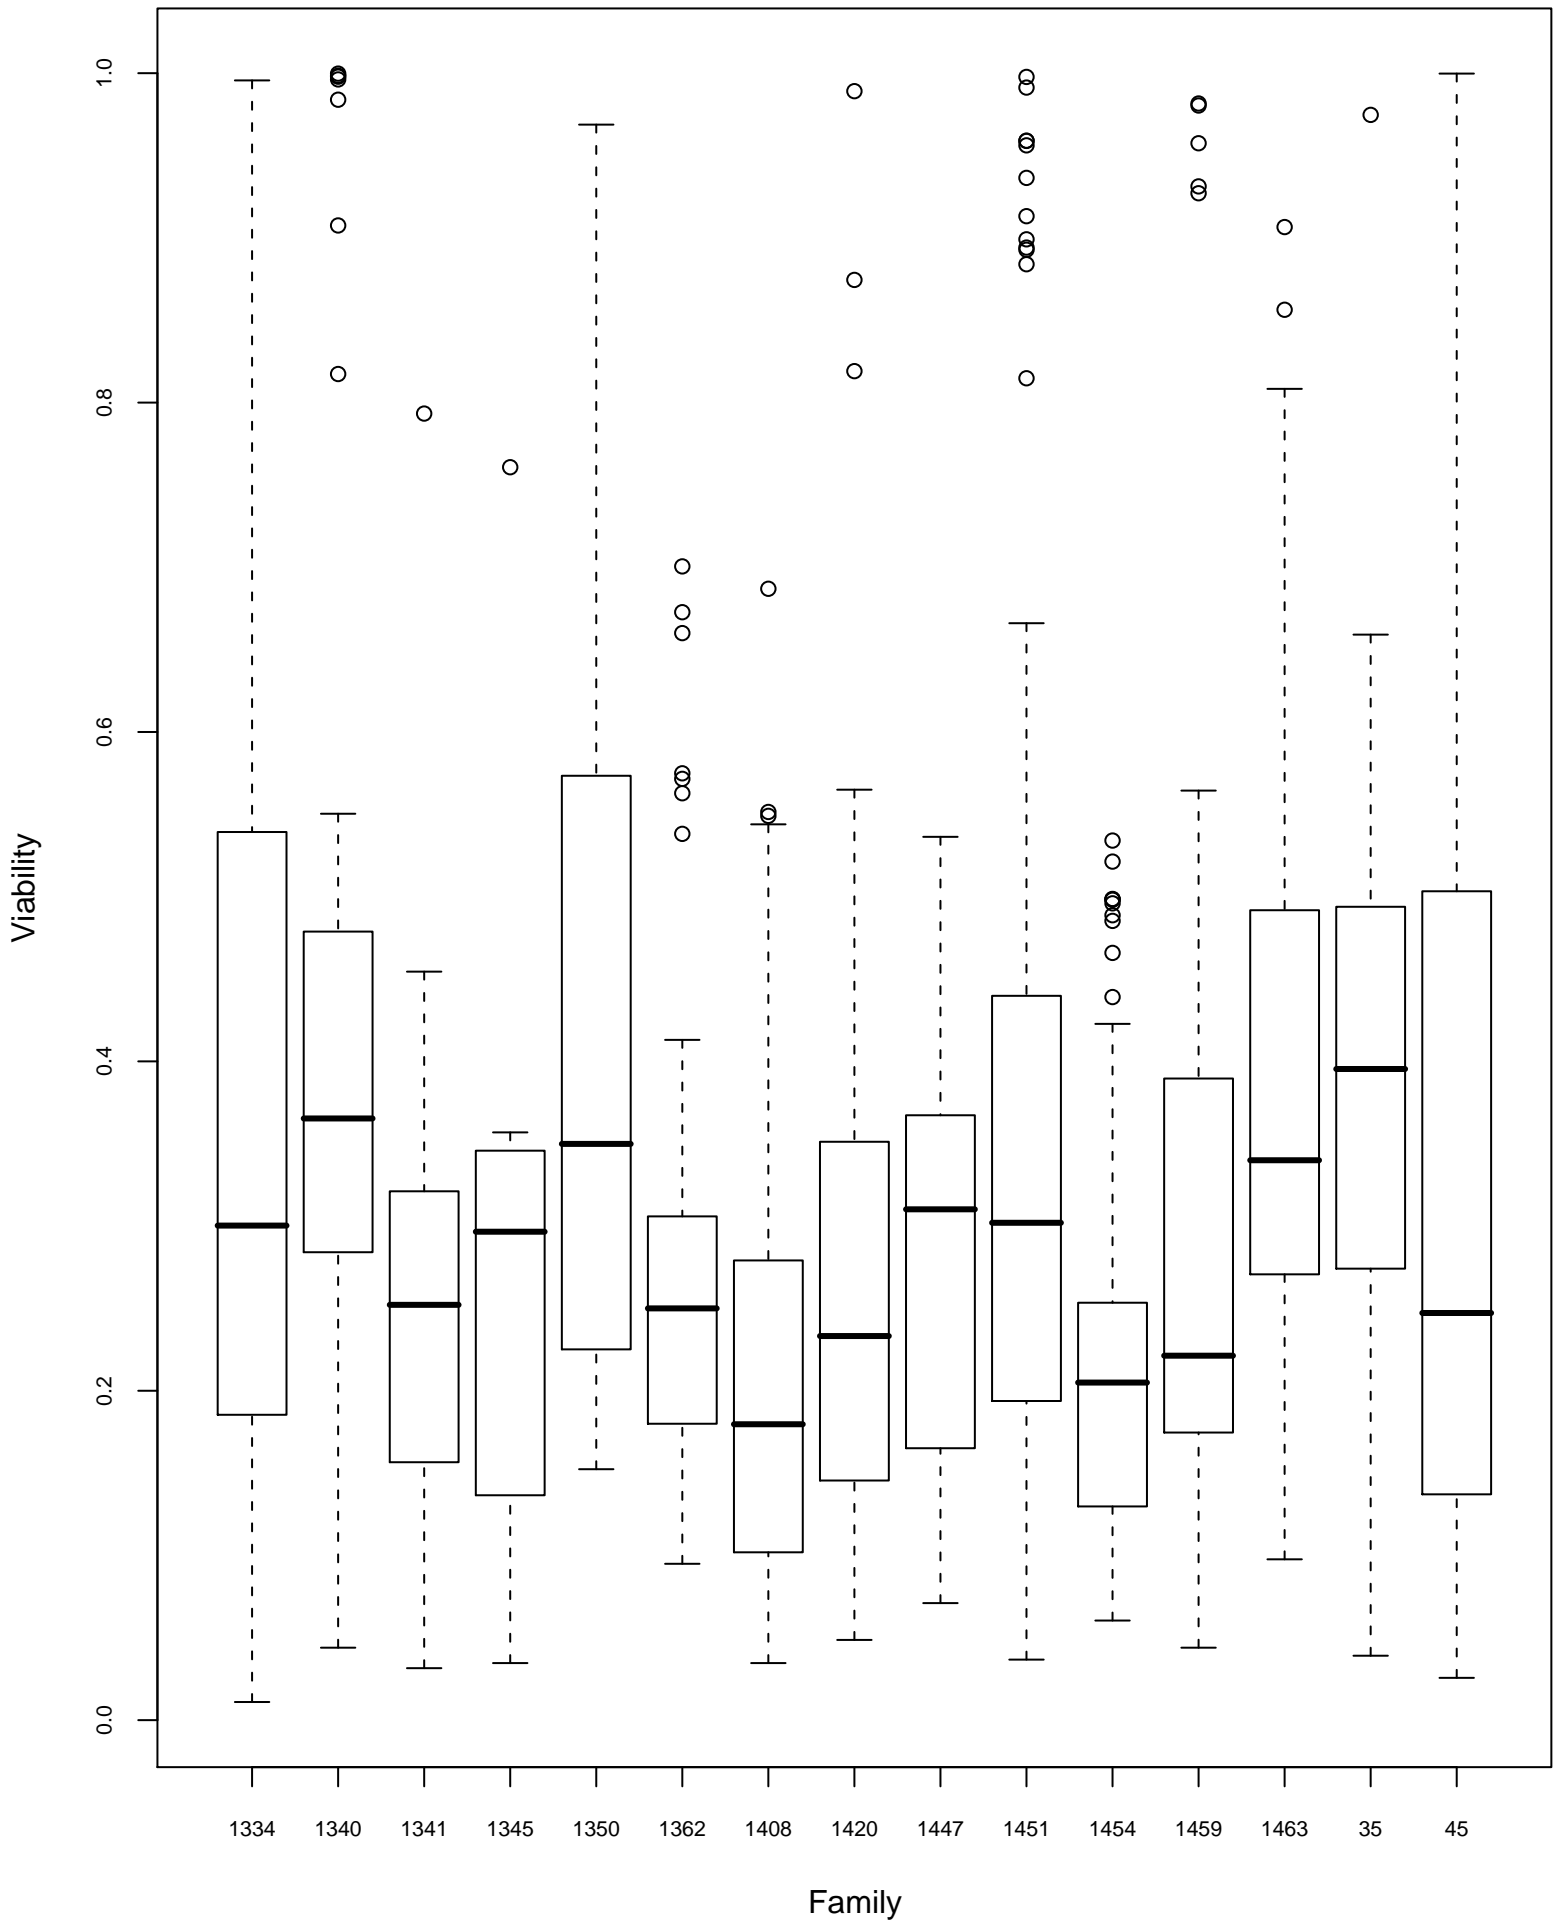

# Drug 86A1, dose 30.0 (mM)

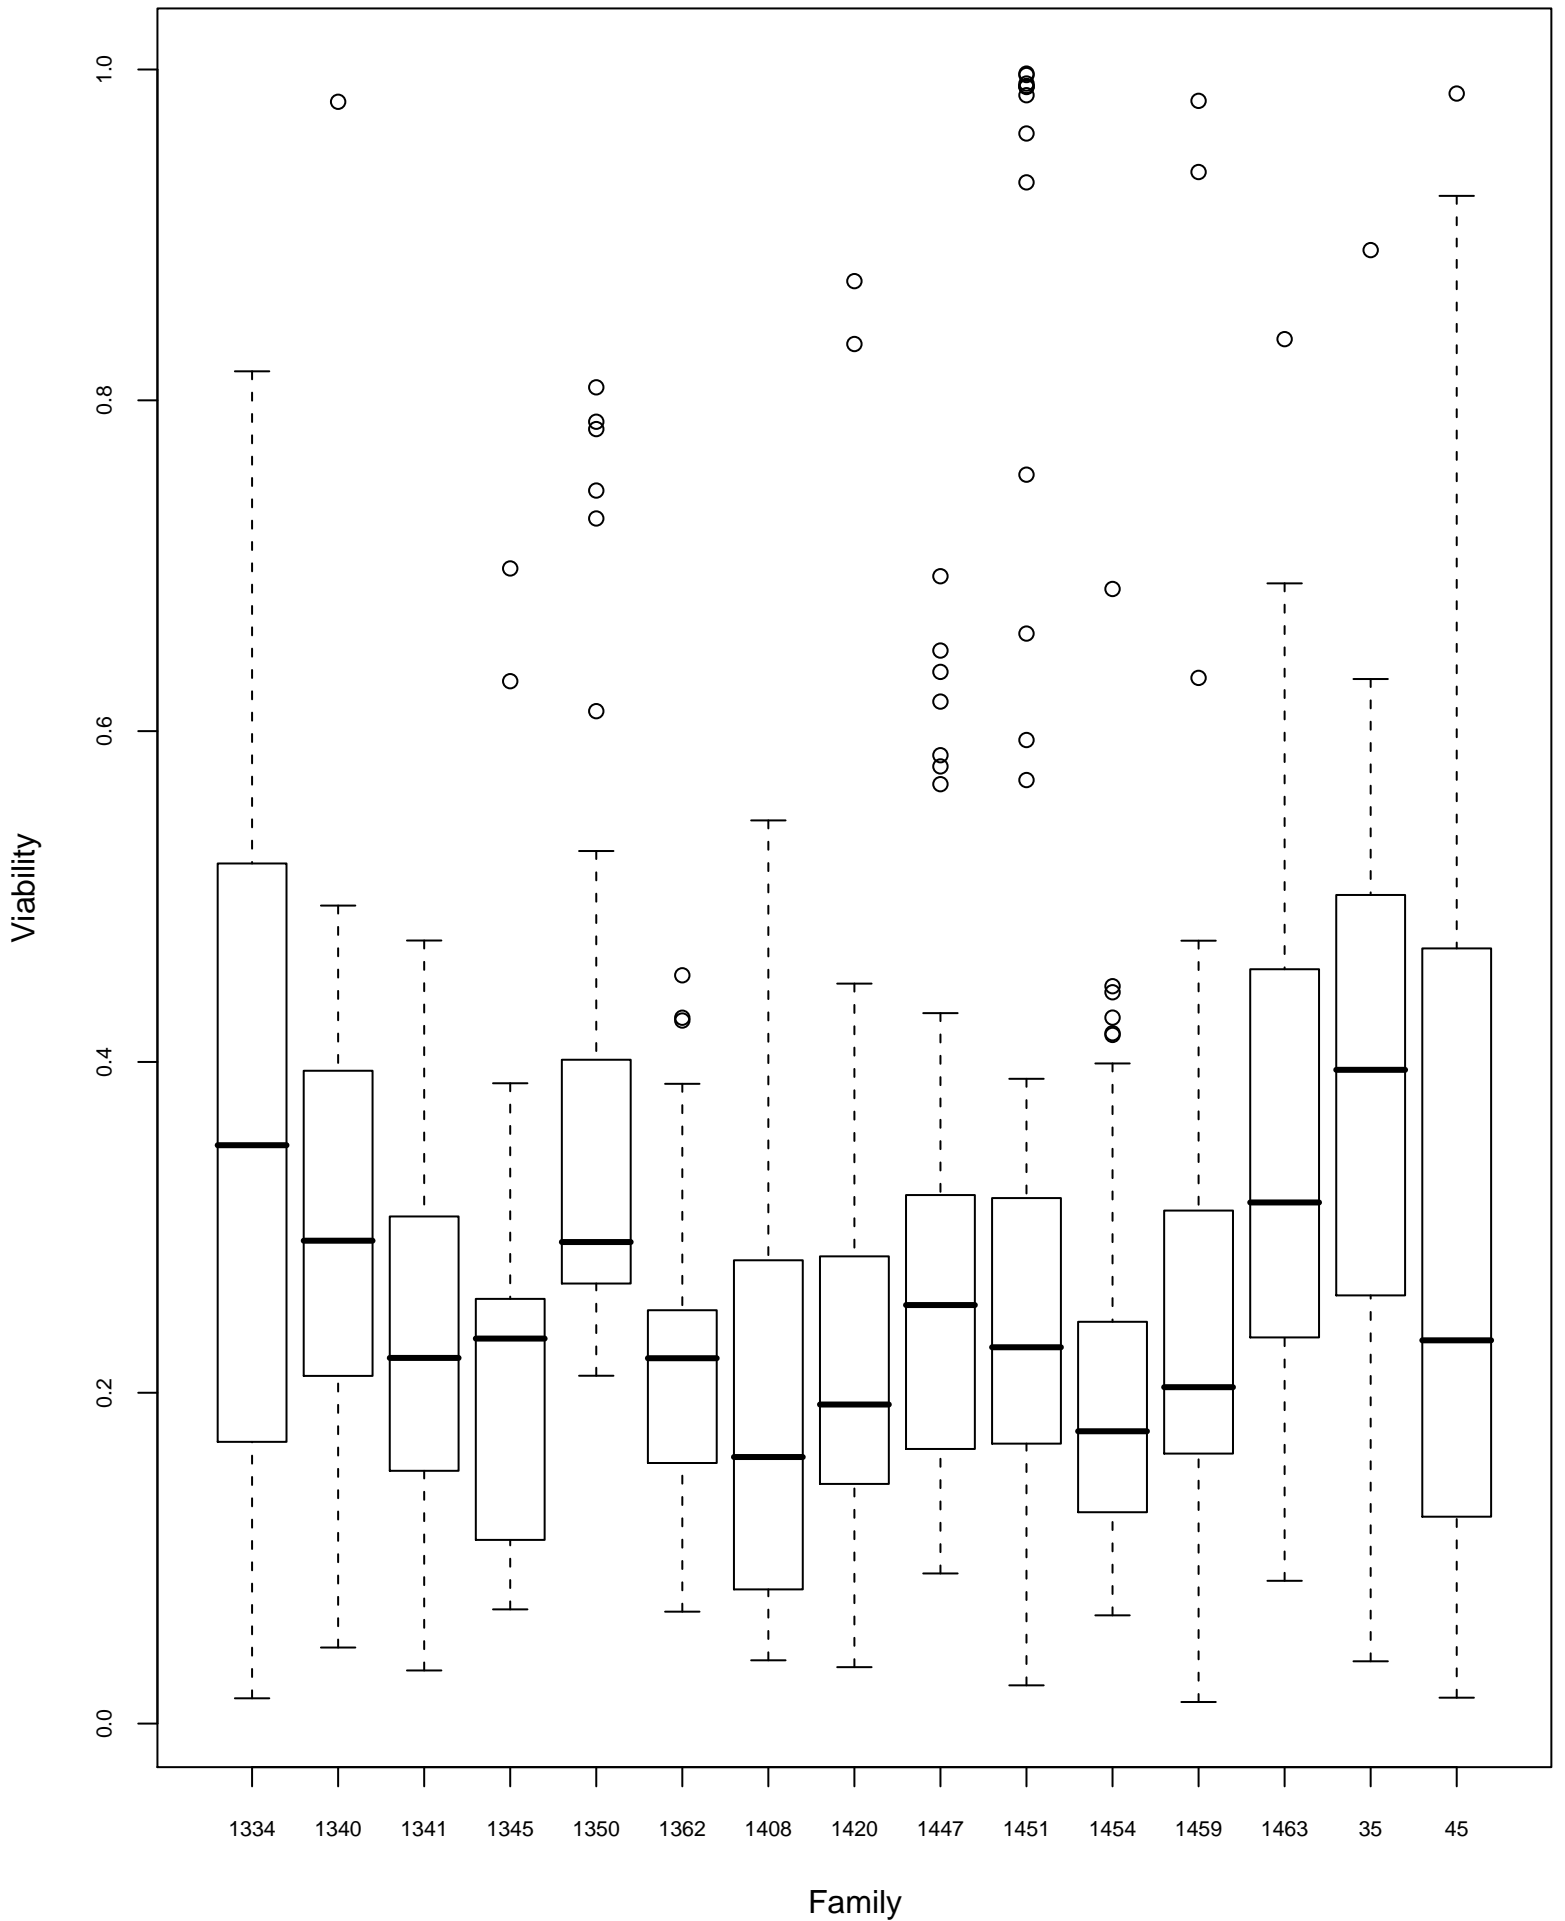

# Drug 86A1, dose 10.0 (mM)

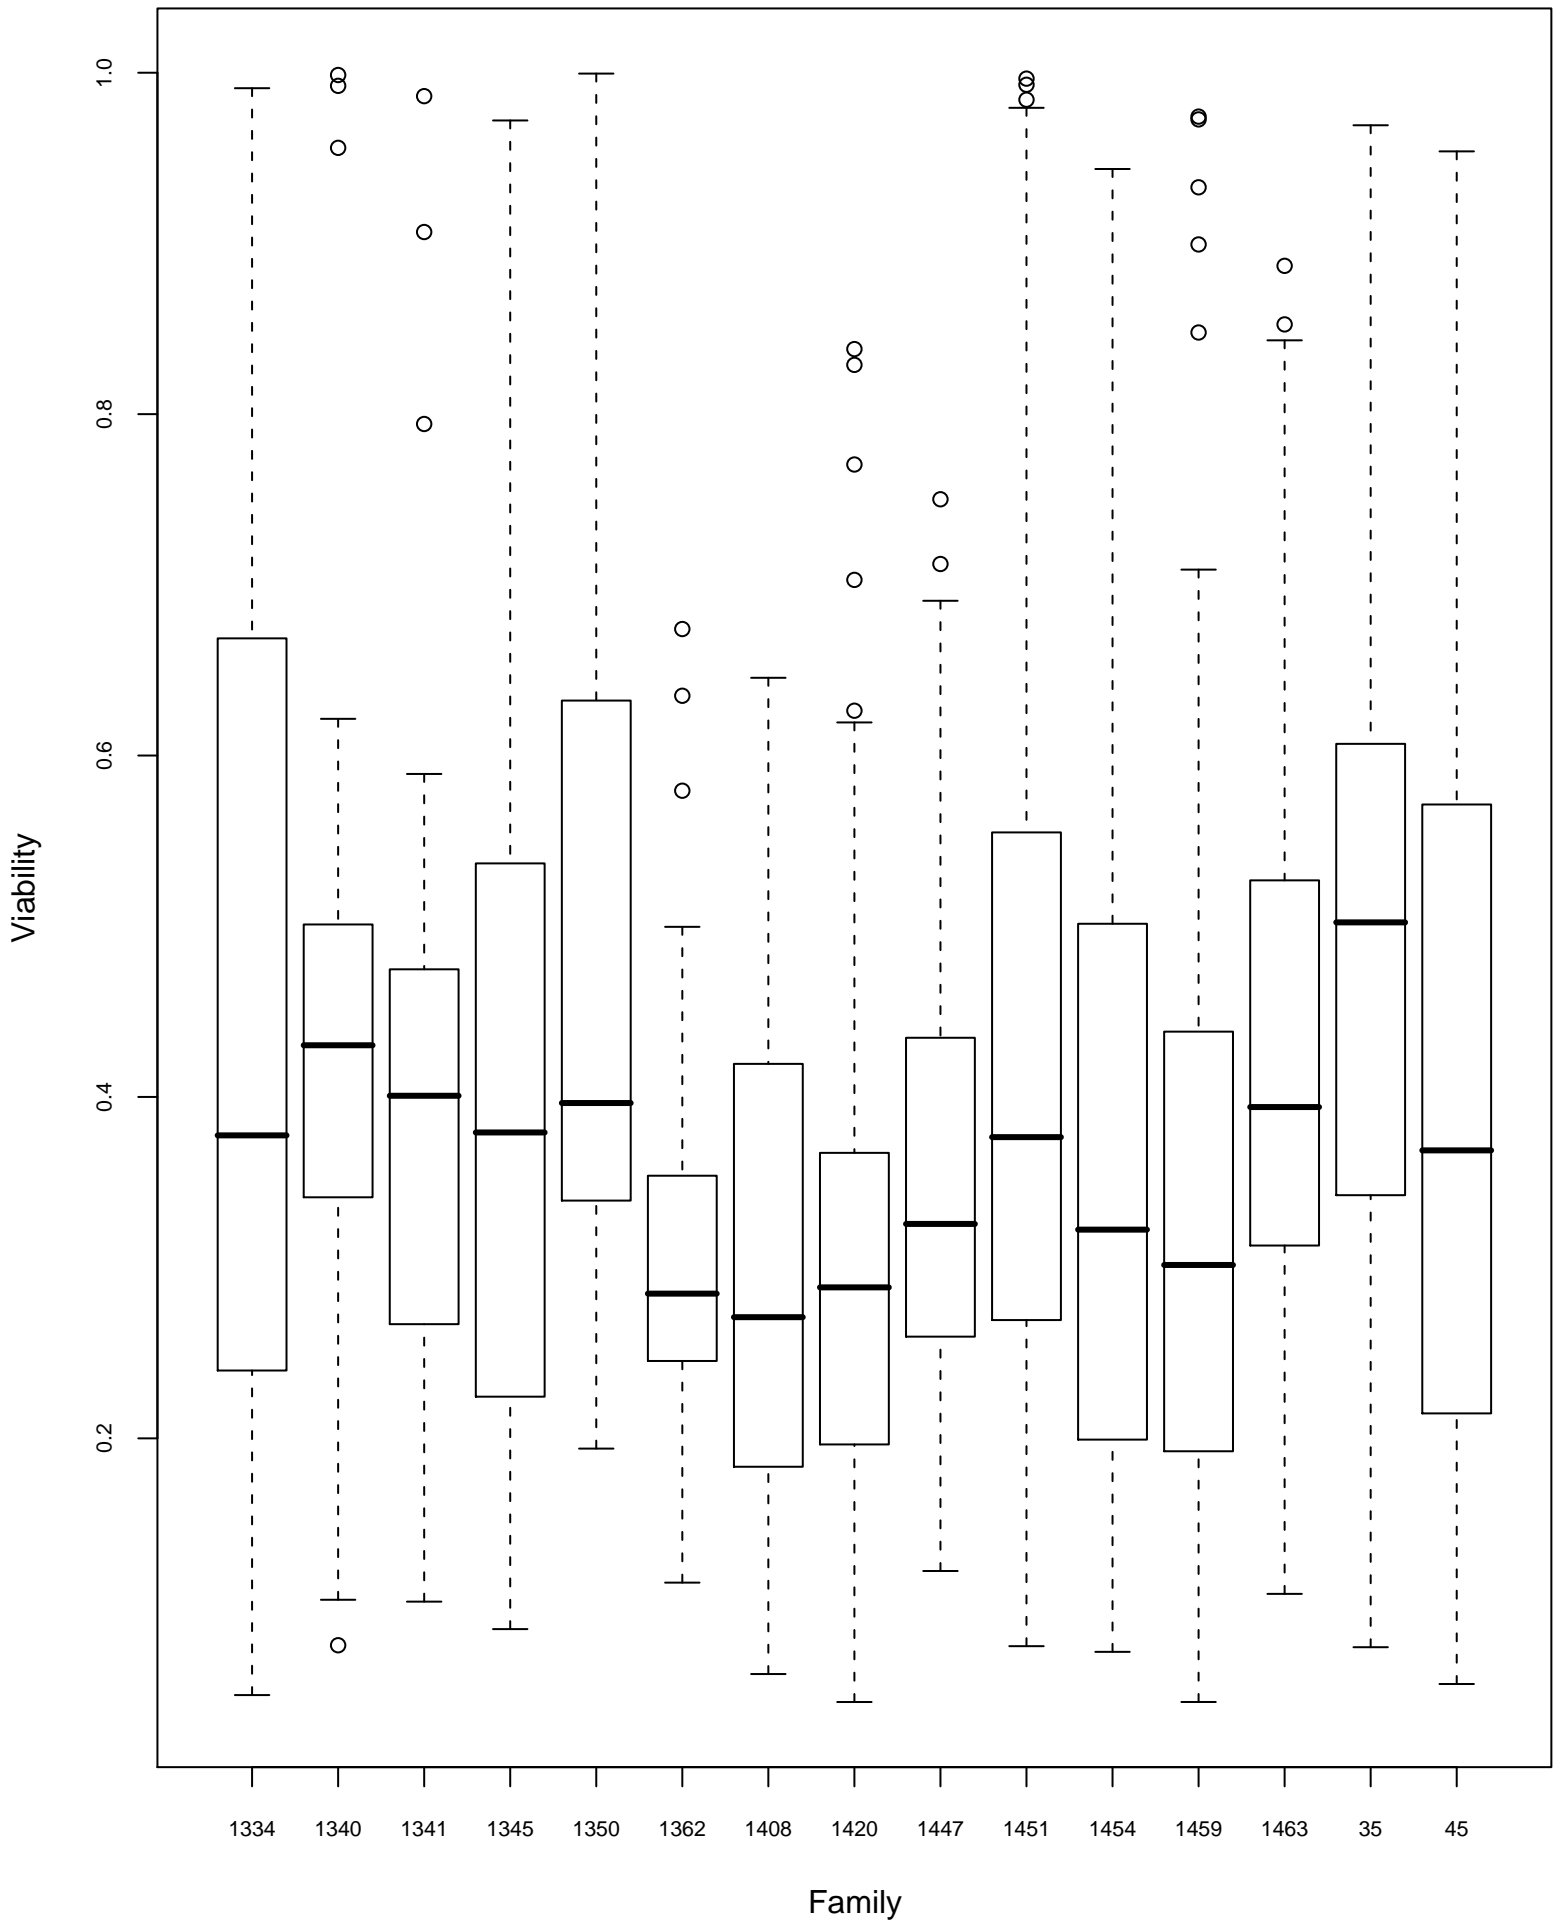



# Drug 86A1, dose 7.0 (mM)

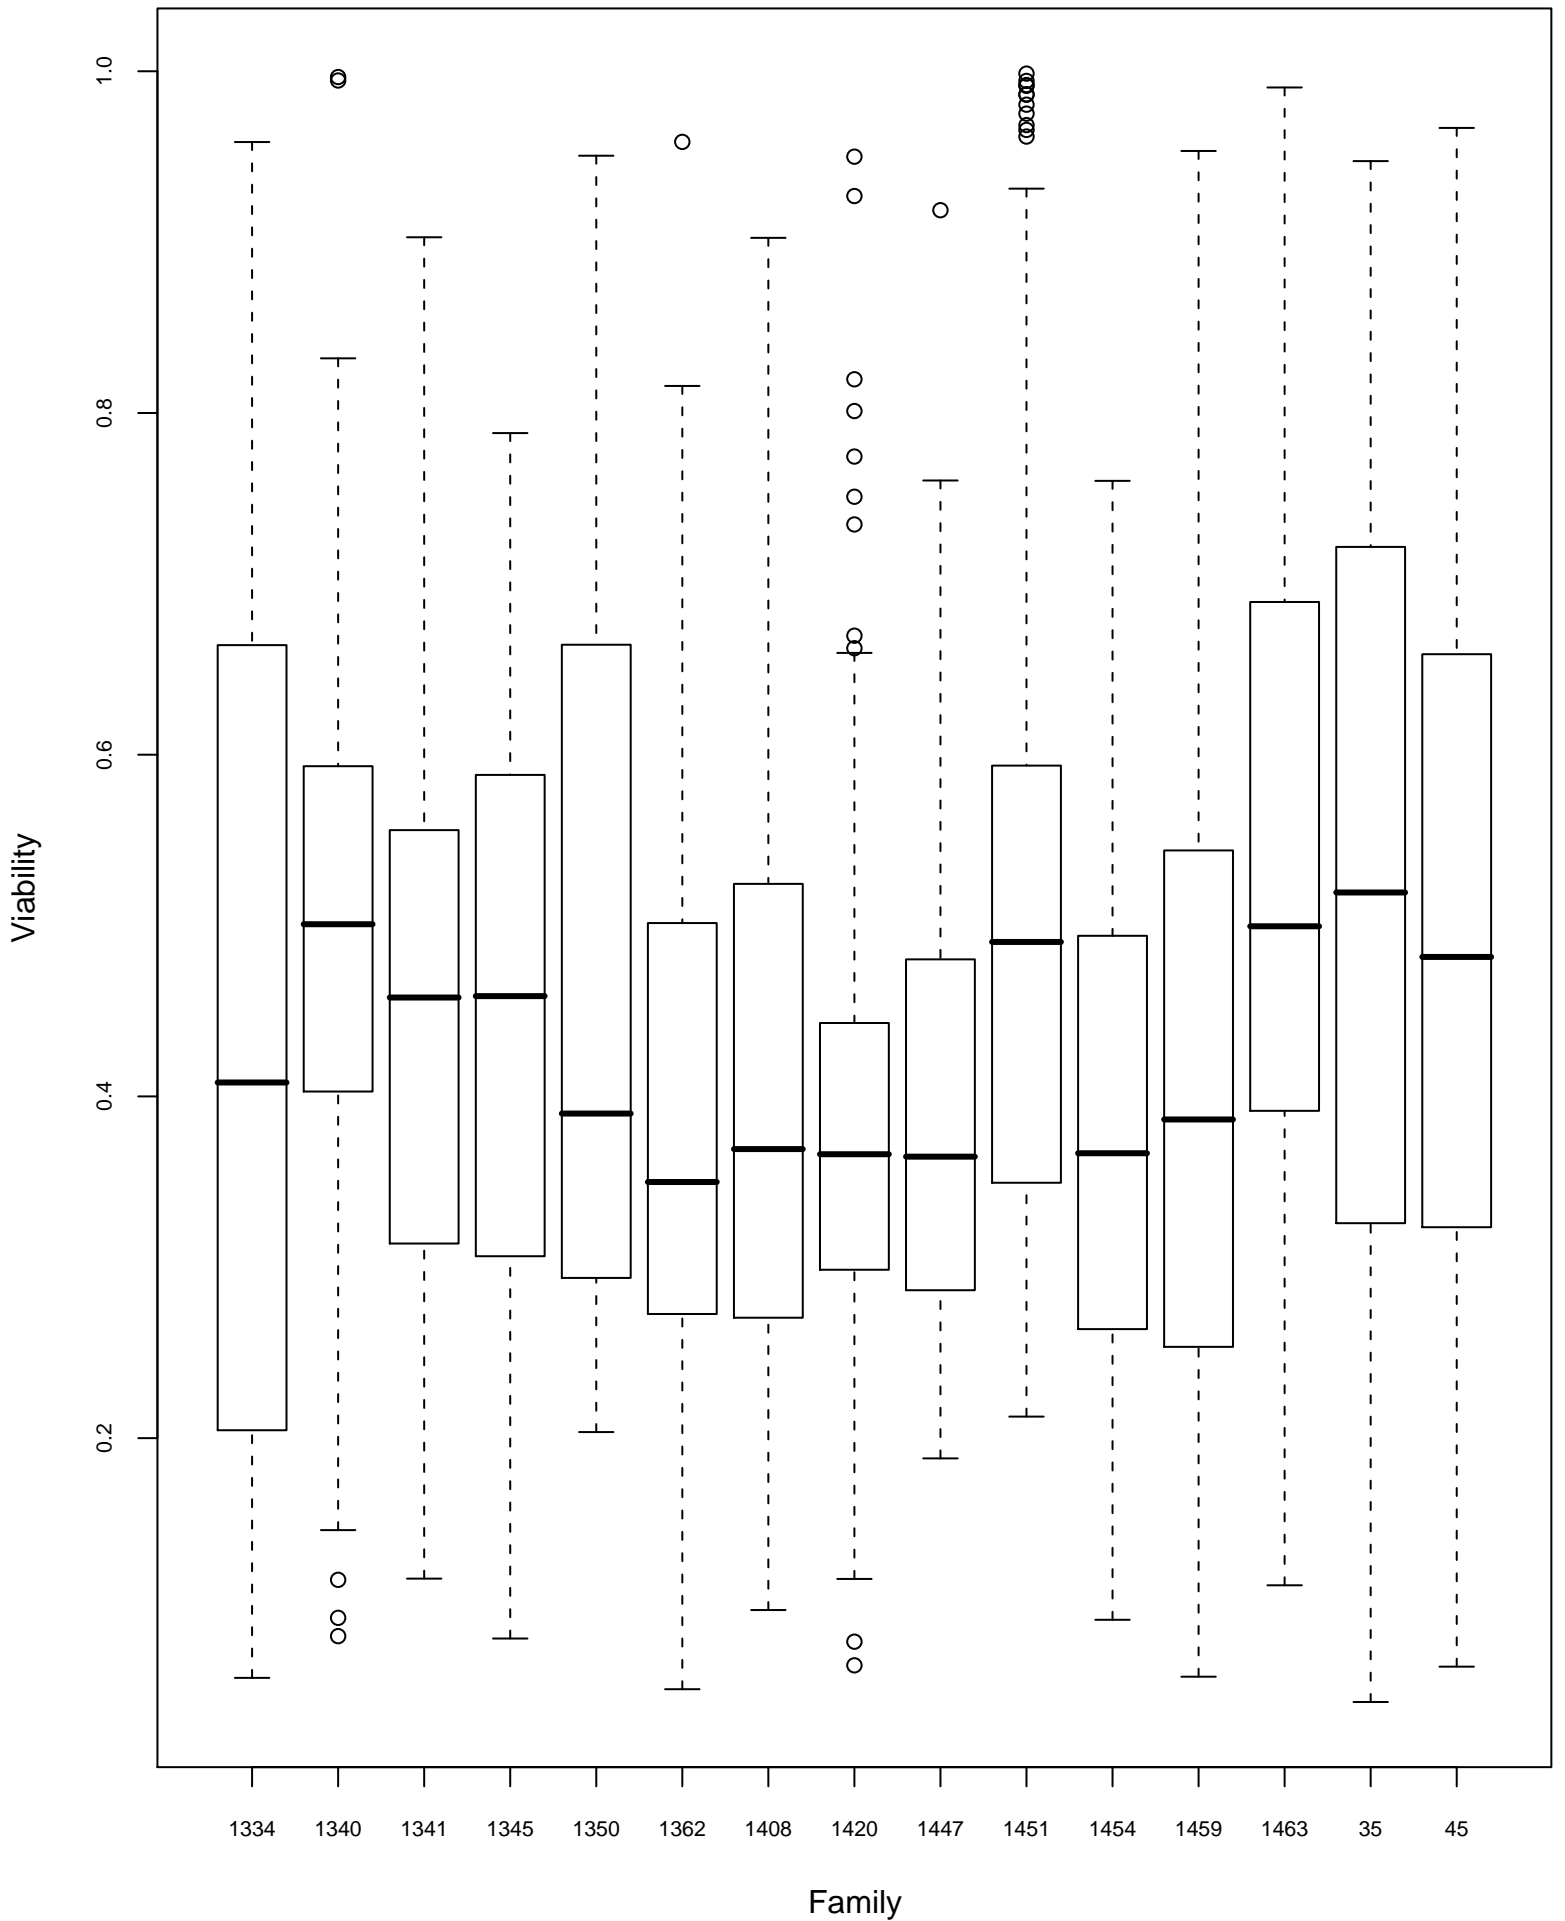

# Drug 86A1, dose 5.0 (mM)

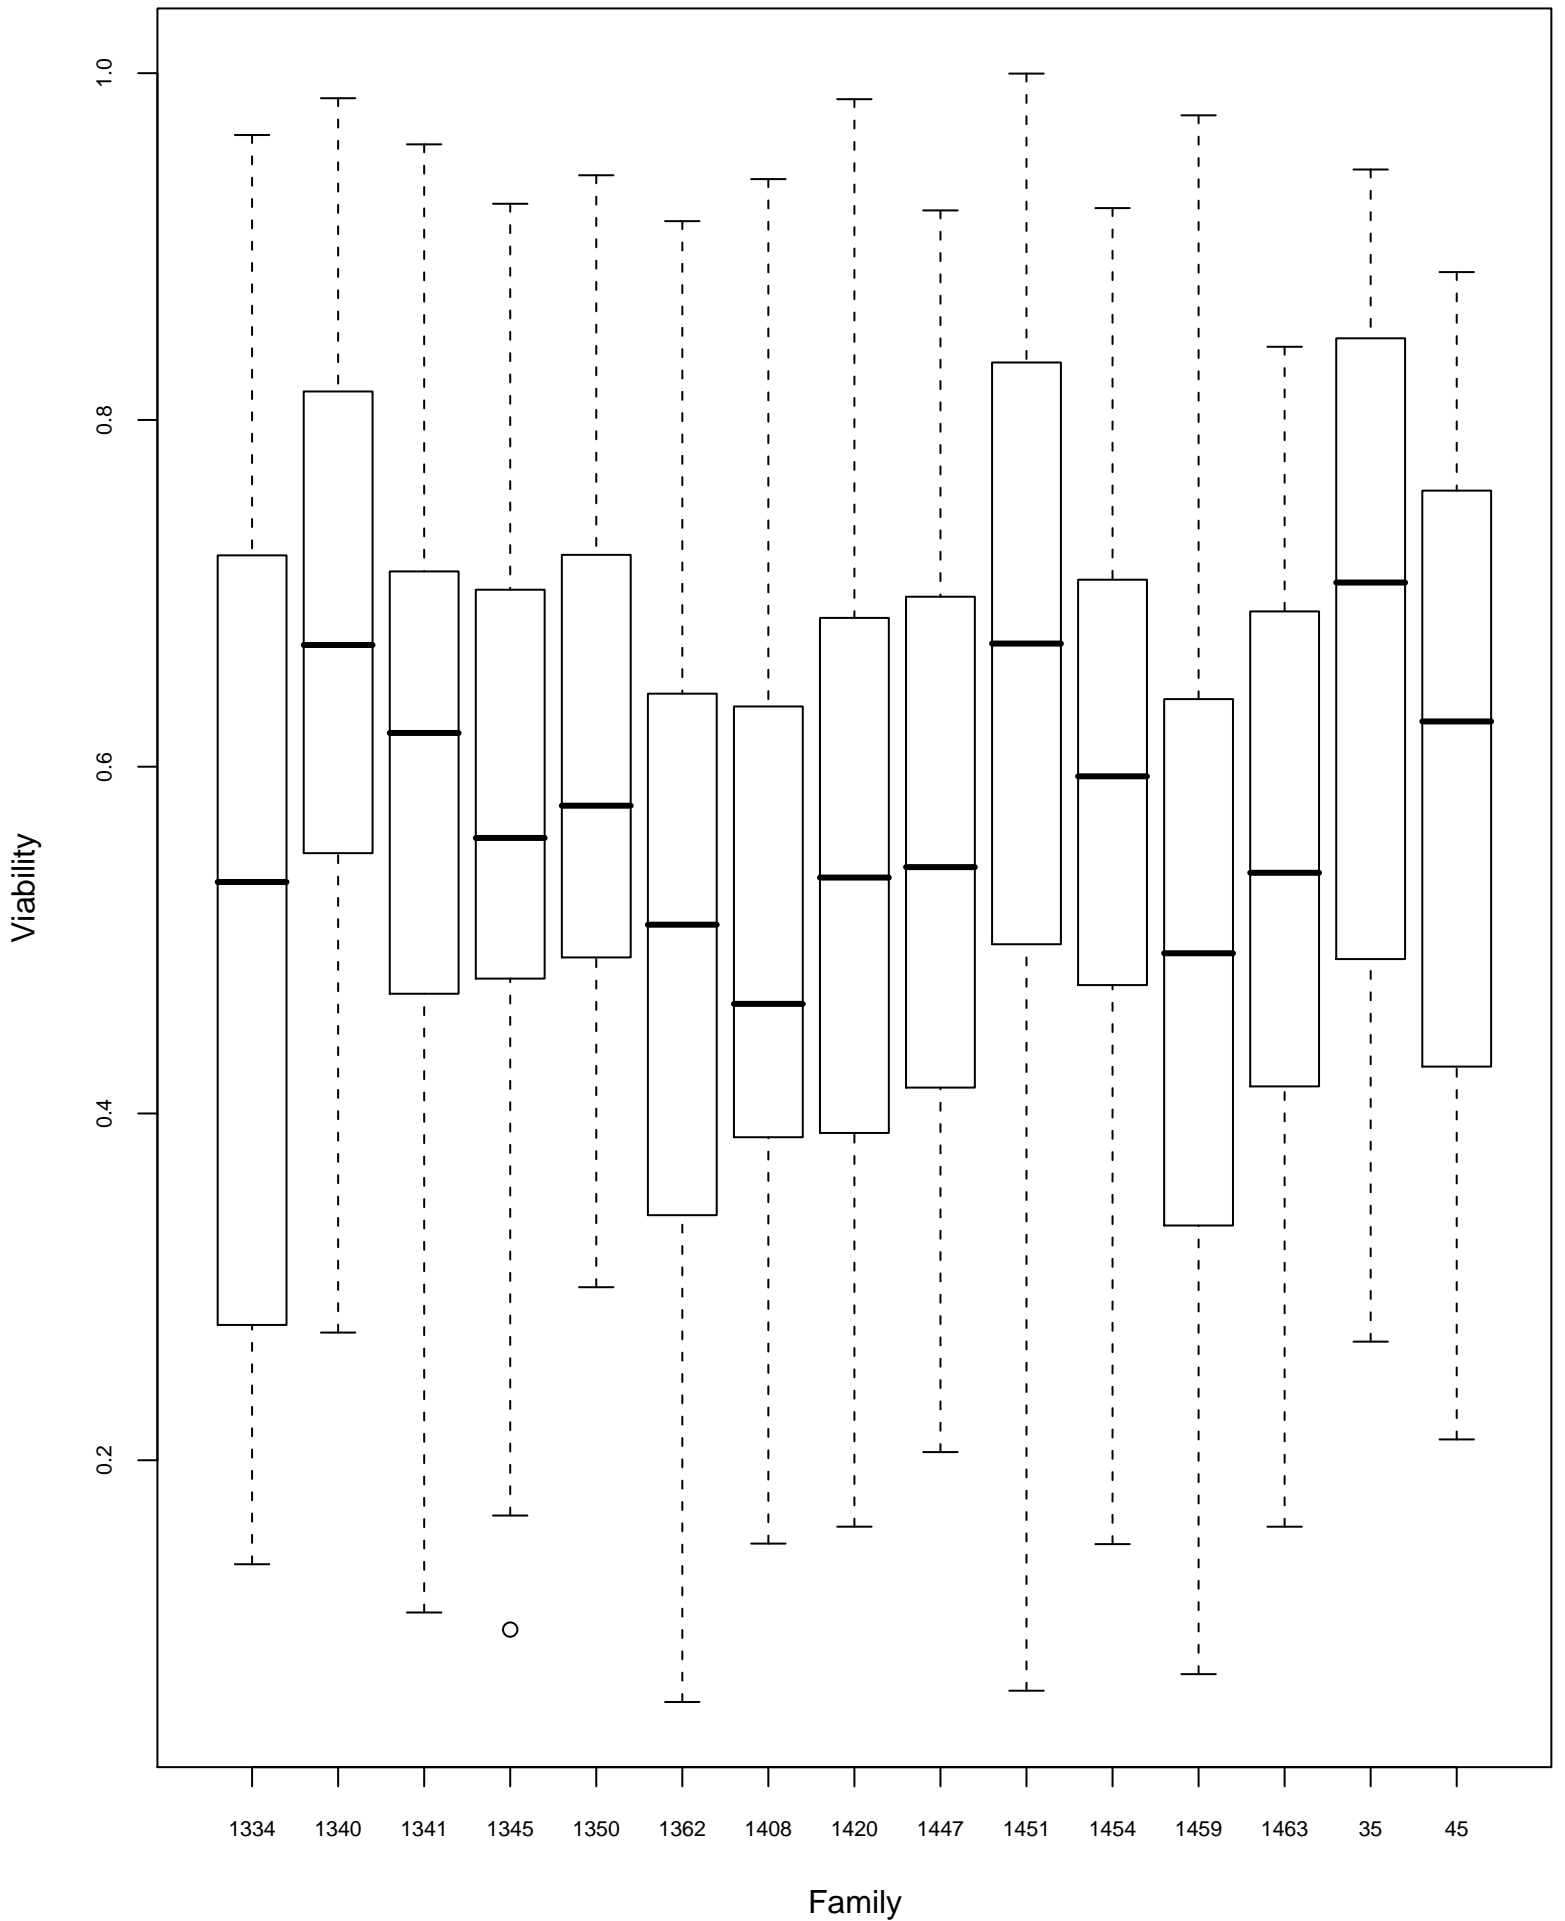

# Drug 86A1, dose 3.0 (mM)

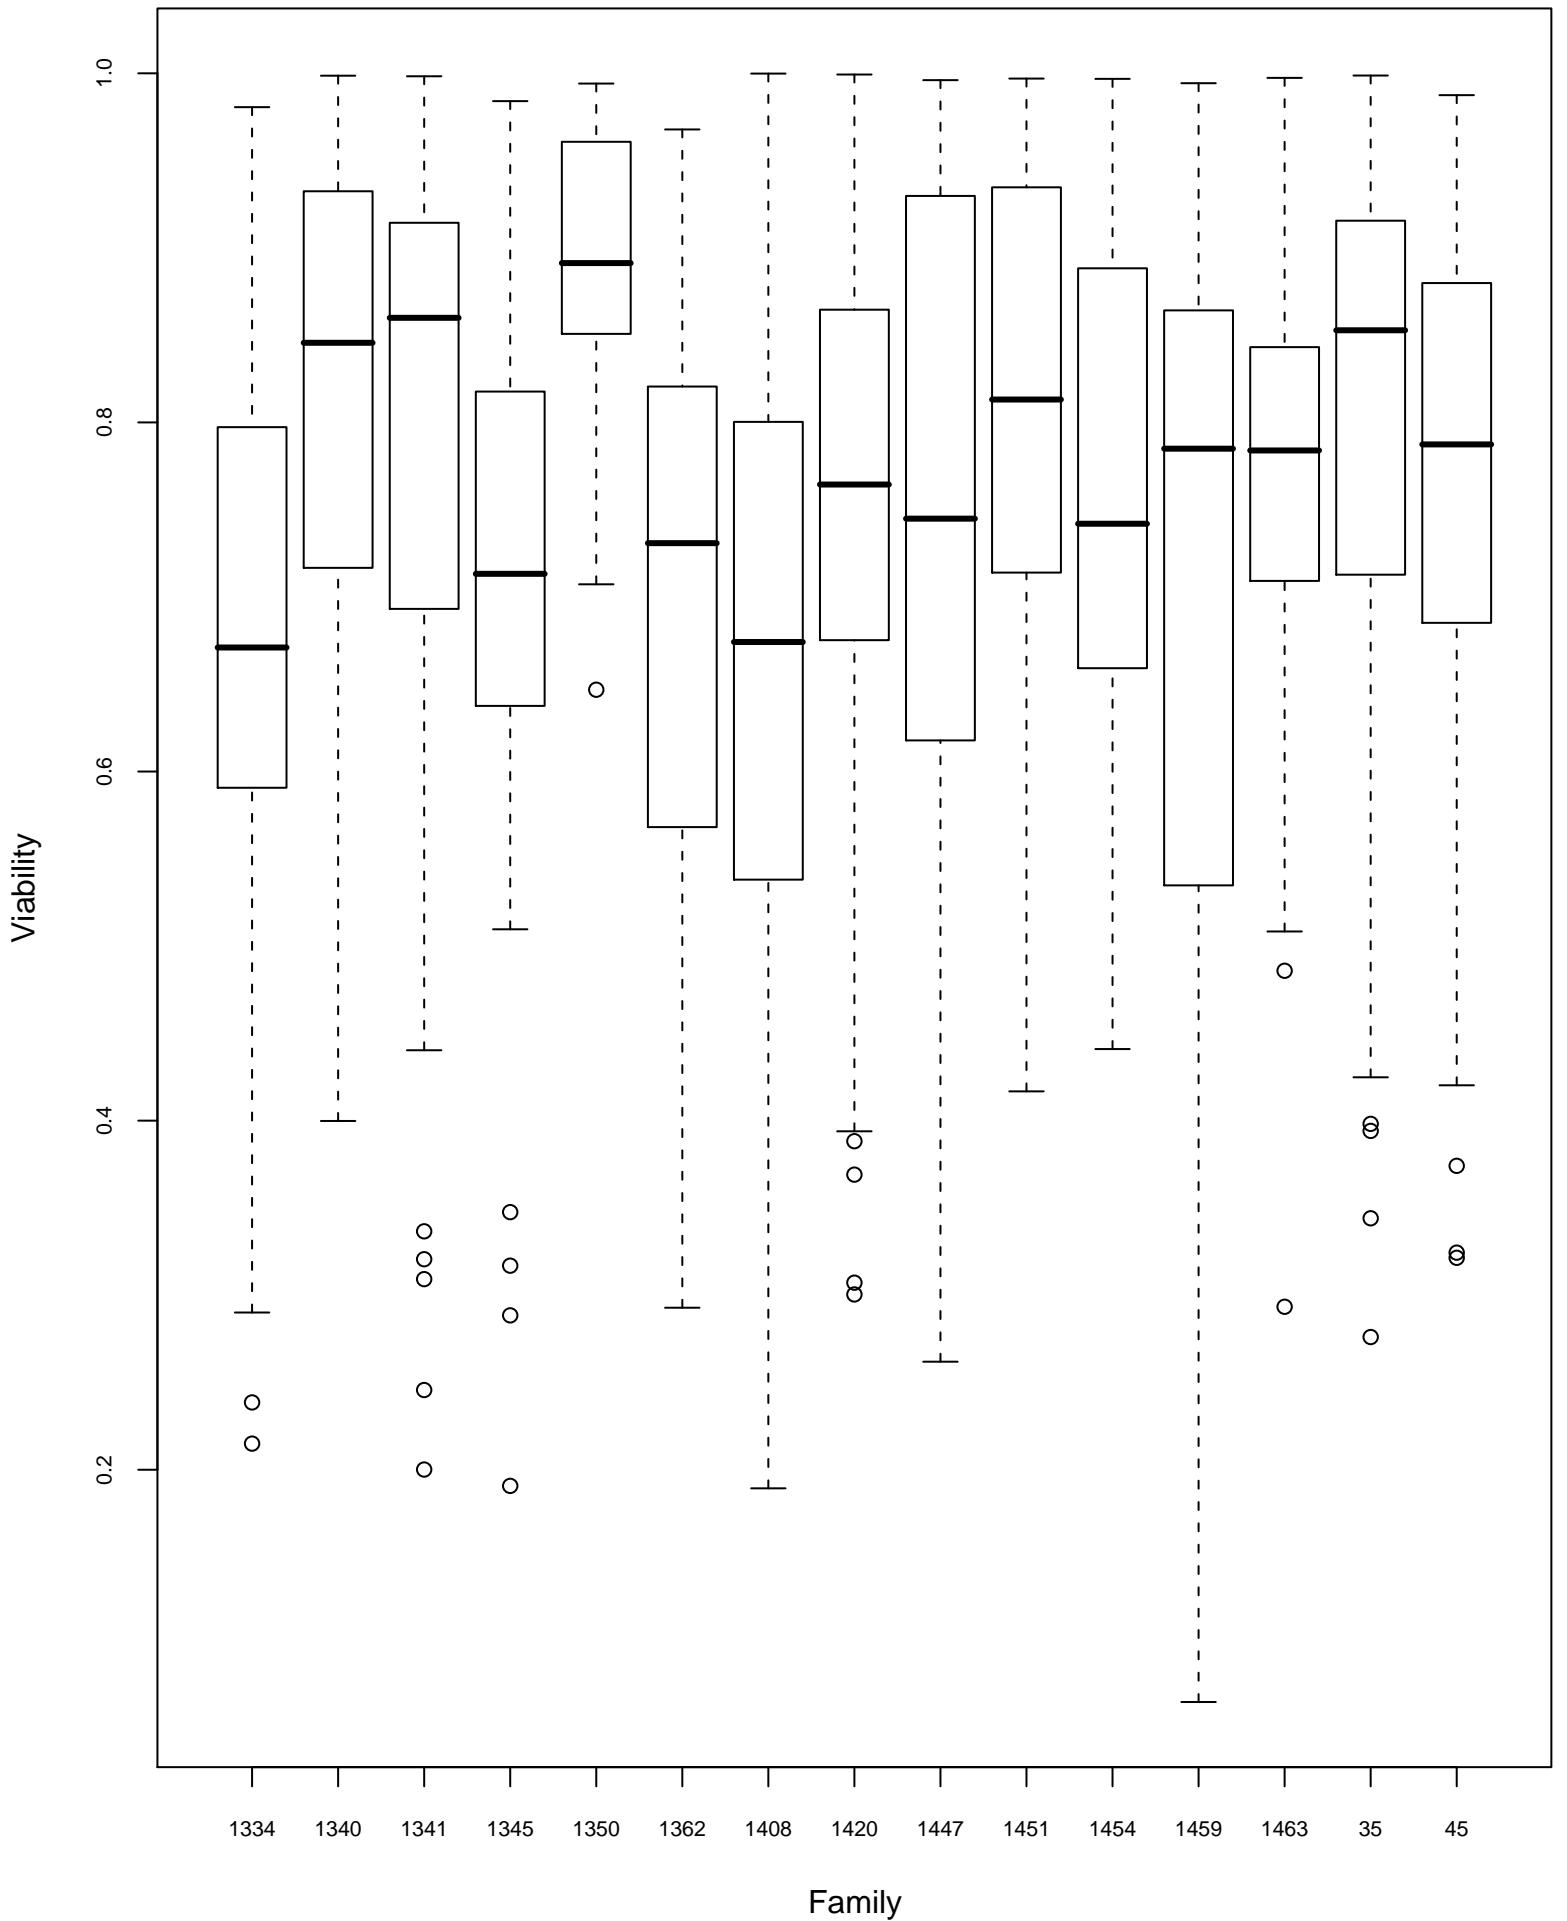

# Drug 86A1, dose 1.0 (mM)

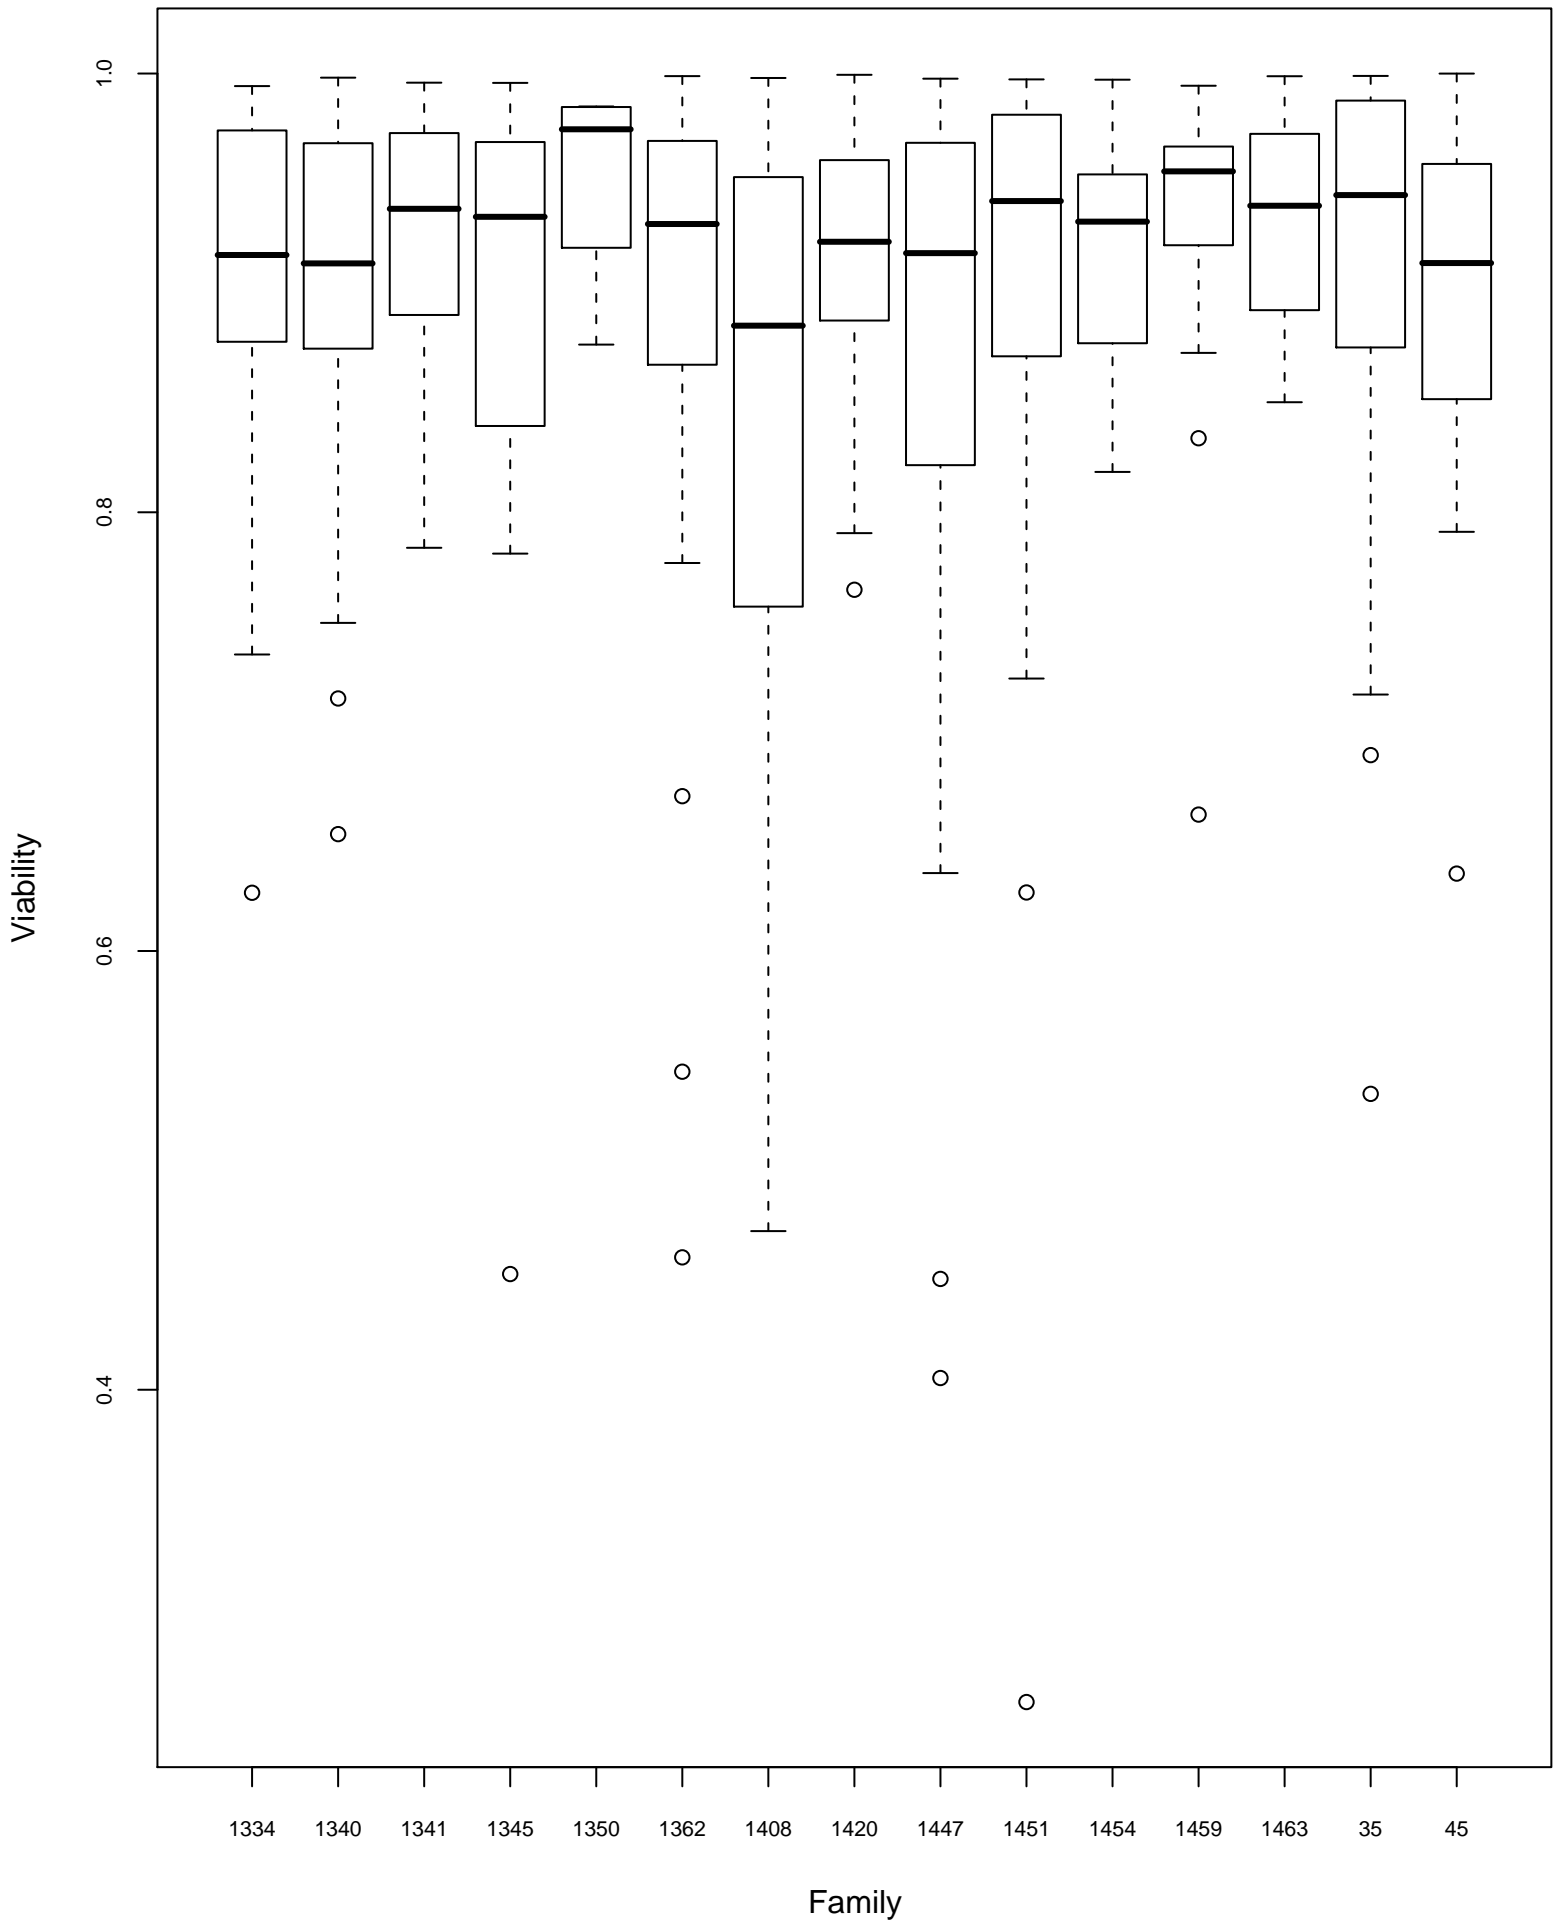

# Drug 86A1, dose 0.01 (mM)

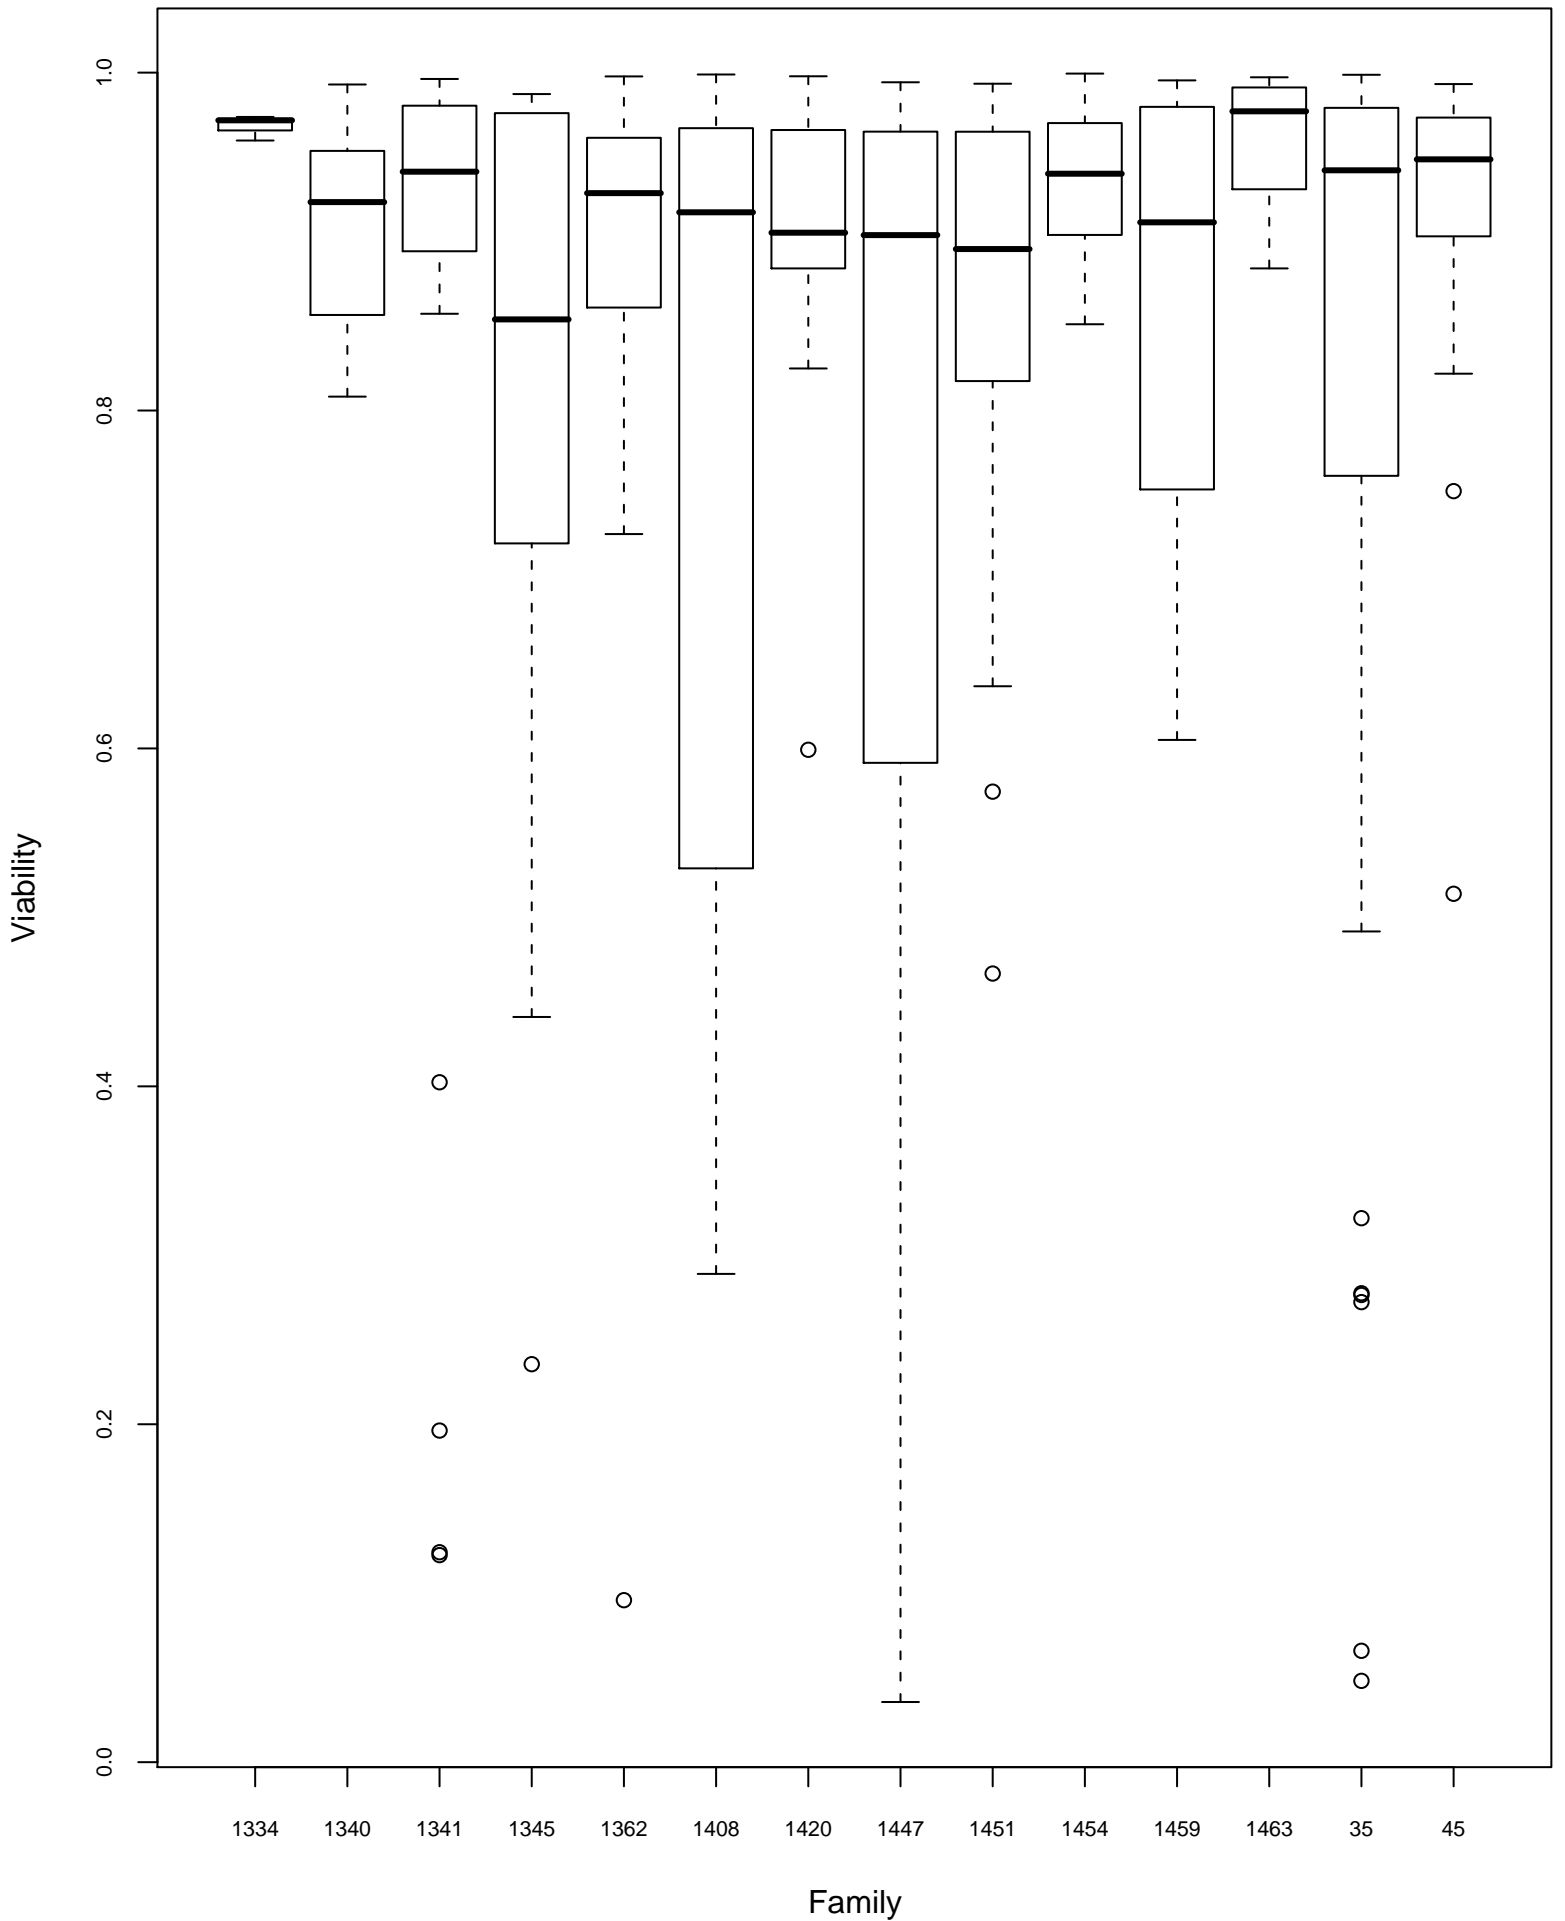

**Supplemental Dataset 3.** Genomewide QTL maps for each drug. For each compound-concentration combination, LOD scores are shown across each chromosome. QTL maps for different concentrations of the same compound are overlaid. Drug abbreviations are as follows: Indenoisoquinoline 1 = 84A1, Indenoisoquinoline 2 = 85A1, and Indenoisoquinoline 3 = 86A1.

# 84A1 (84A1)

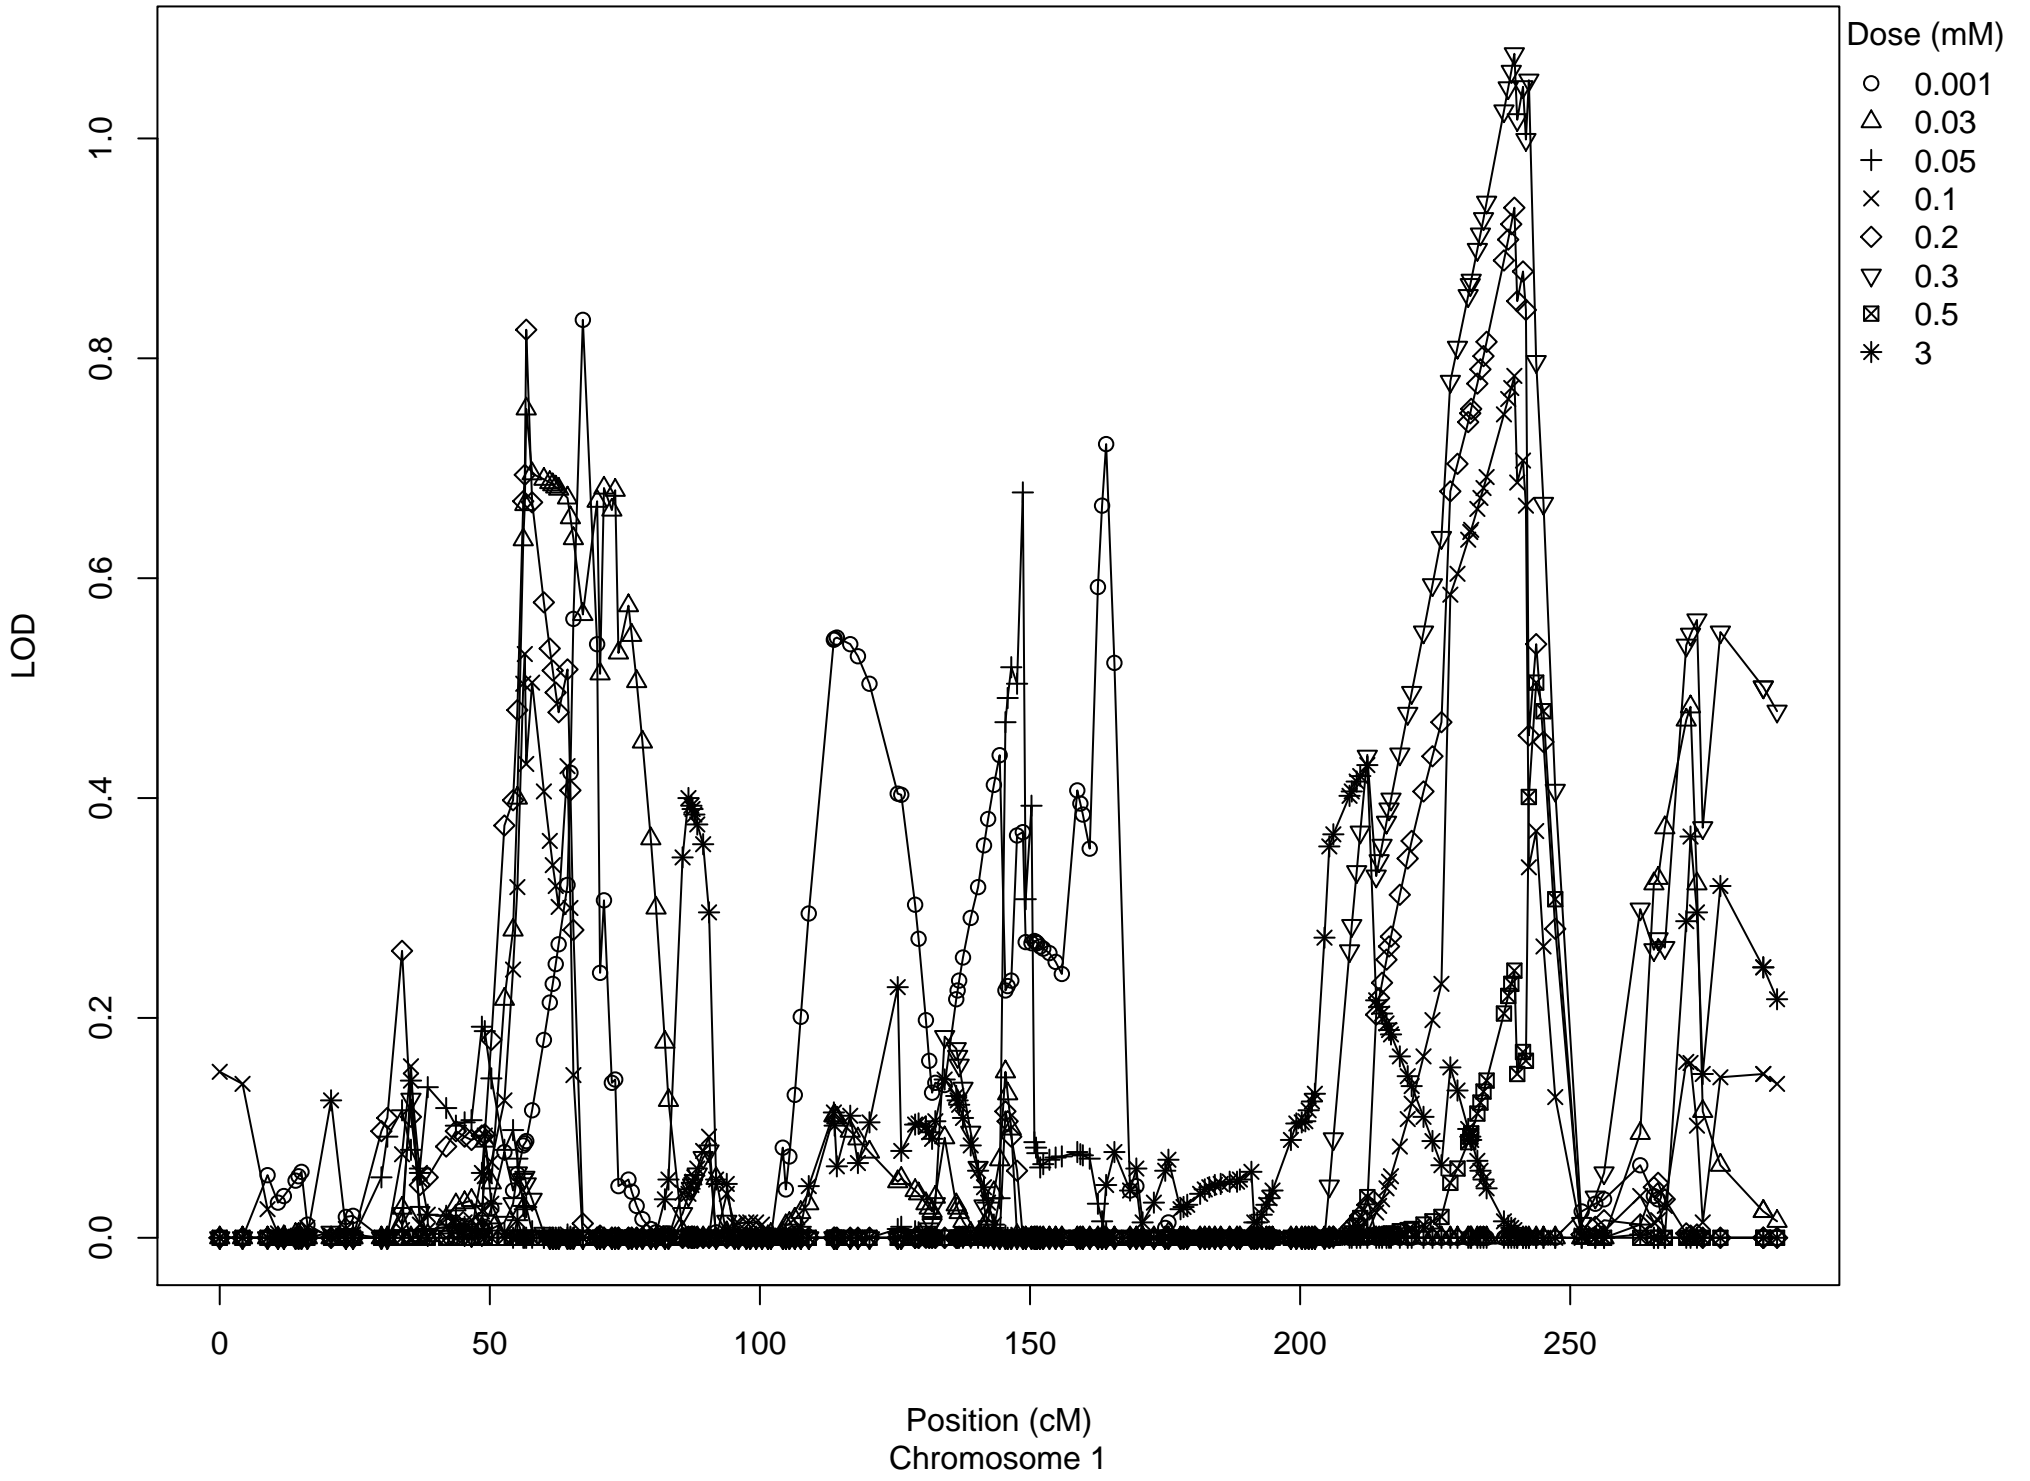

# 84A1 (84A1)

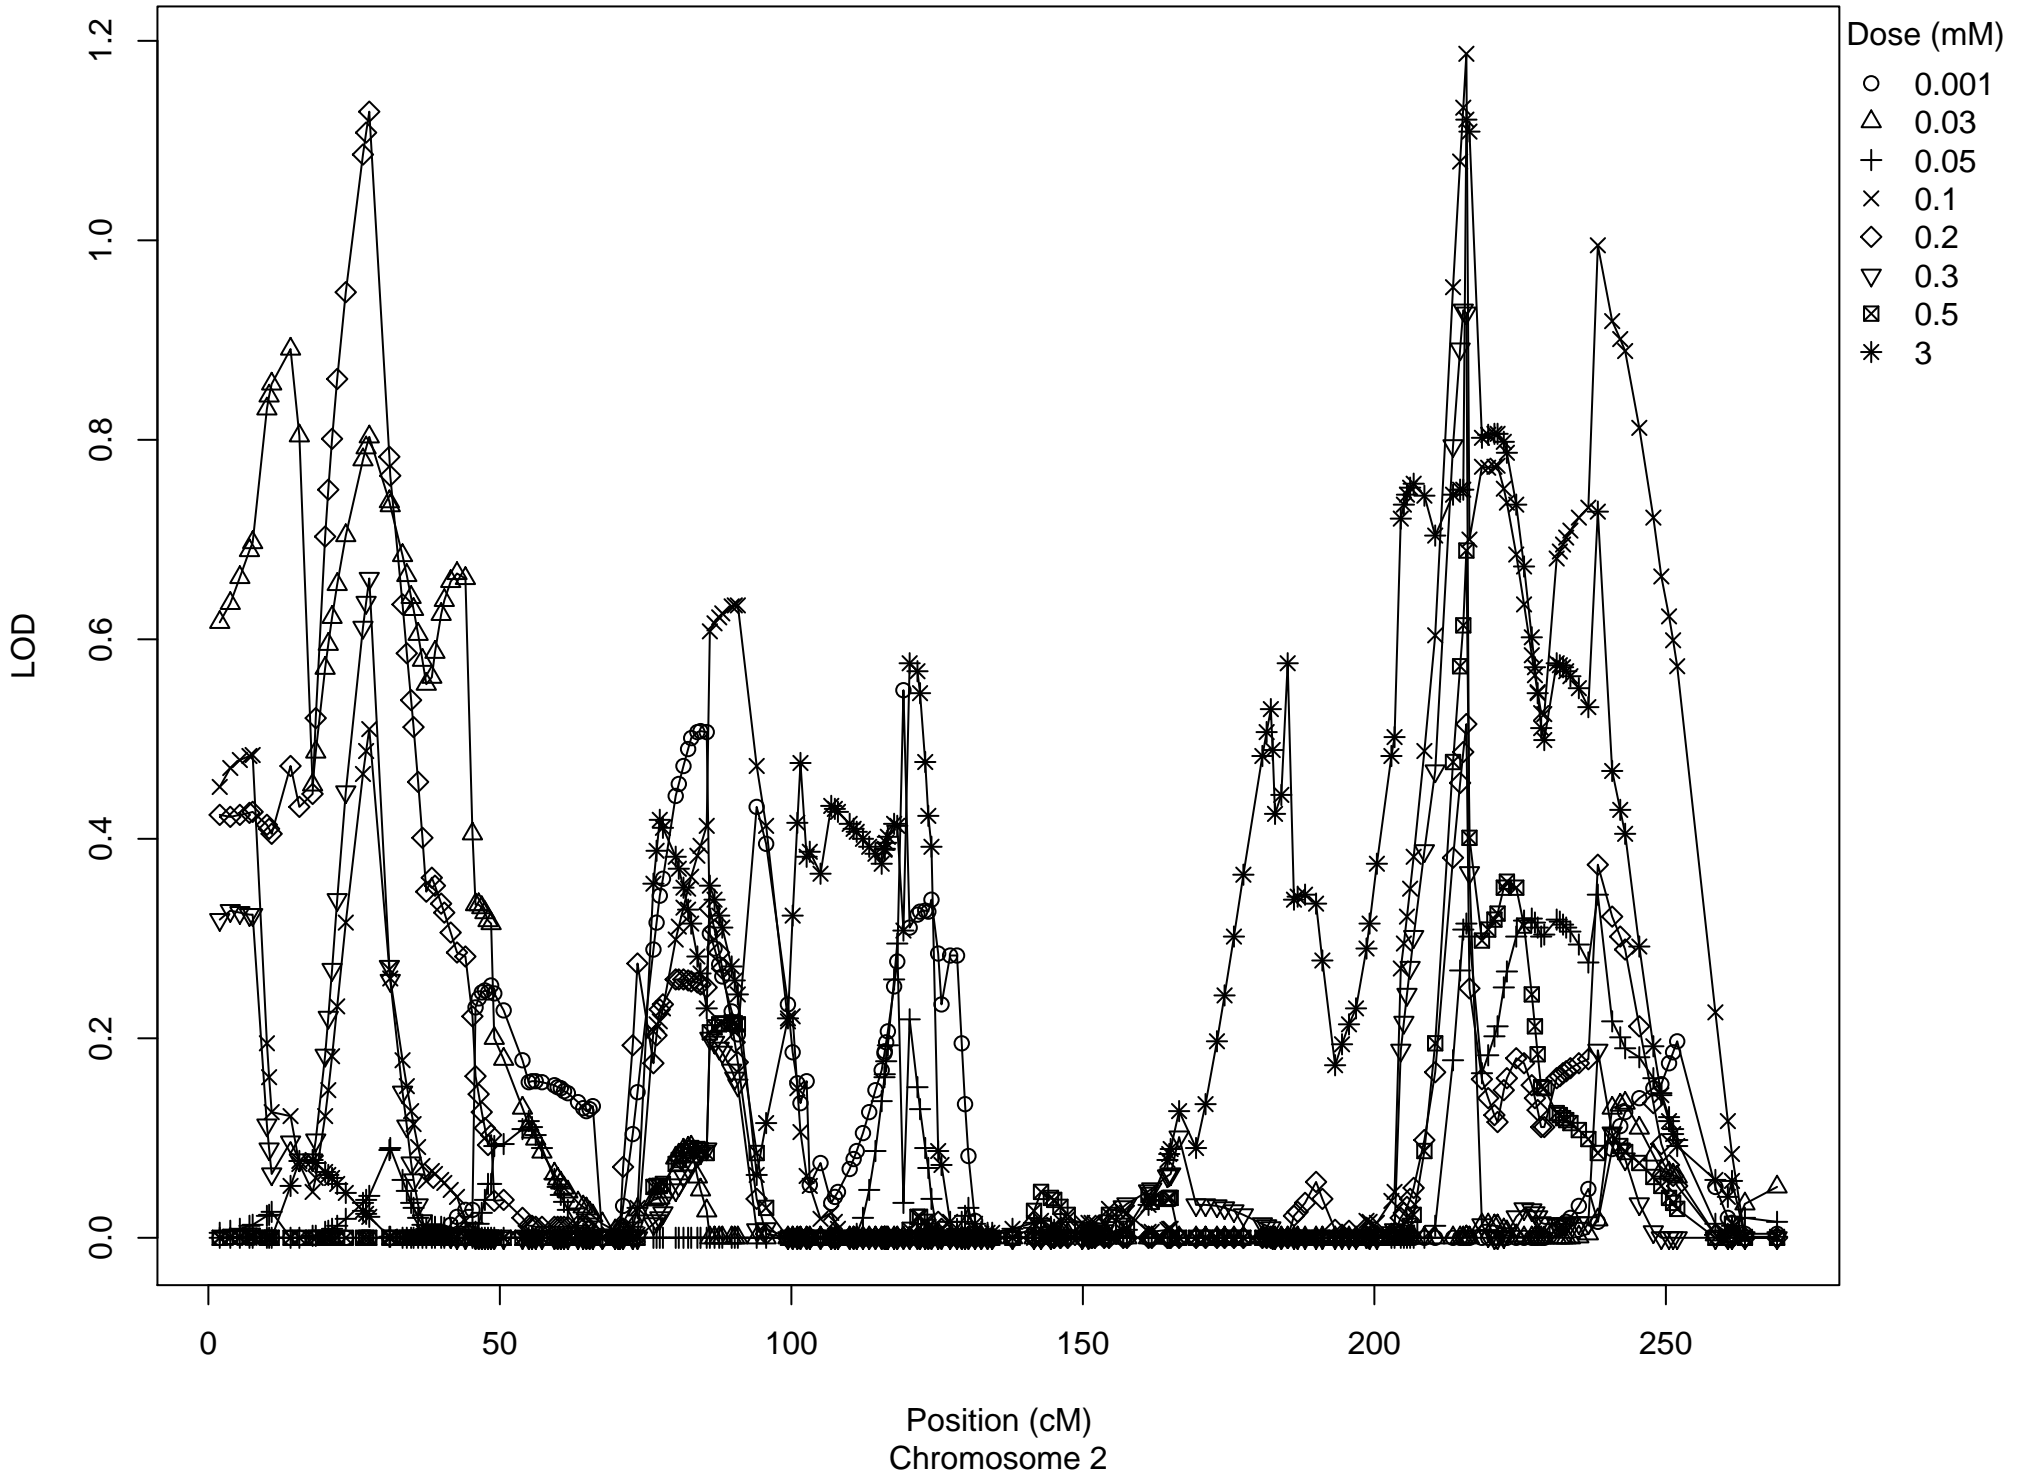



# 84A1 (84A1)

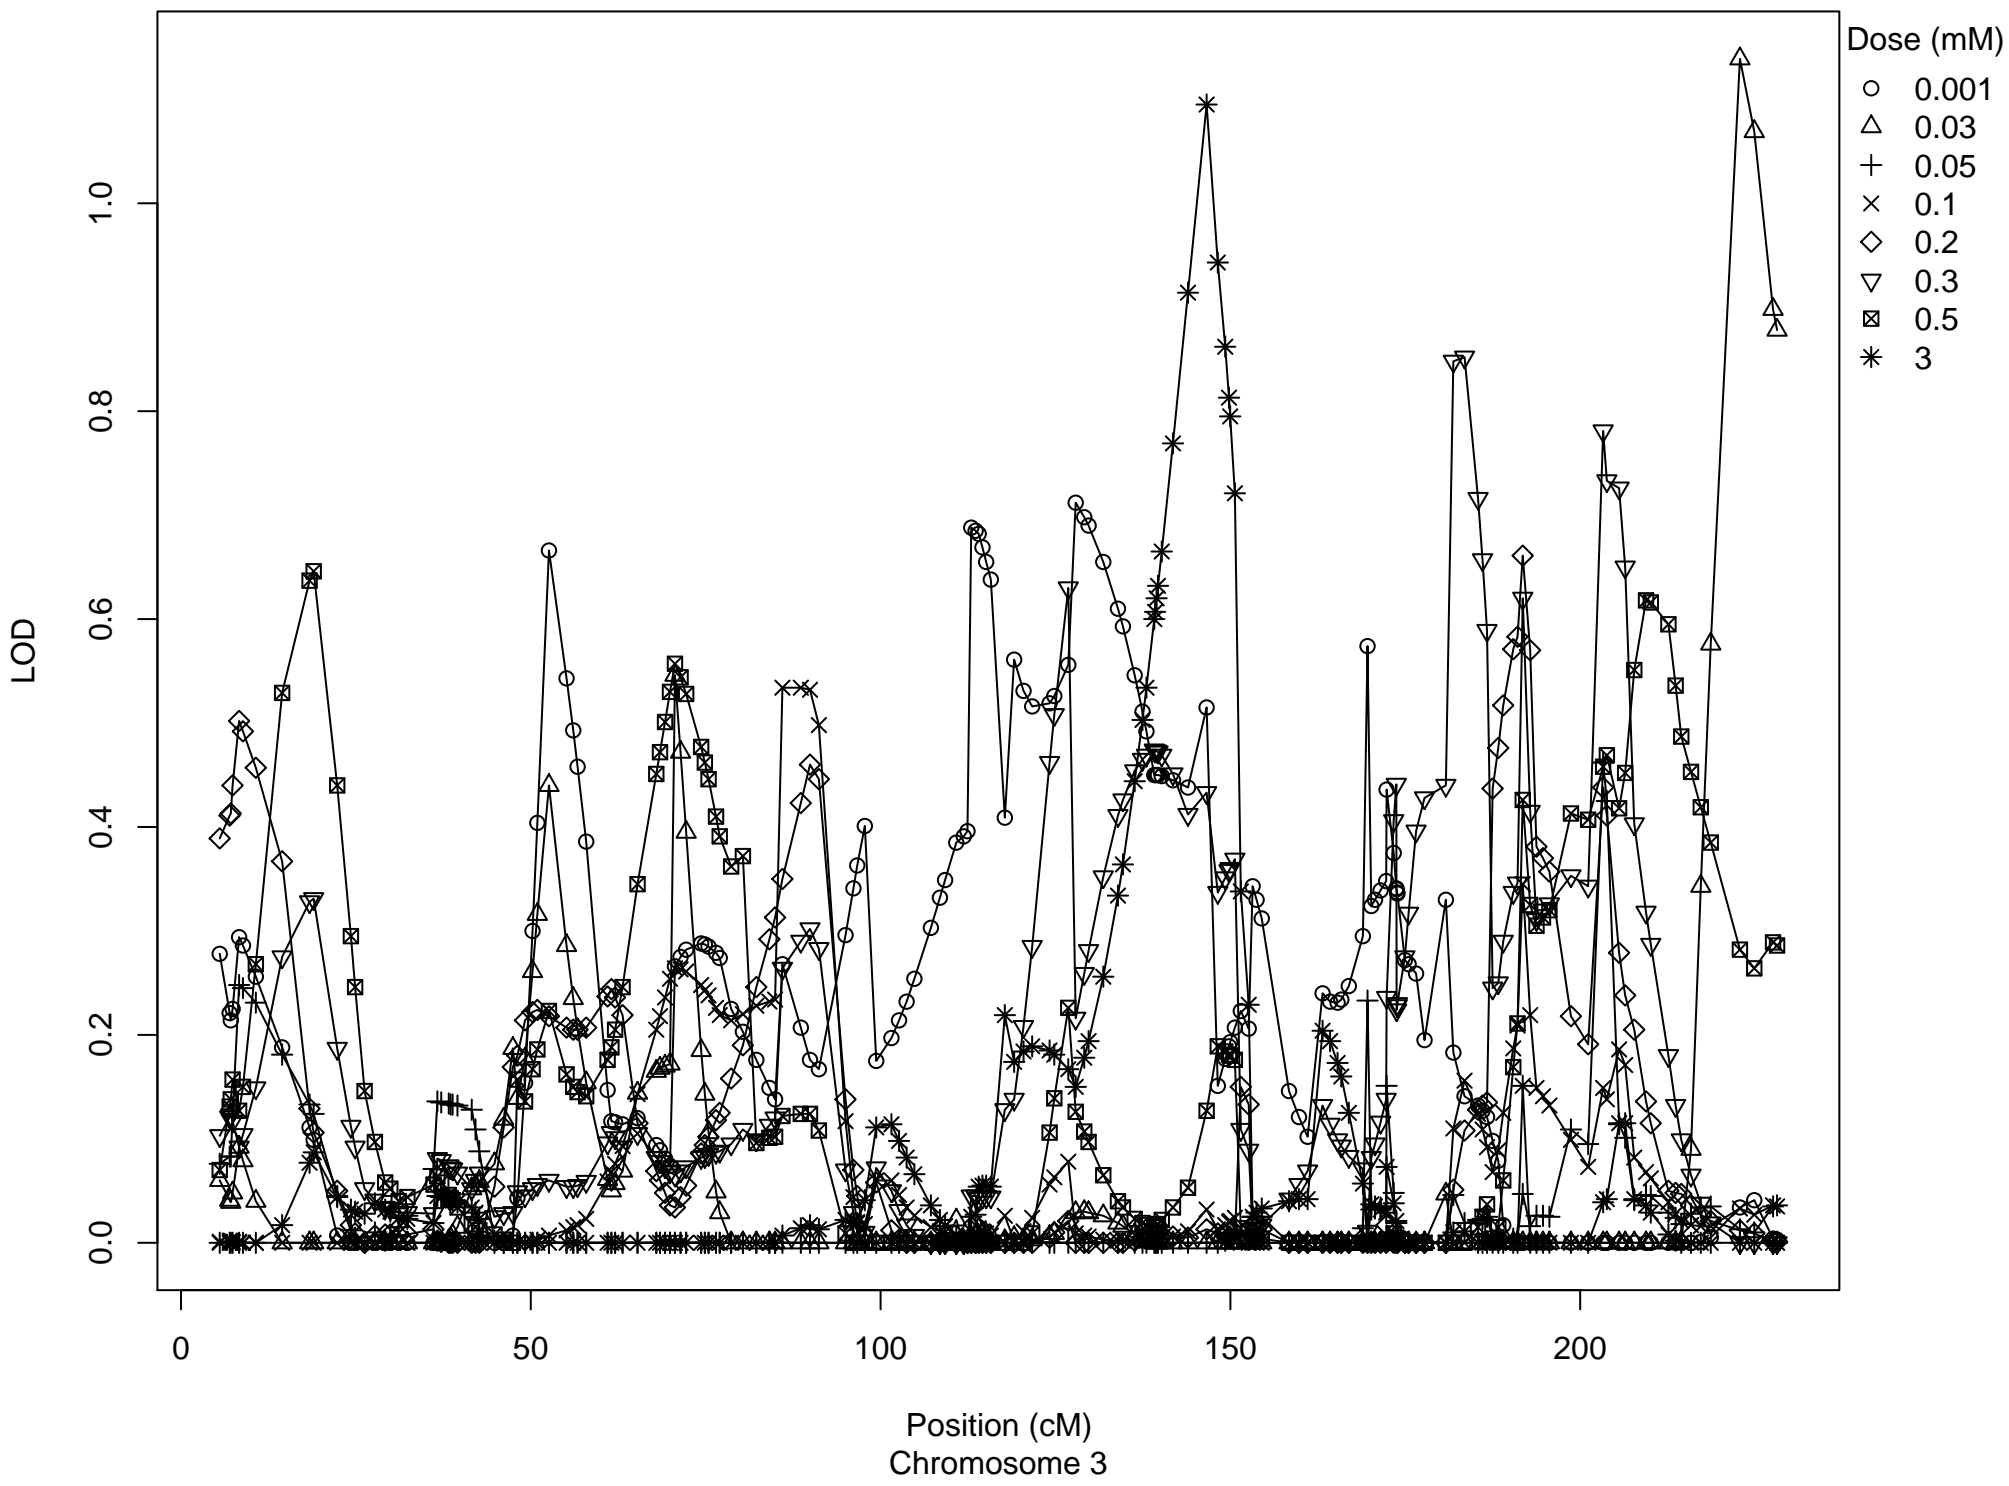











# 84A1 (84A1)

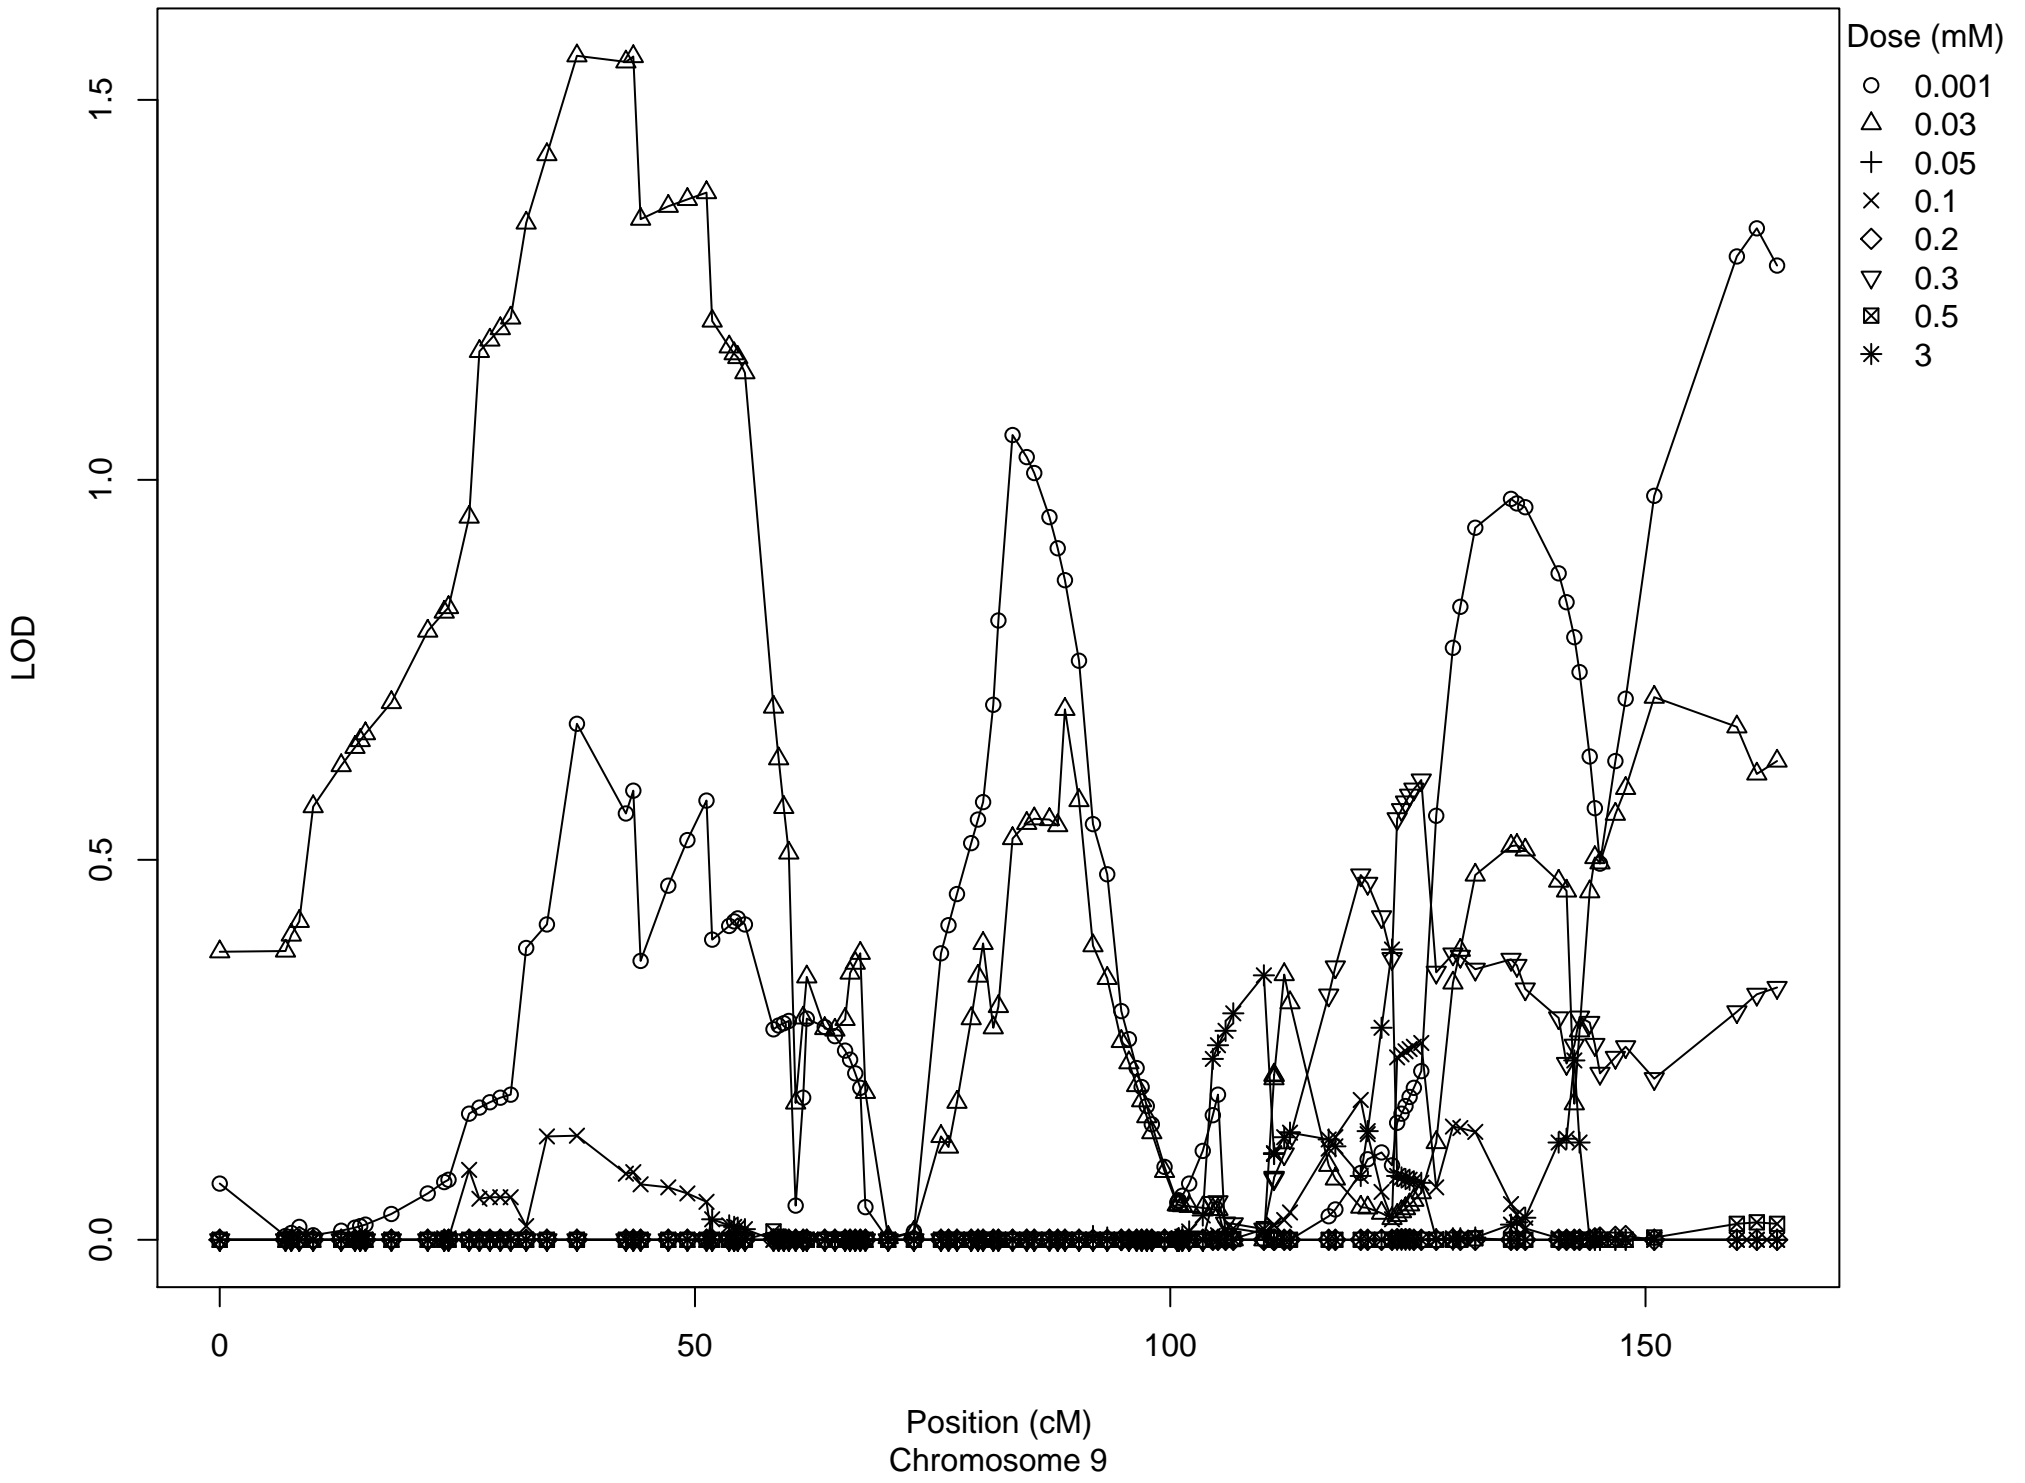

# 84A1 (84A1)

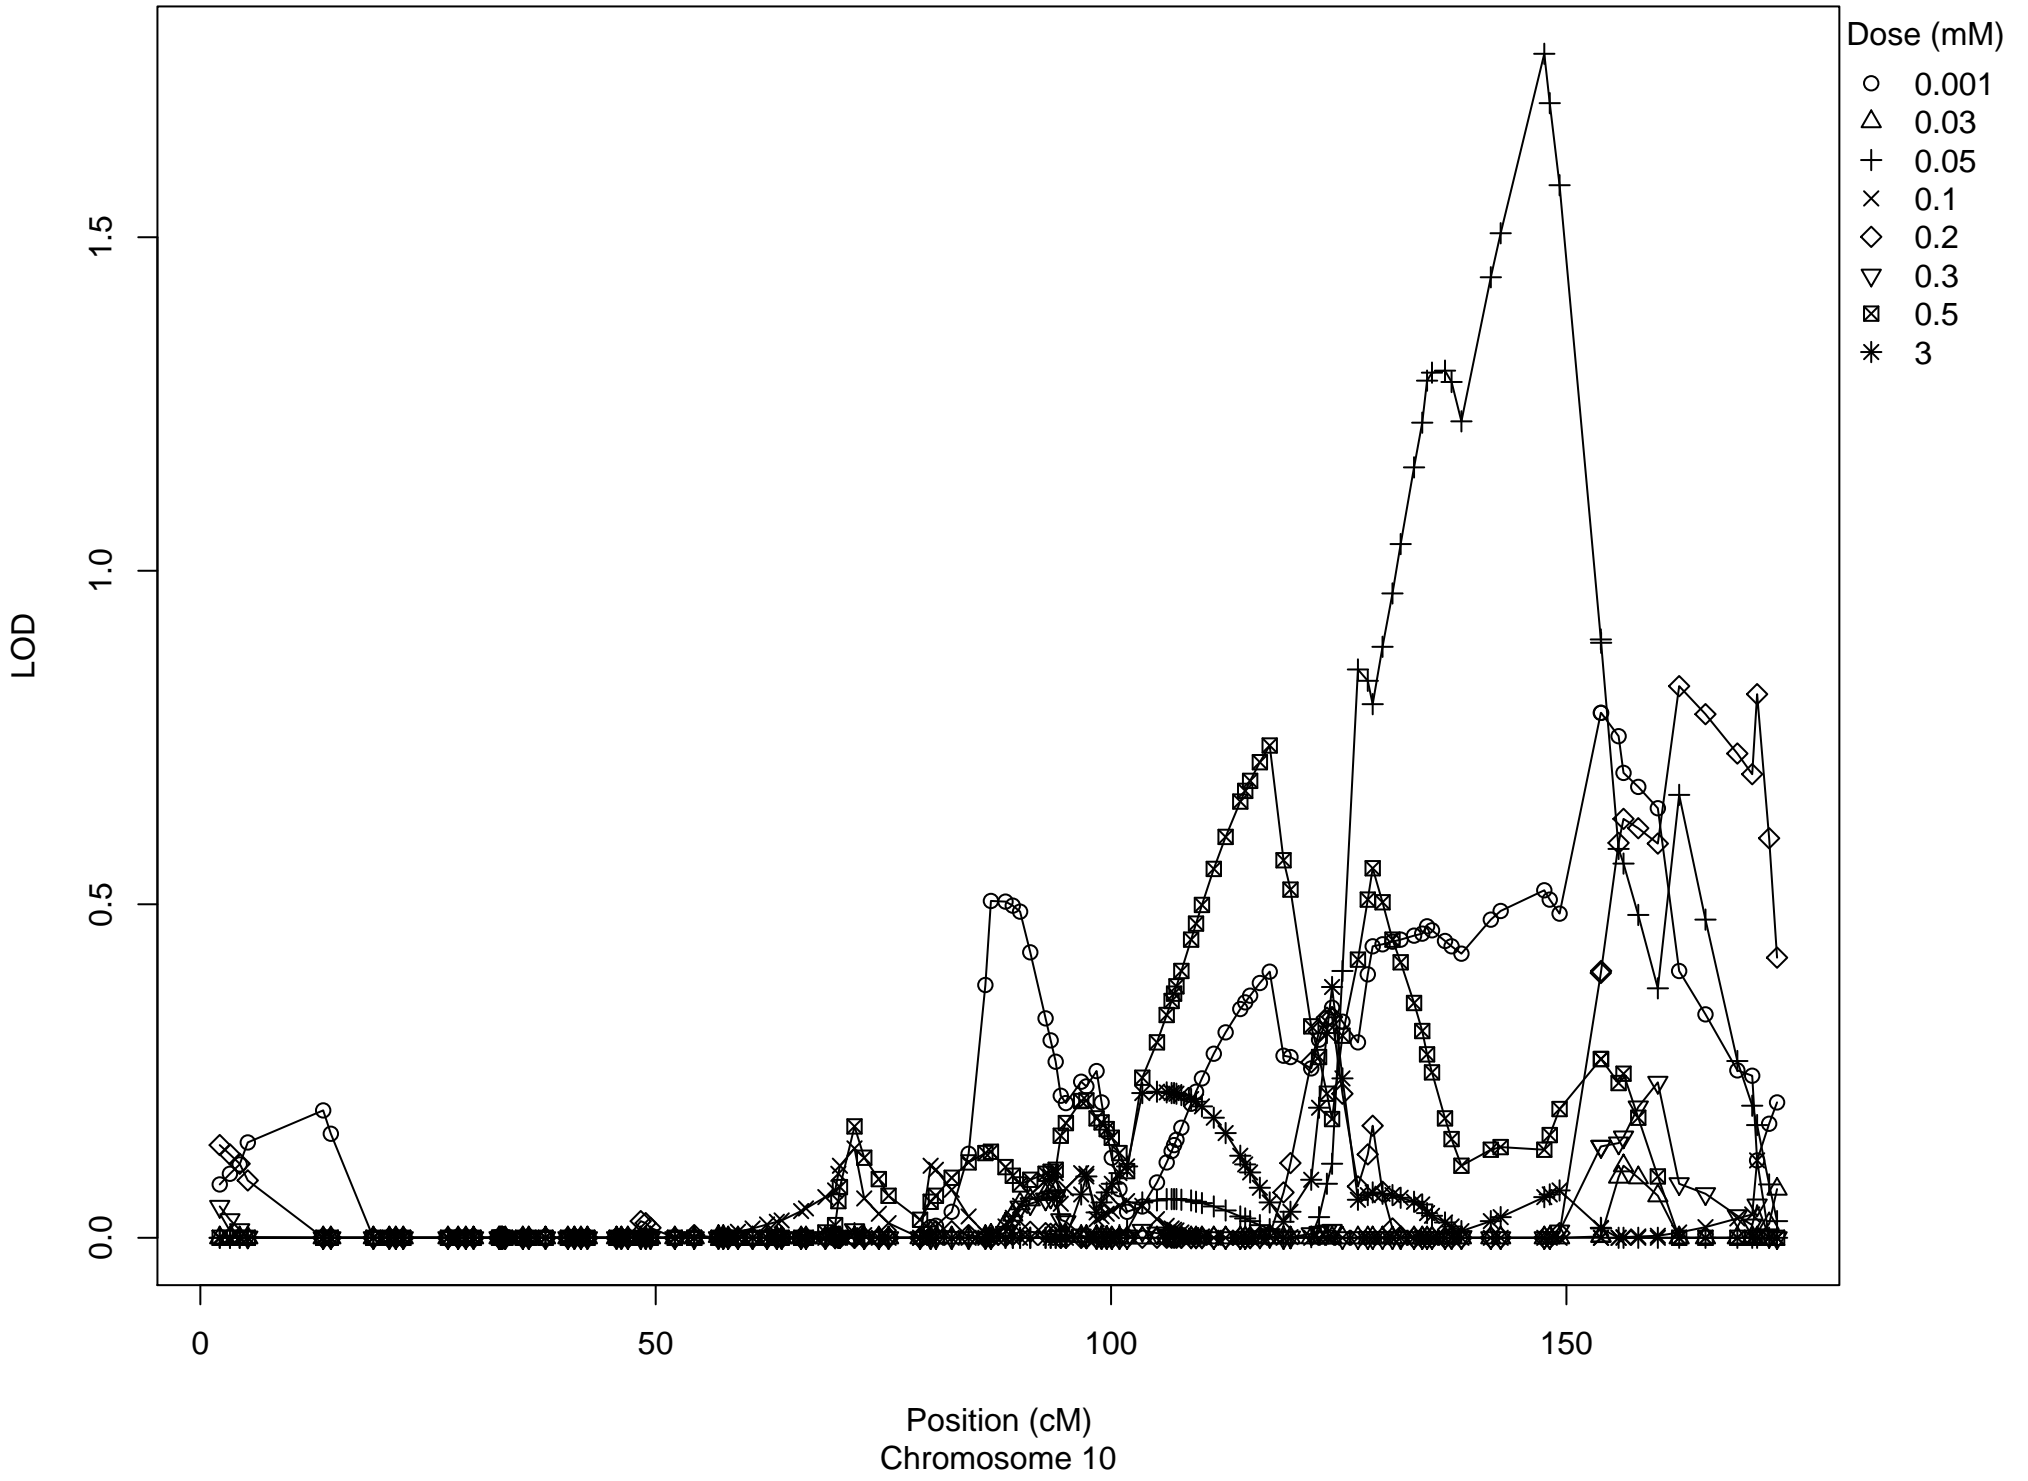





# 84A1 (84A1)

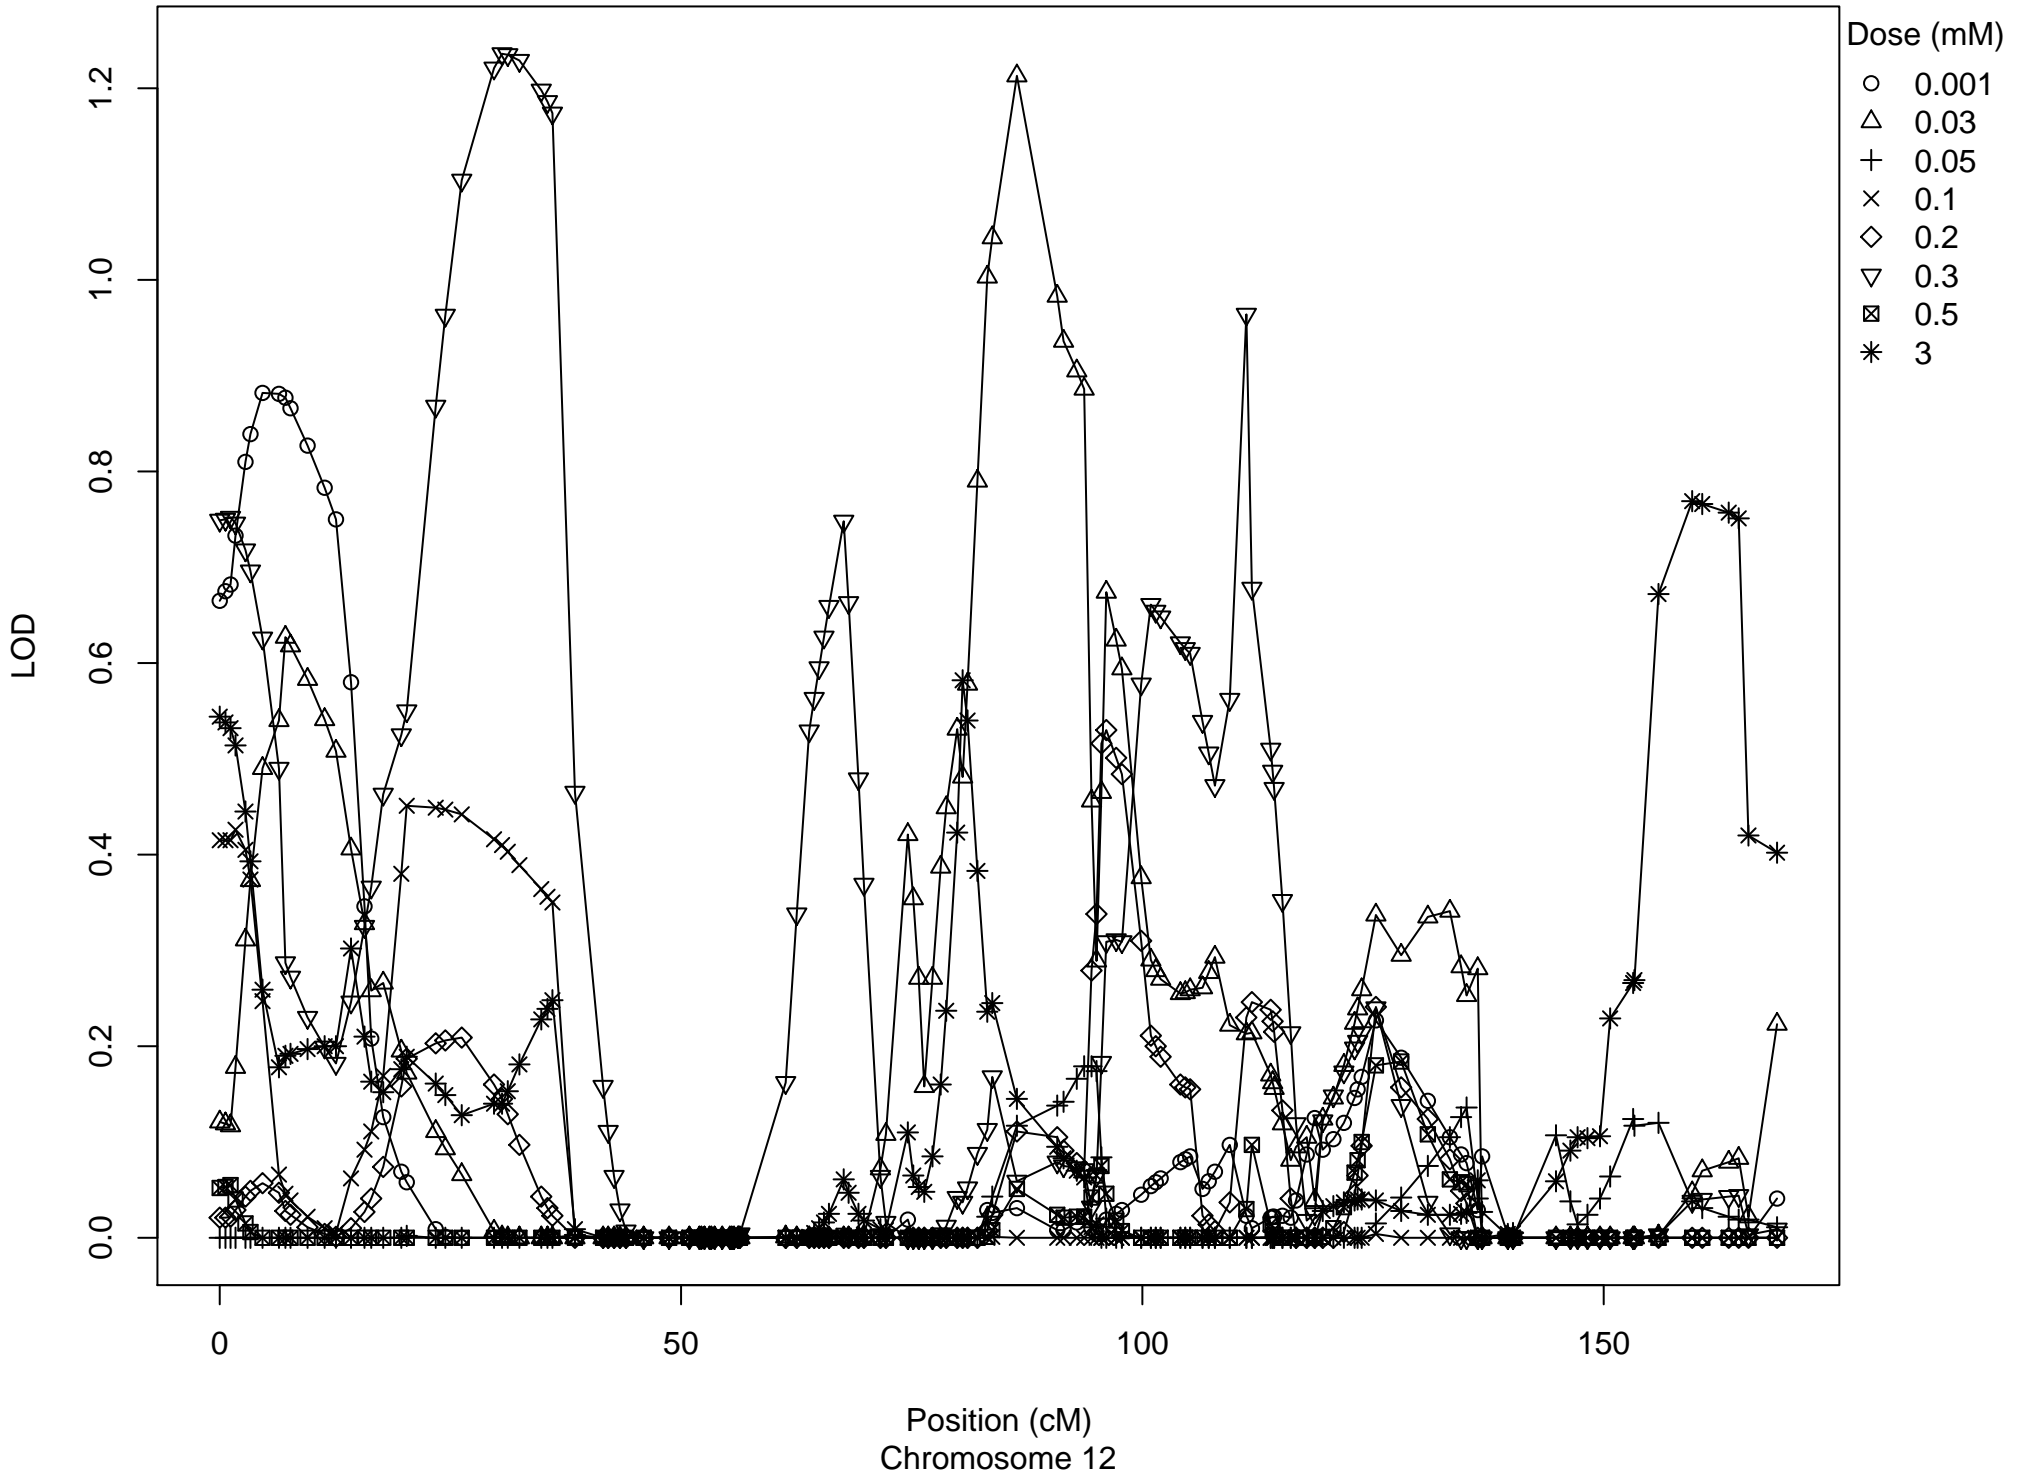

# 84A1 (84A1)

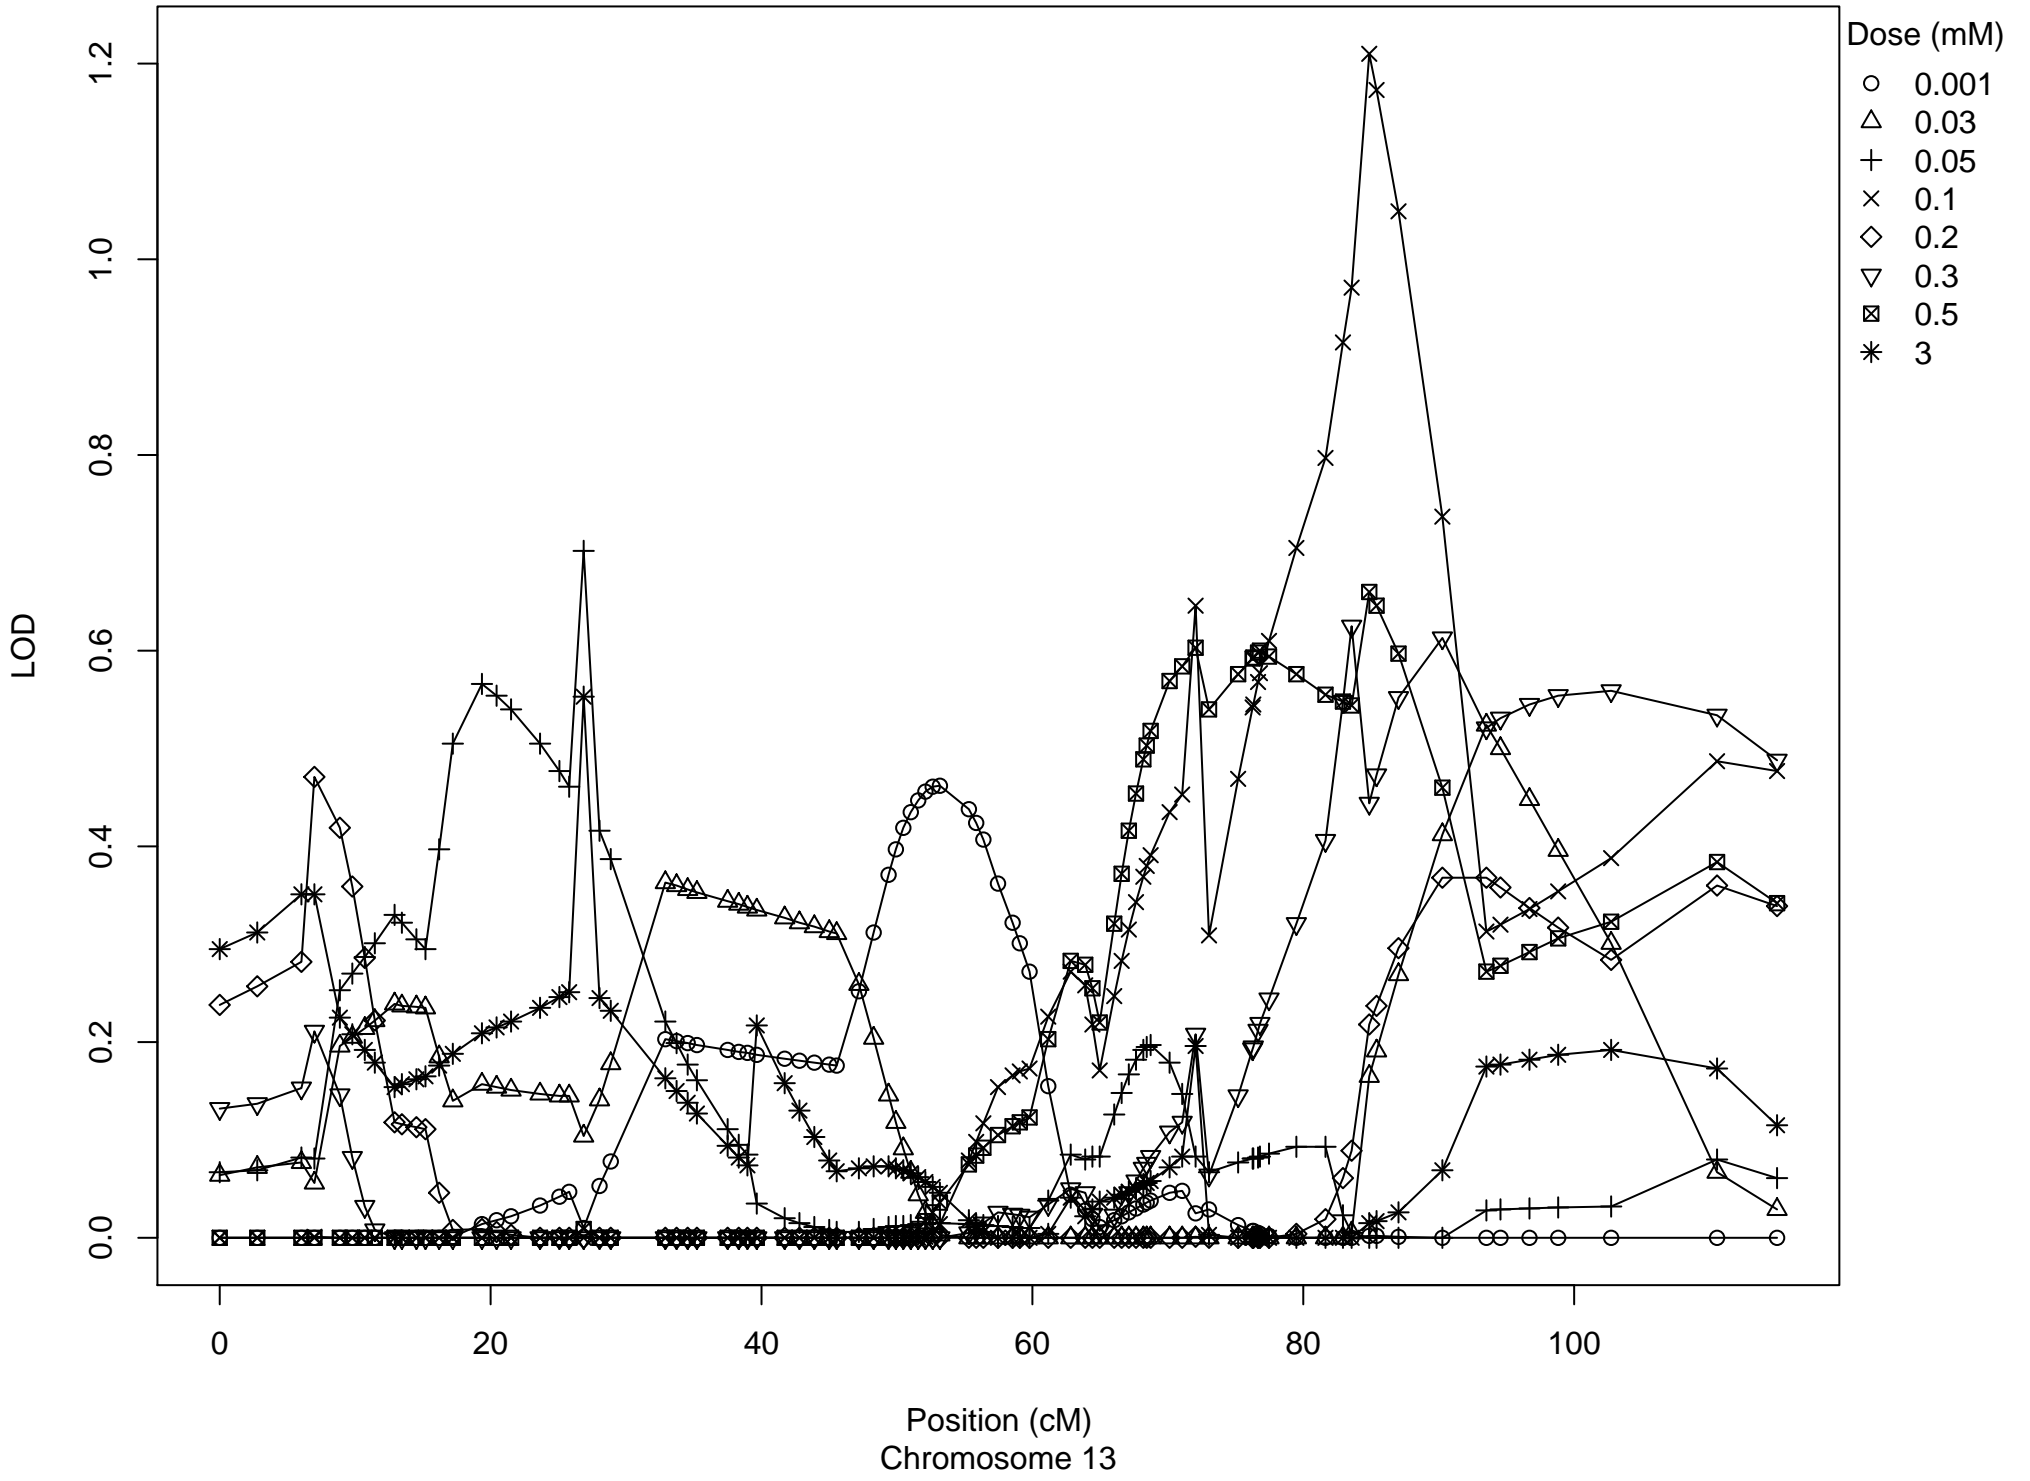

# 84A1 (84A1)

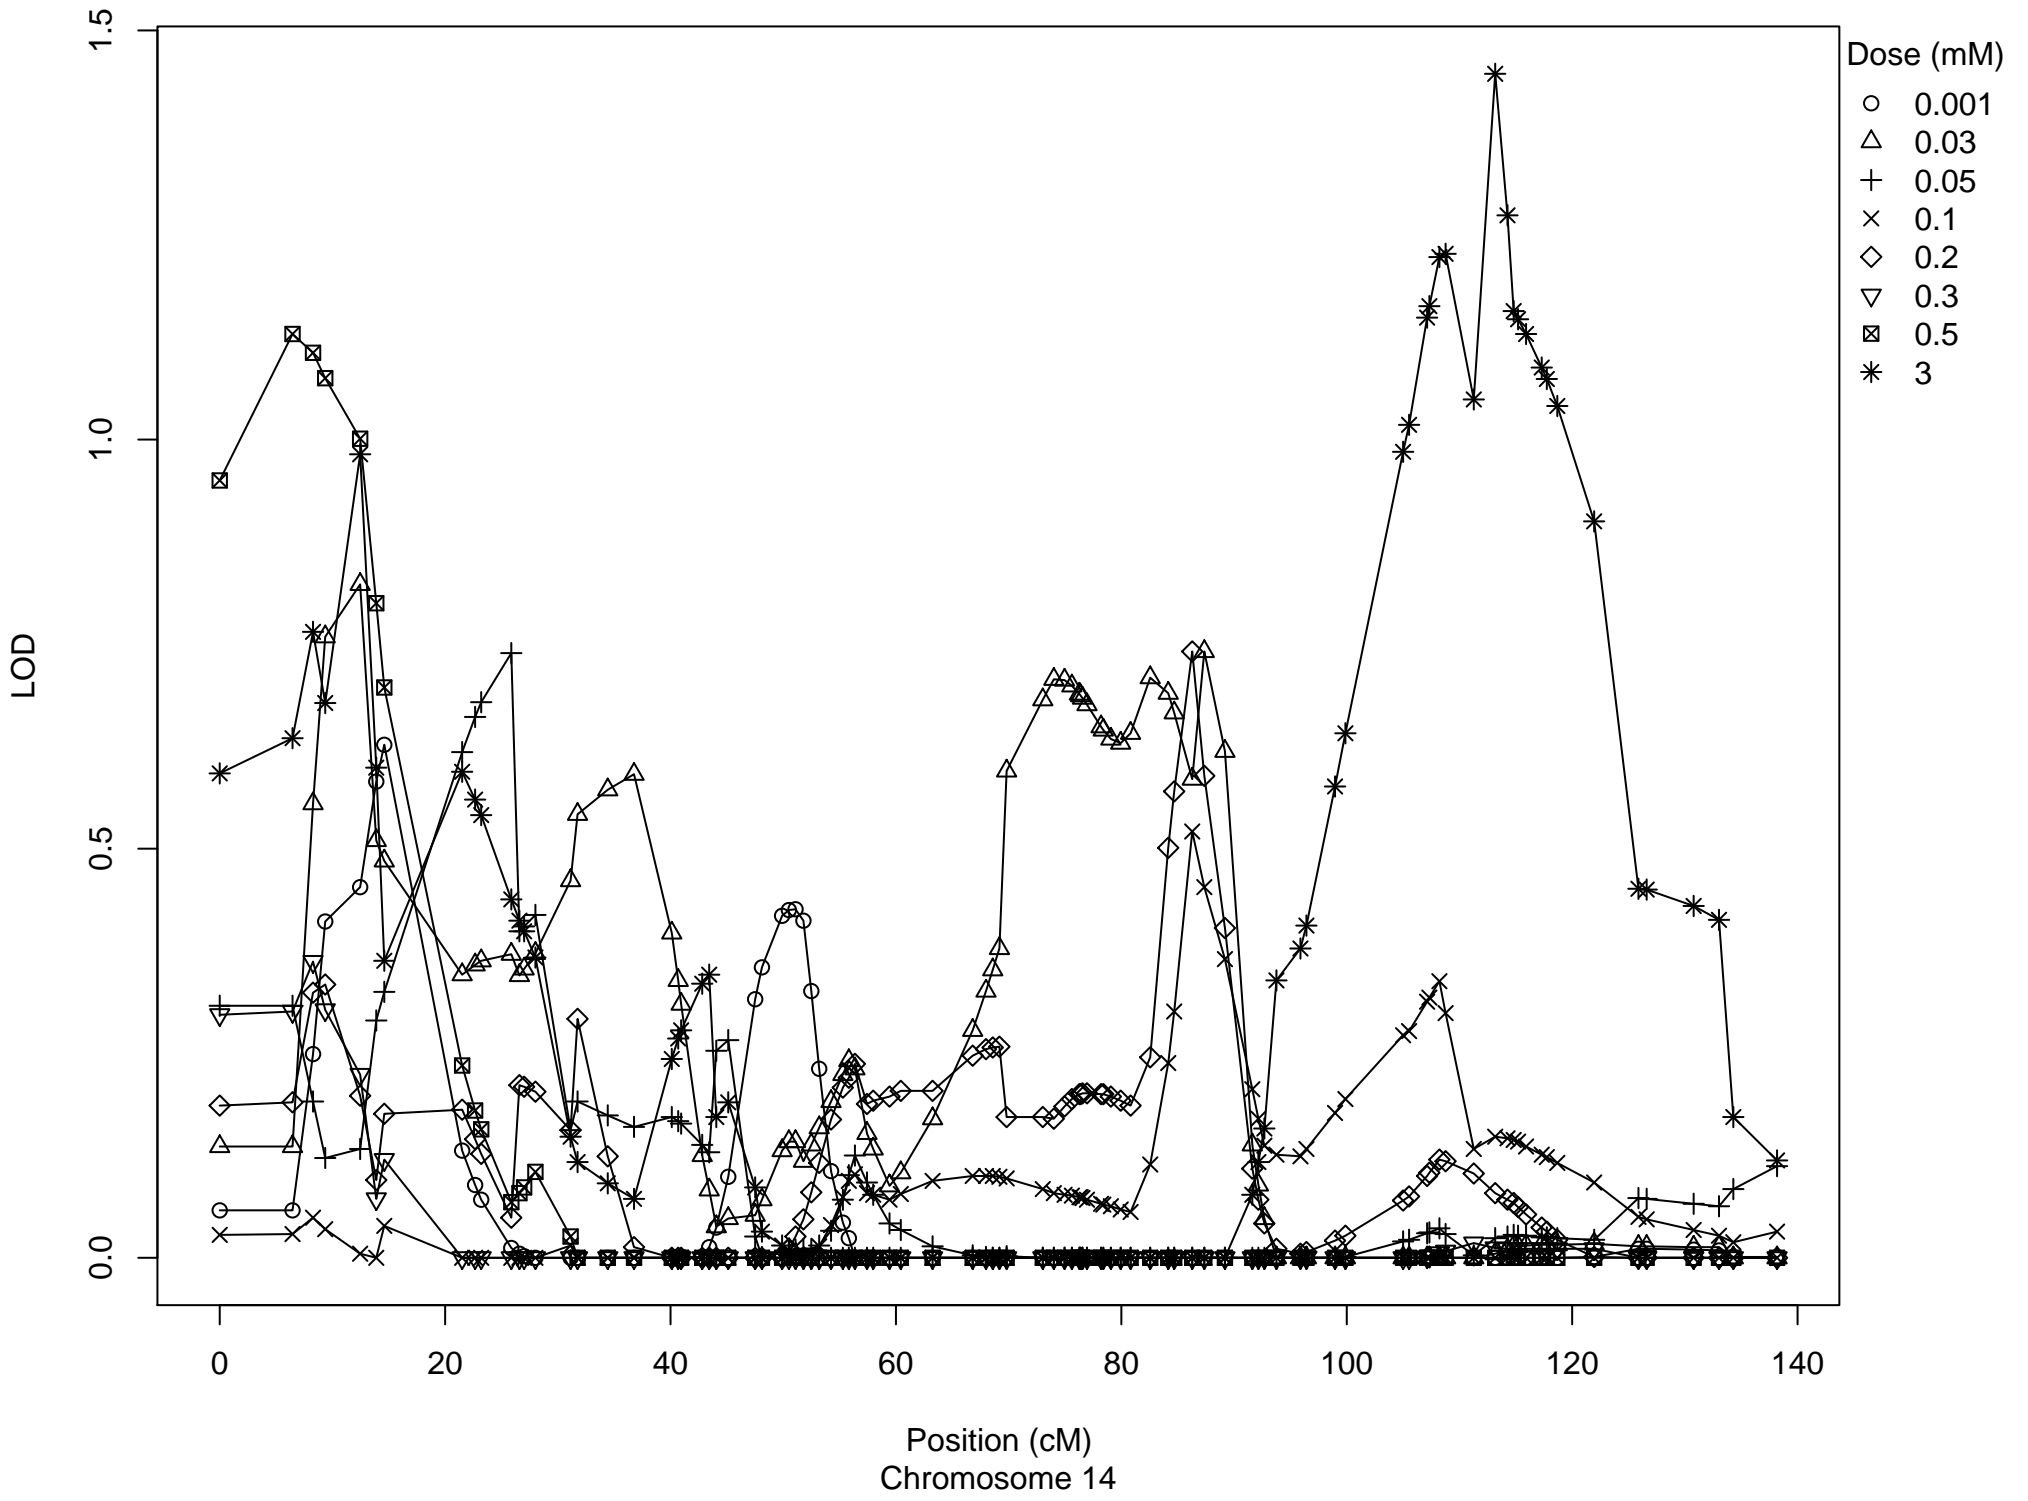

# 84A1 (84A1)

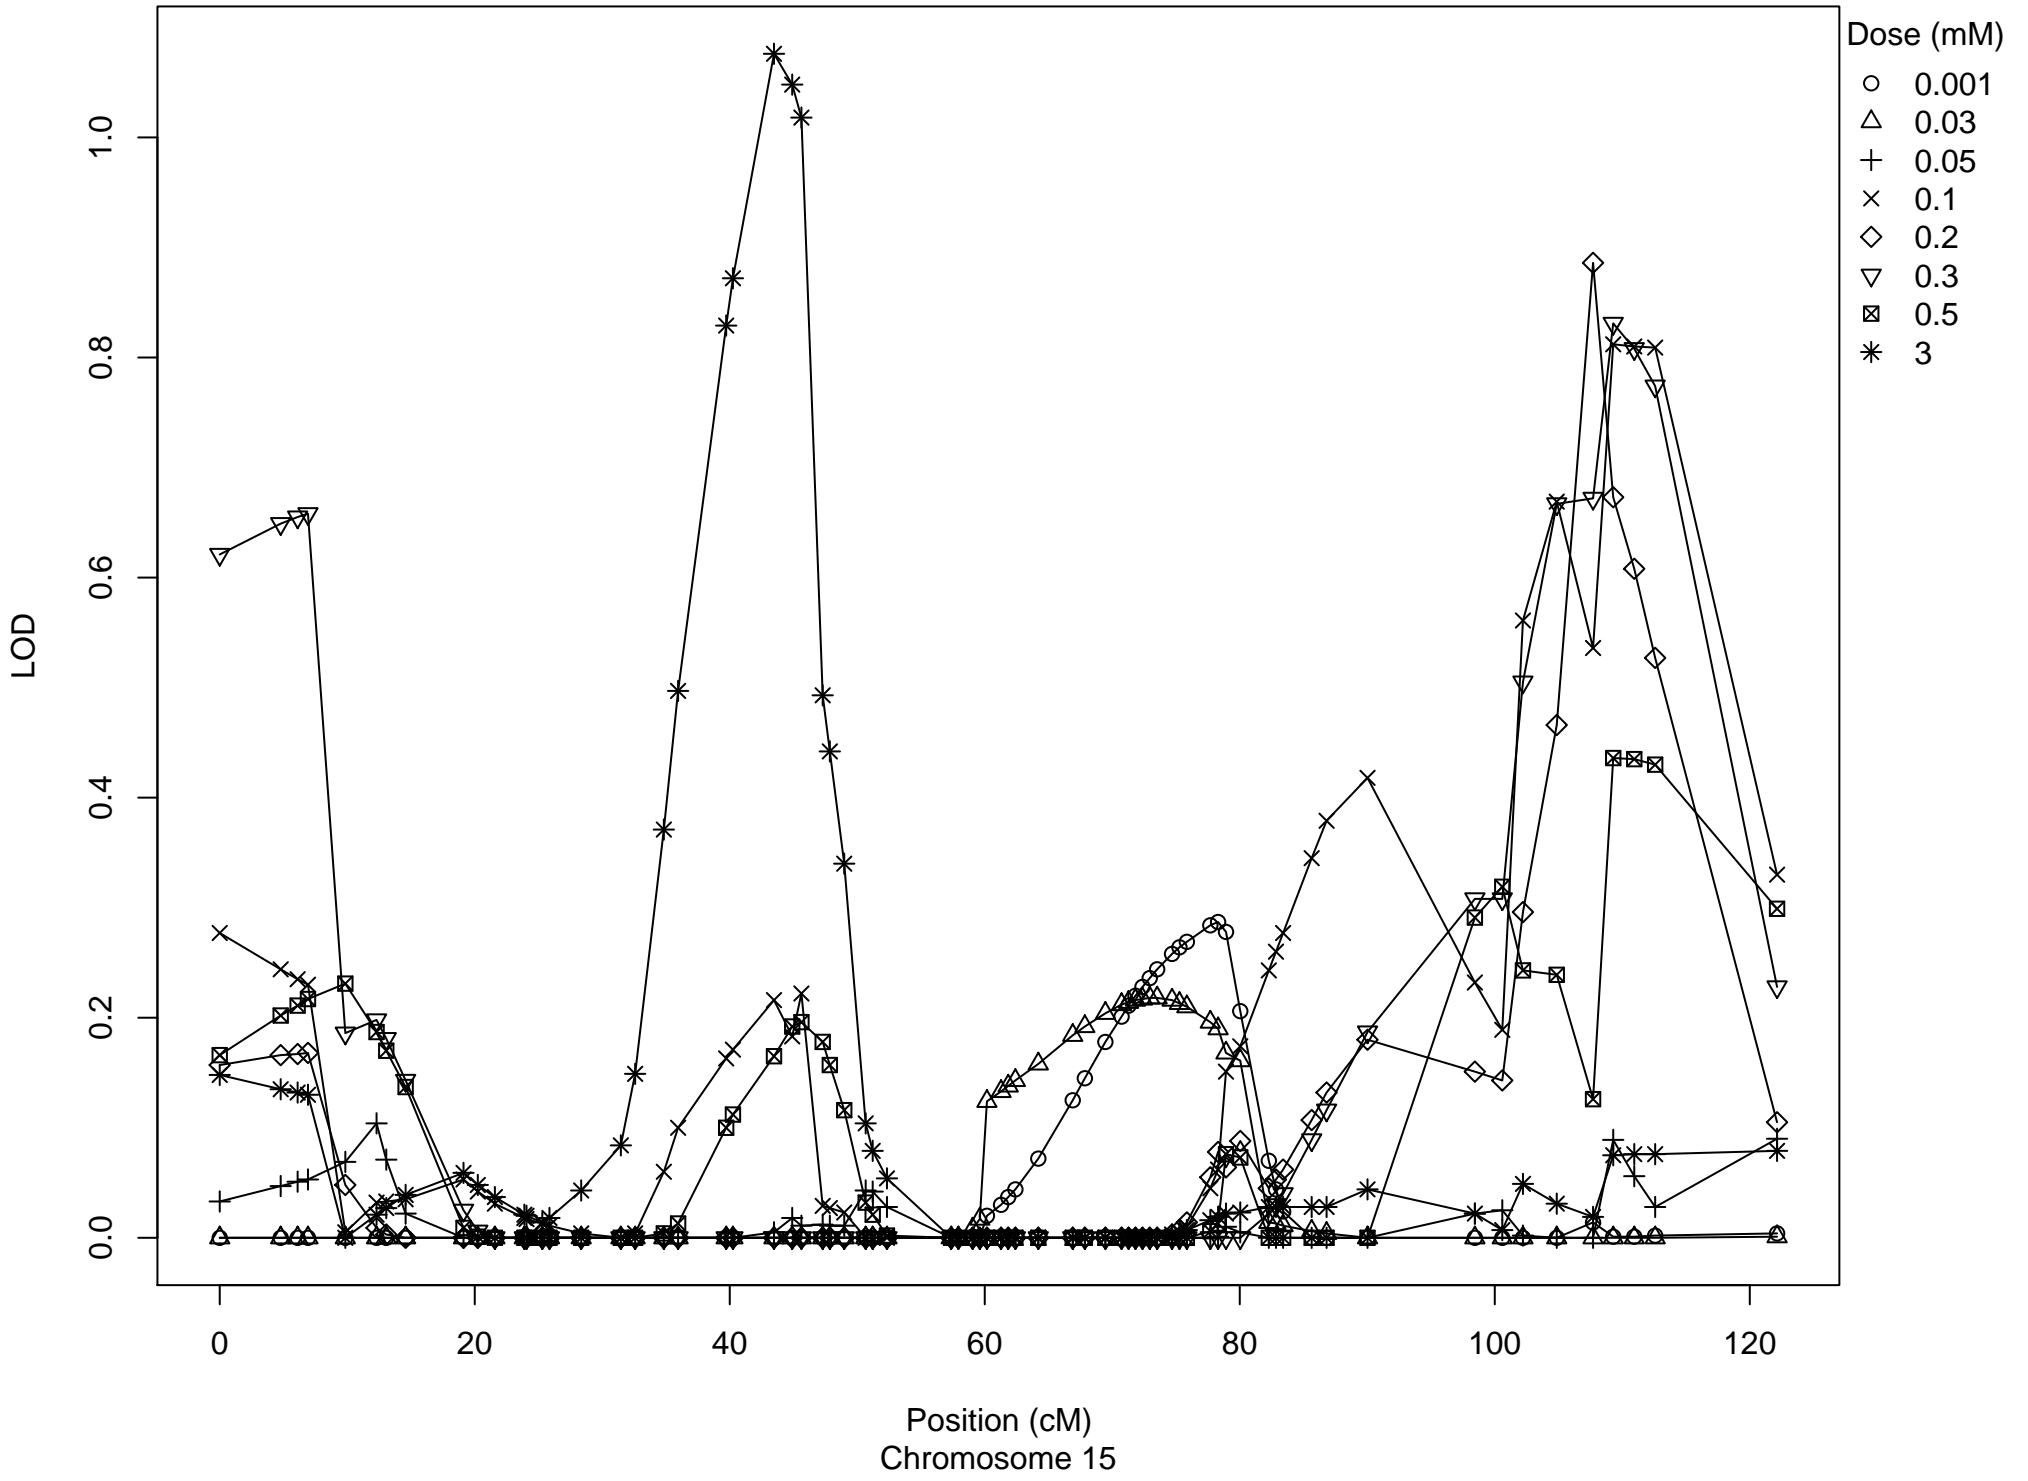

# 84A1 (84A1)

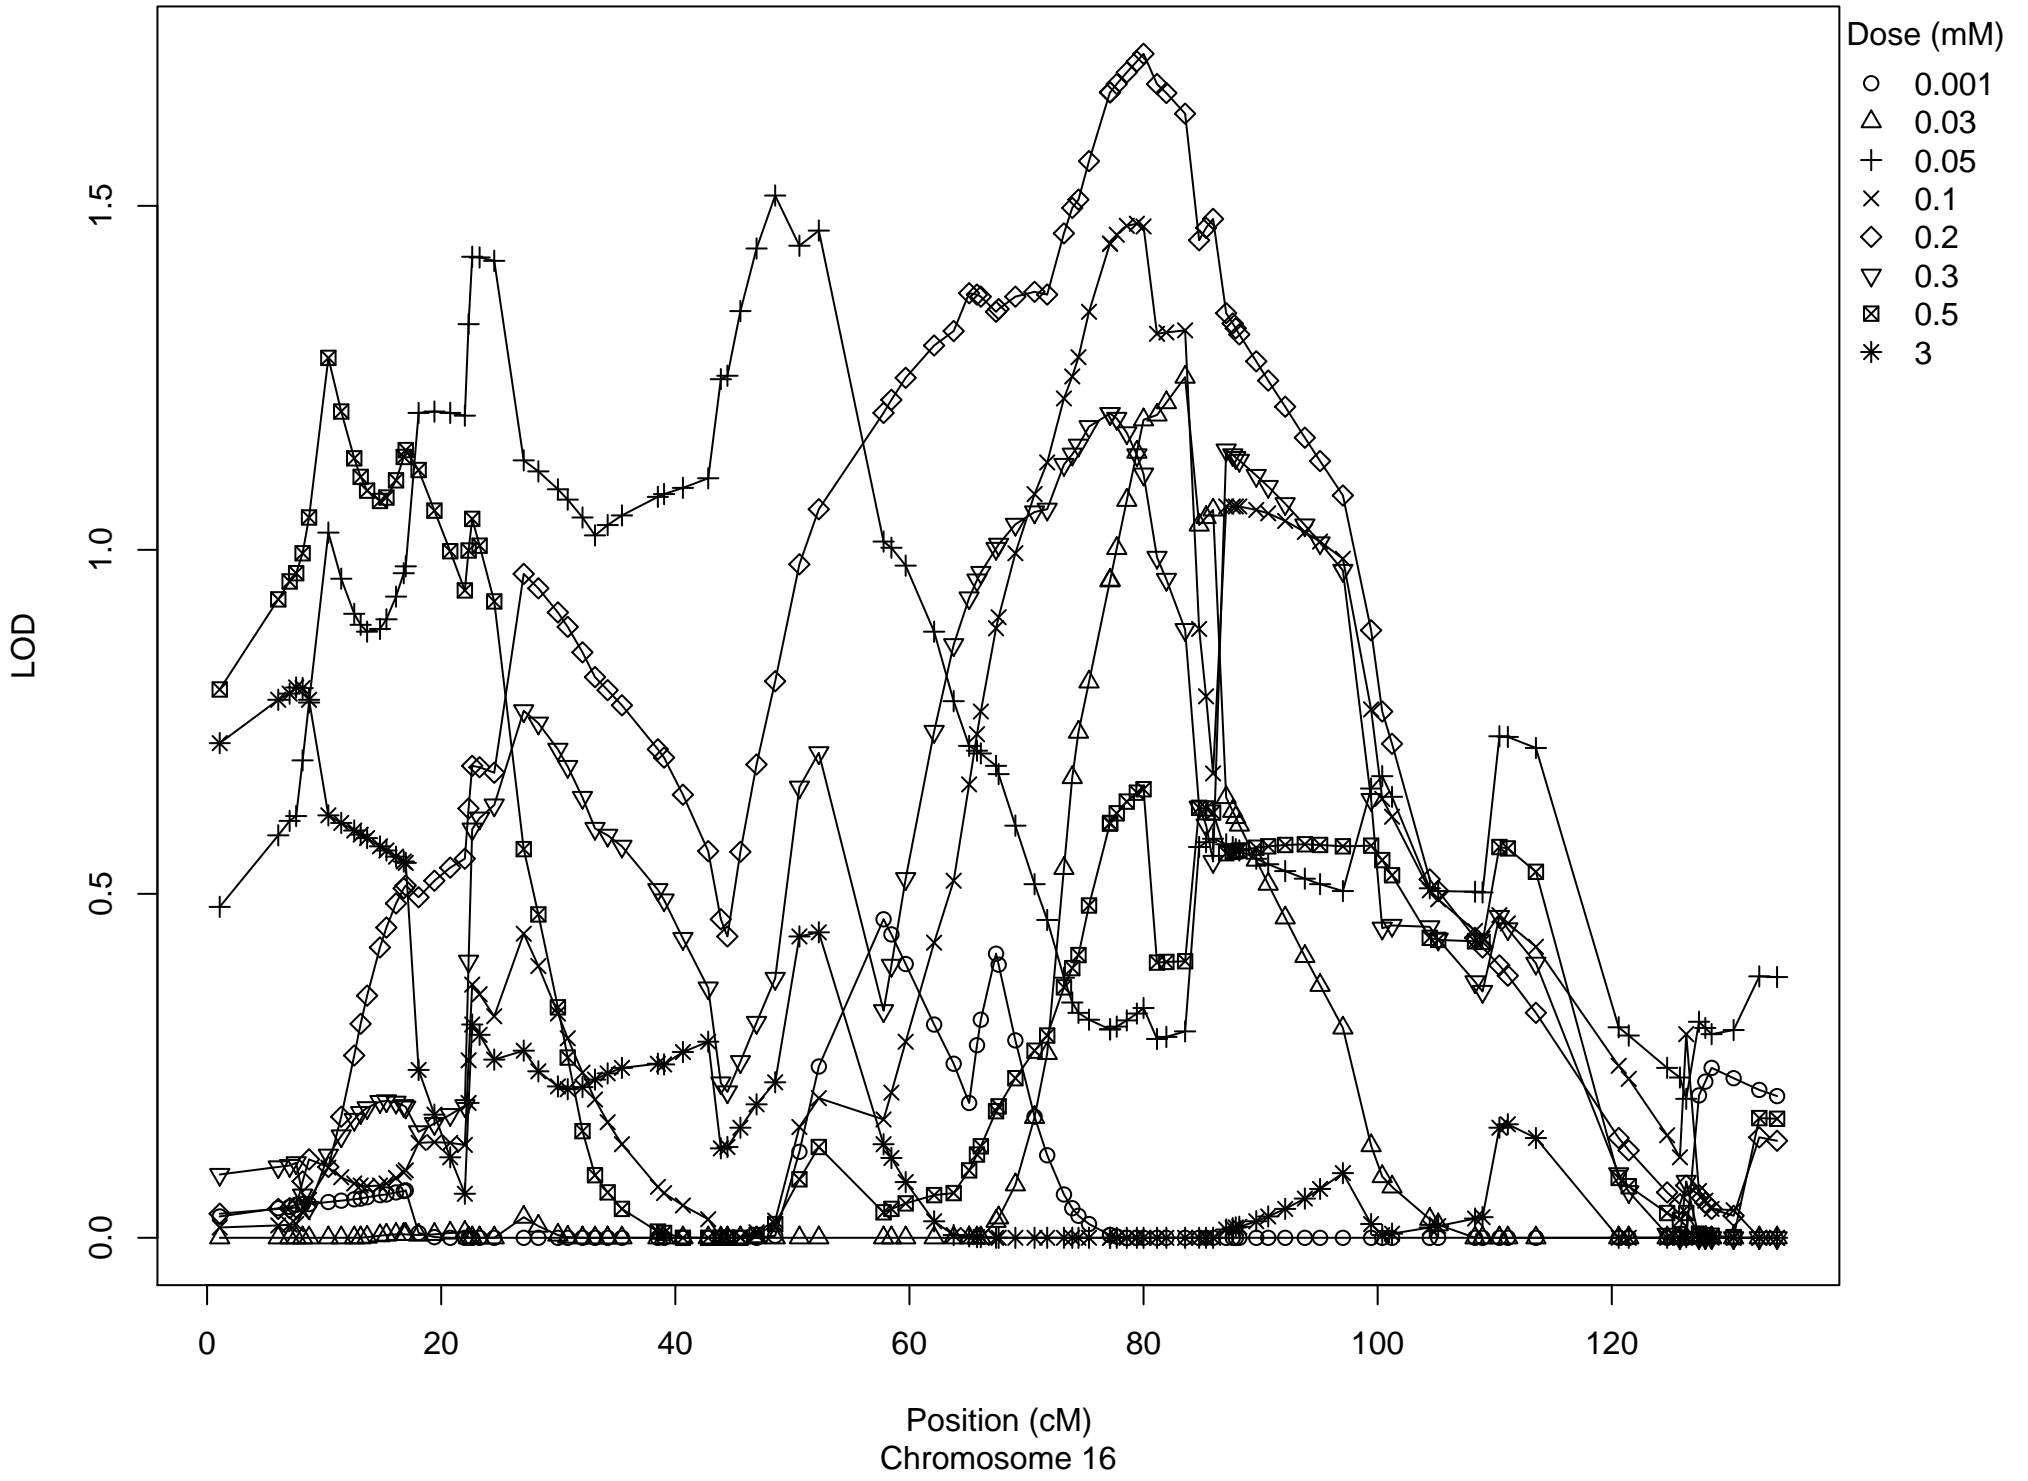

# 84A1 (84A1)

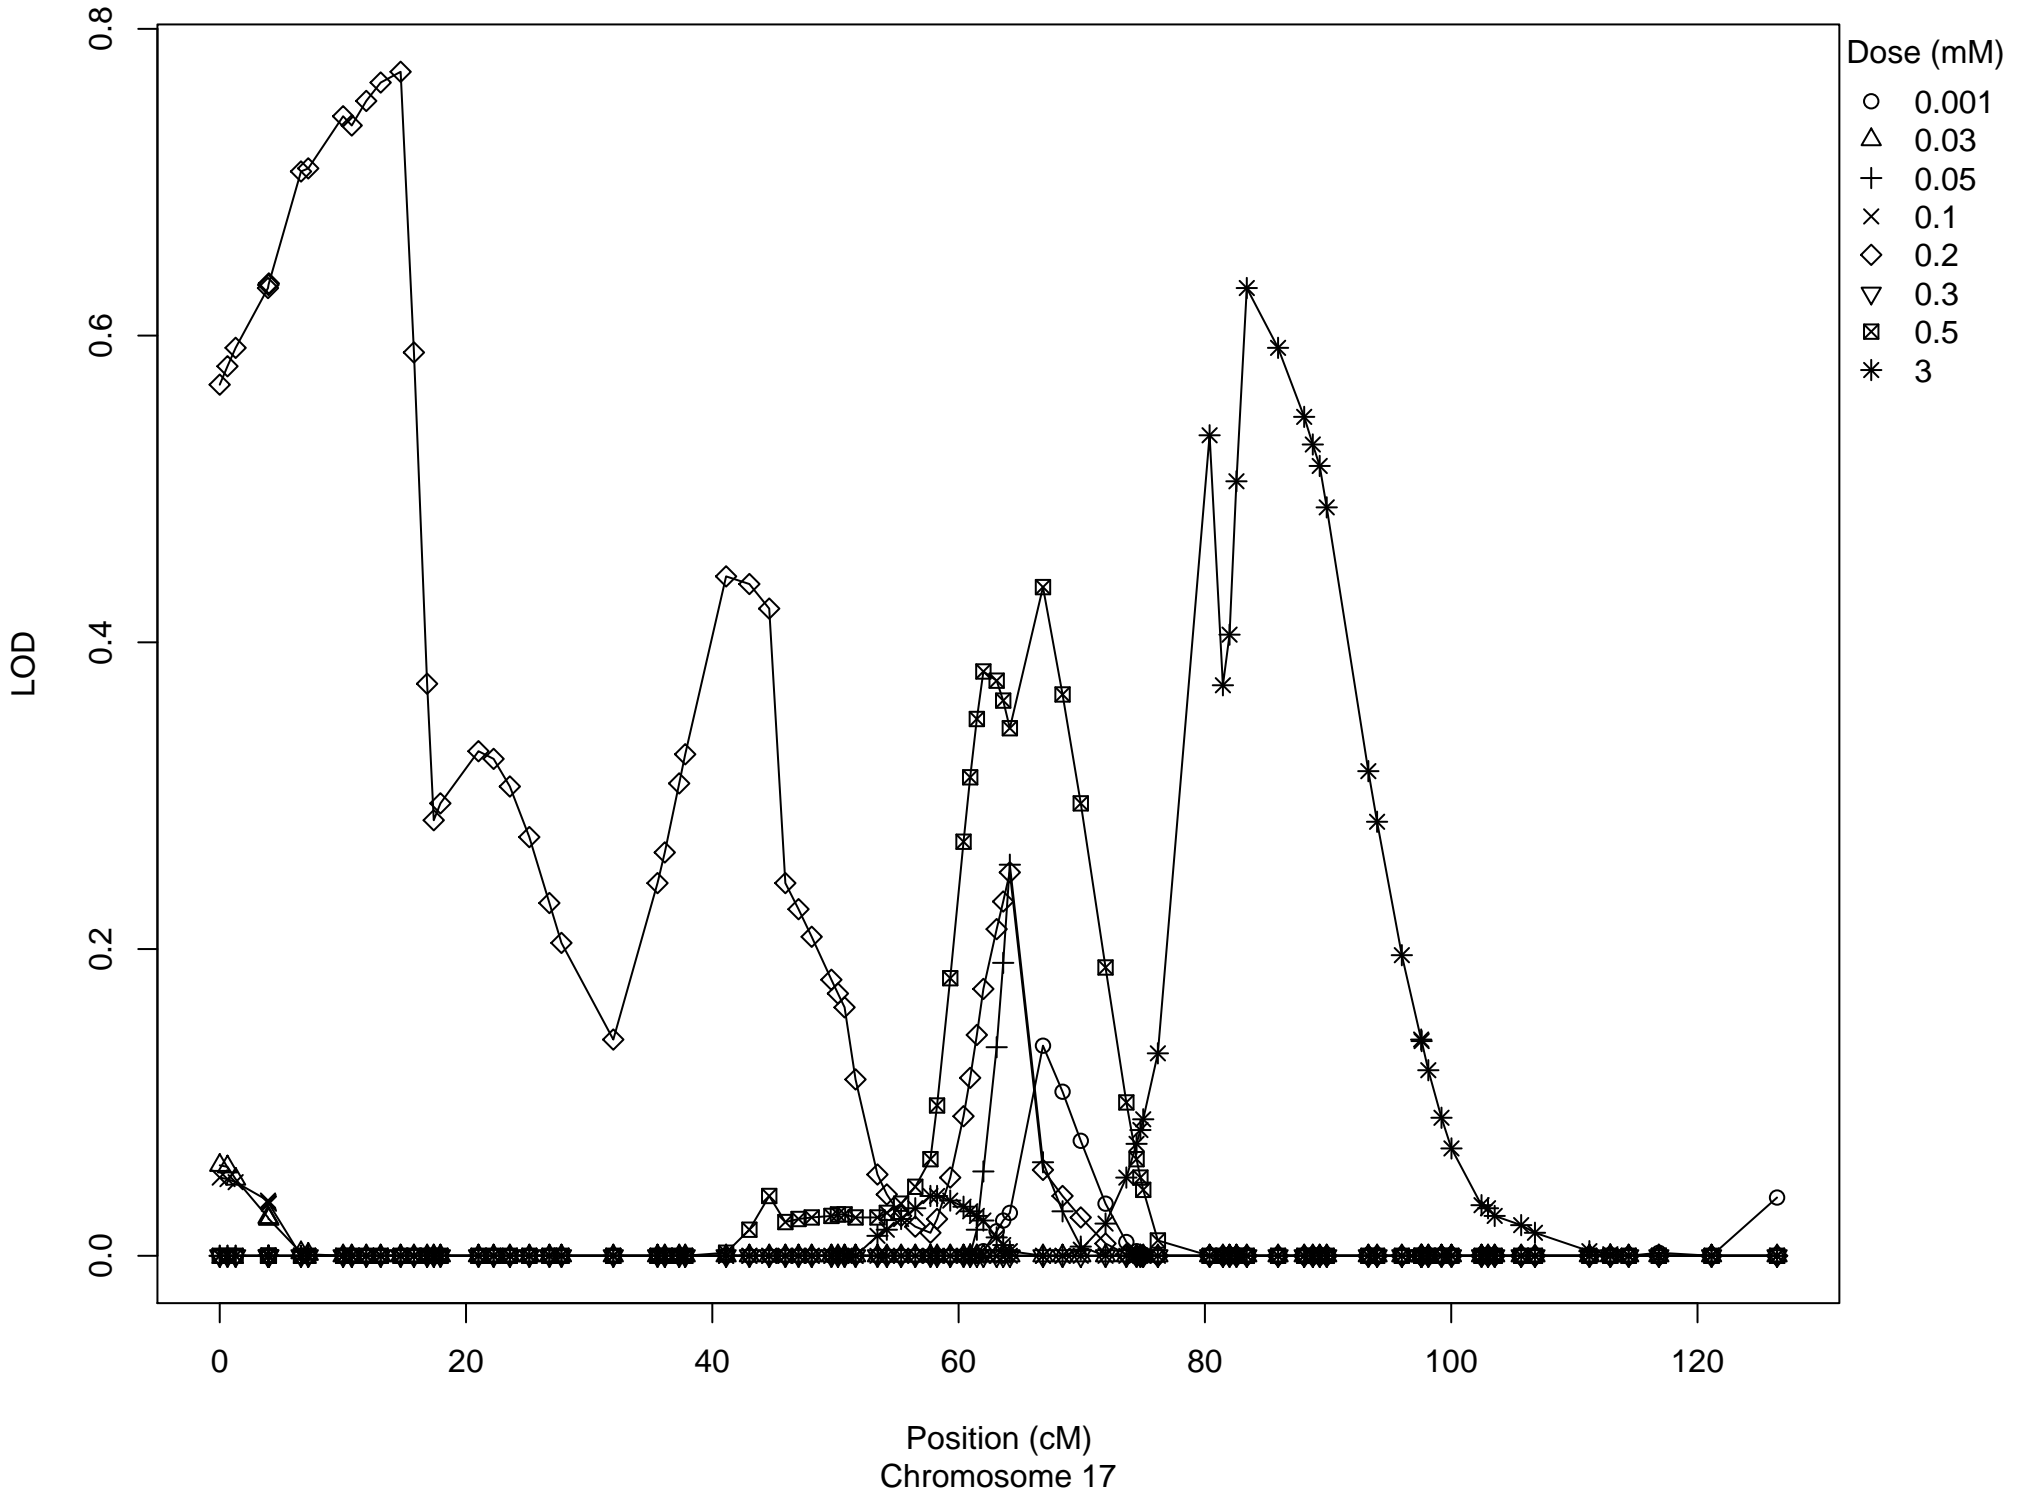







# 84A1 (84A1)

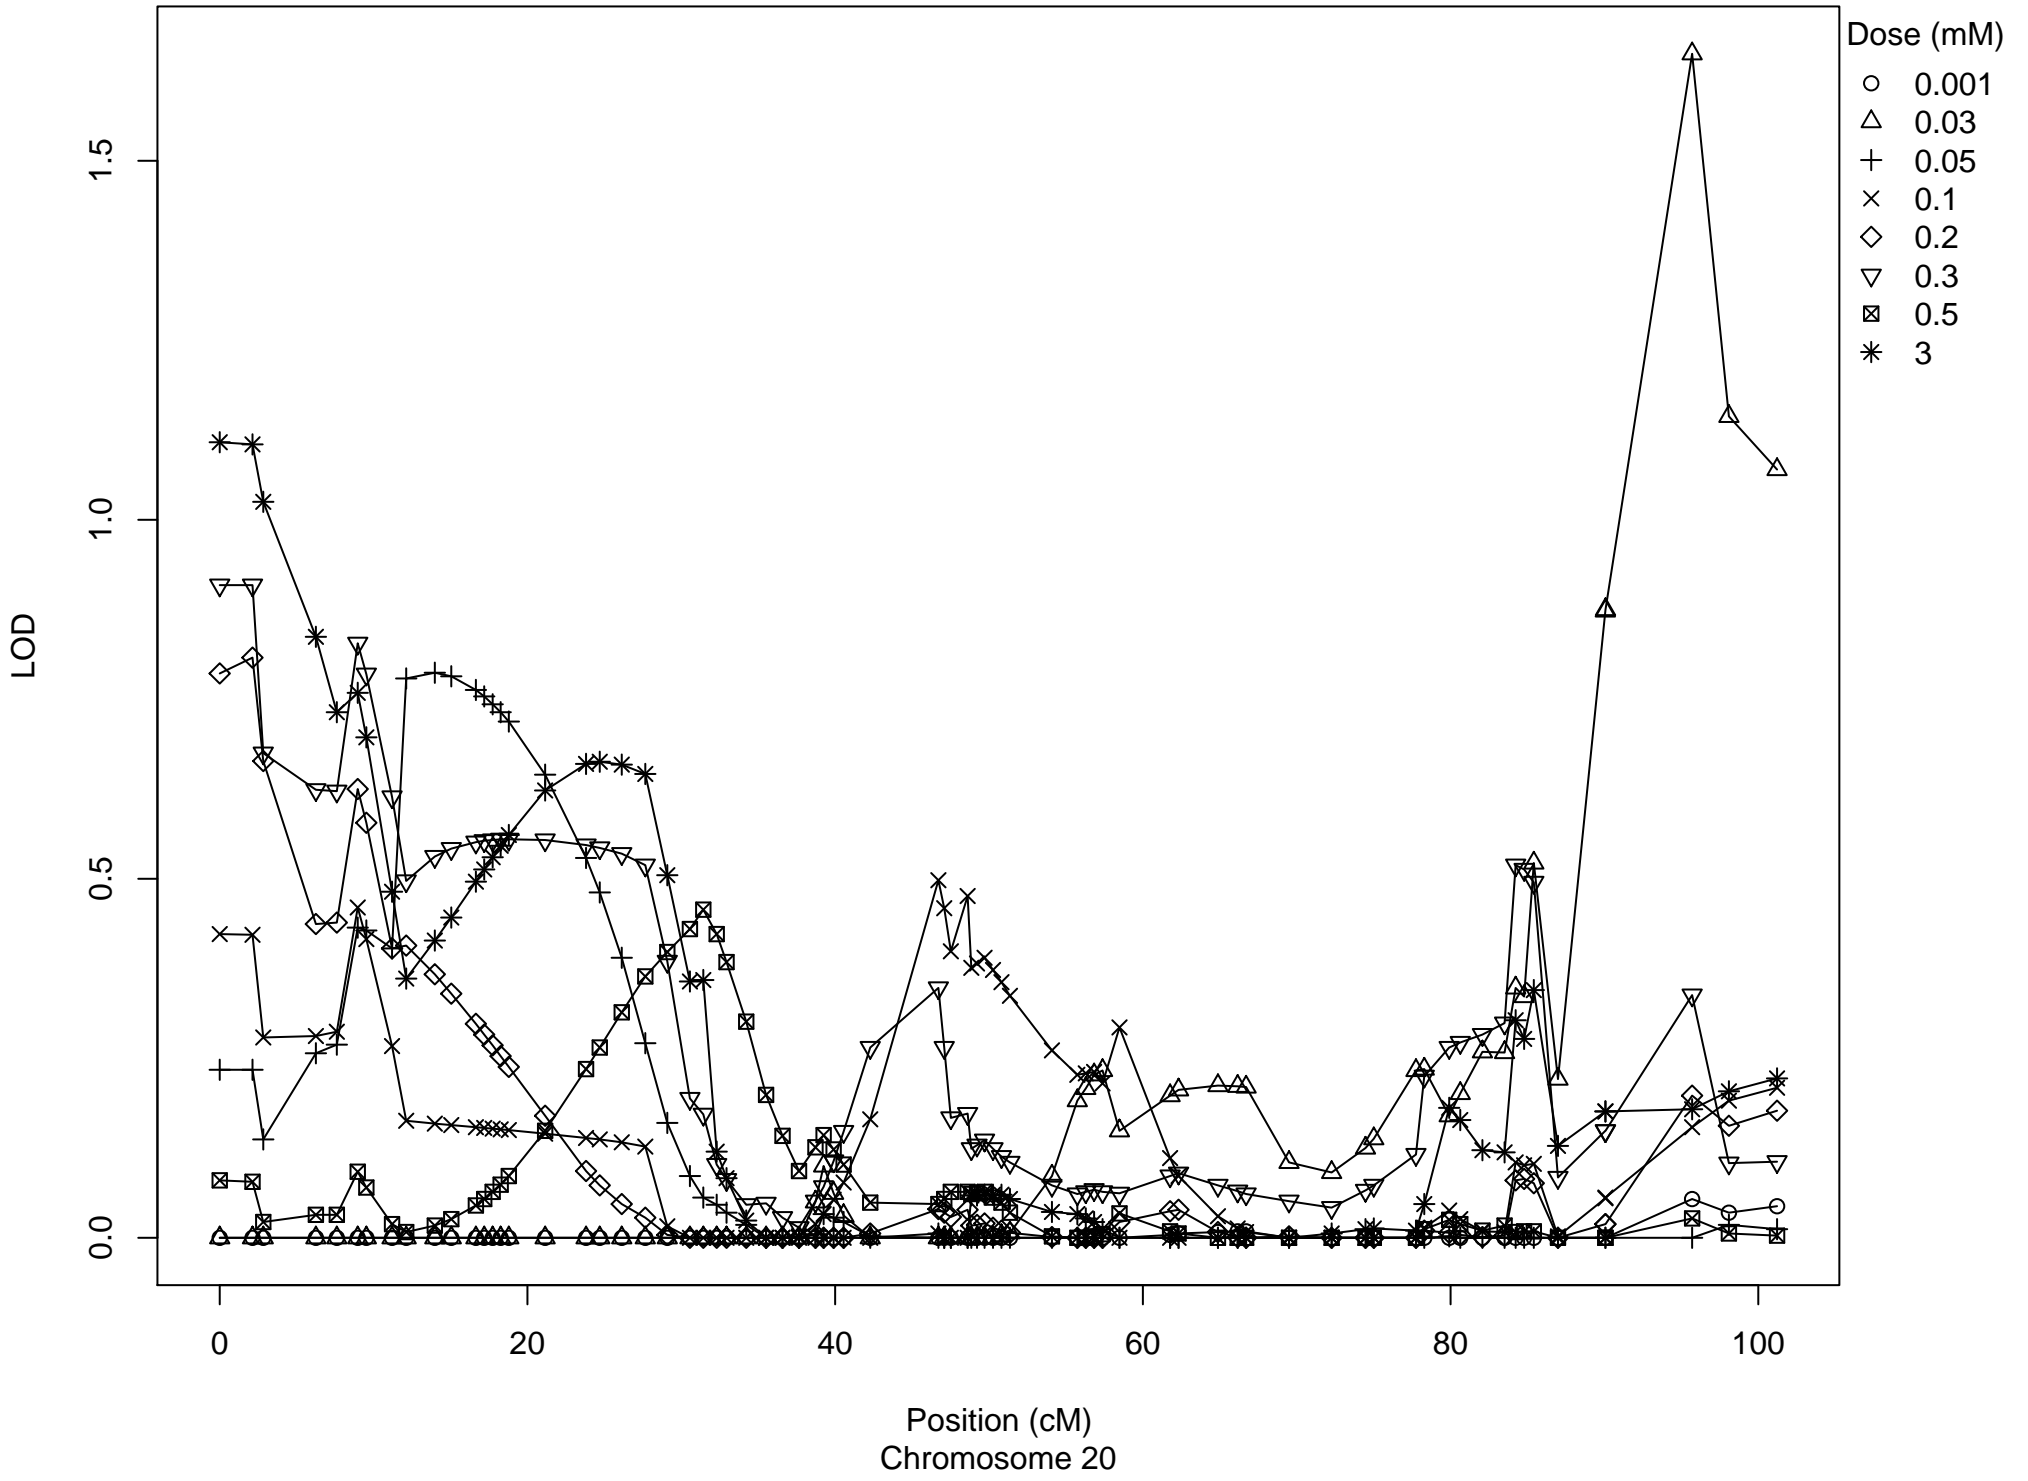

# 84A1 (84A1)

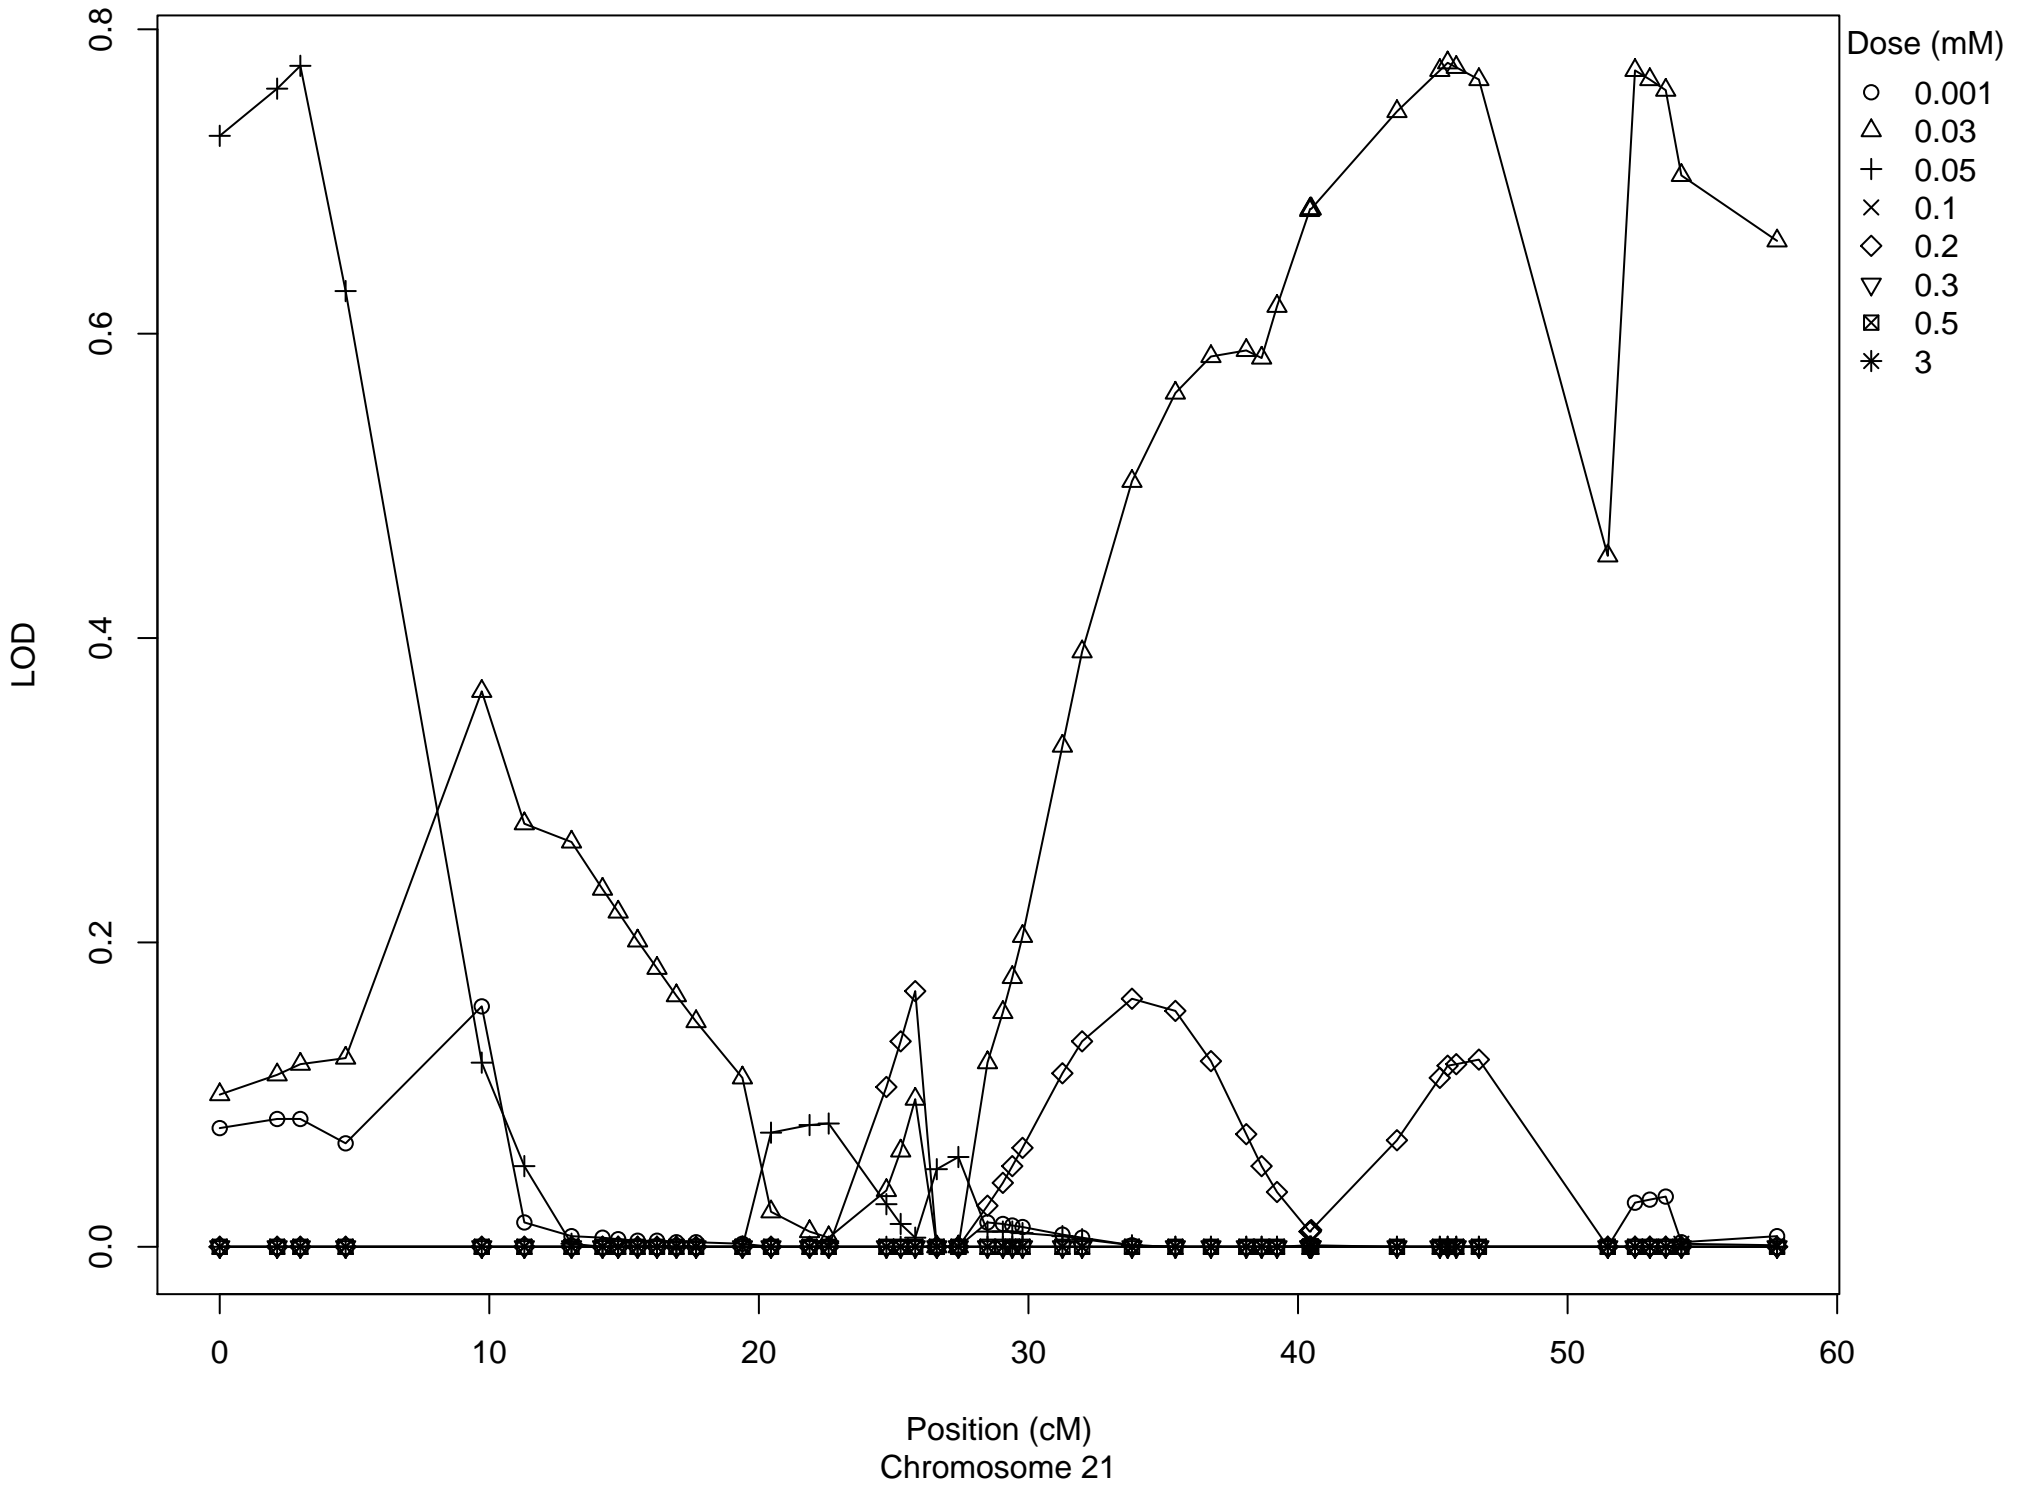



# 85A1 (85A1)

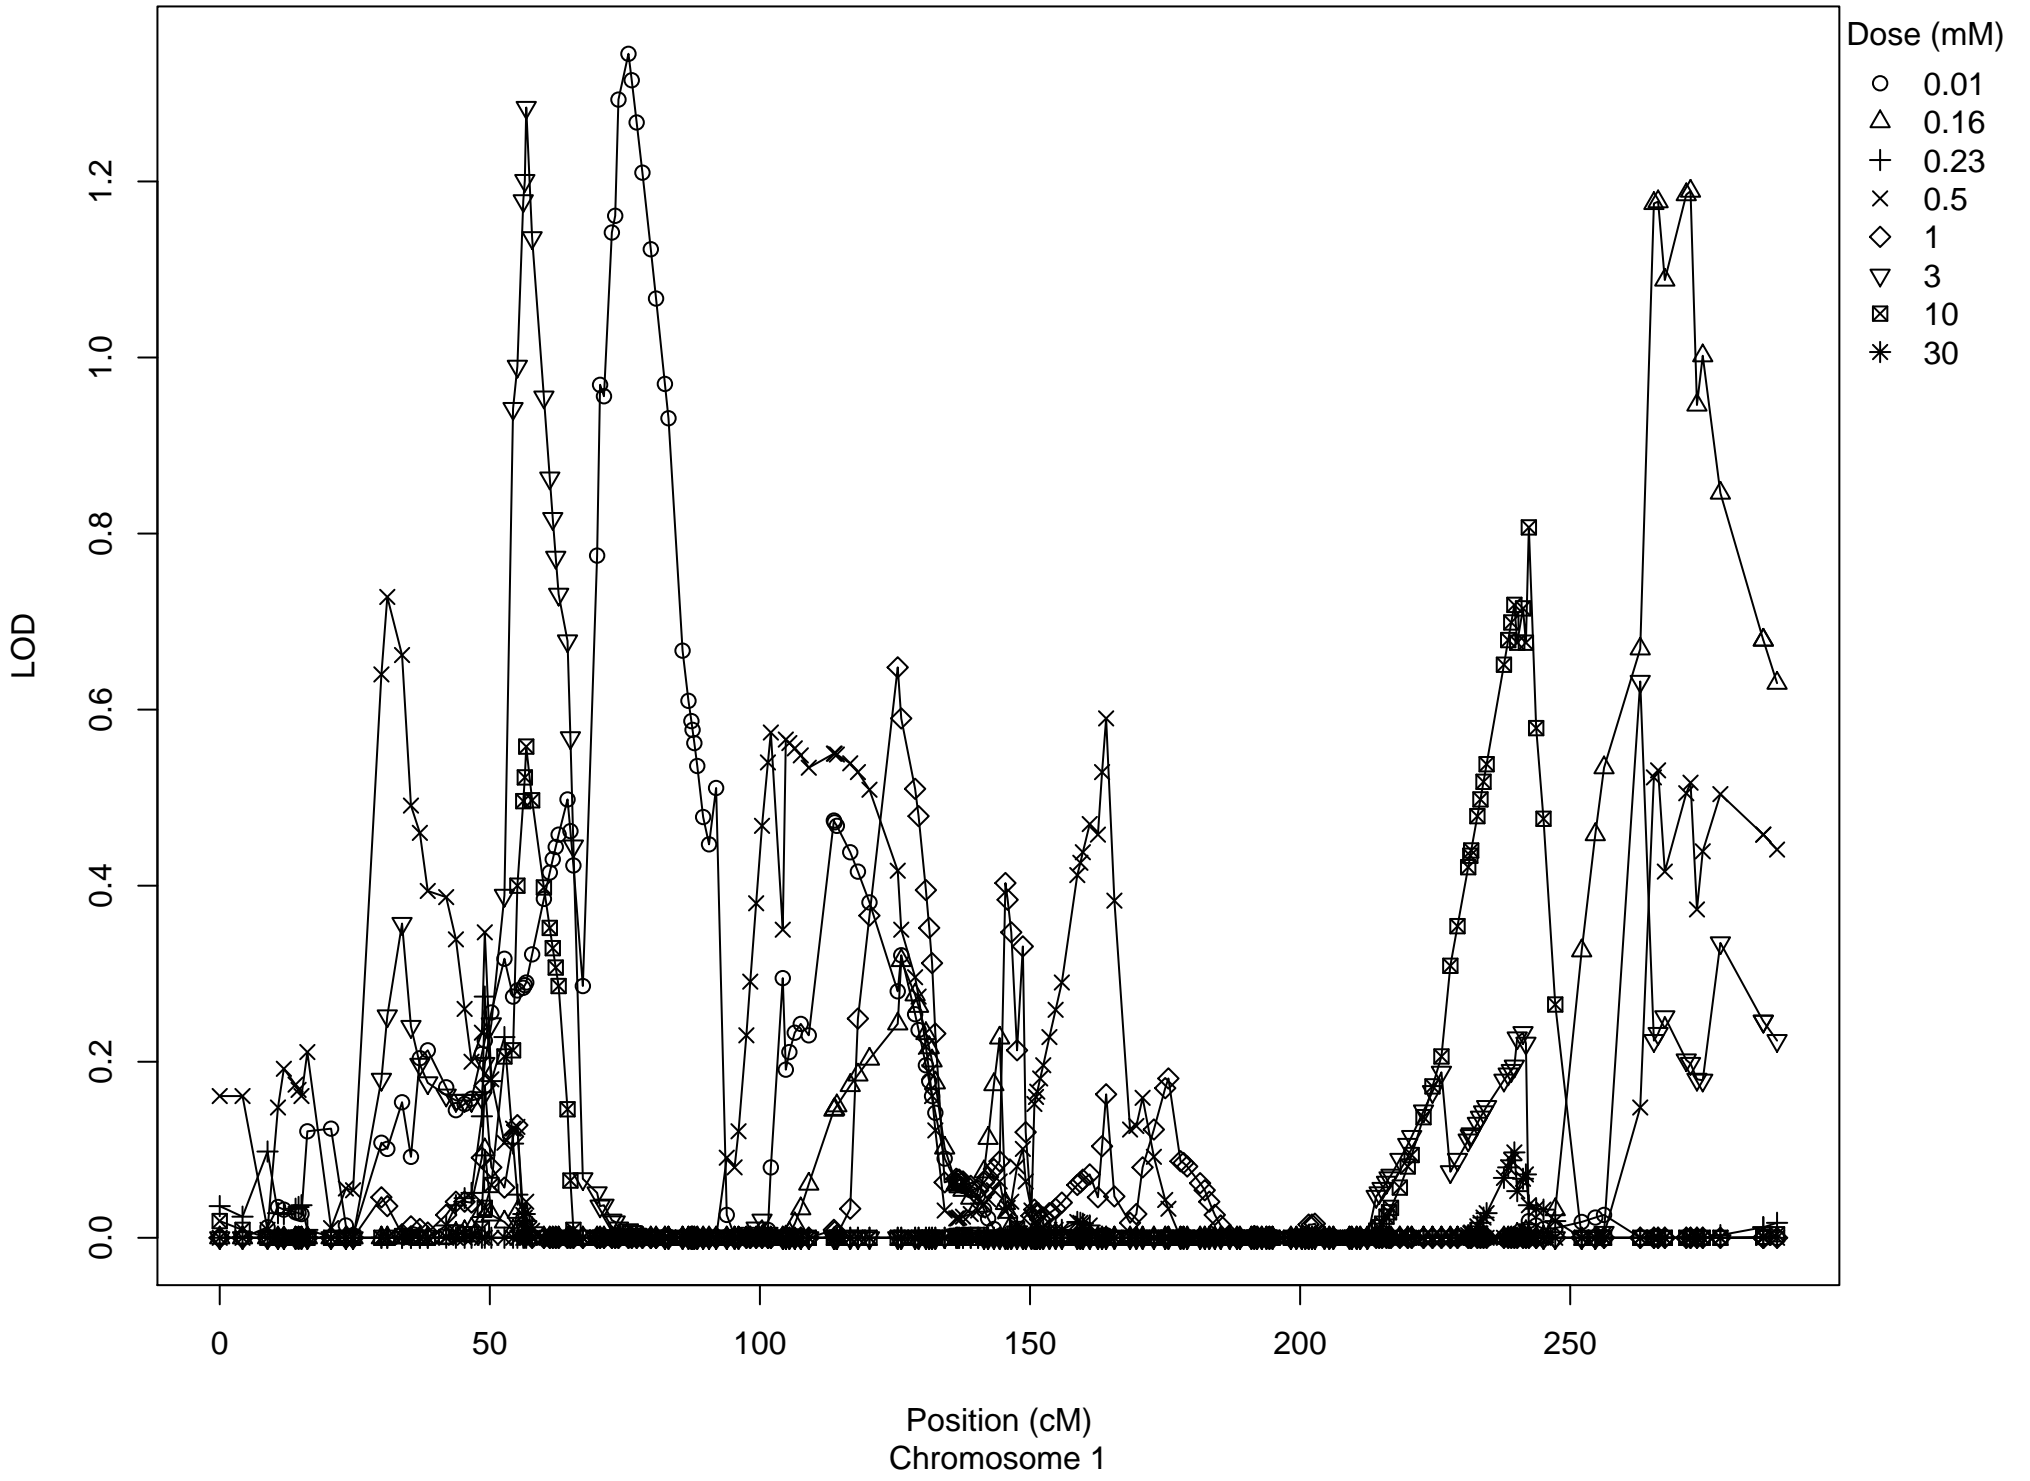

# 85A1 (85A1)

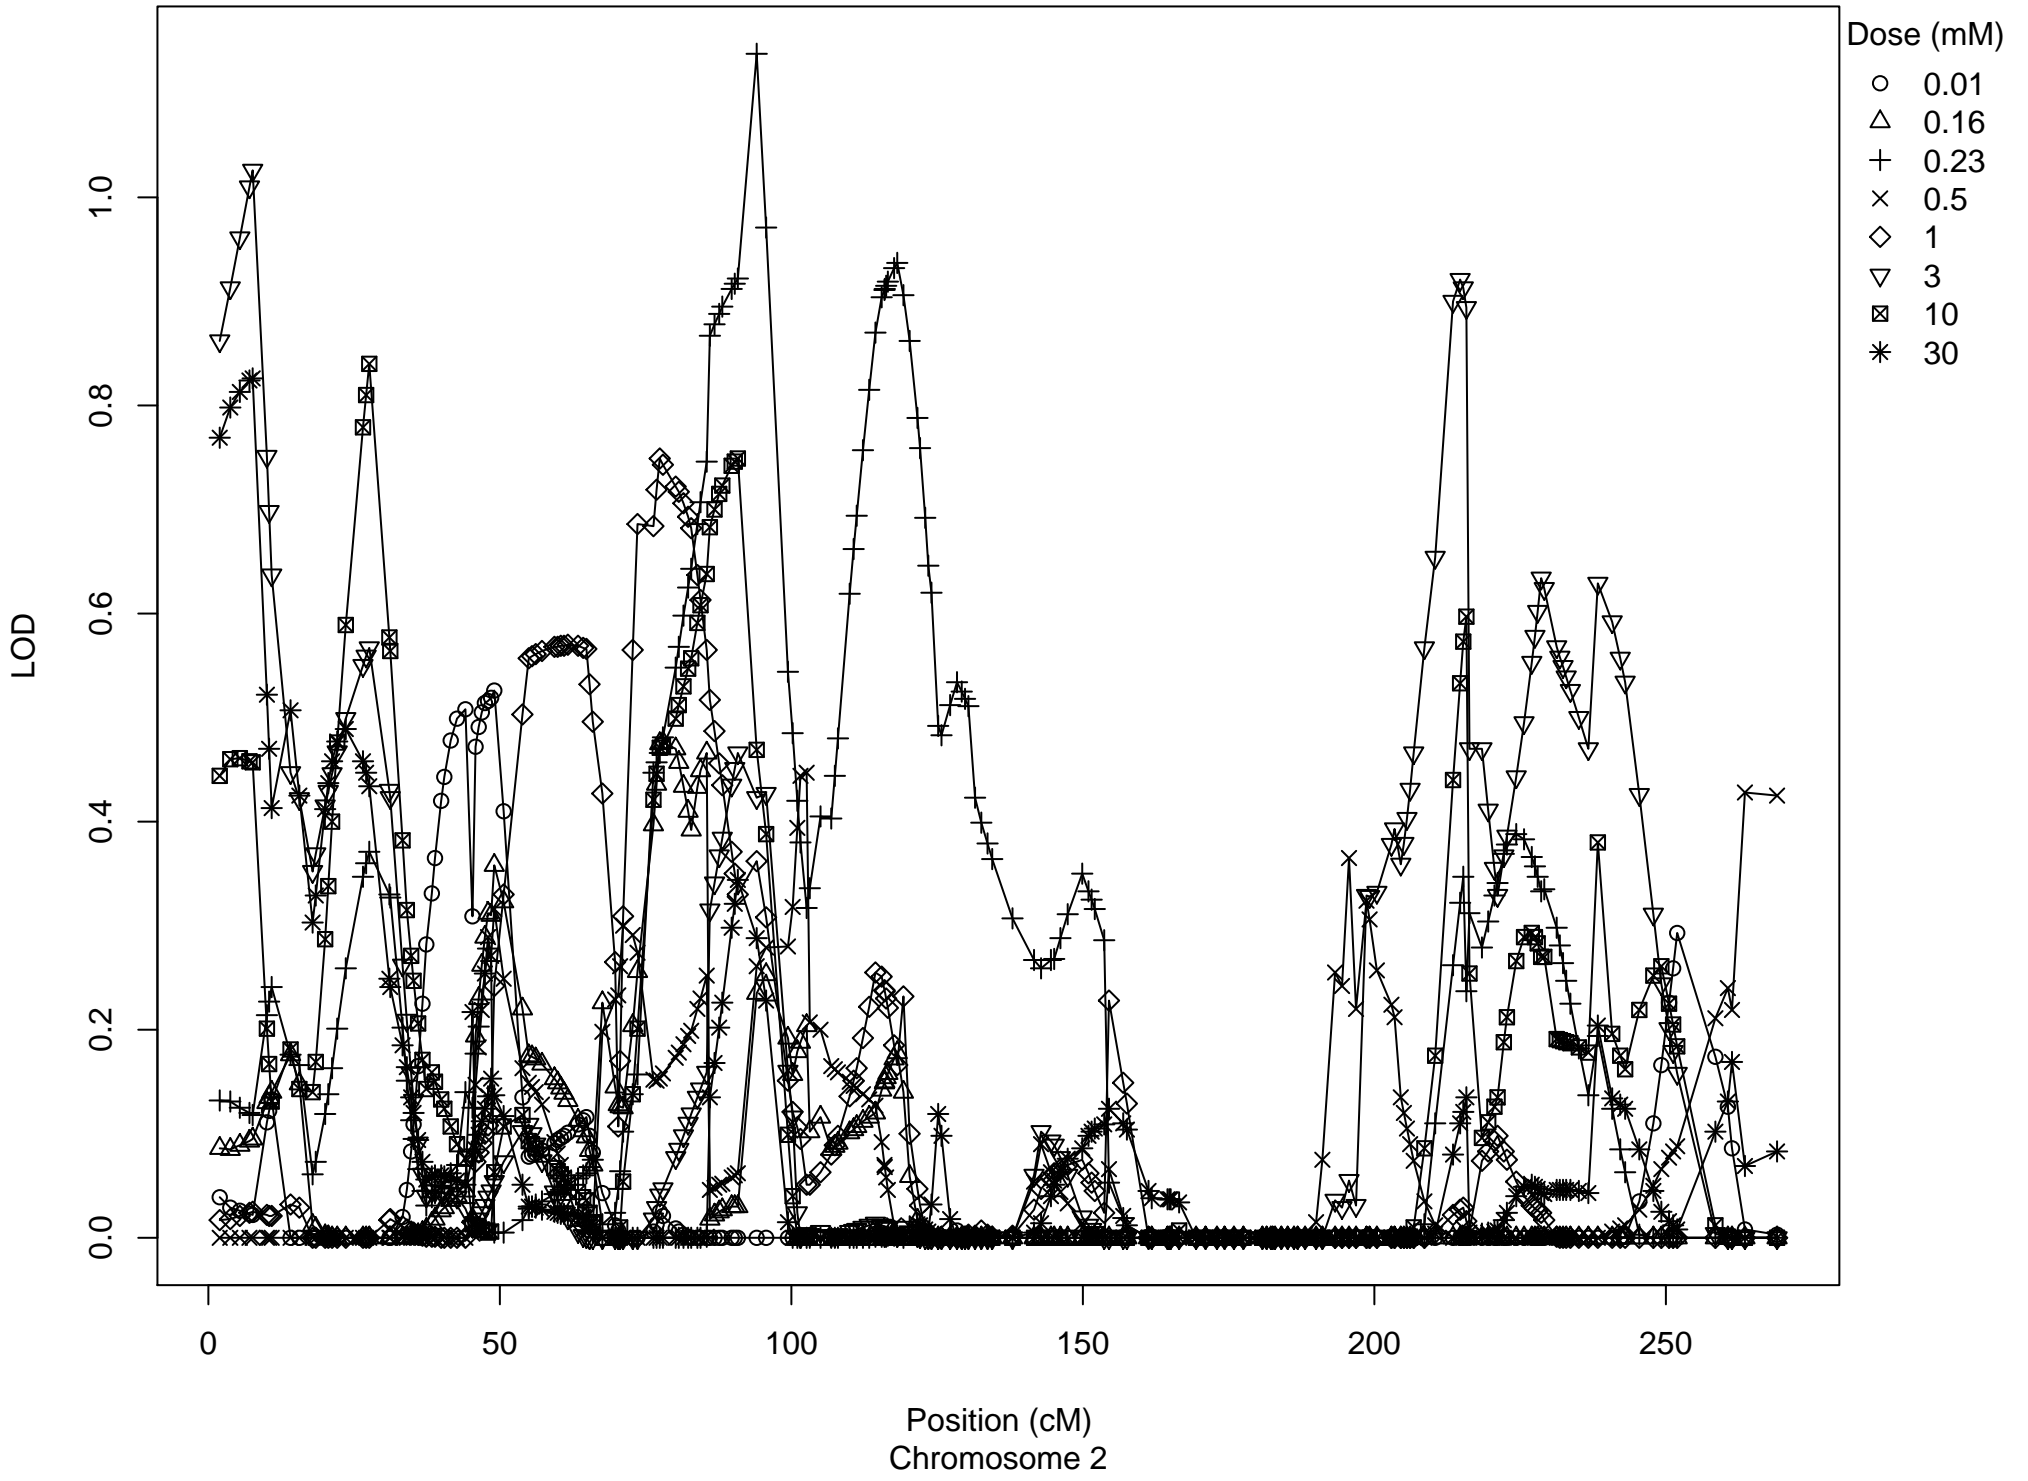

# 85A1 (85A1)

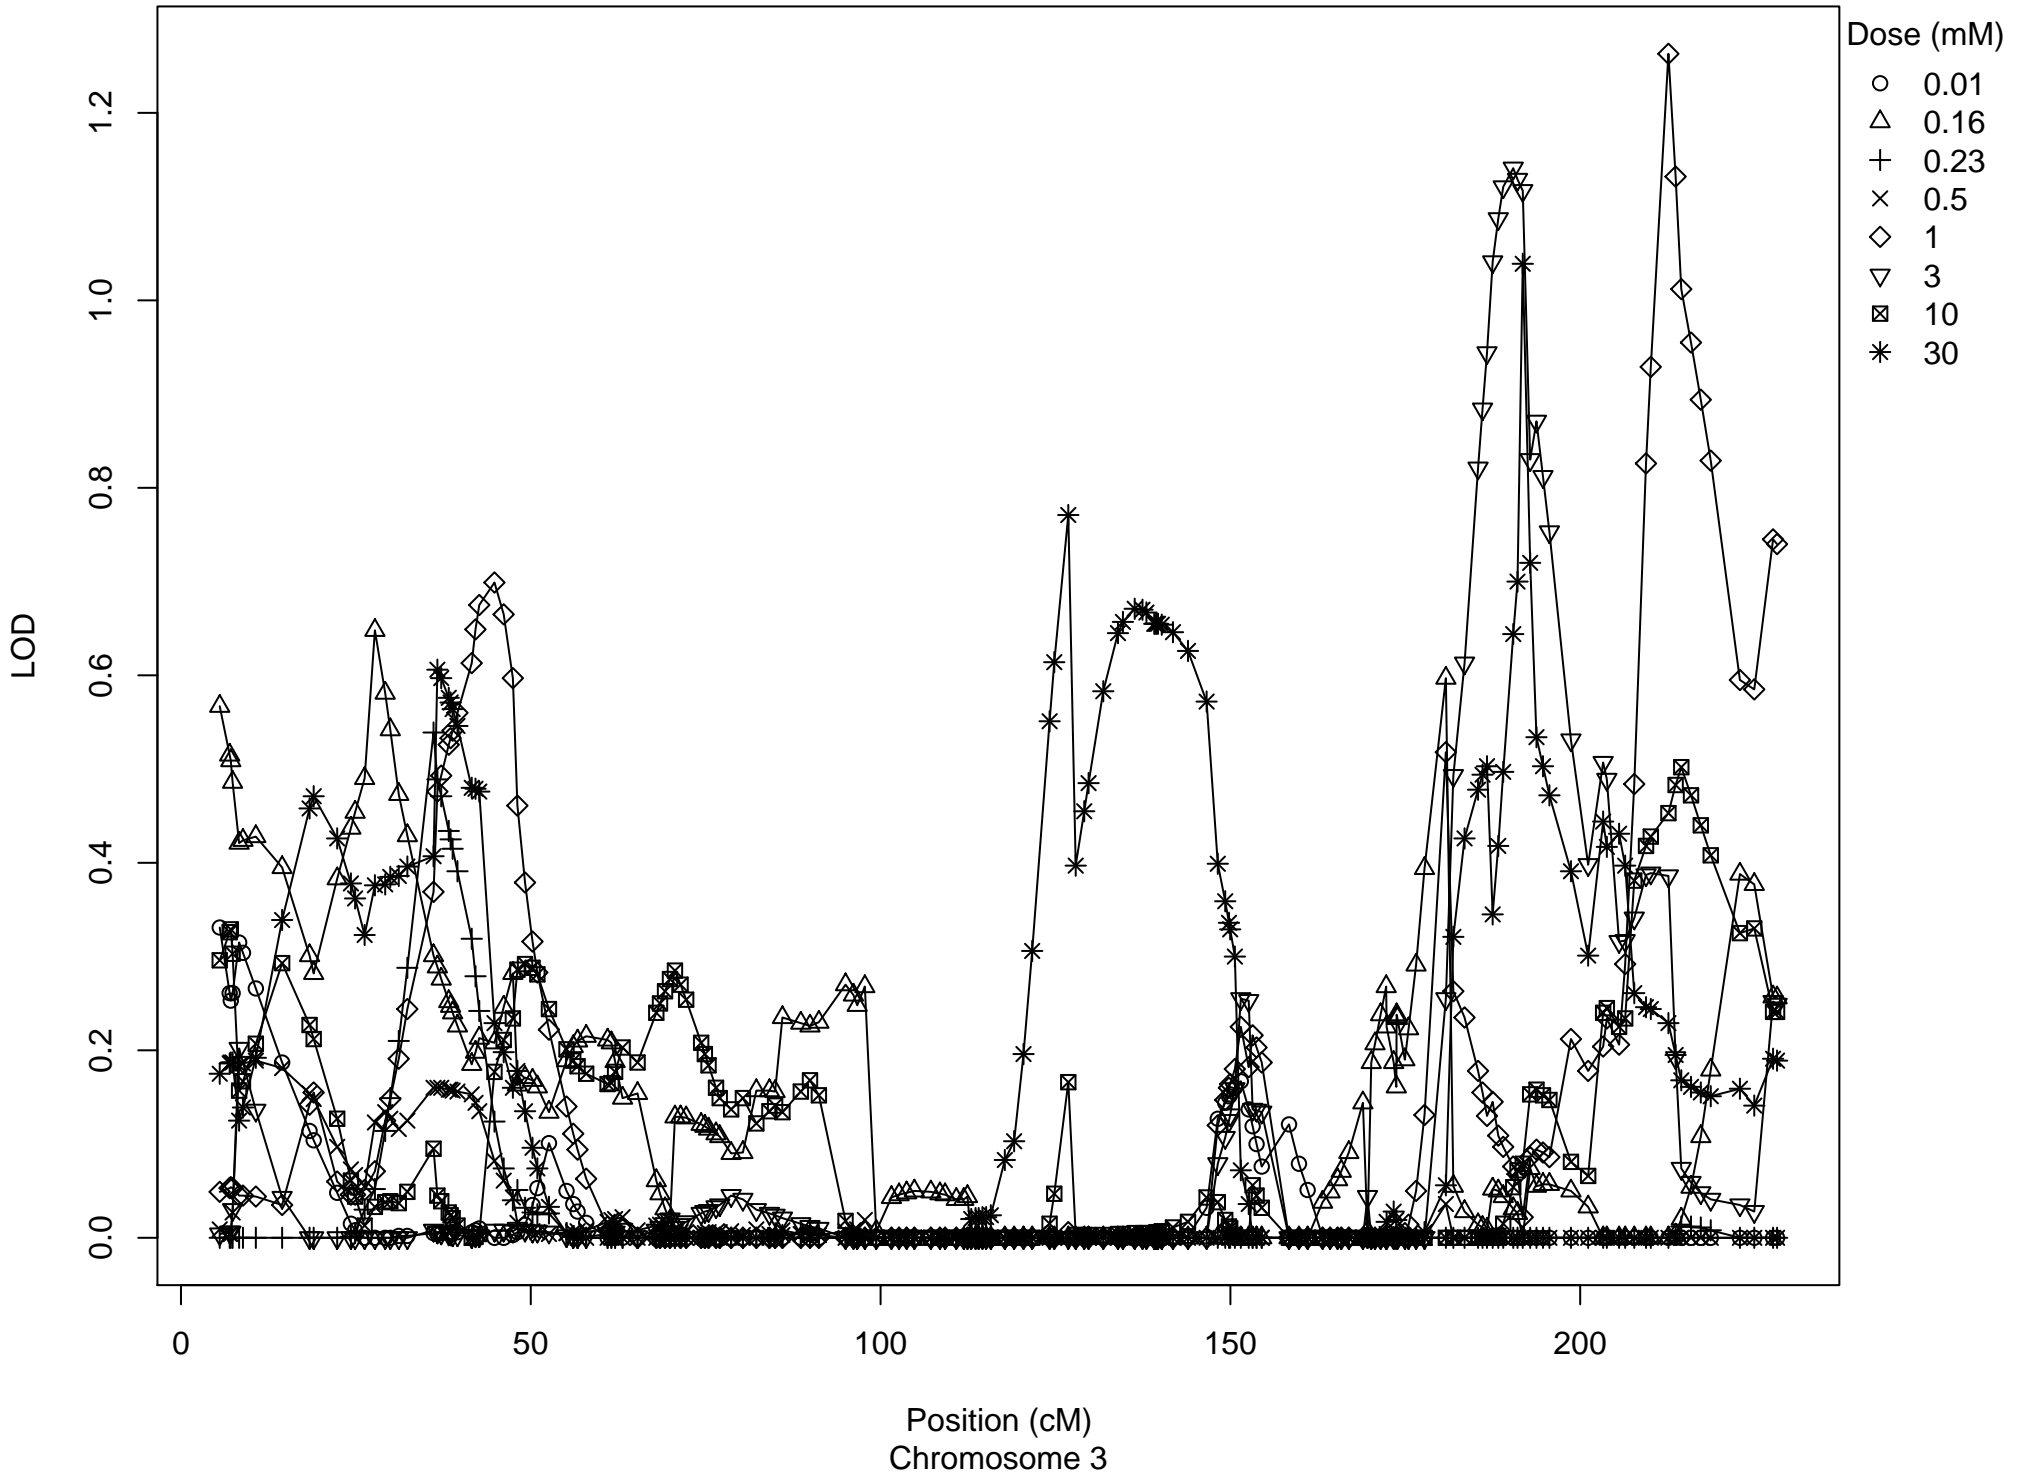

# 85A1 (85A1)

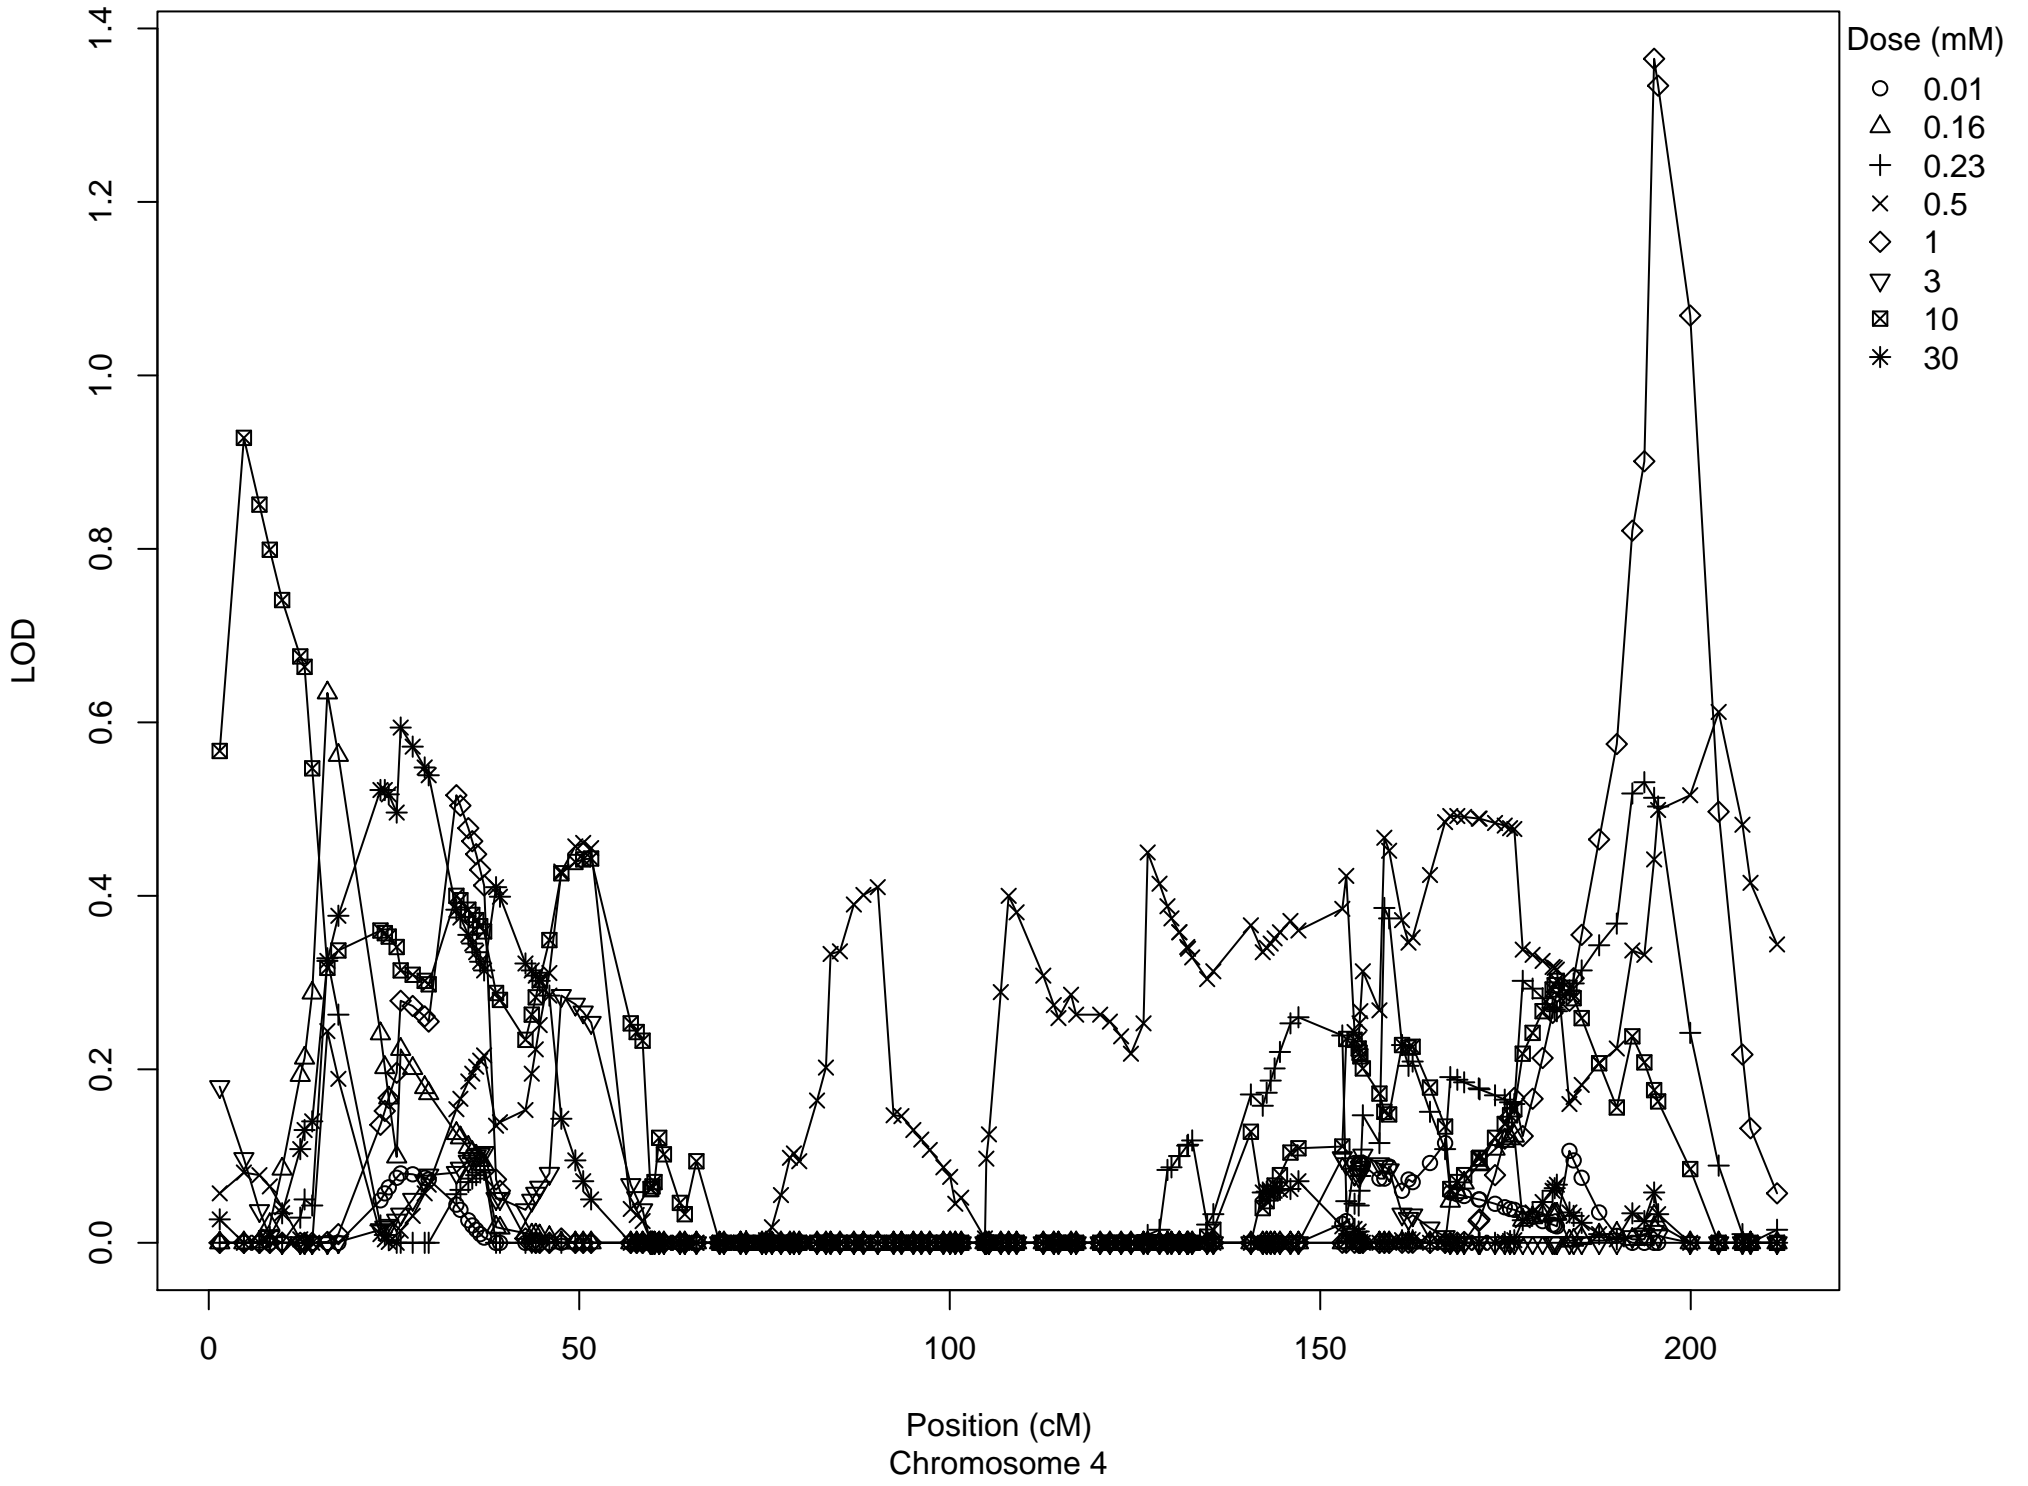





# 85A1 (85A1)

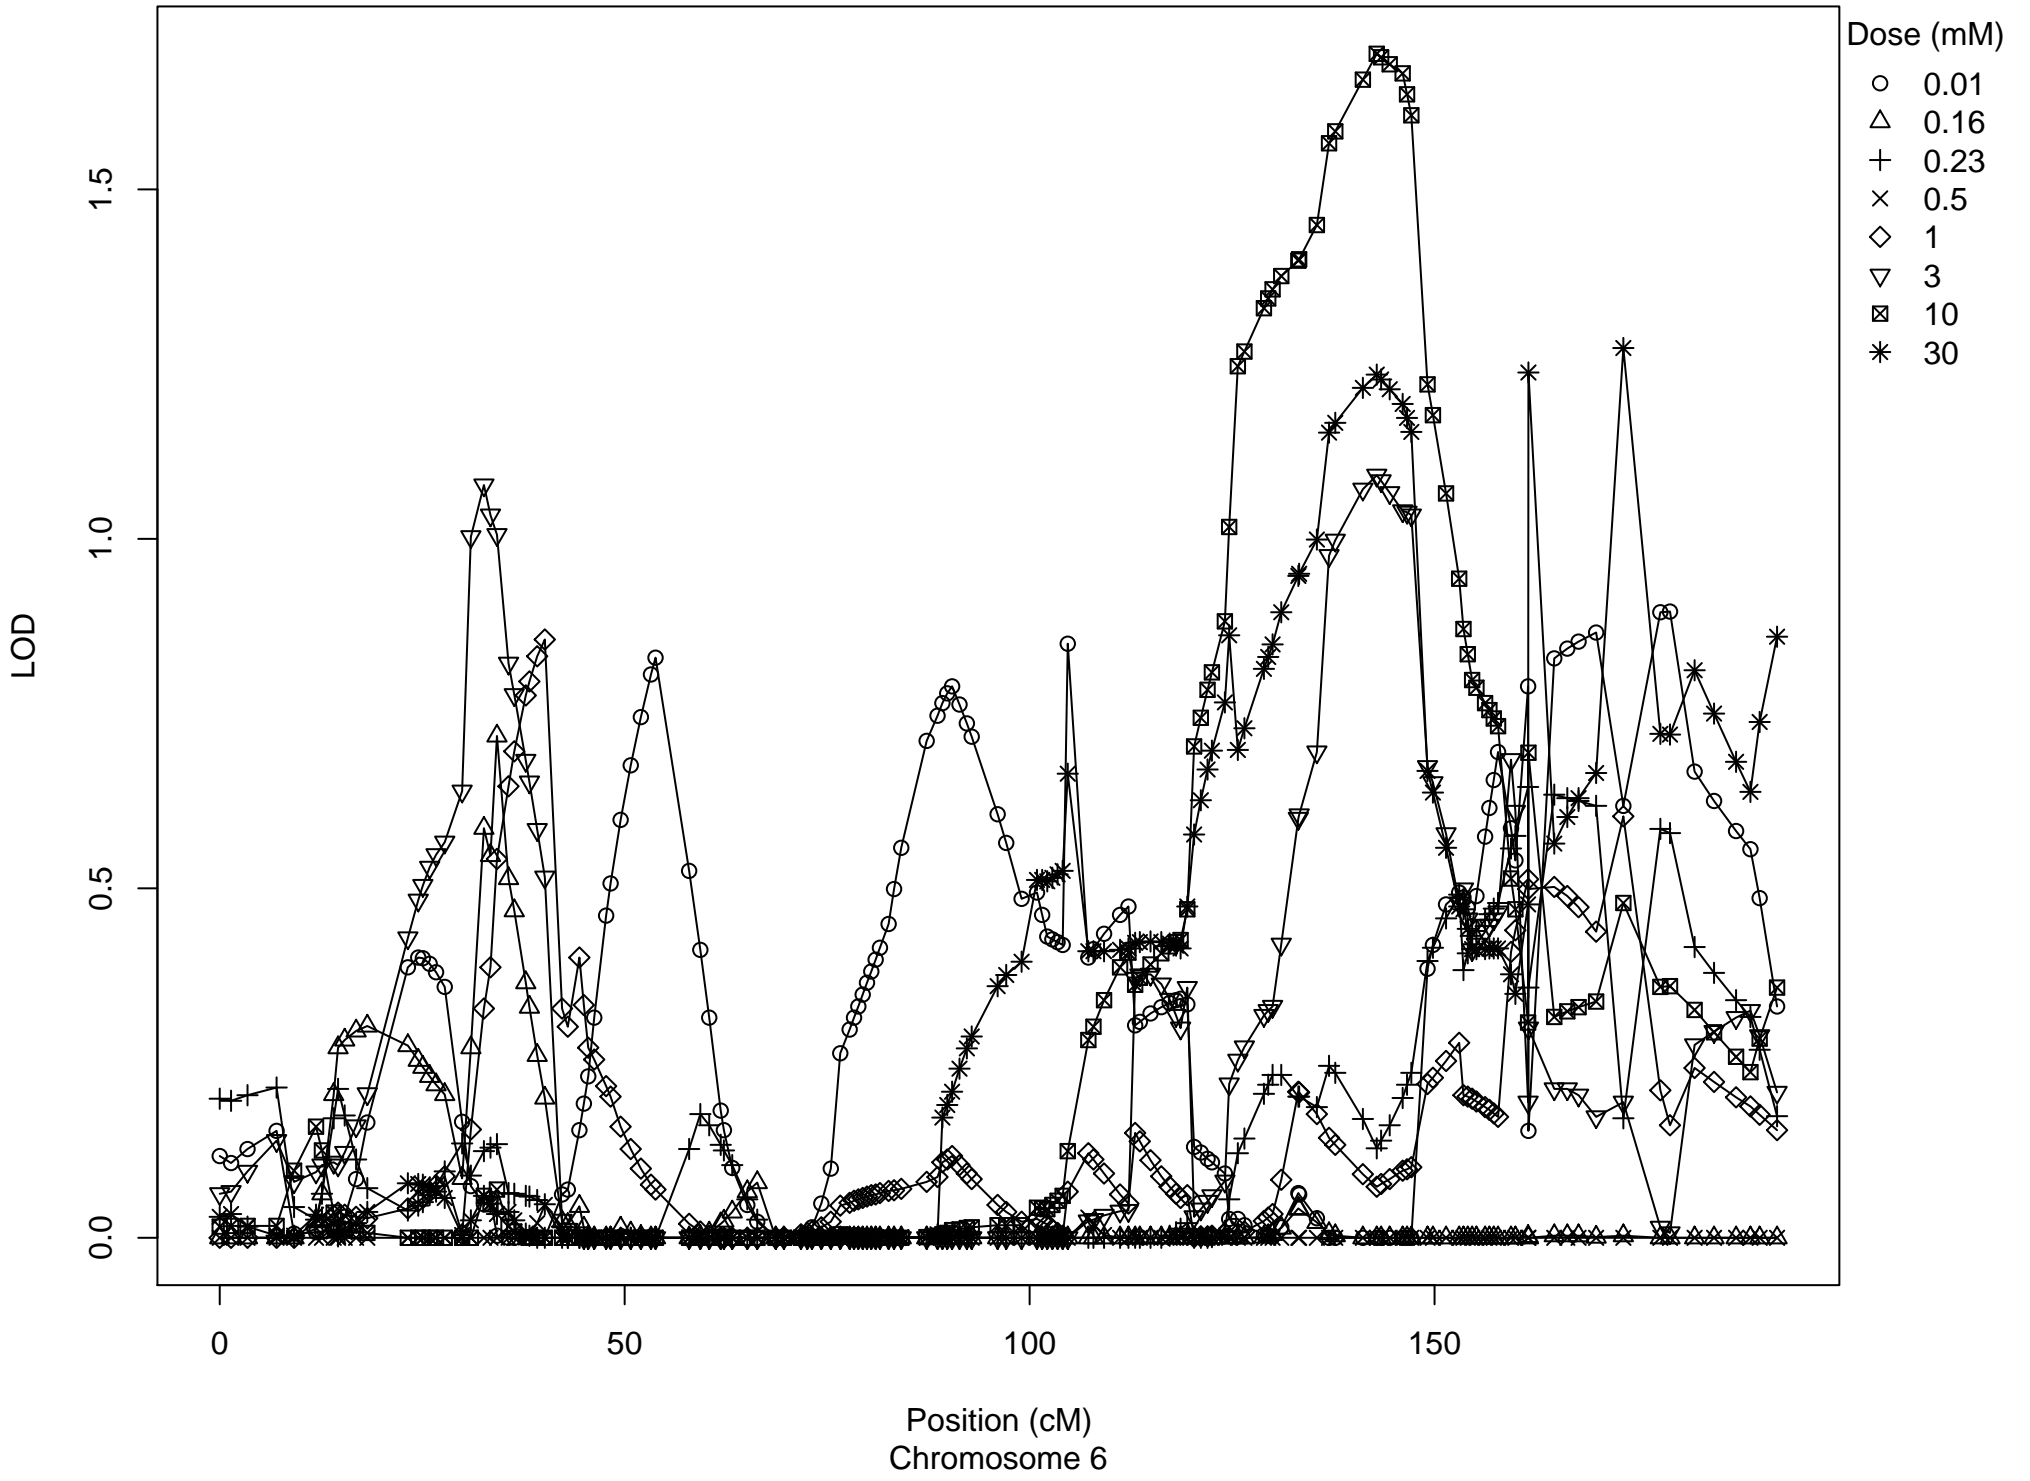

# 85A1 (85A1)

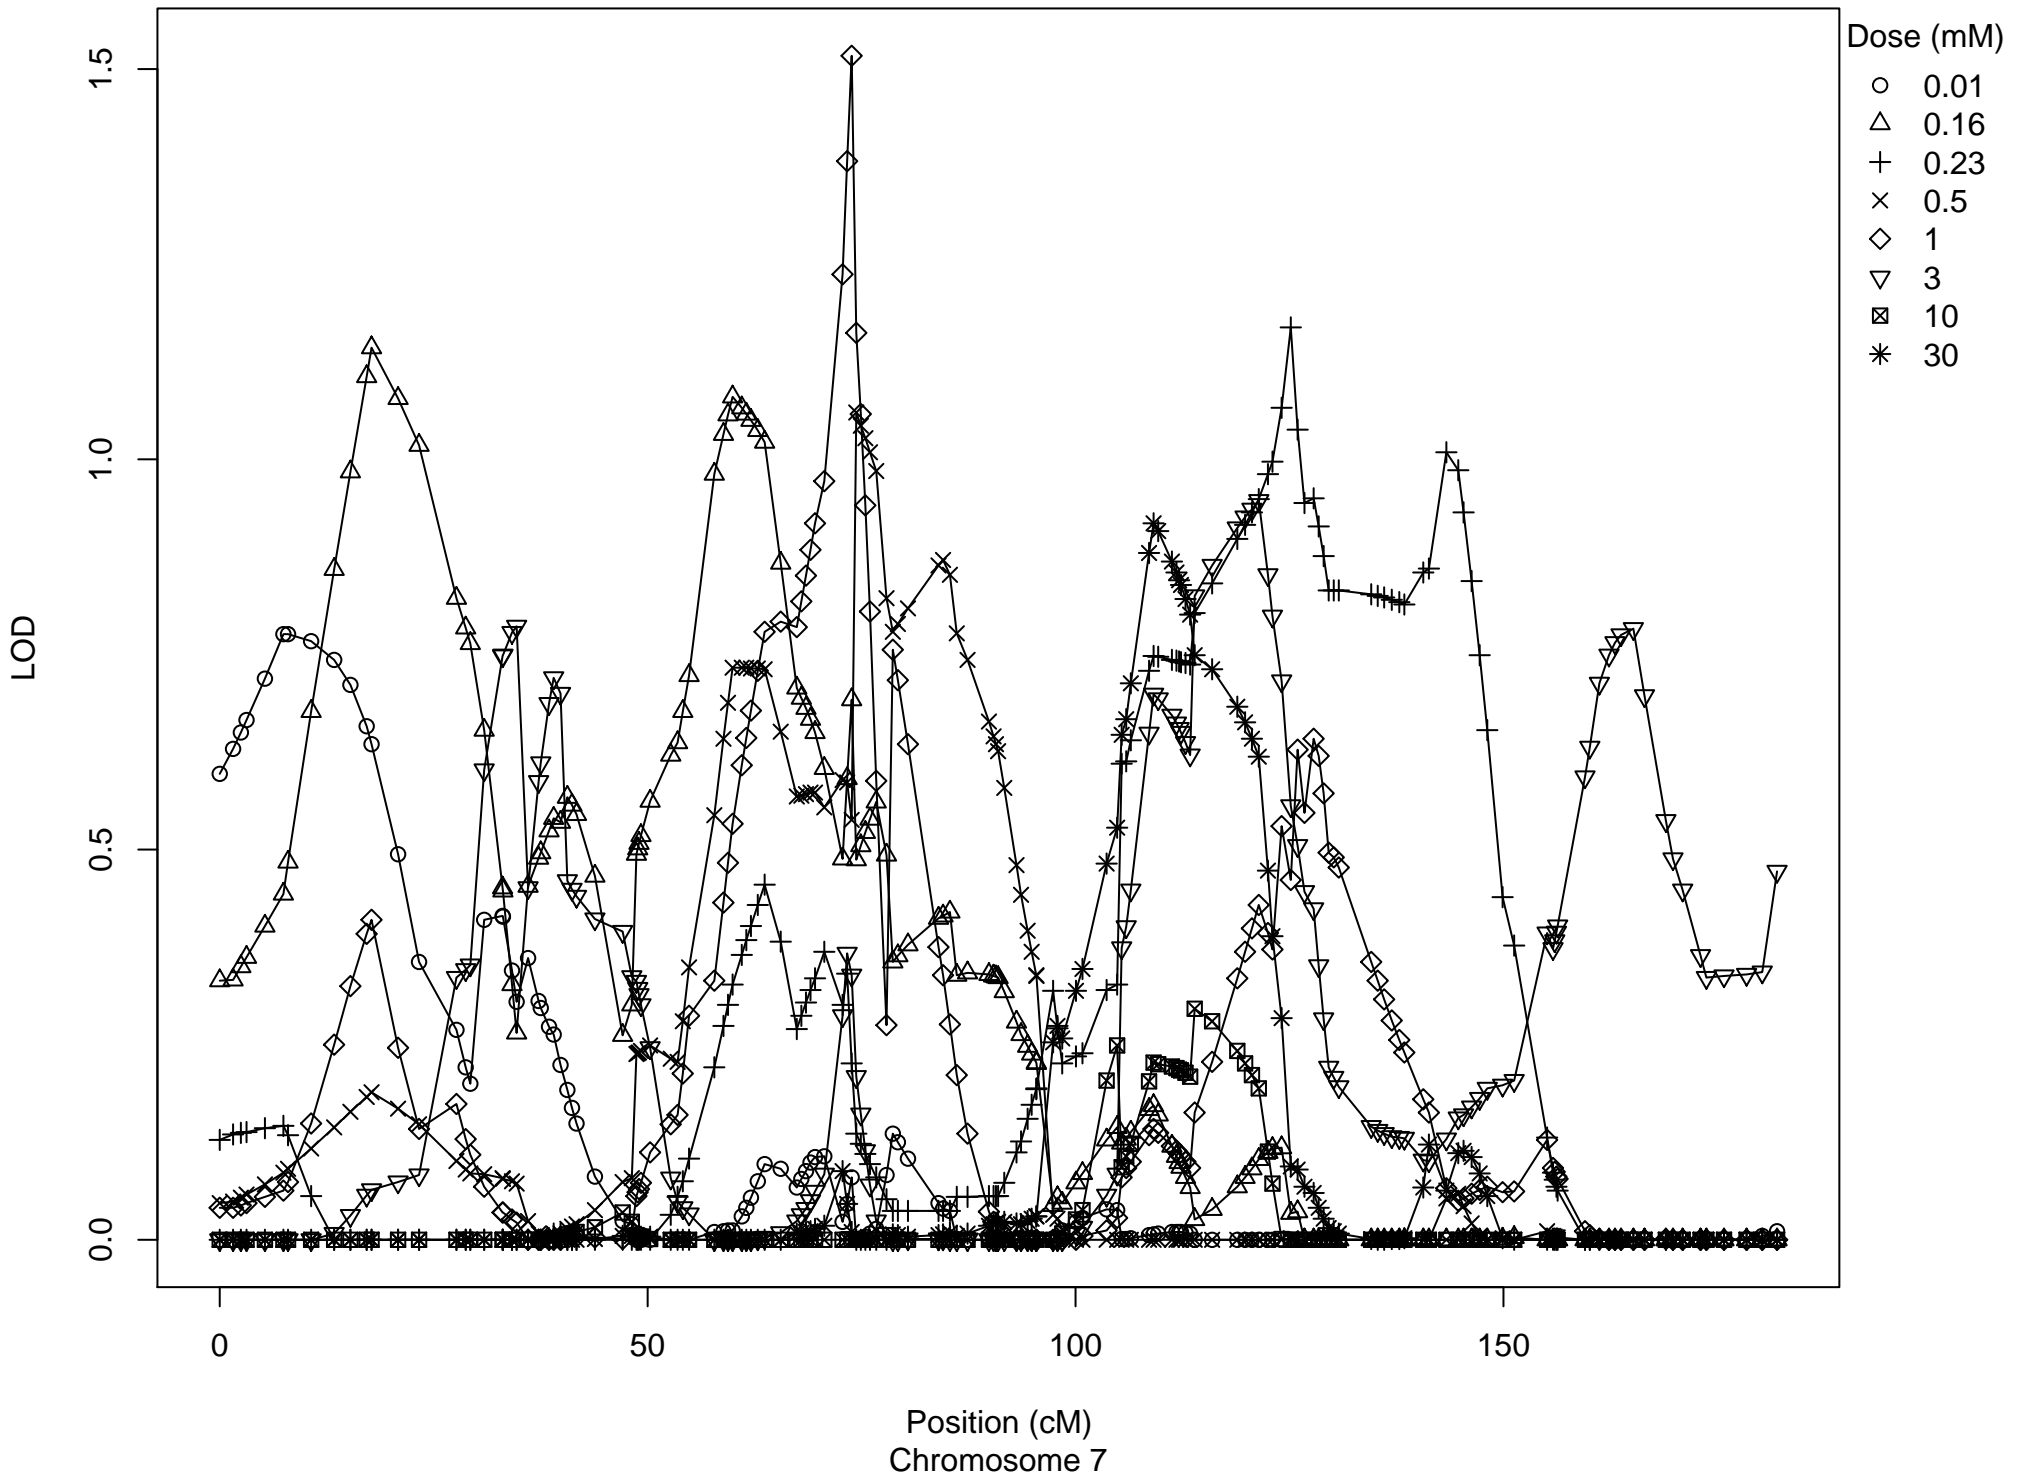



# 85A1 (85A1)

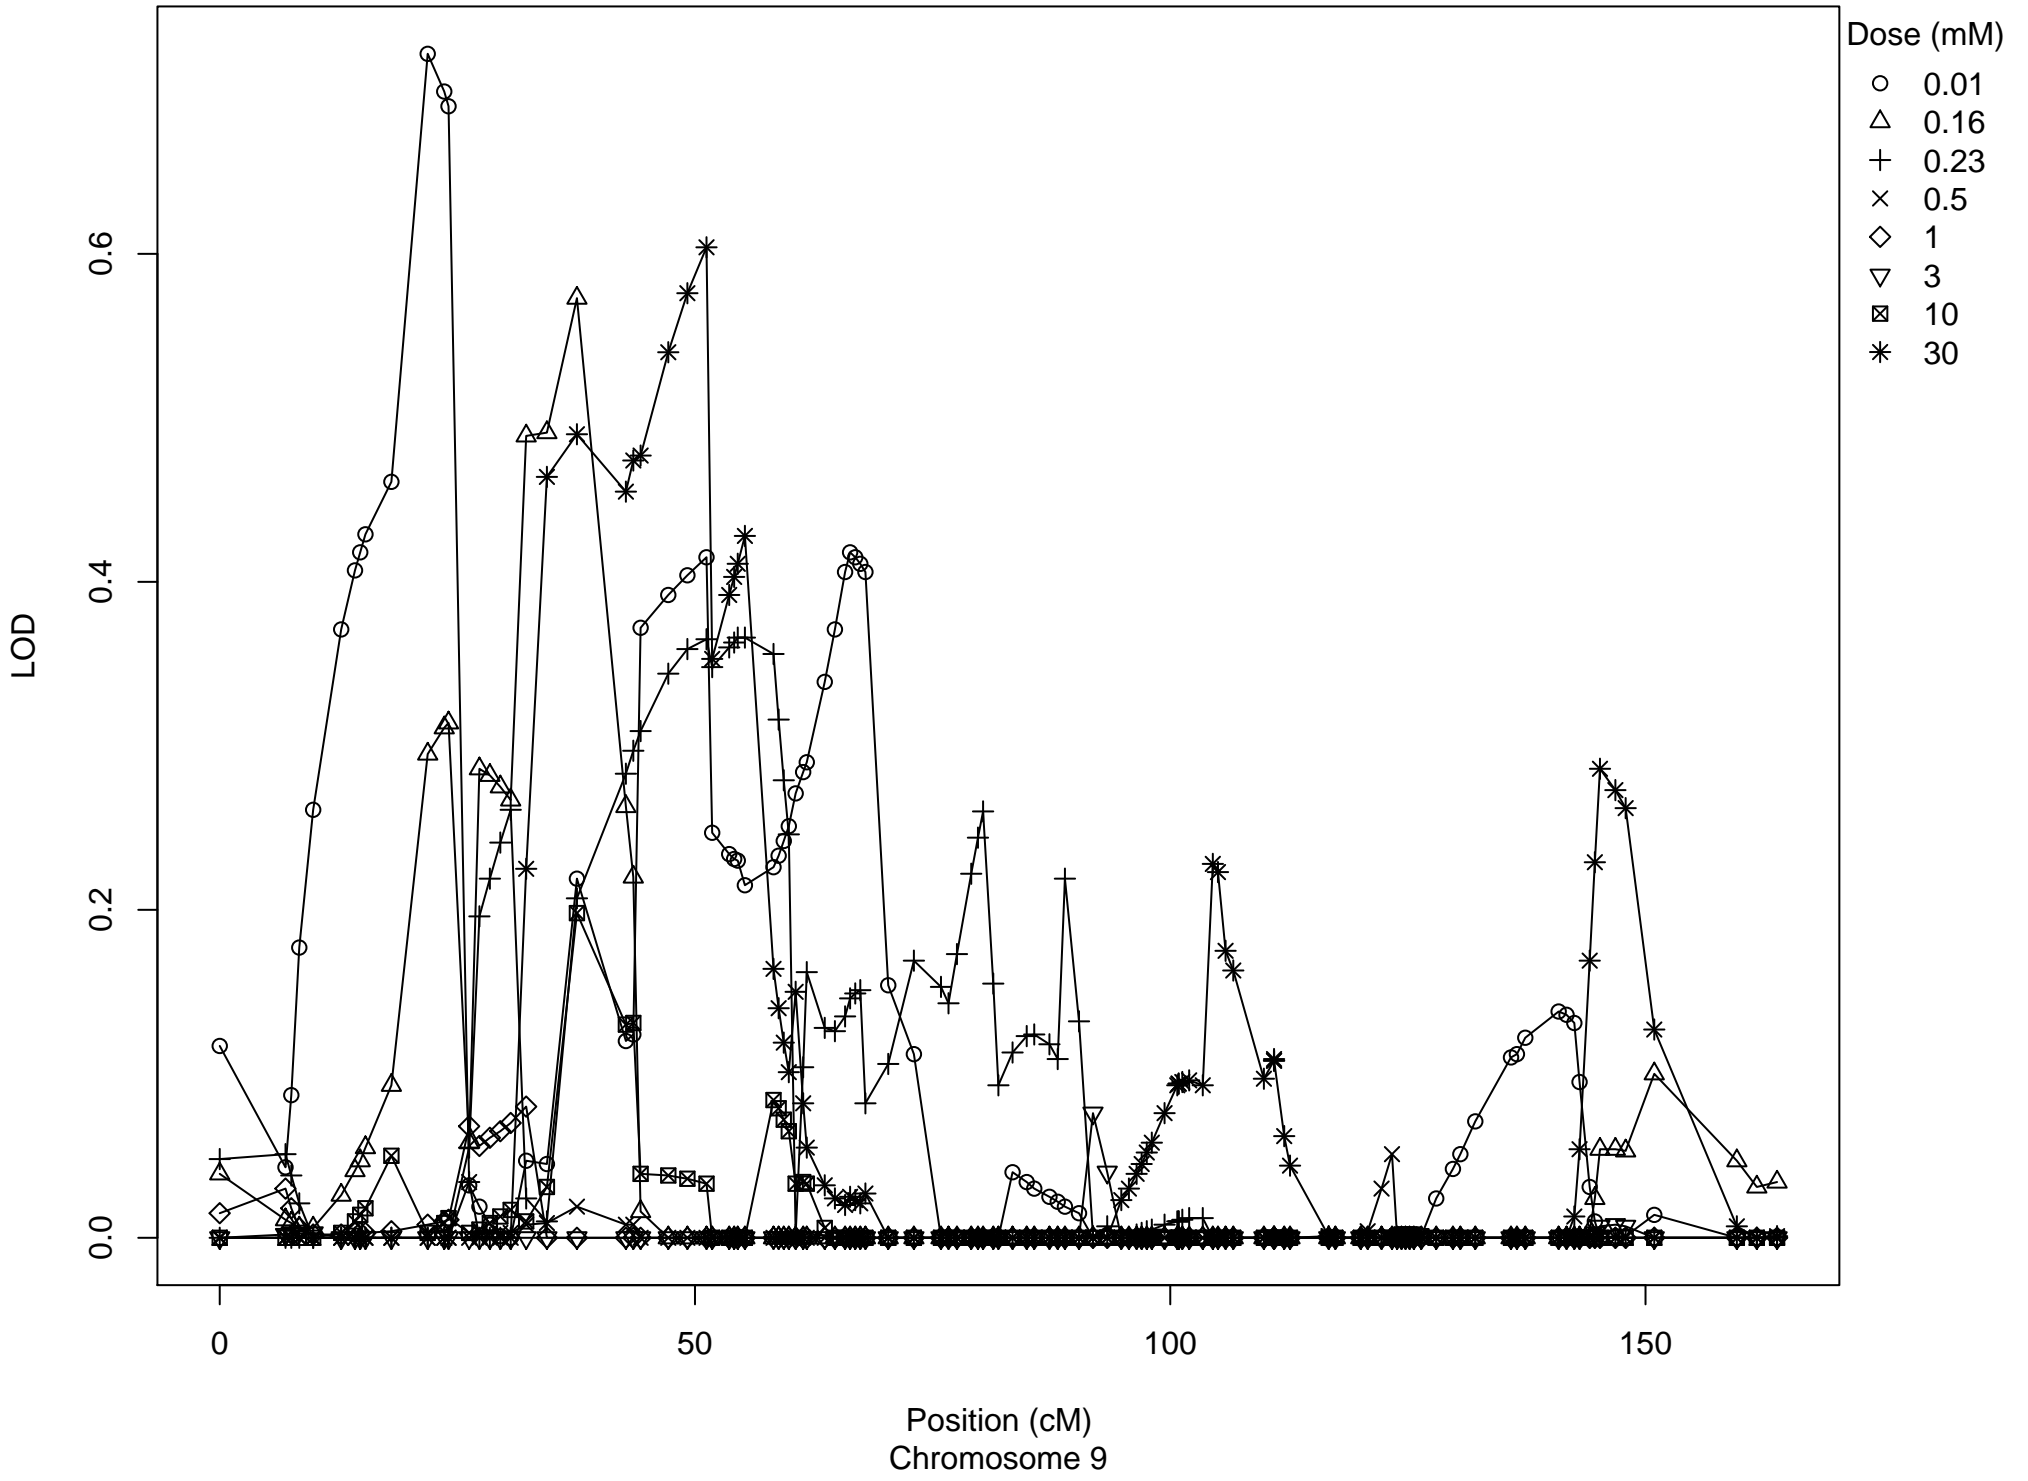

# 85A1 (85A1)

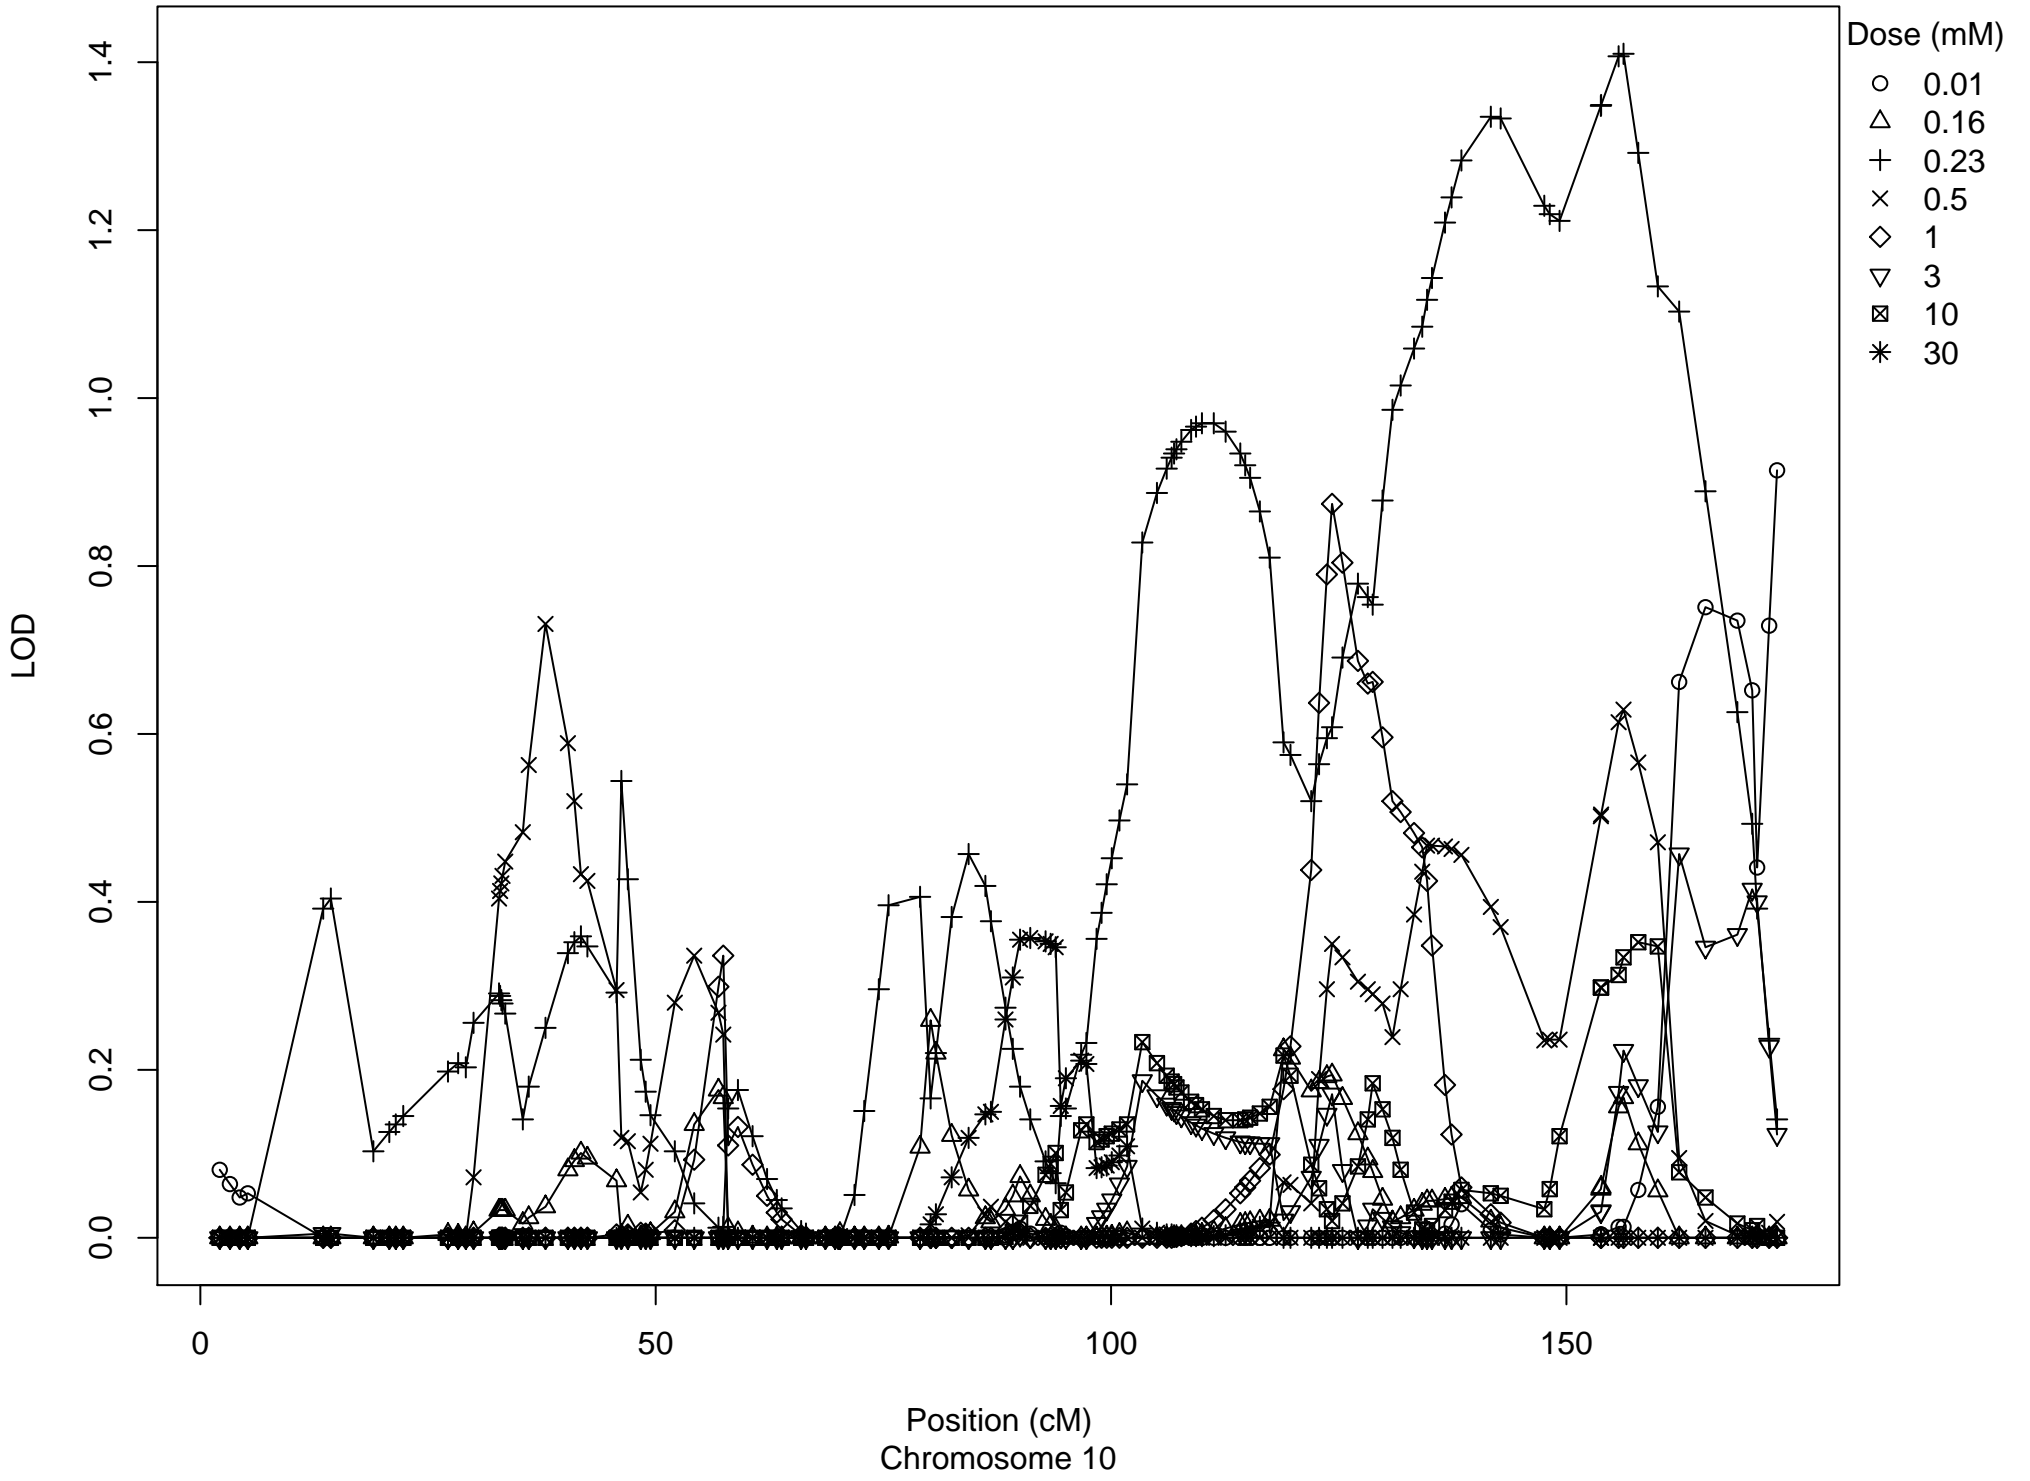

# 85A1 (85A1)

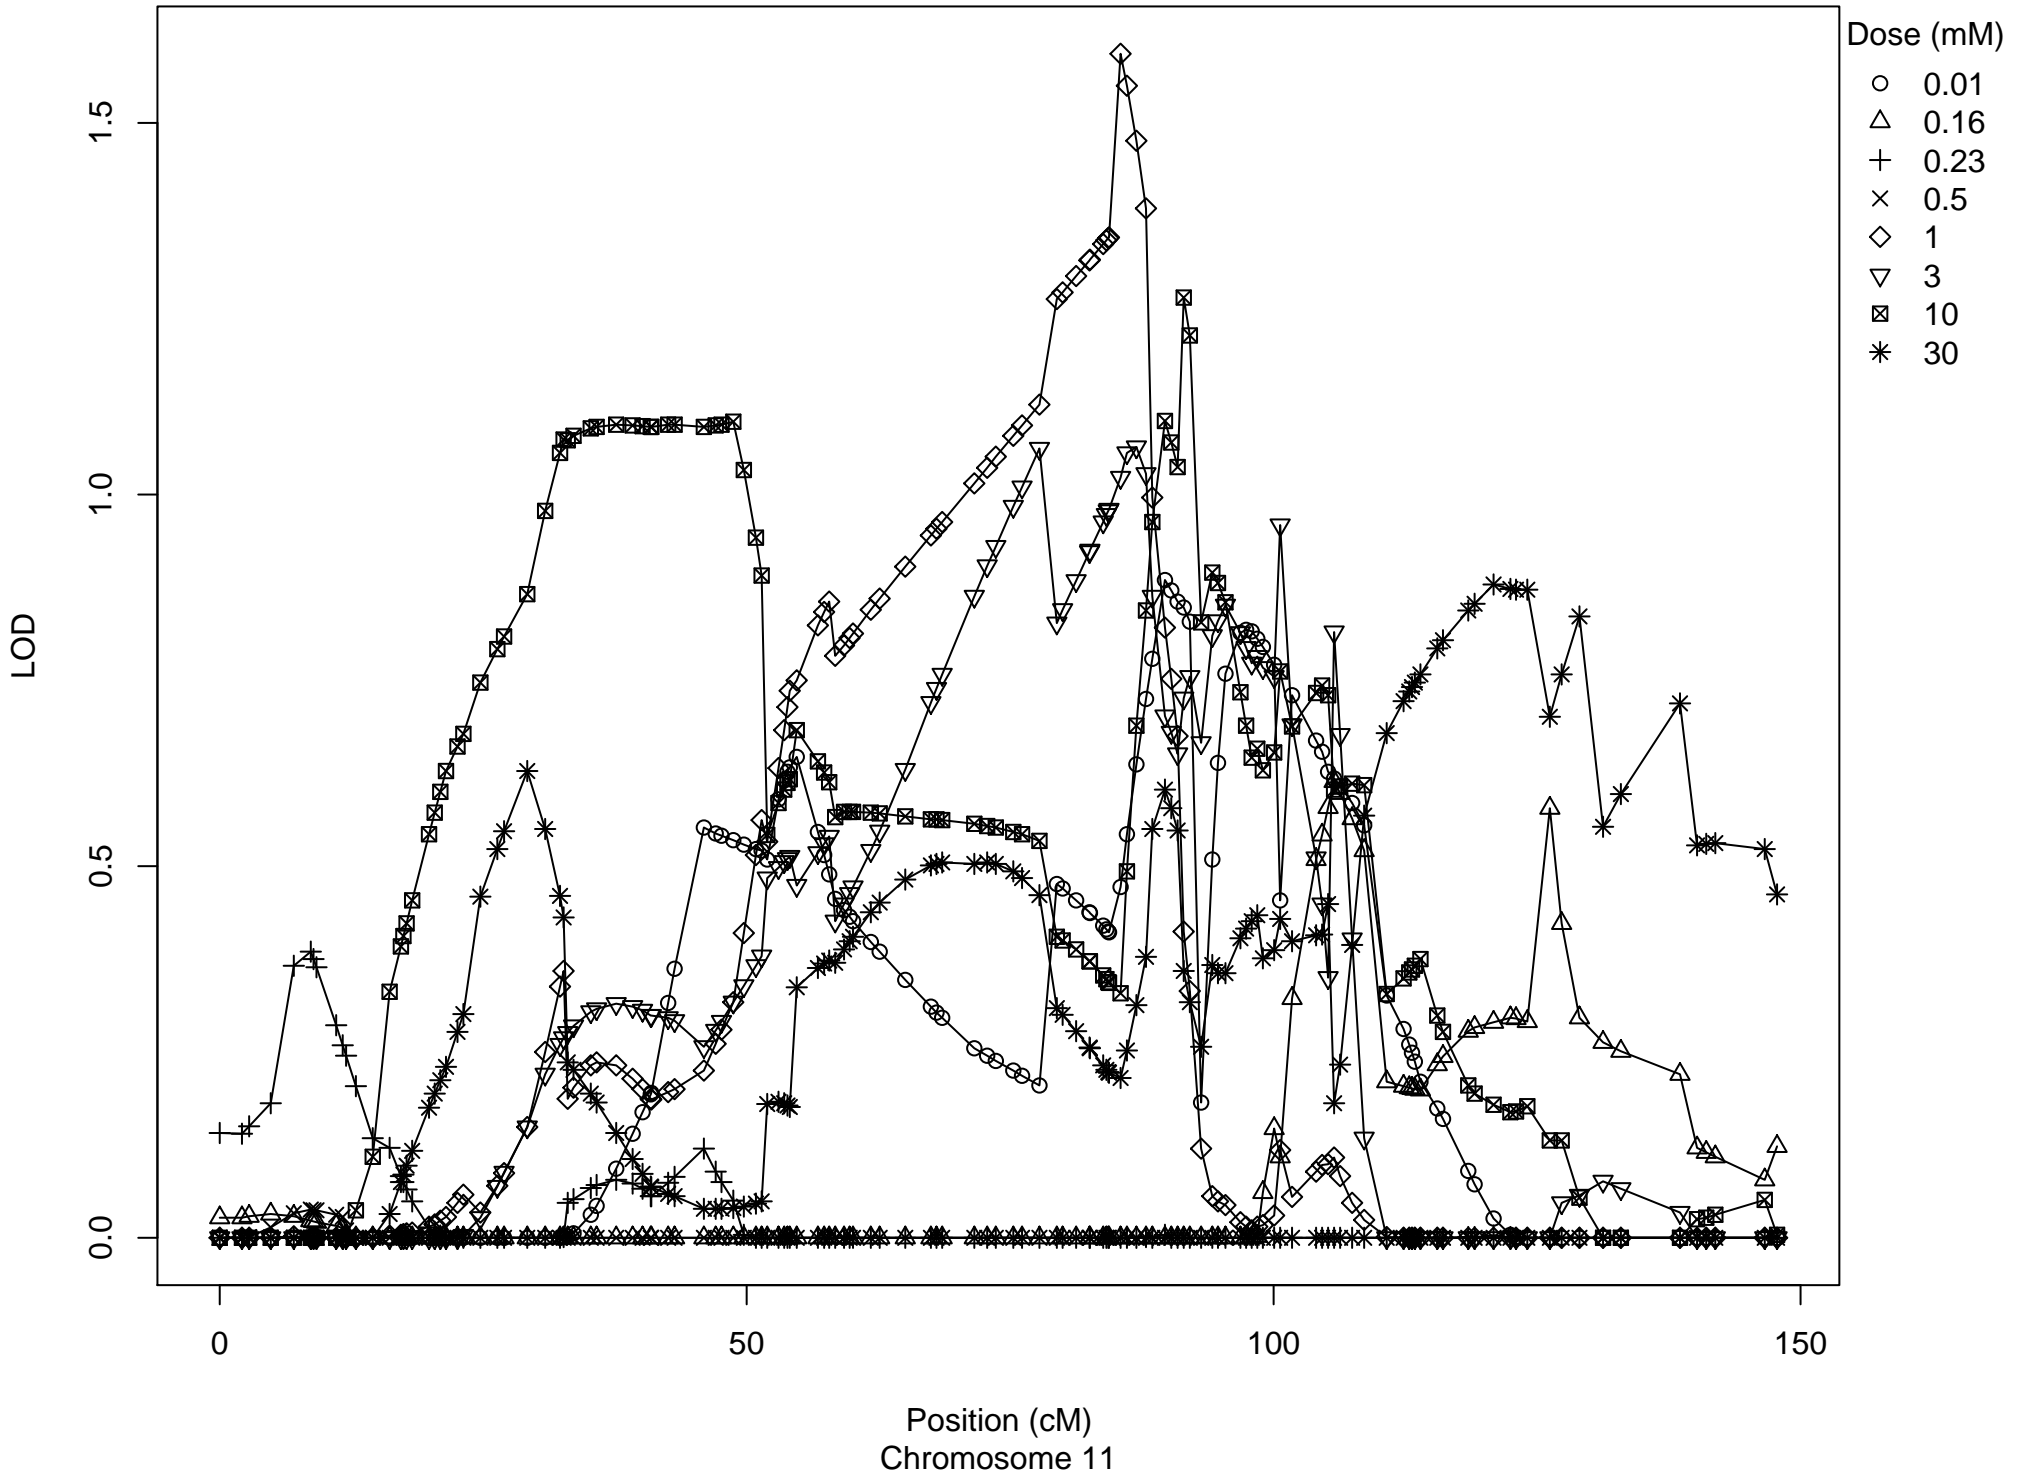

# 85A1 (85A1)

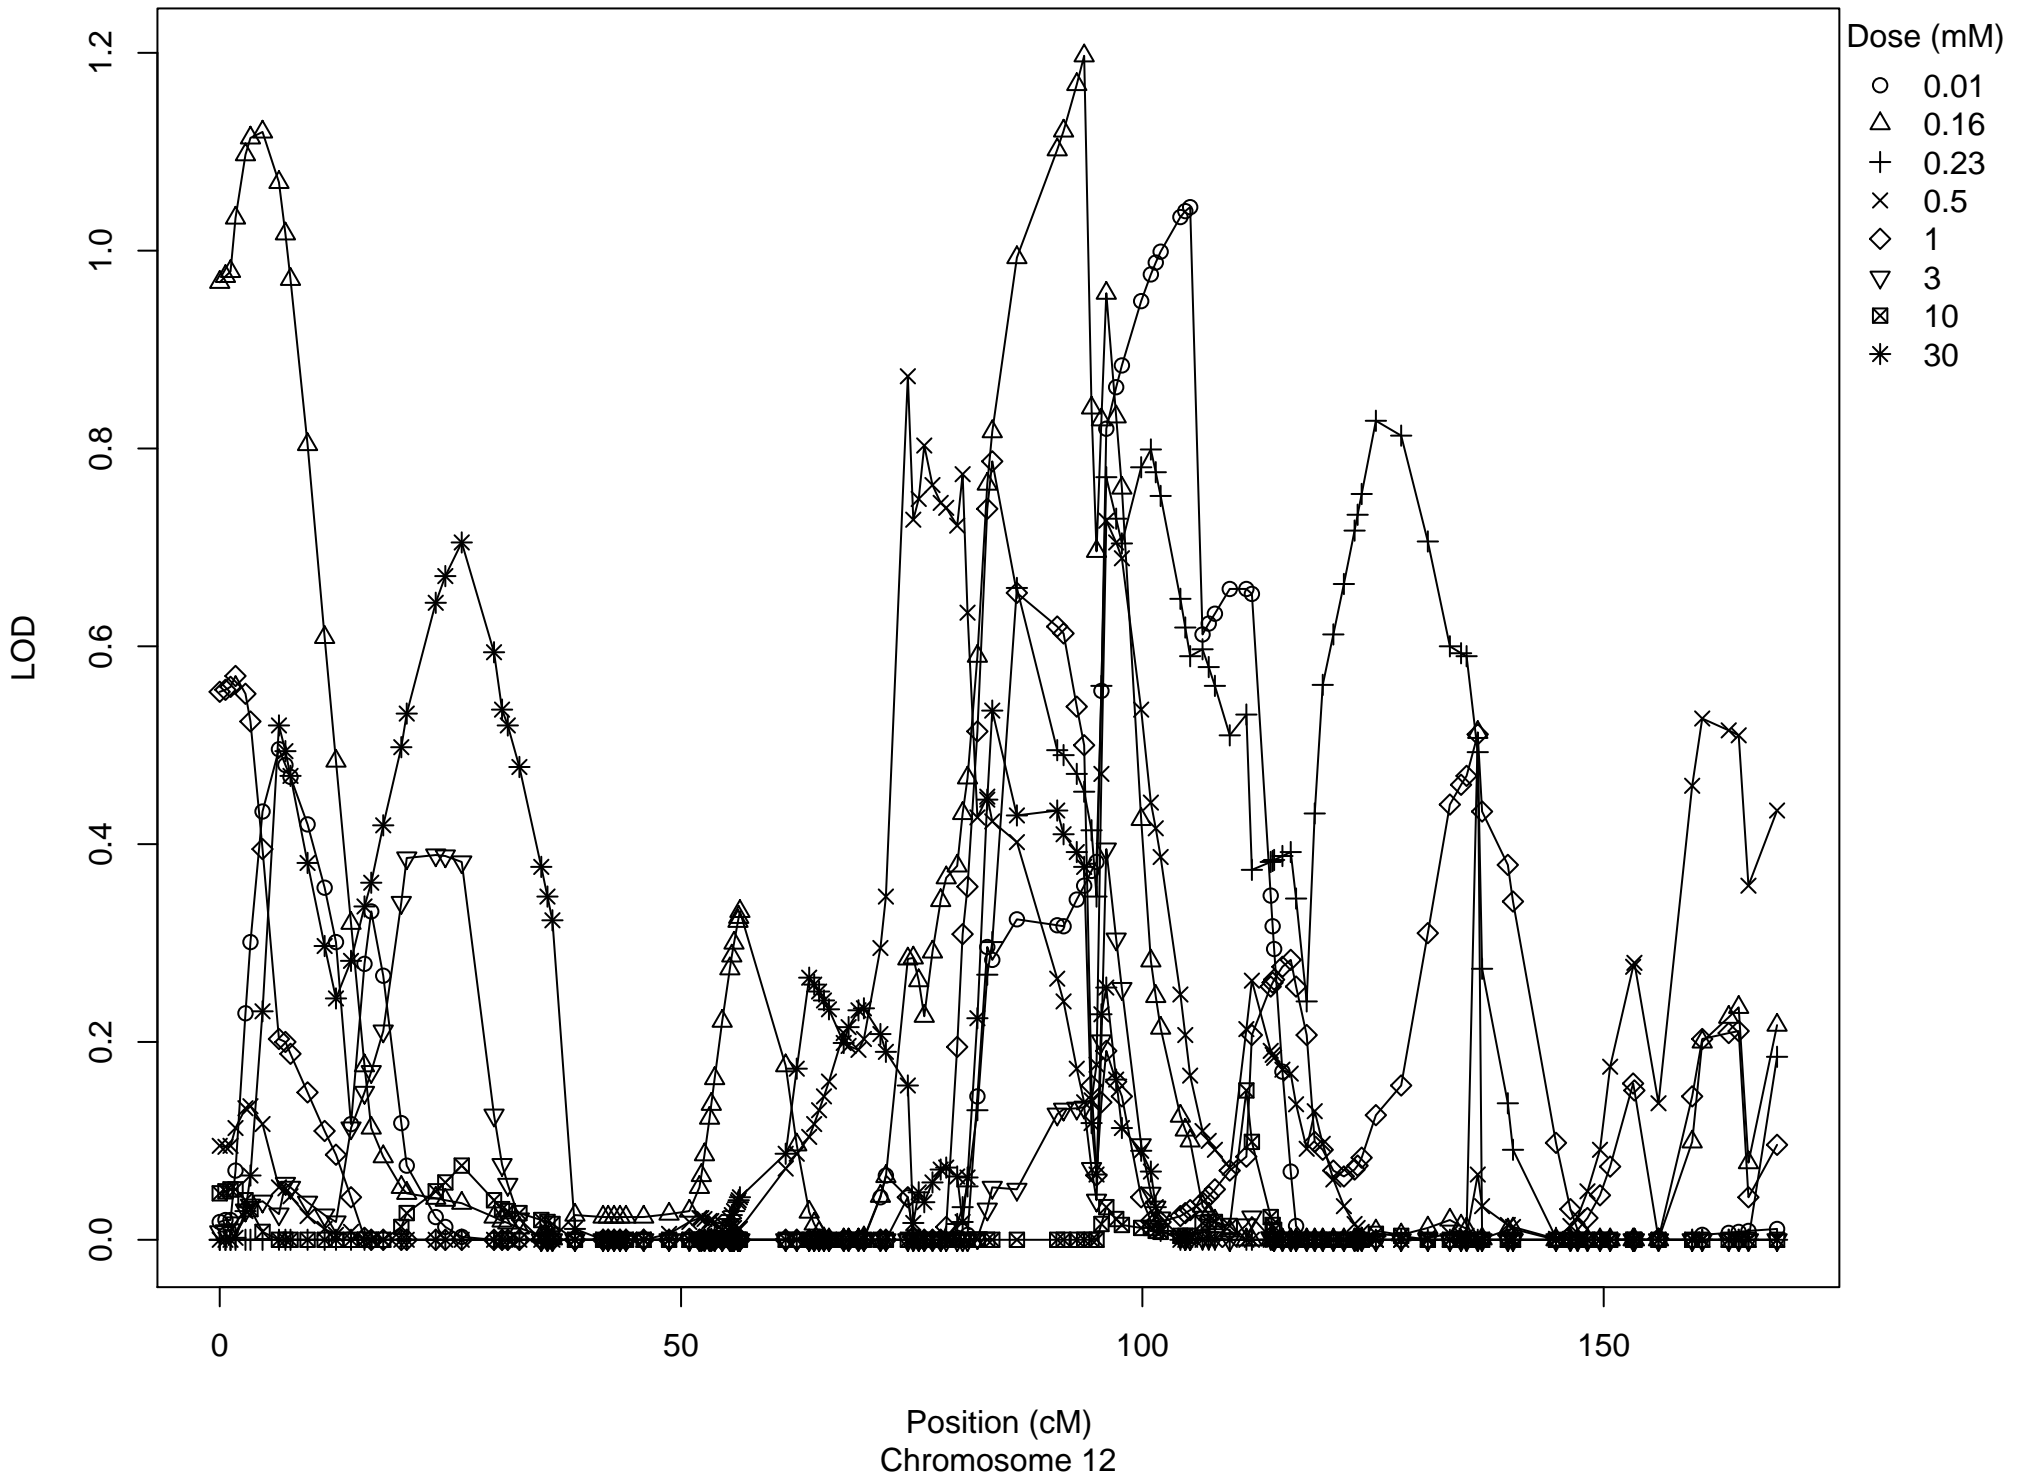



# 85A1 (85A1)

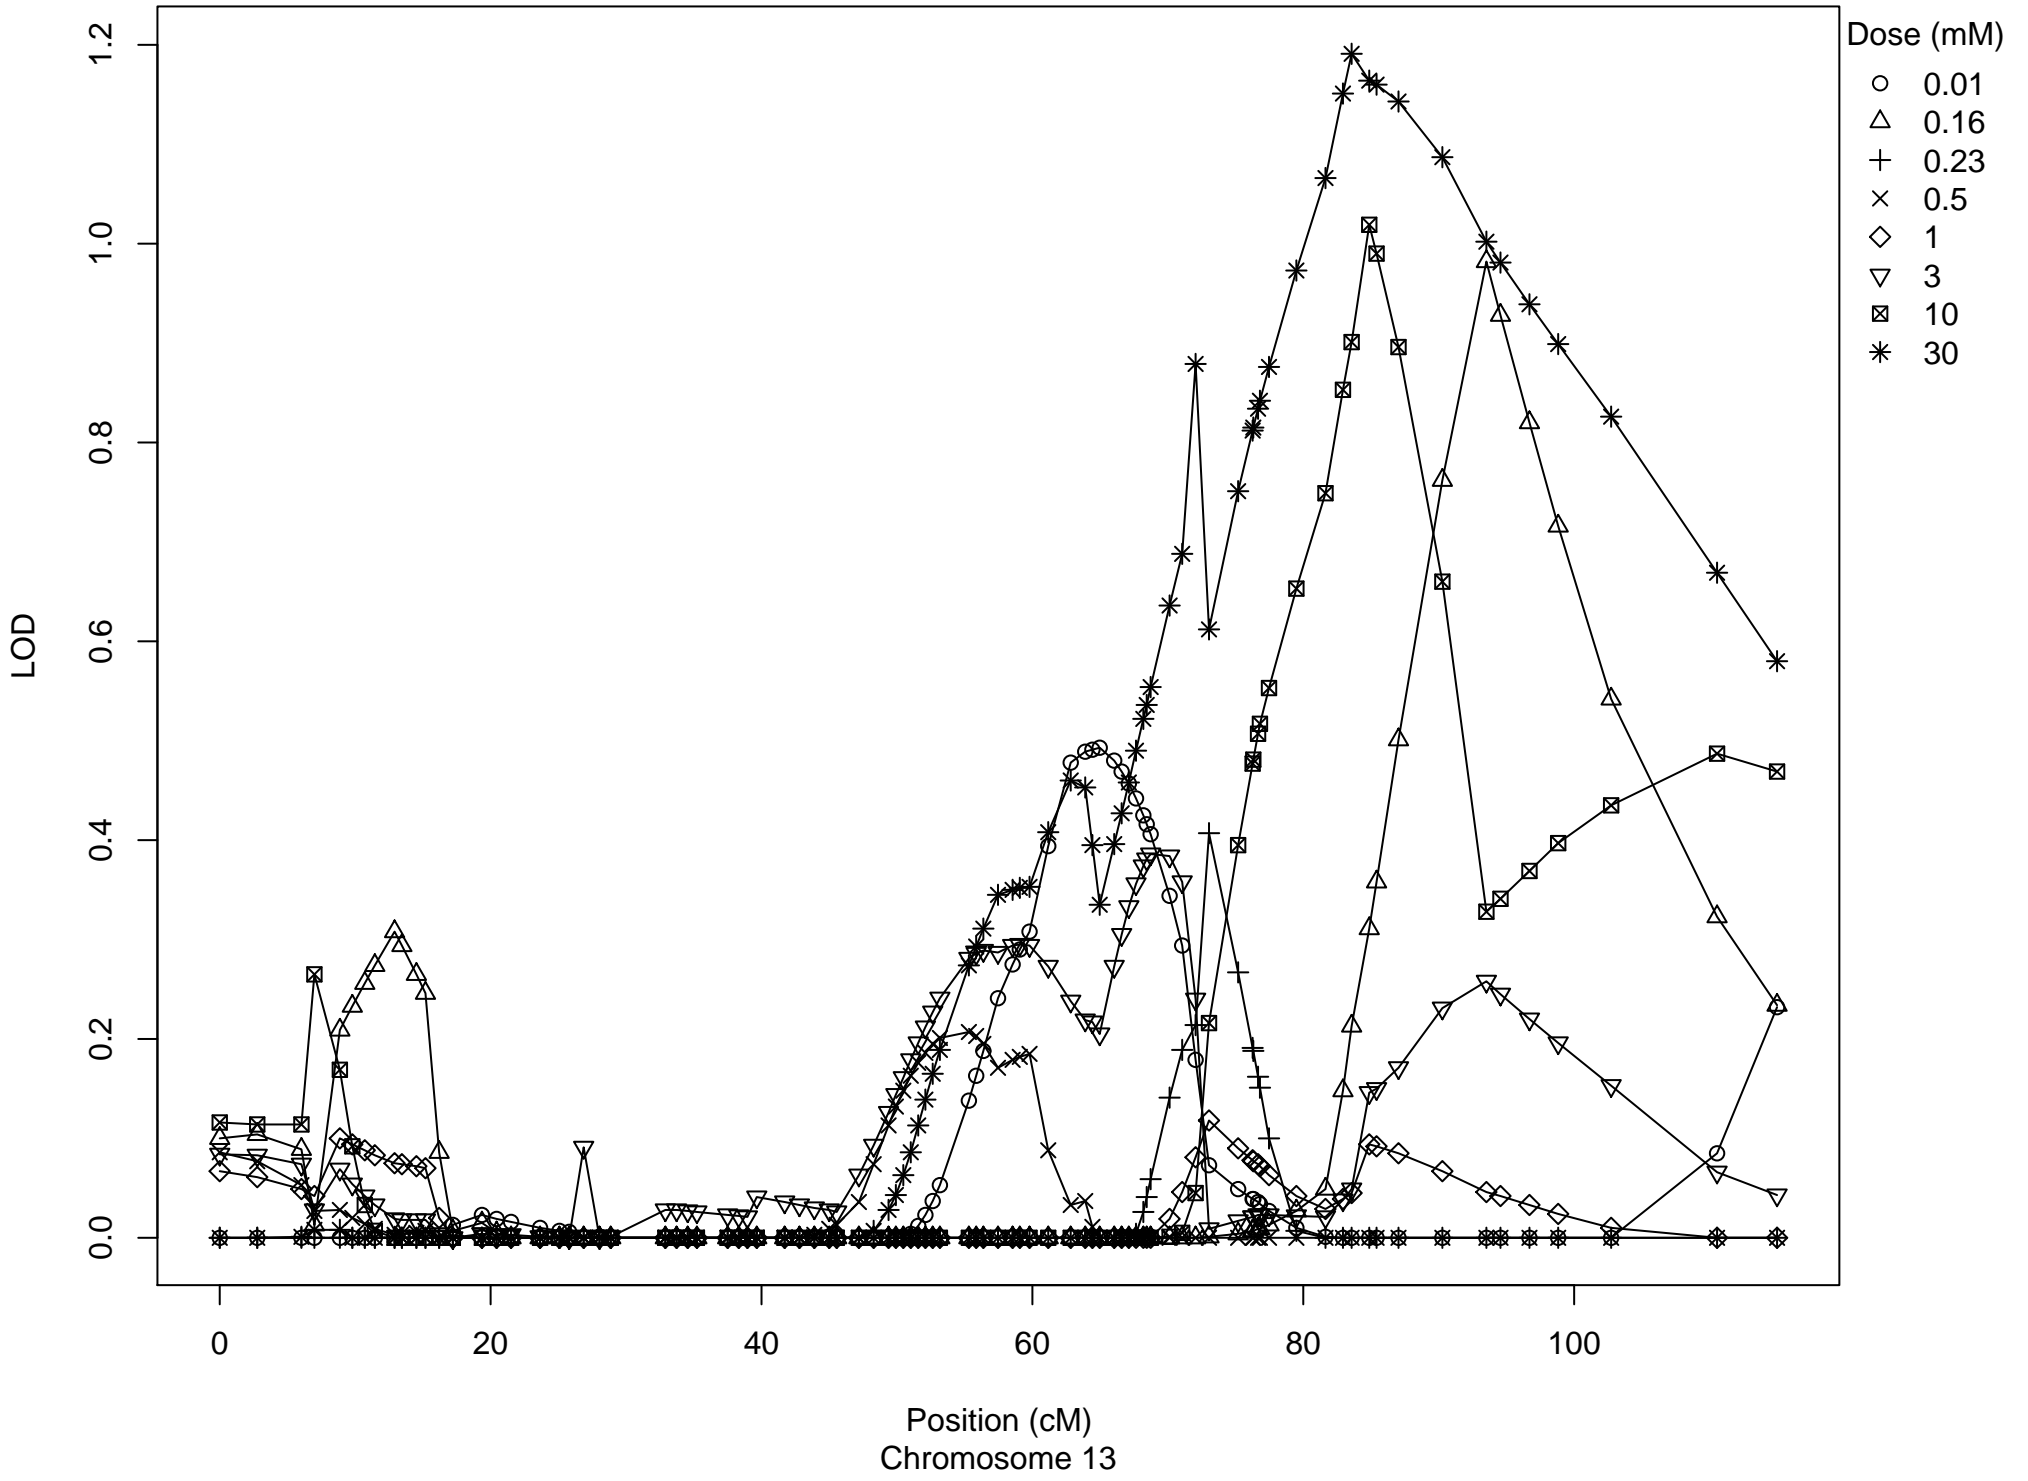

# 85A1 (85A1)

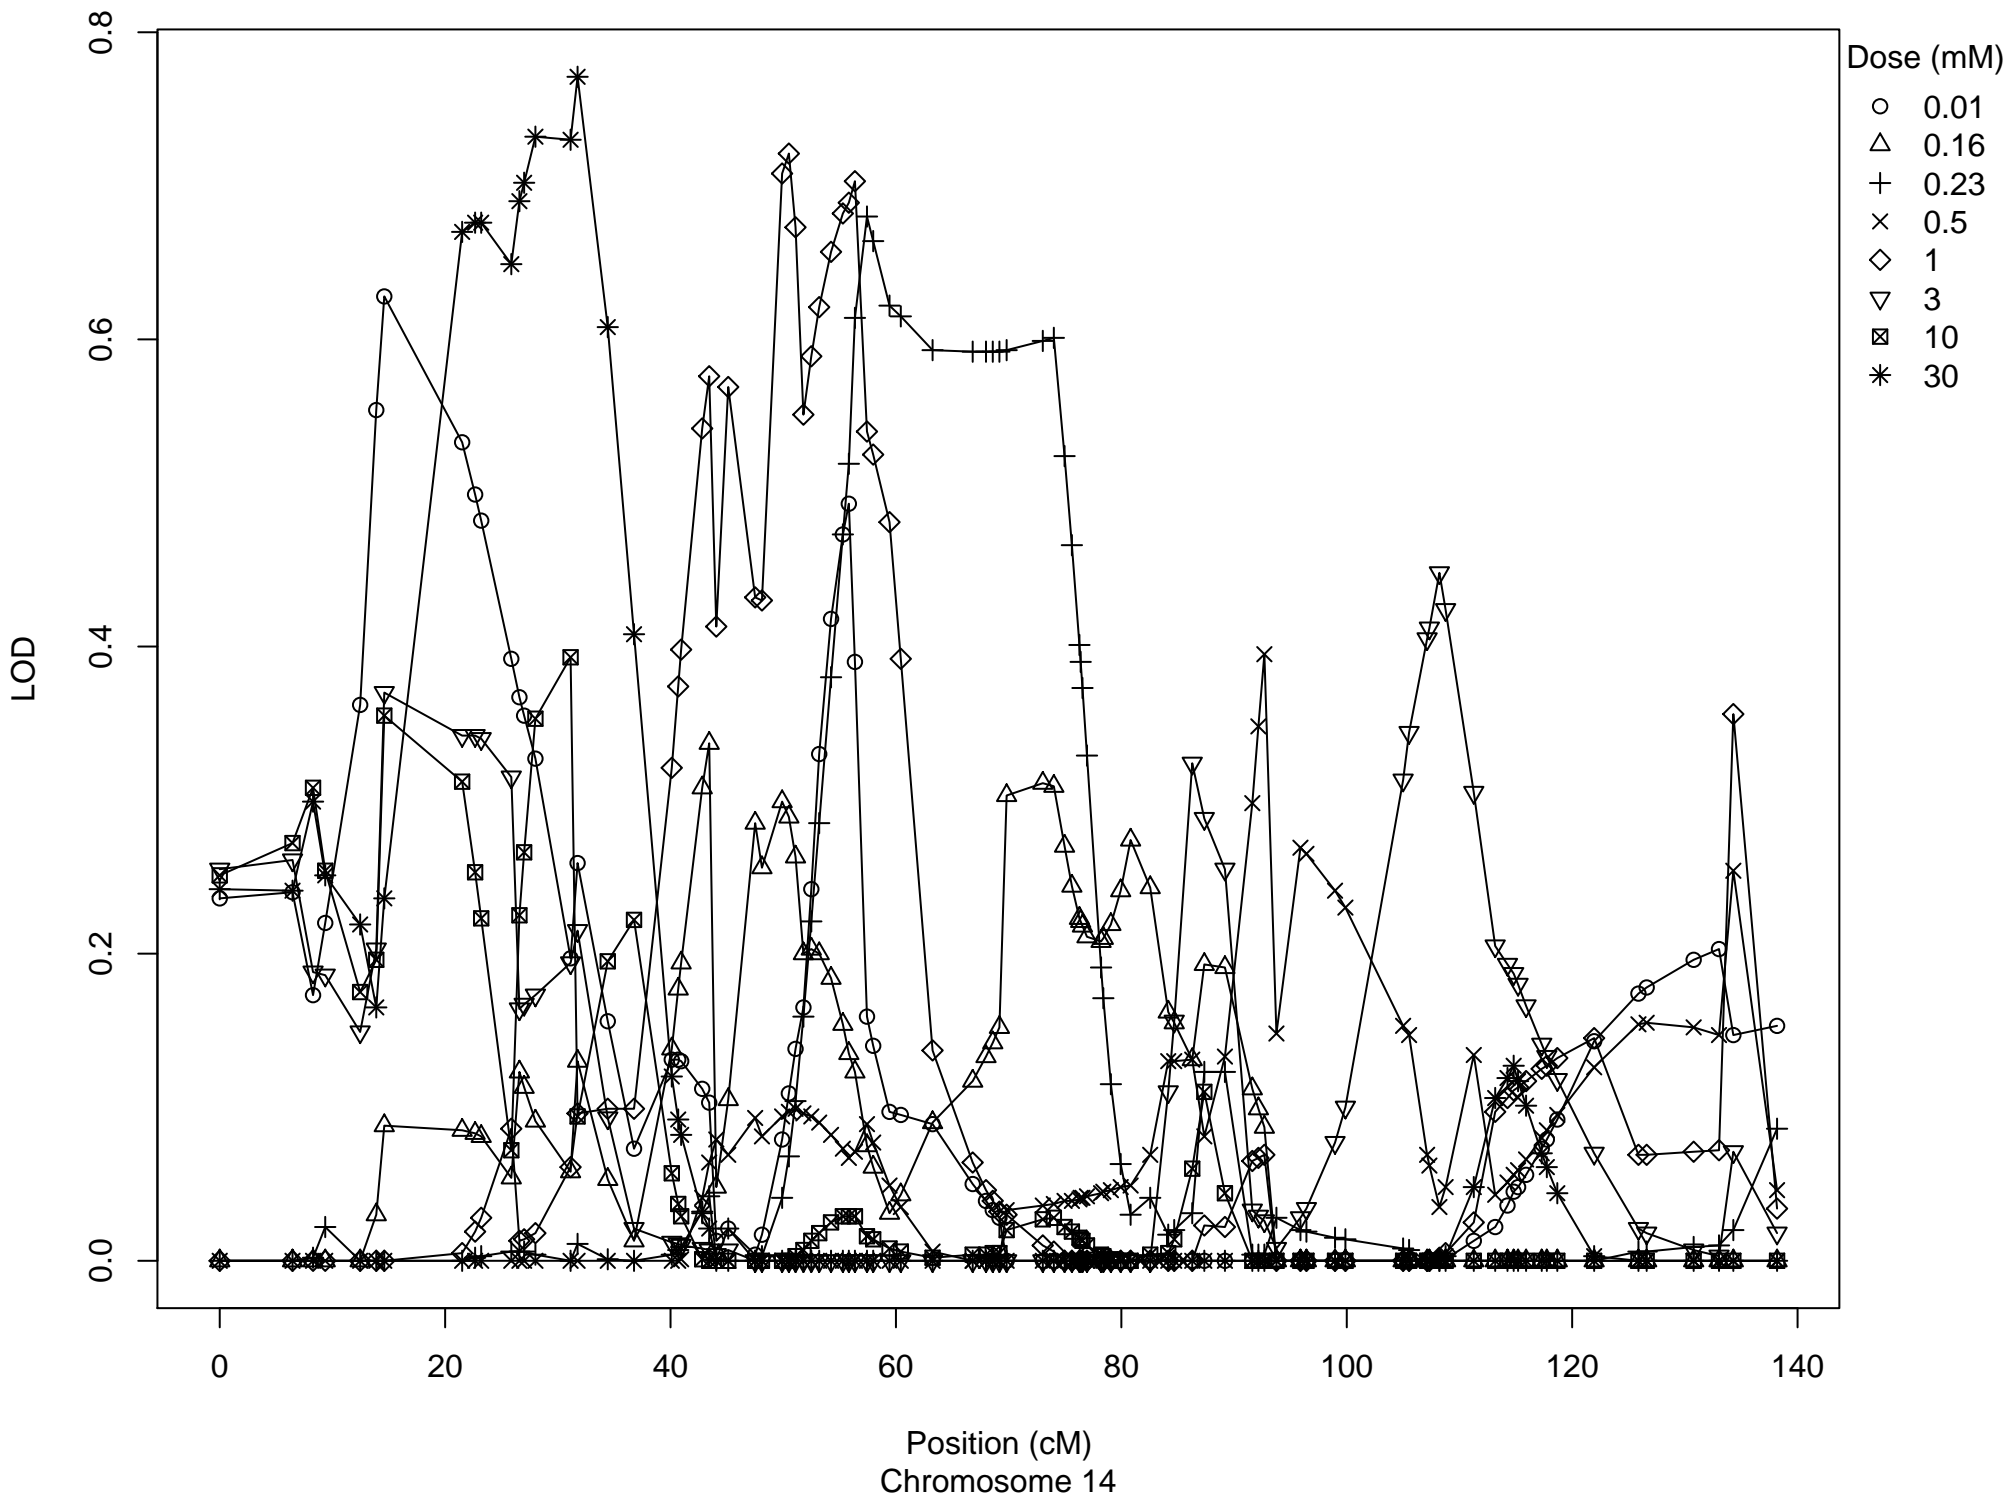

# 85A1 (85A1)

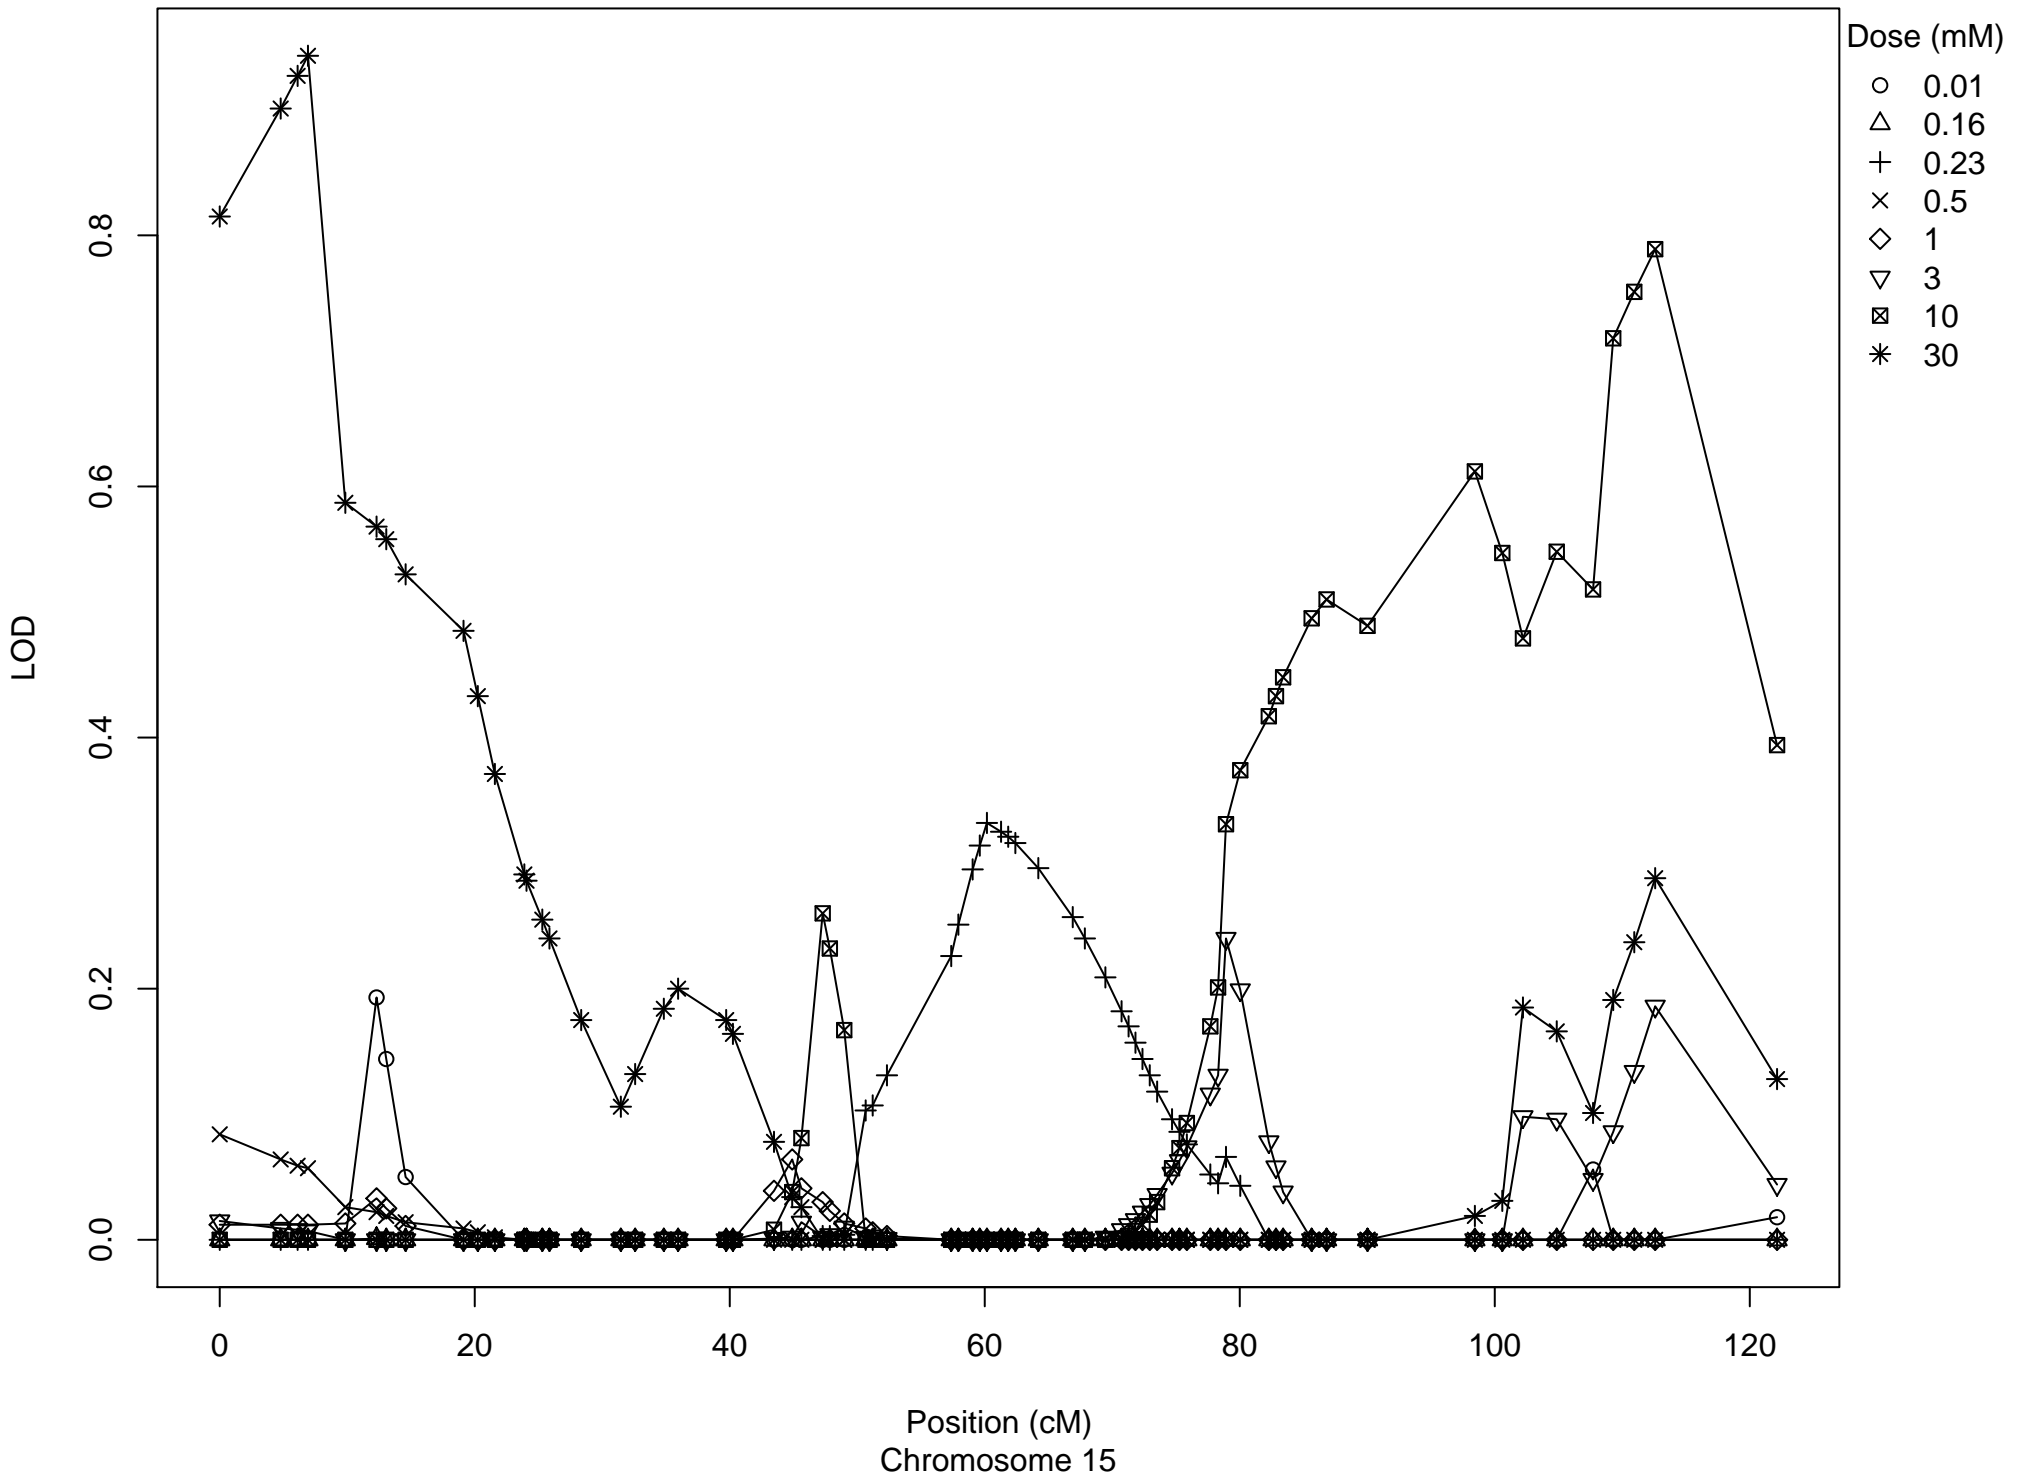

# 85A1 (85A1)

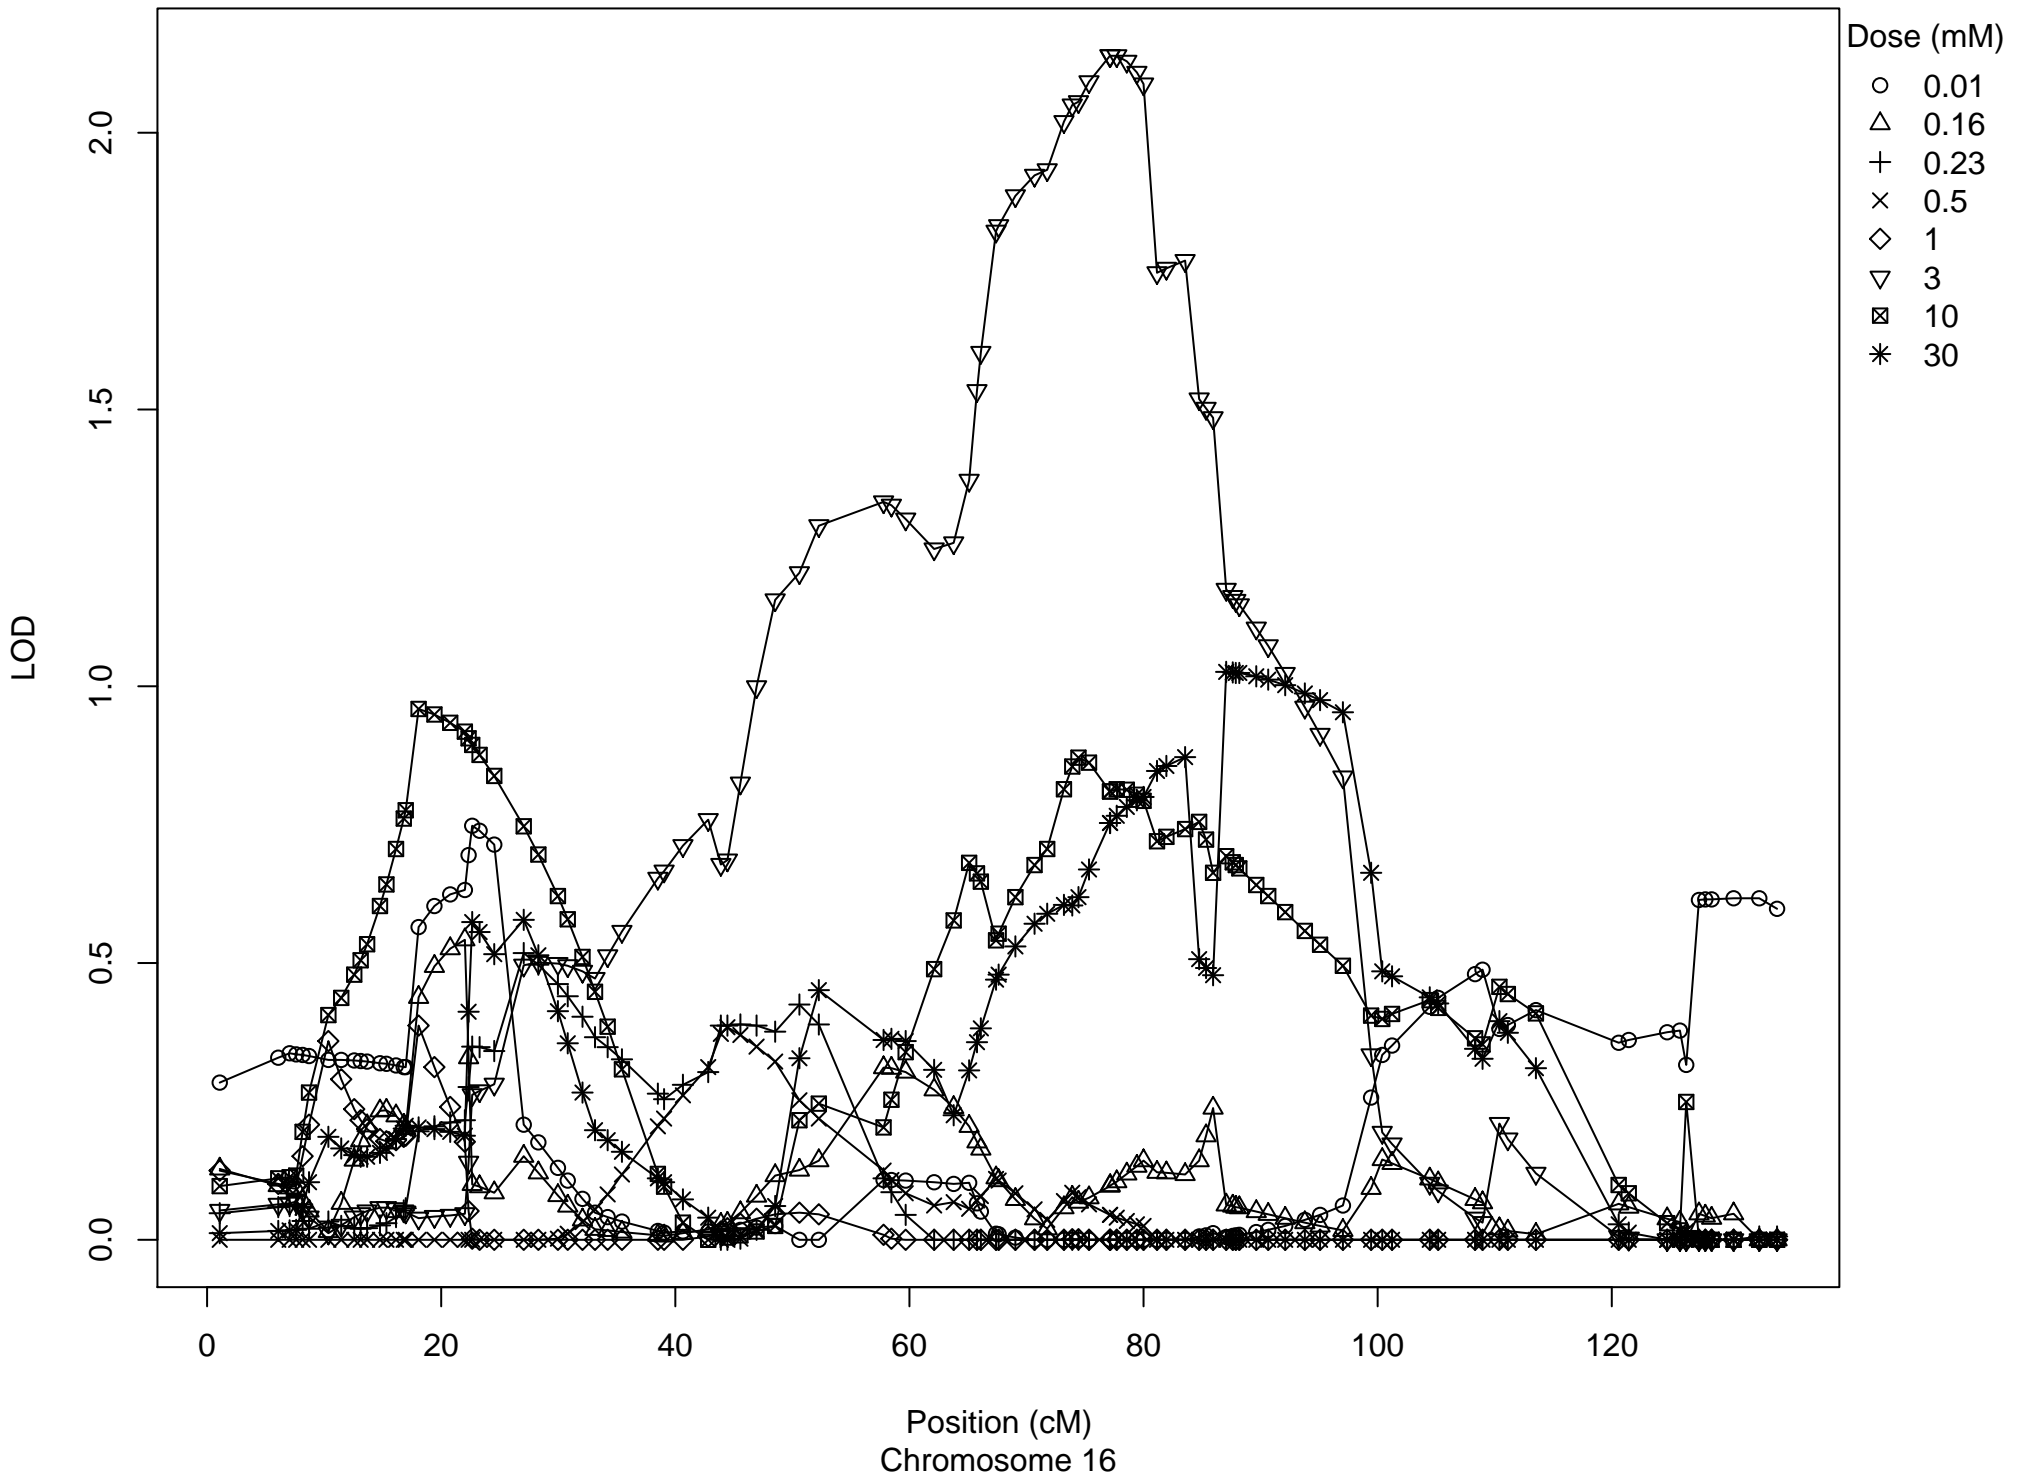



# 85A1 (85A1)

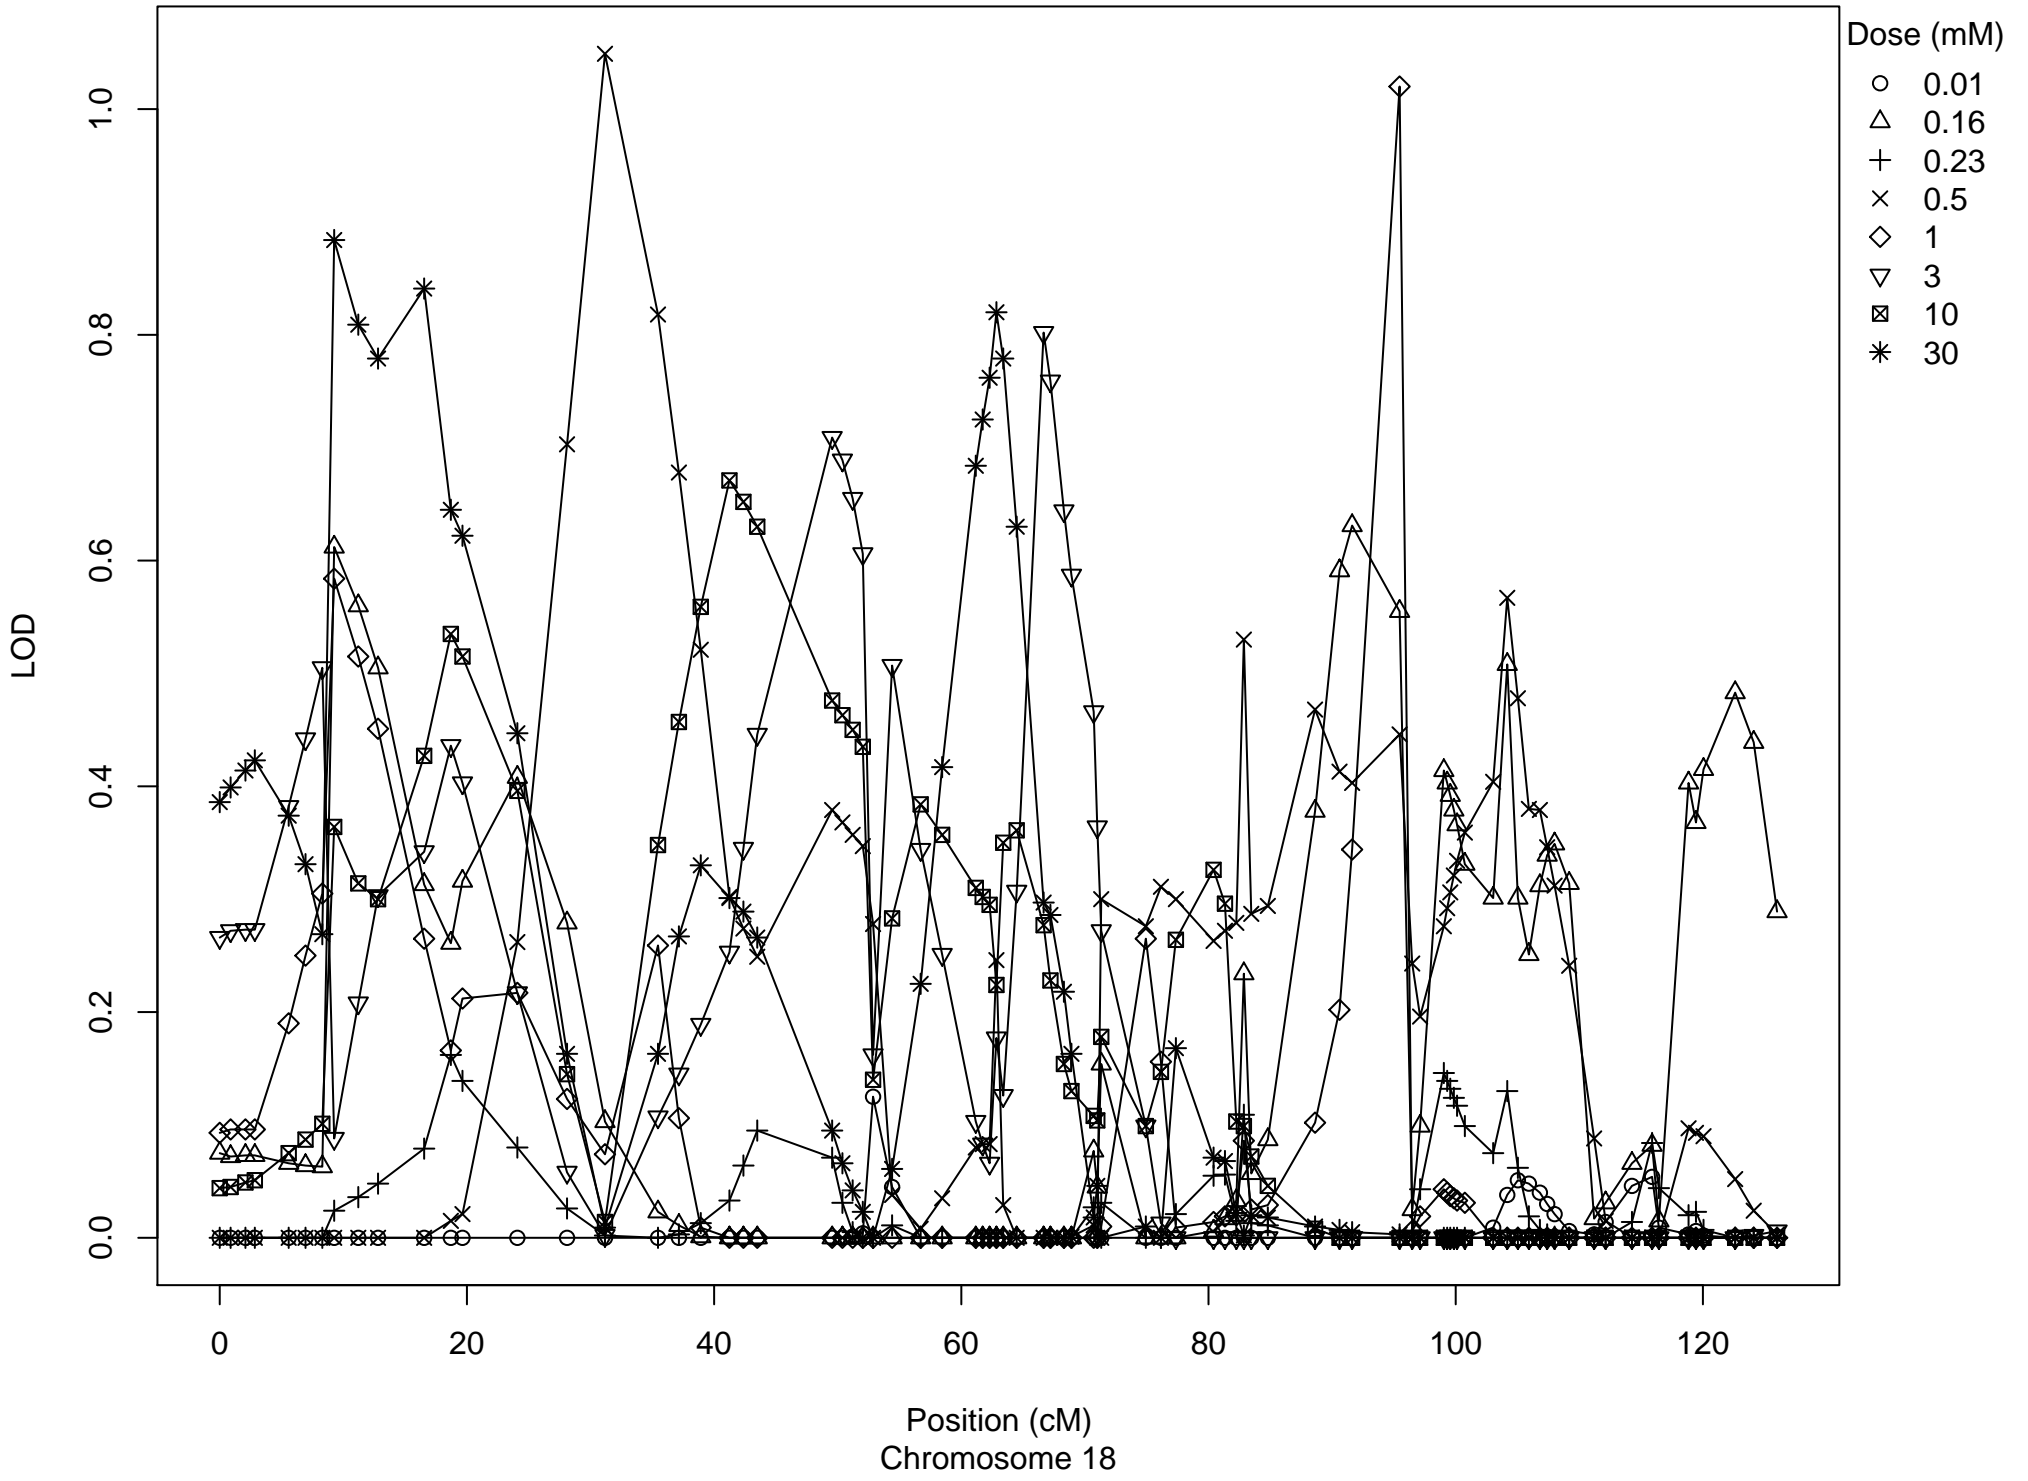

# 85A1 (85A1)

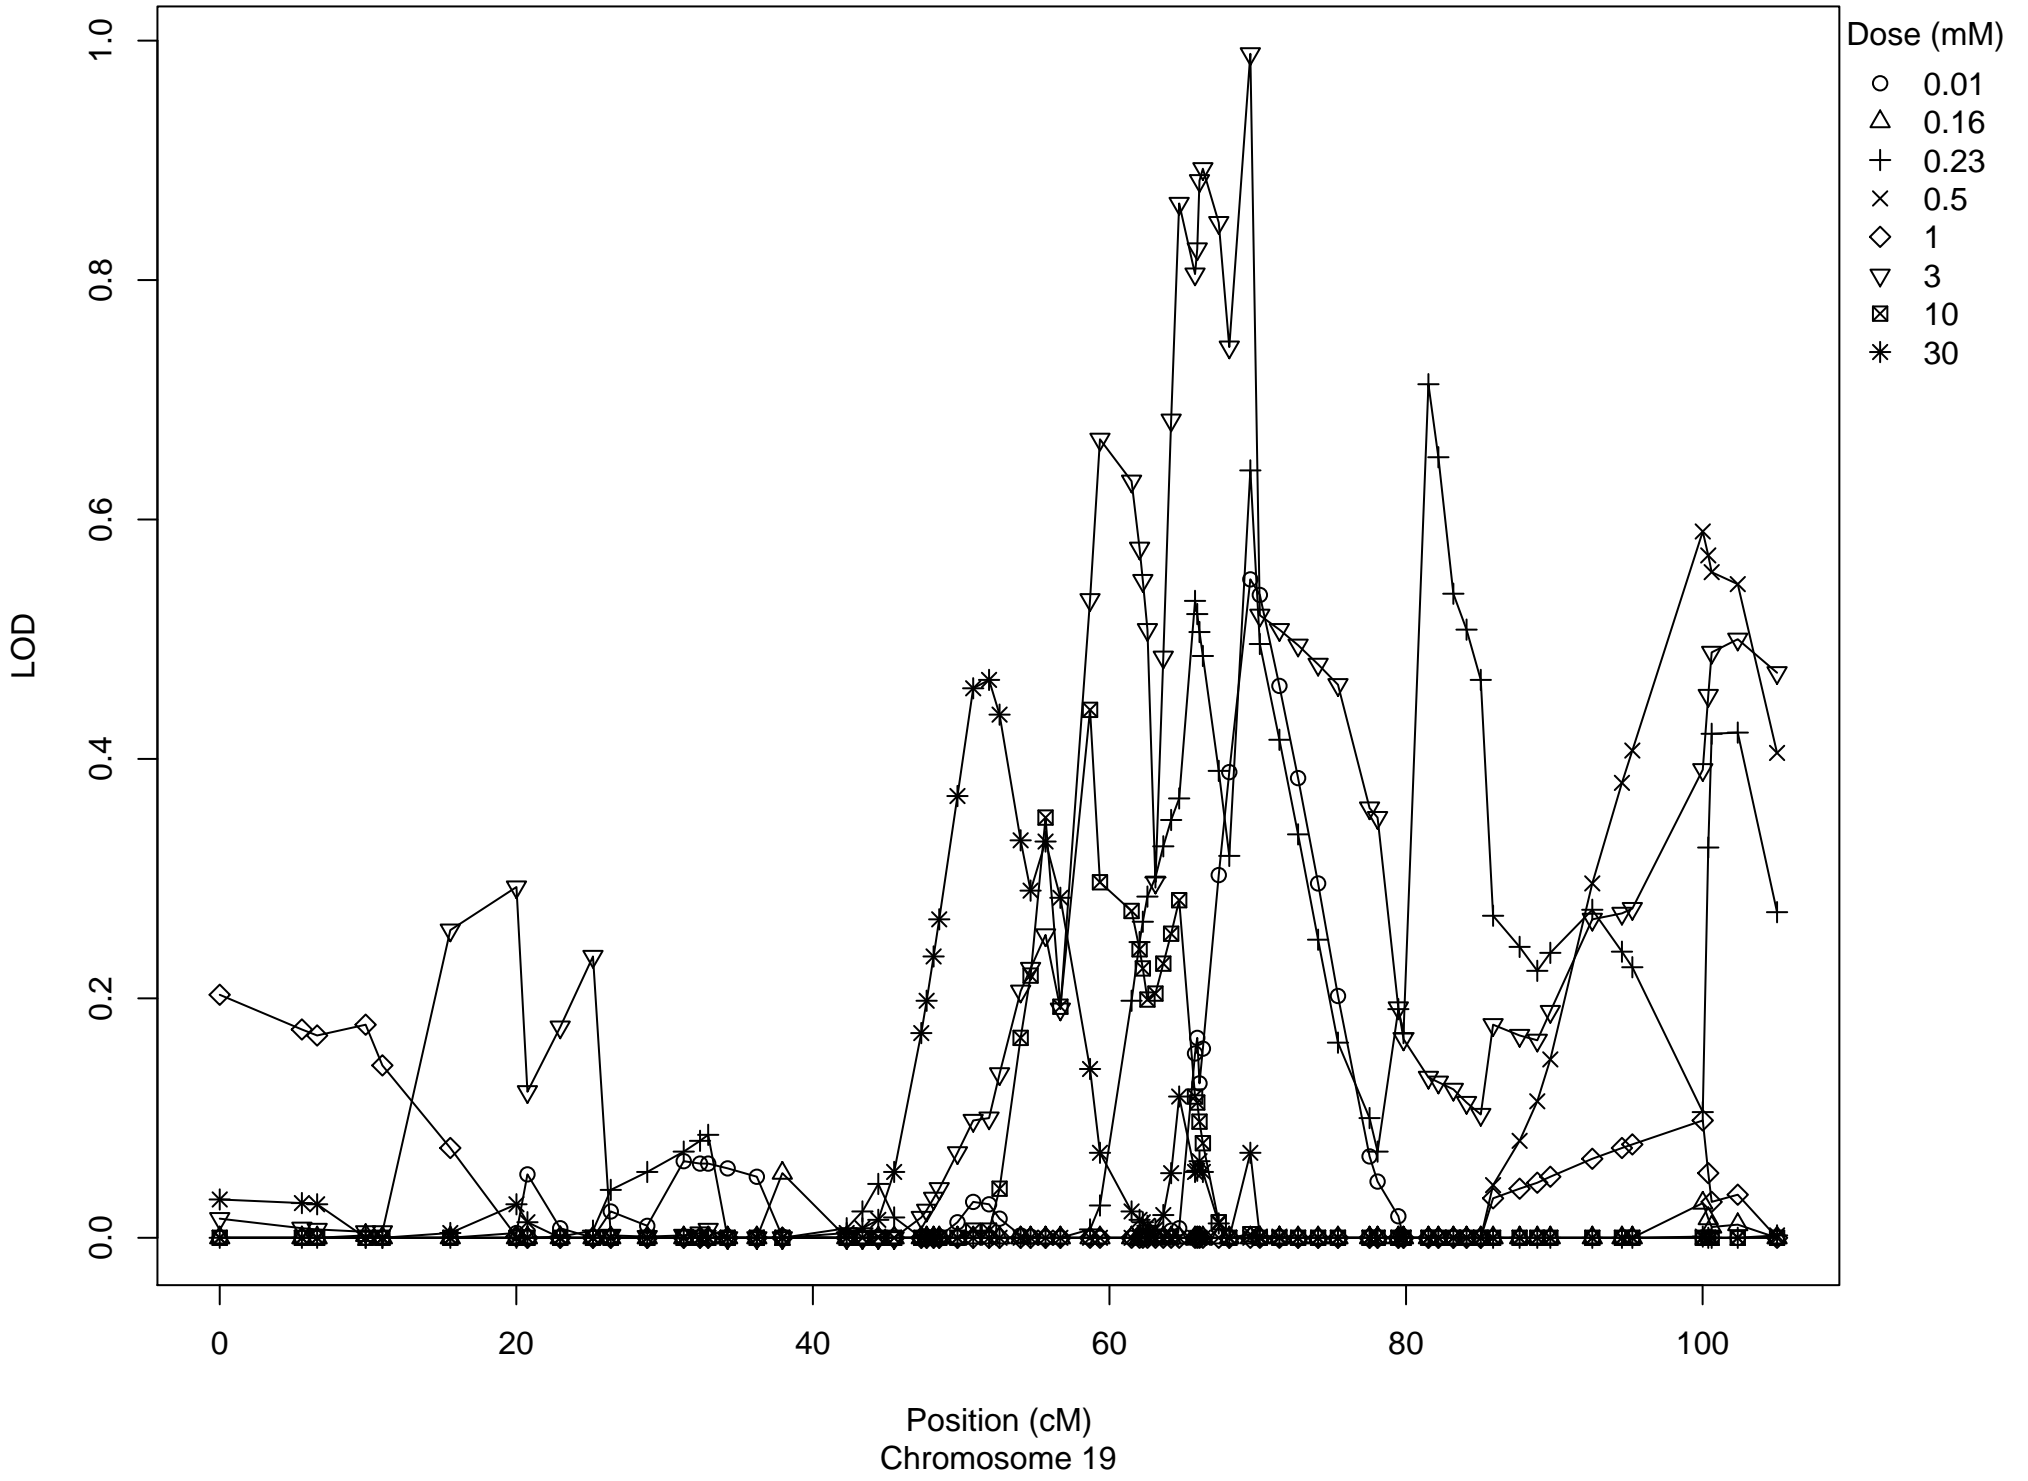

# 85A1 (85A1)

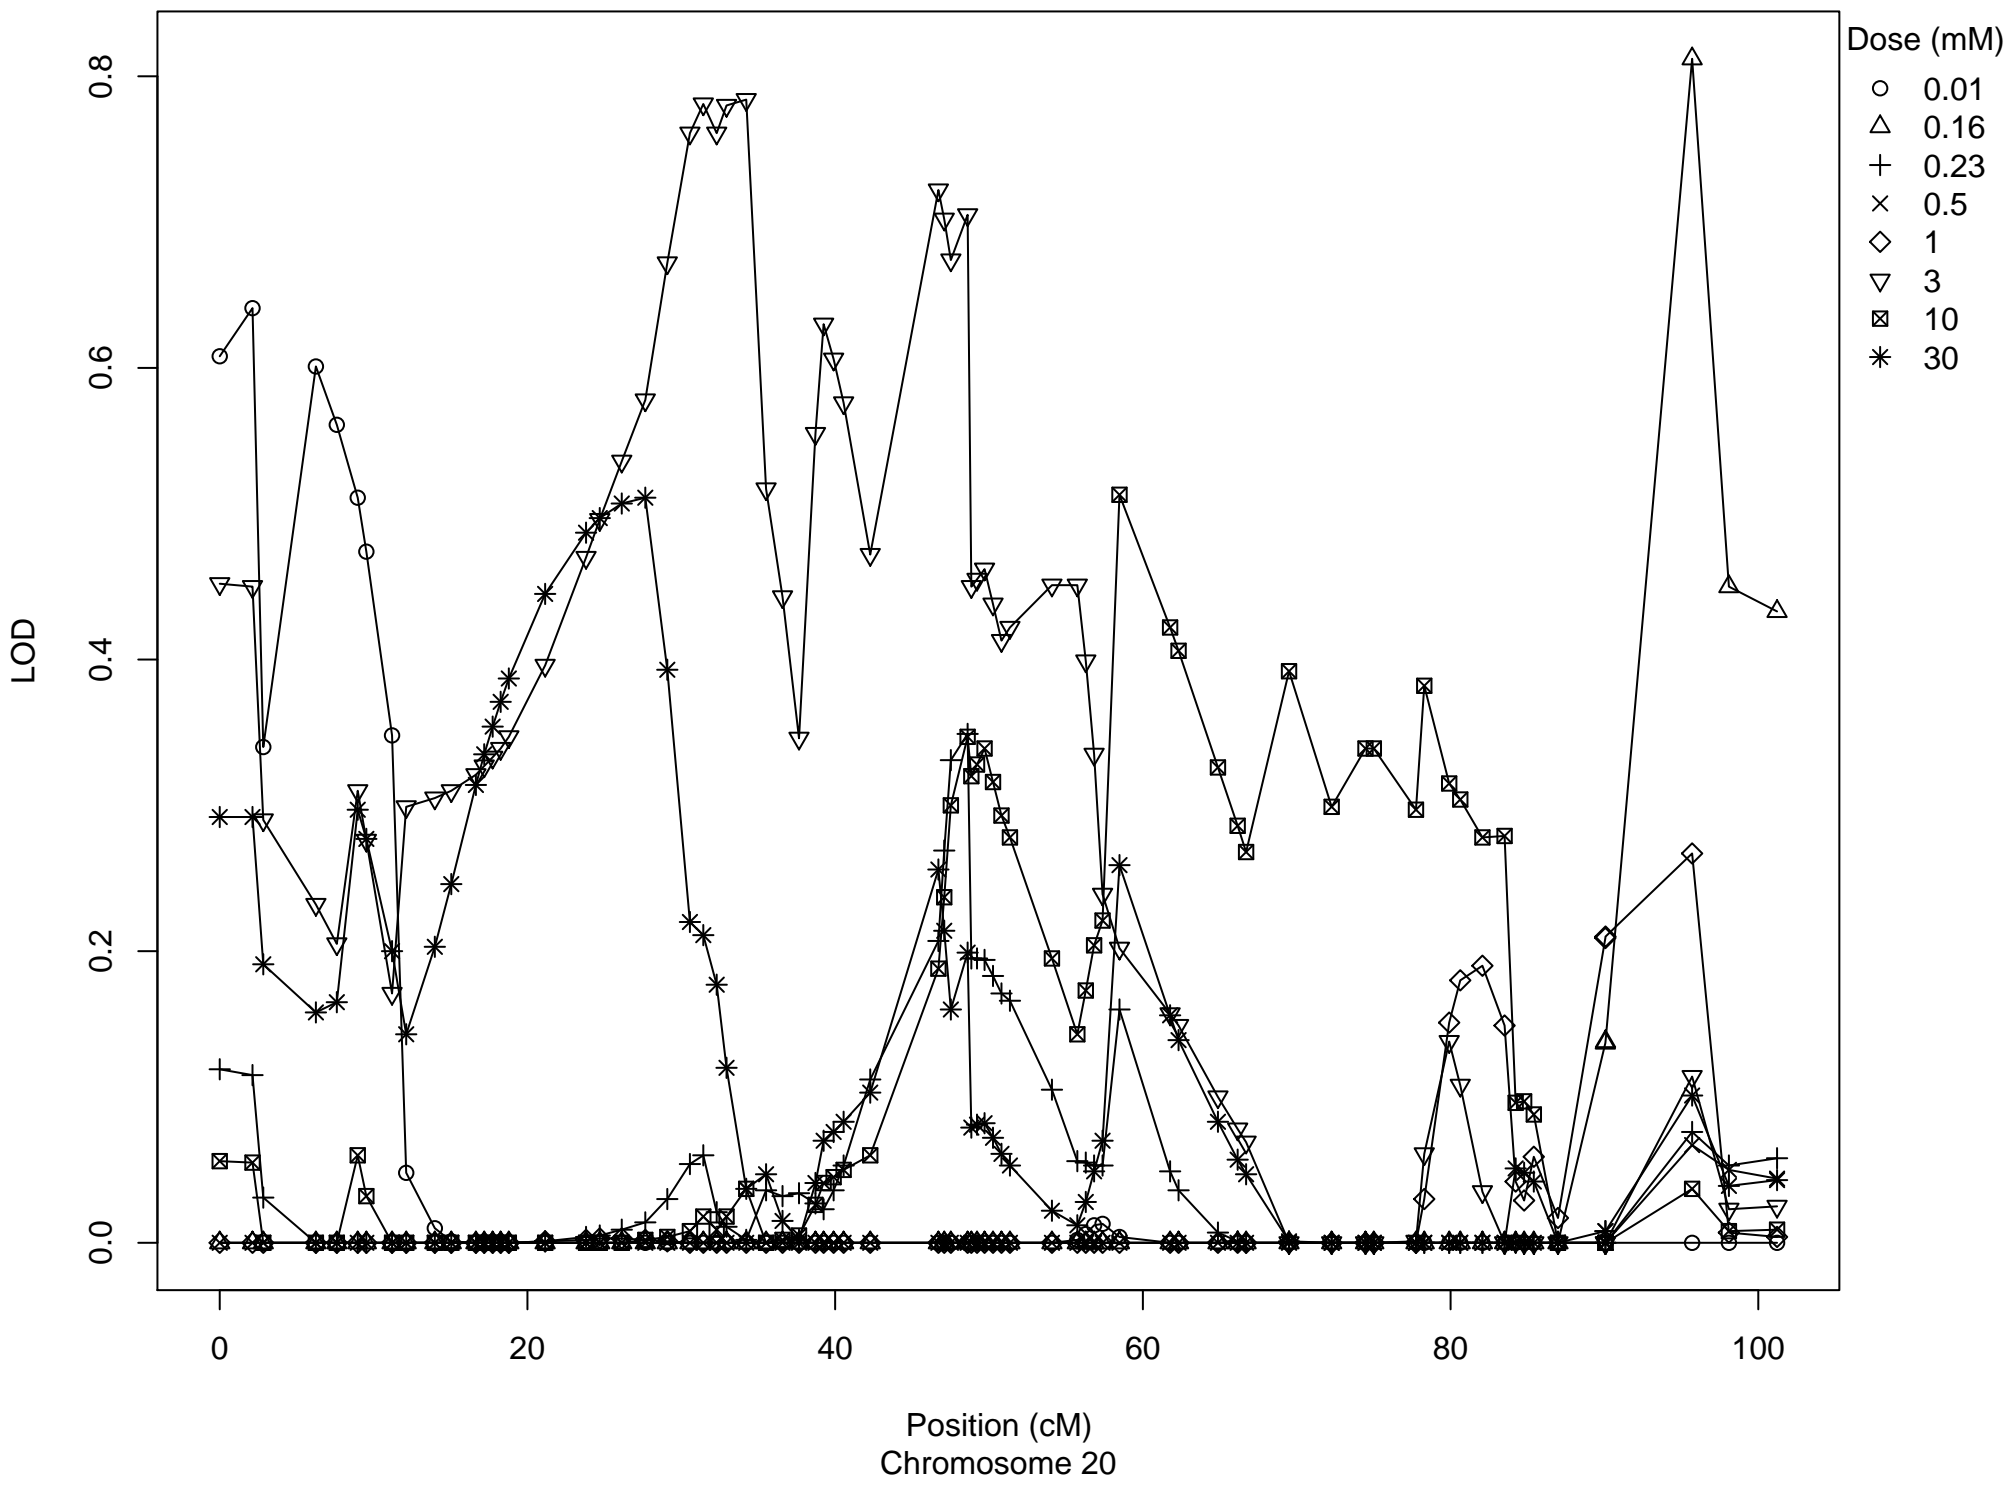



# 85A1 (85A1)

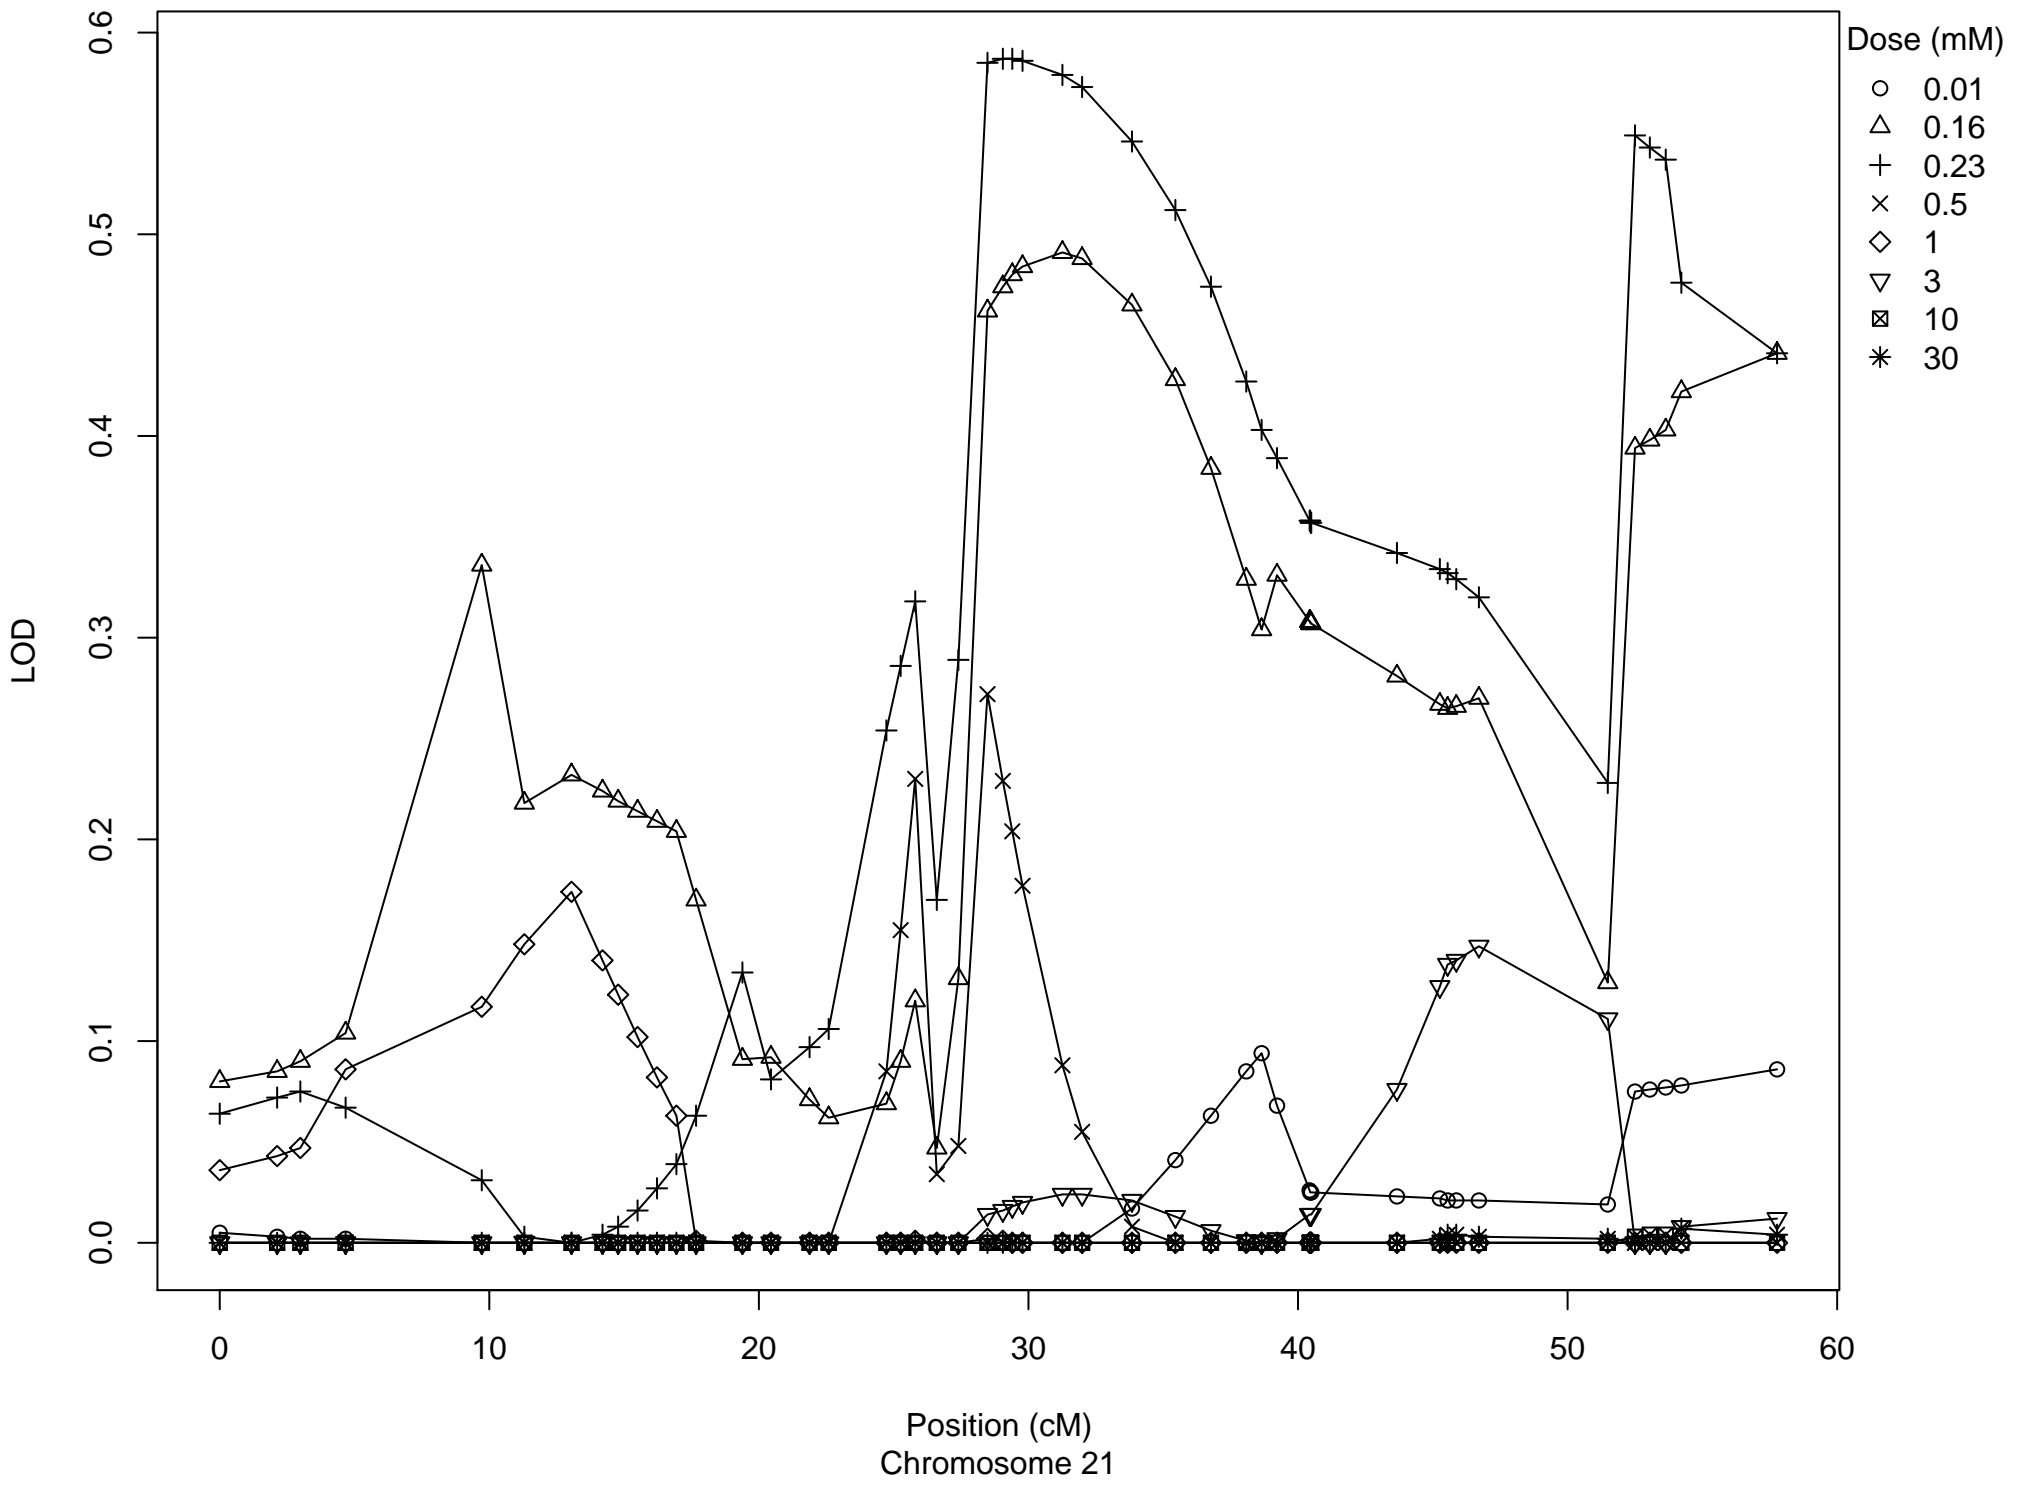



# 86A1 (86A1)

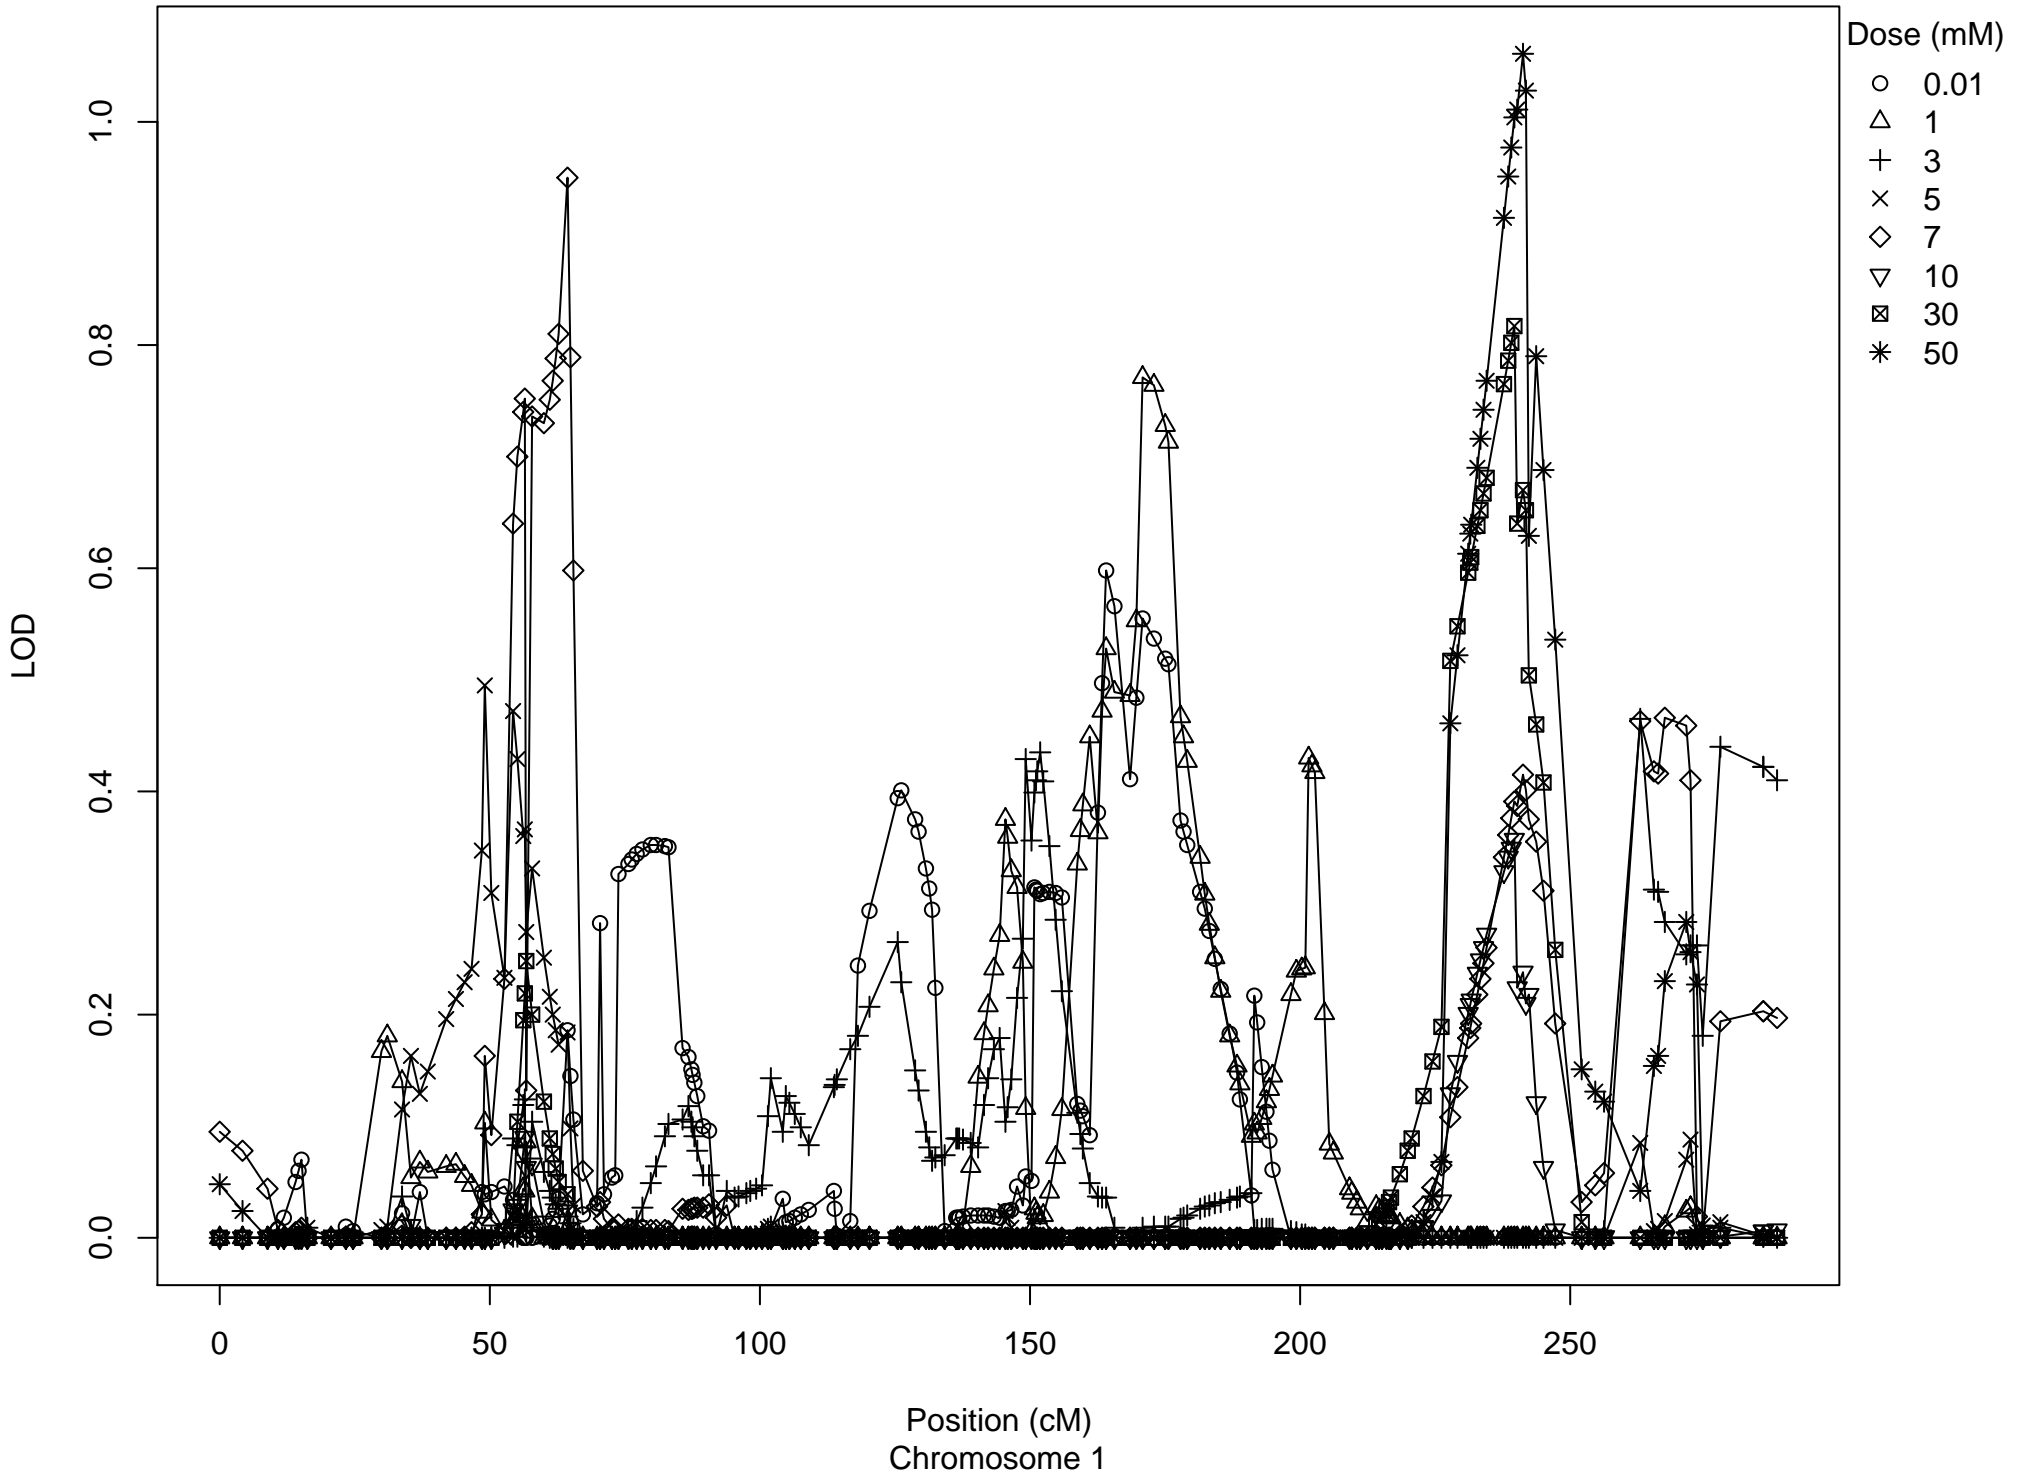

# 86A1 (86A1)

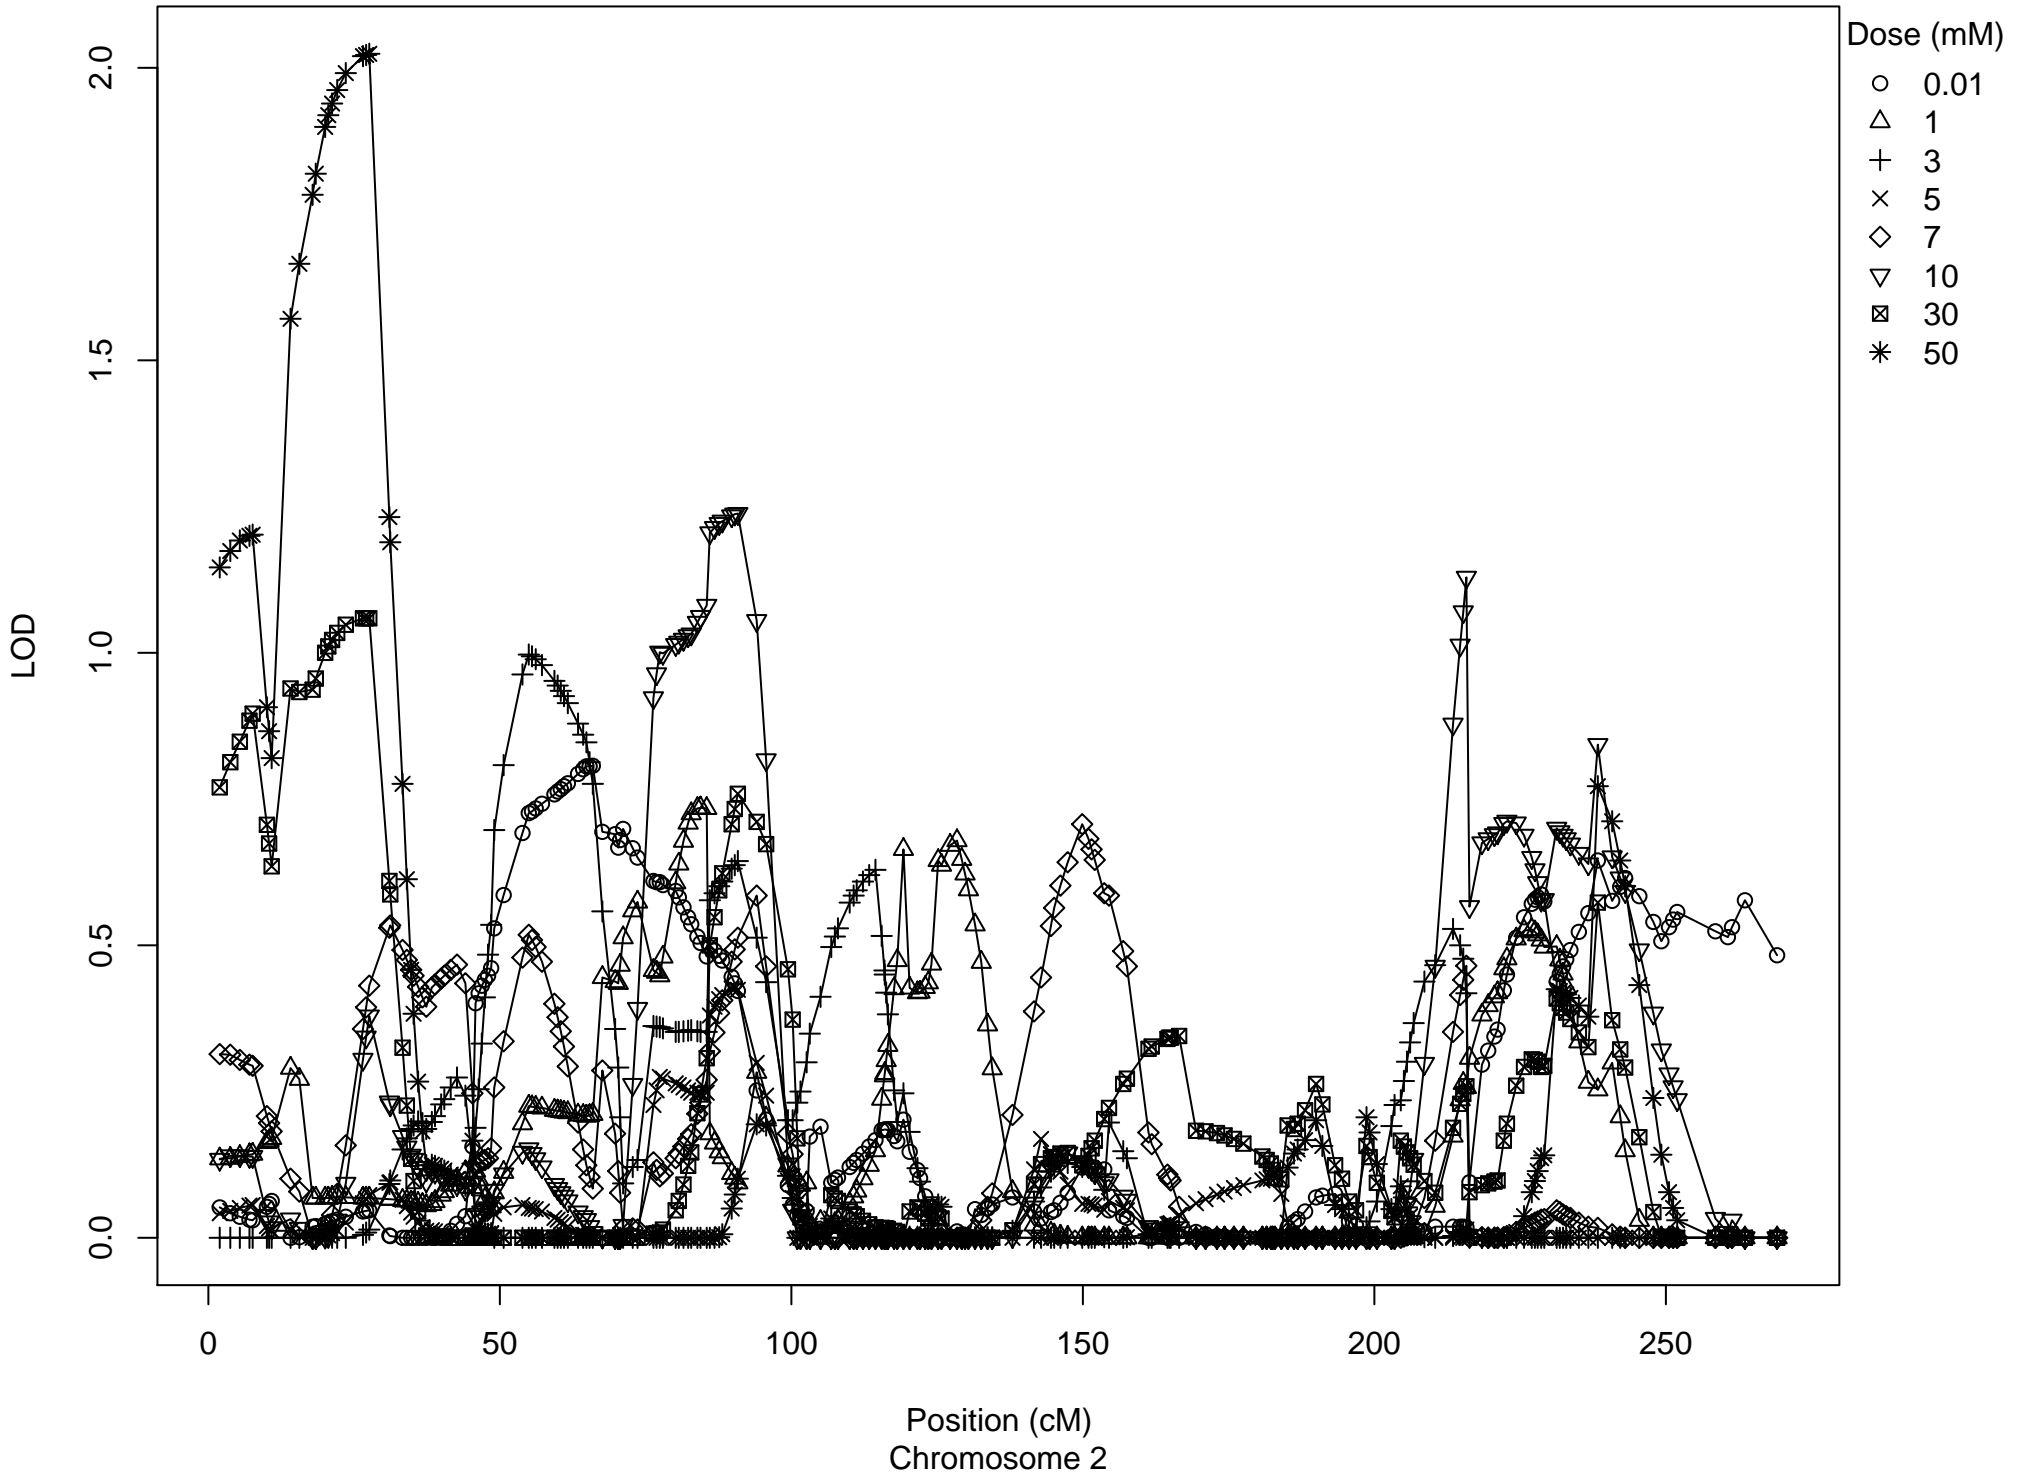

# 86A1 (86A1)

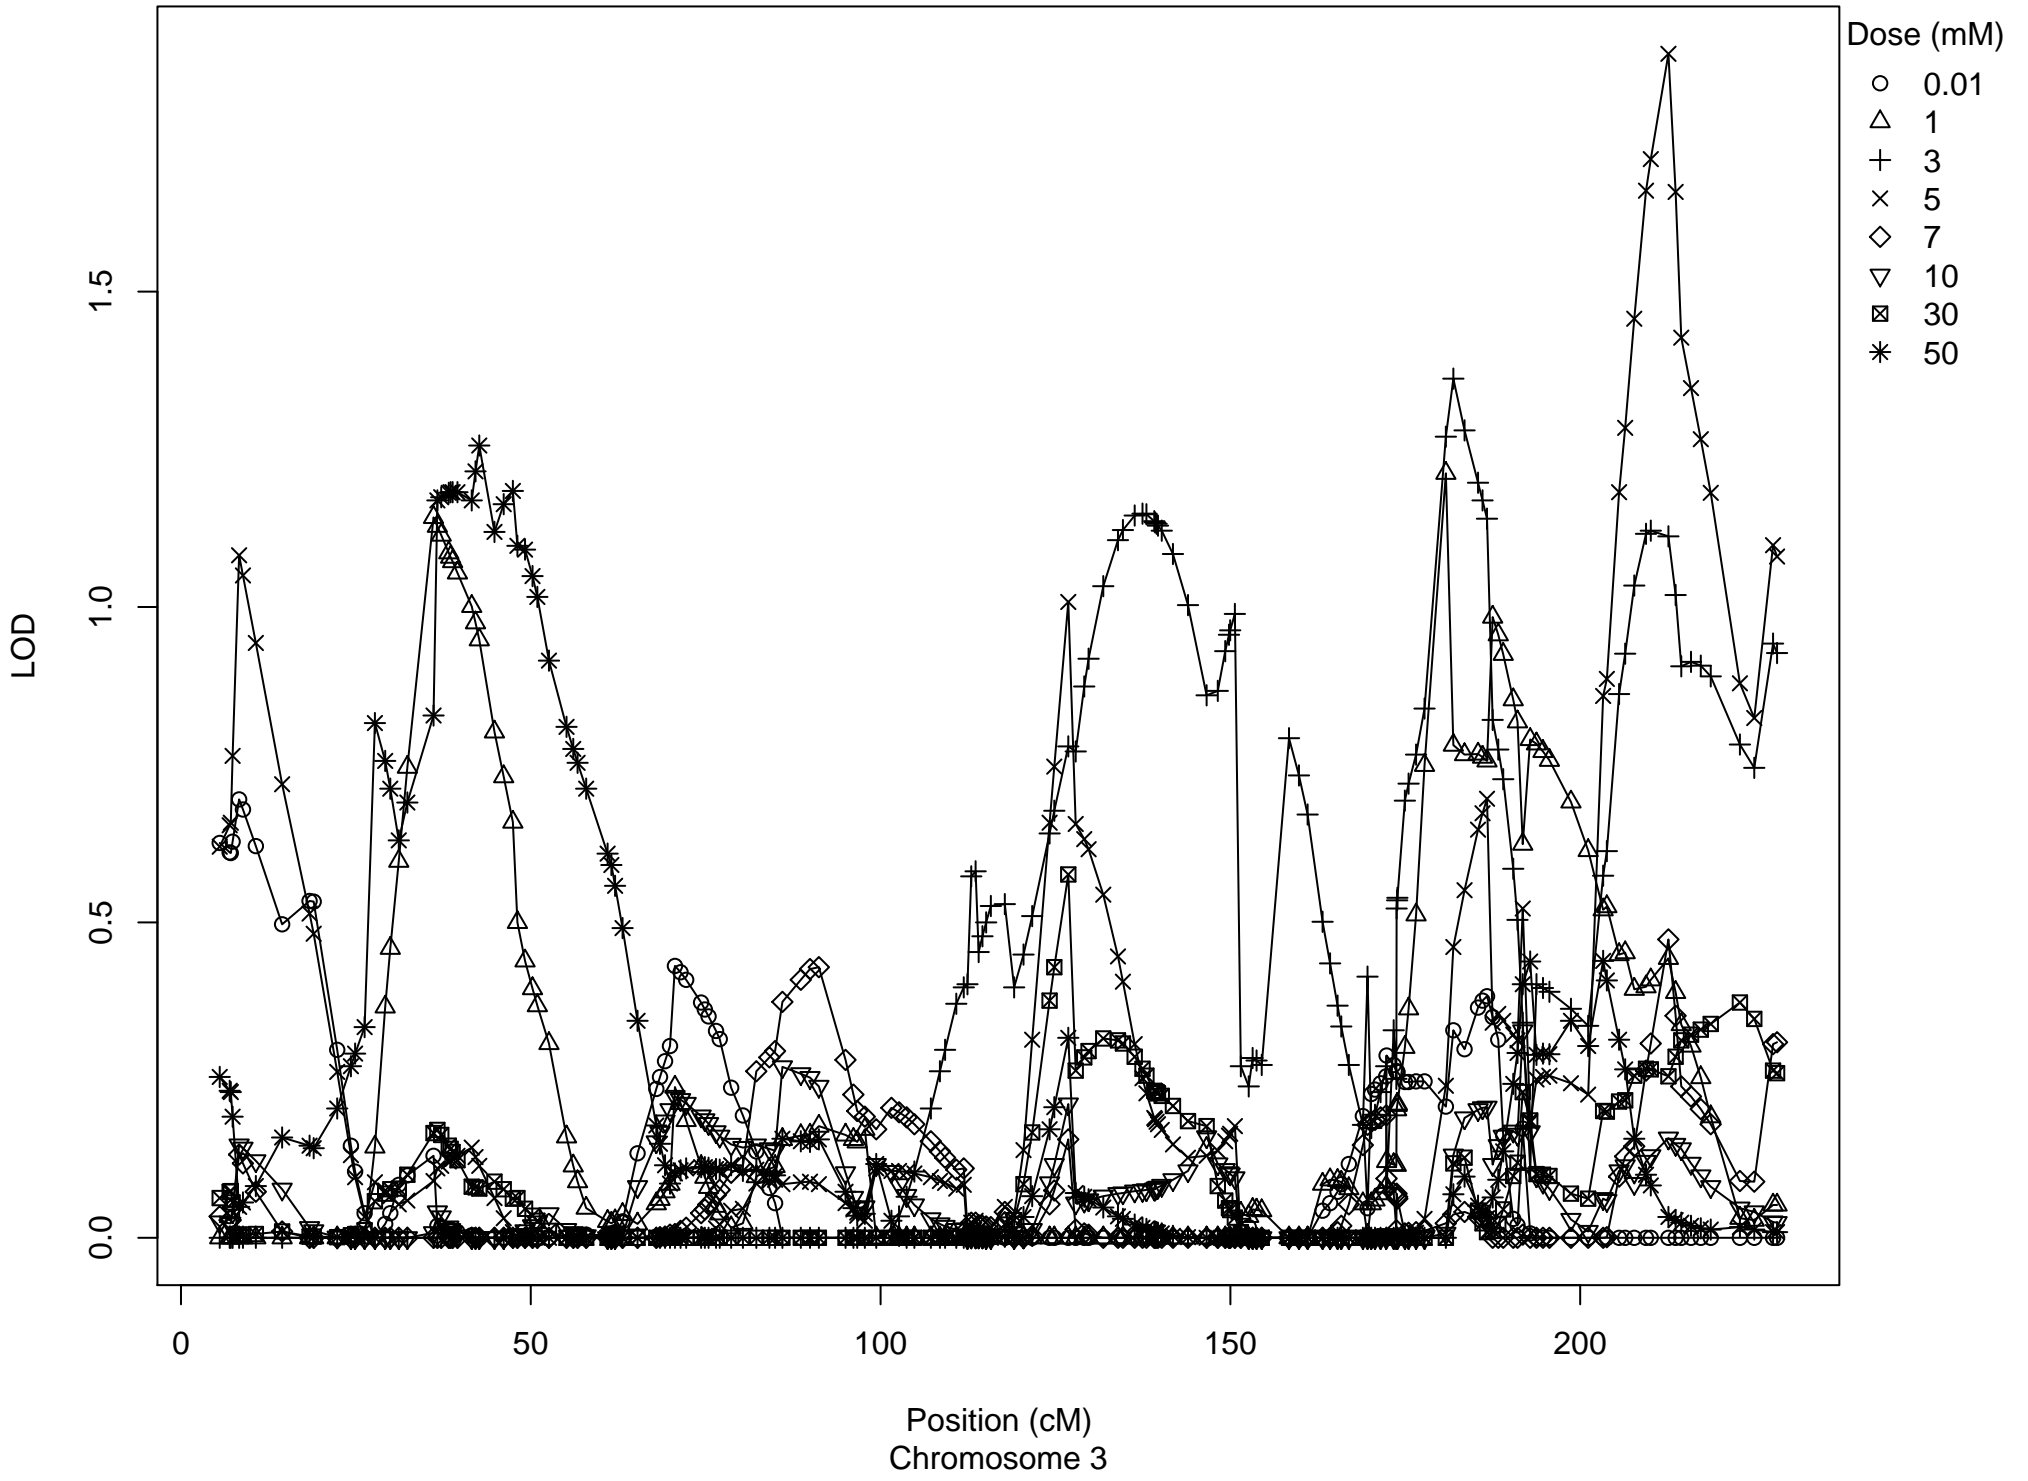



# 86A1 (86A1)

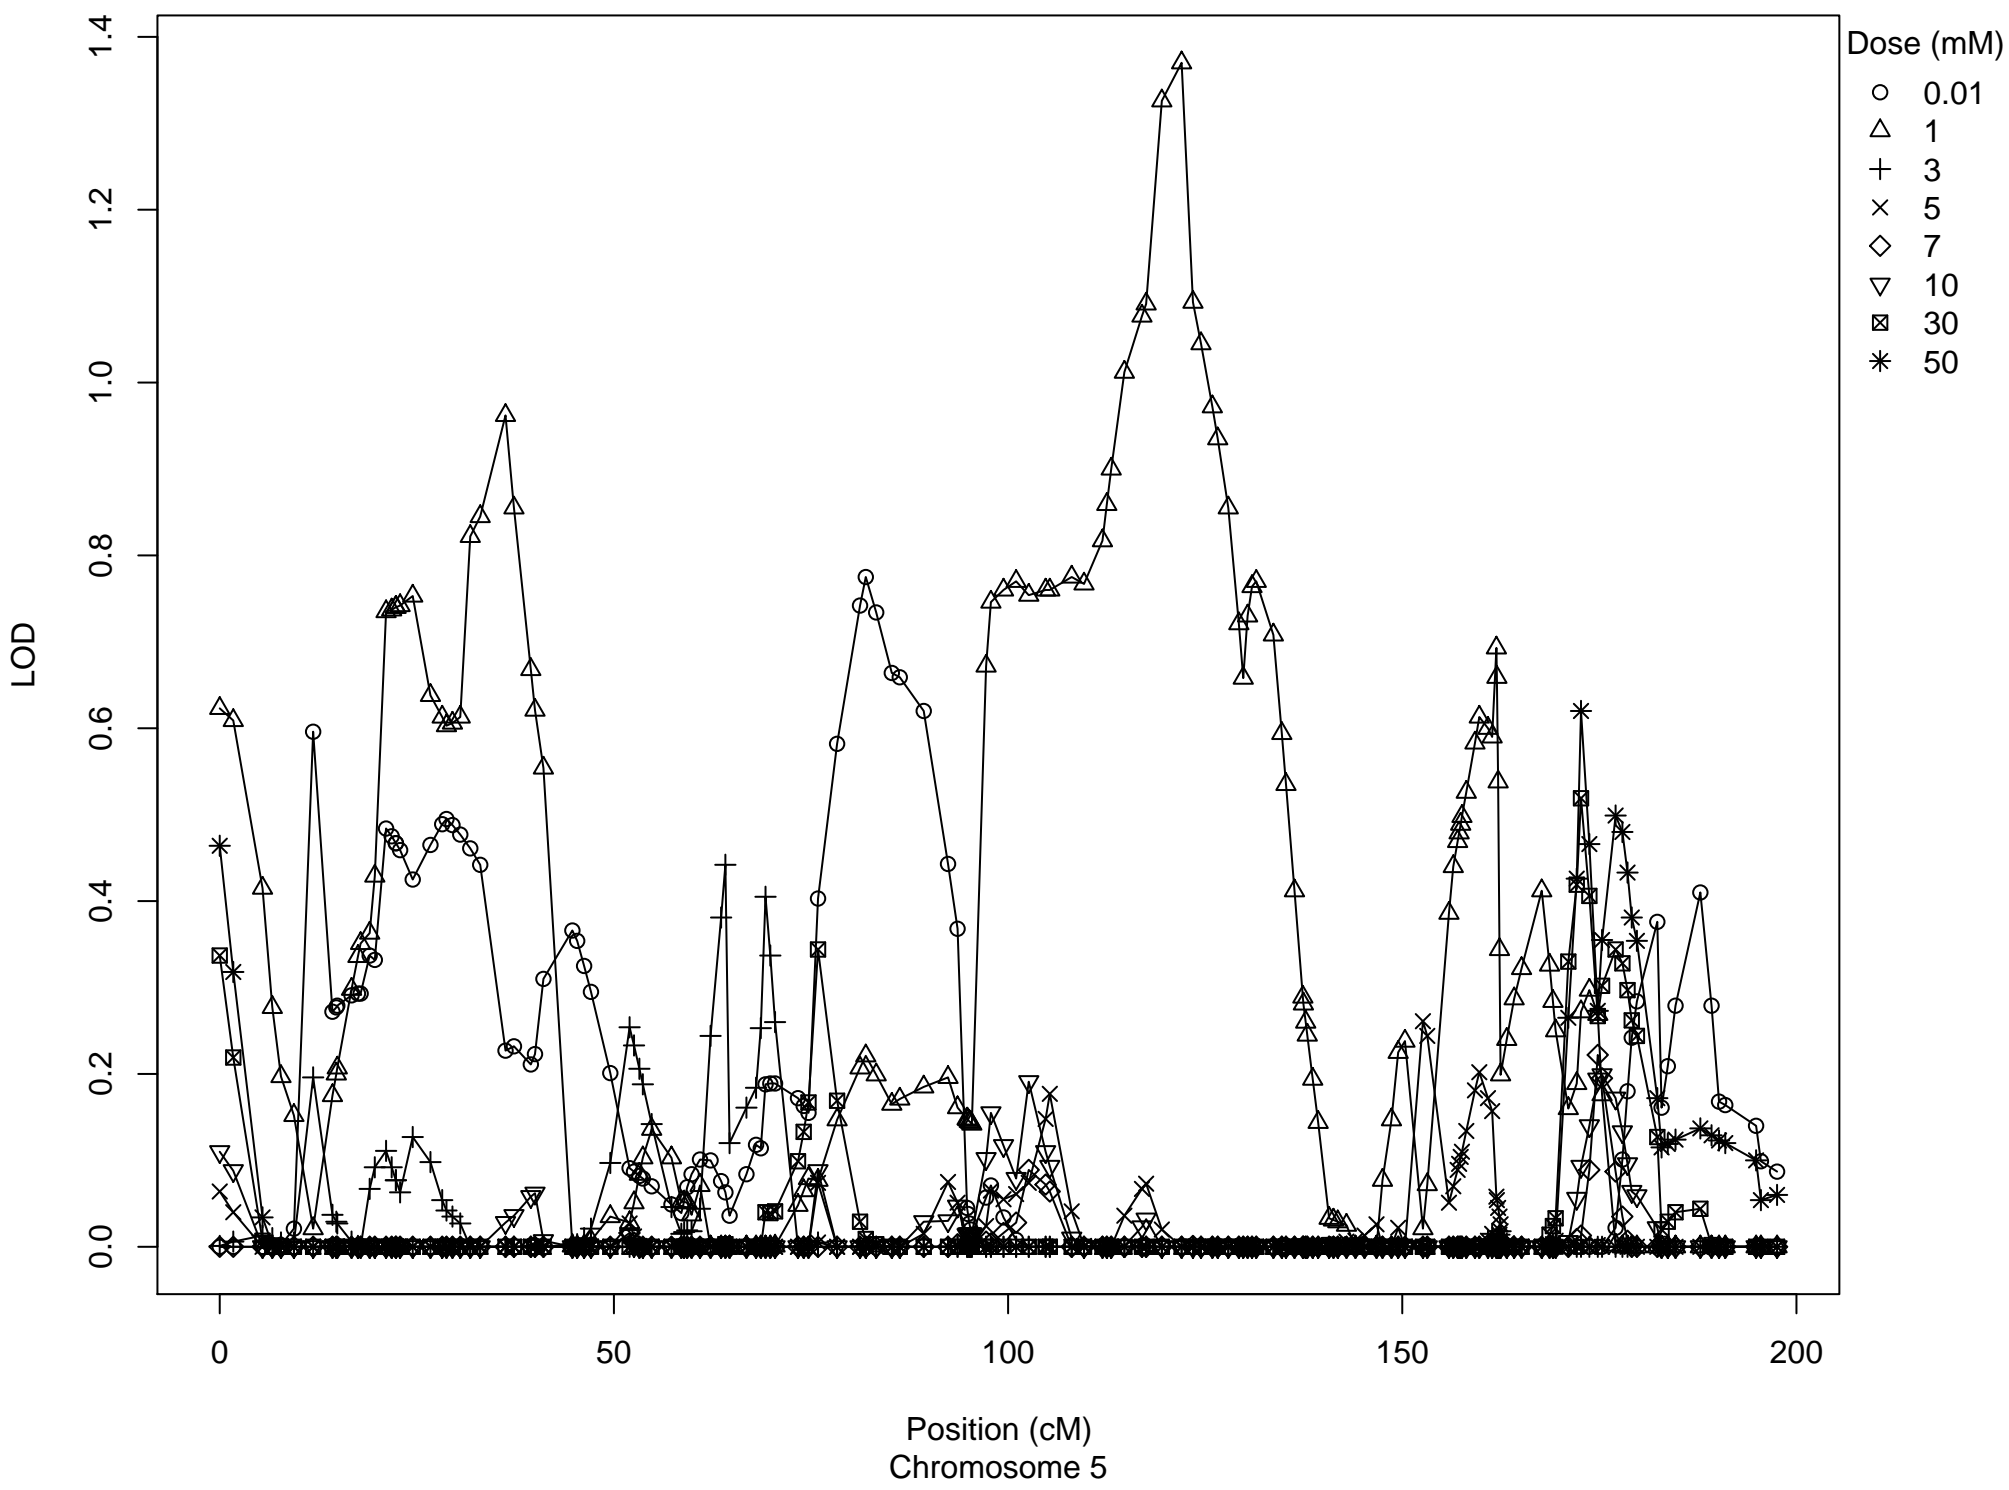





# 86A1 (86A1)

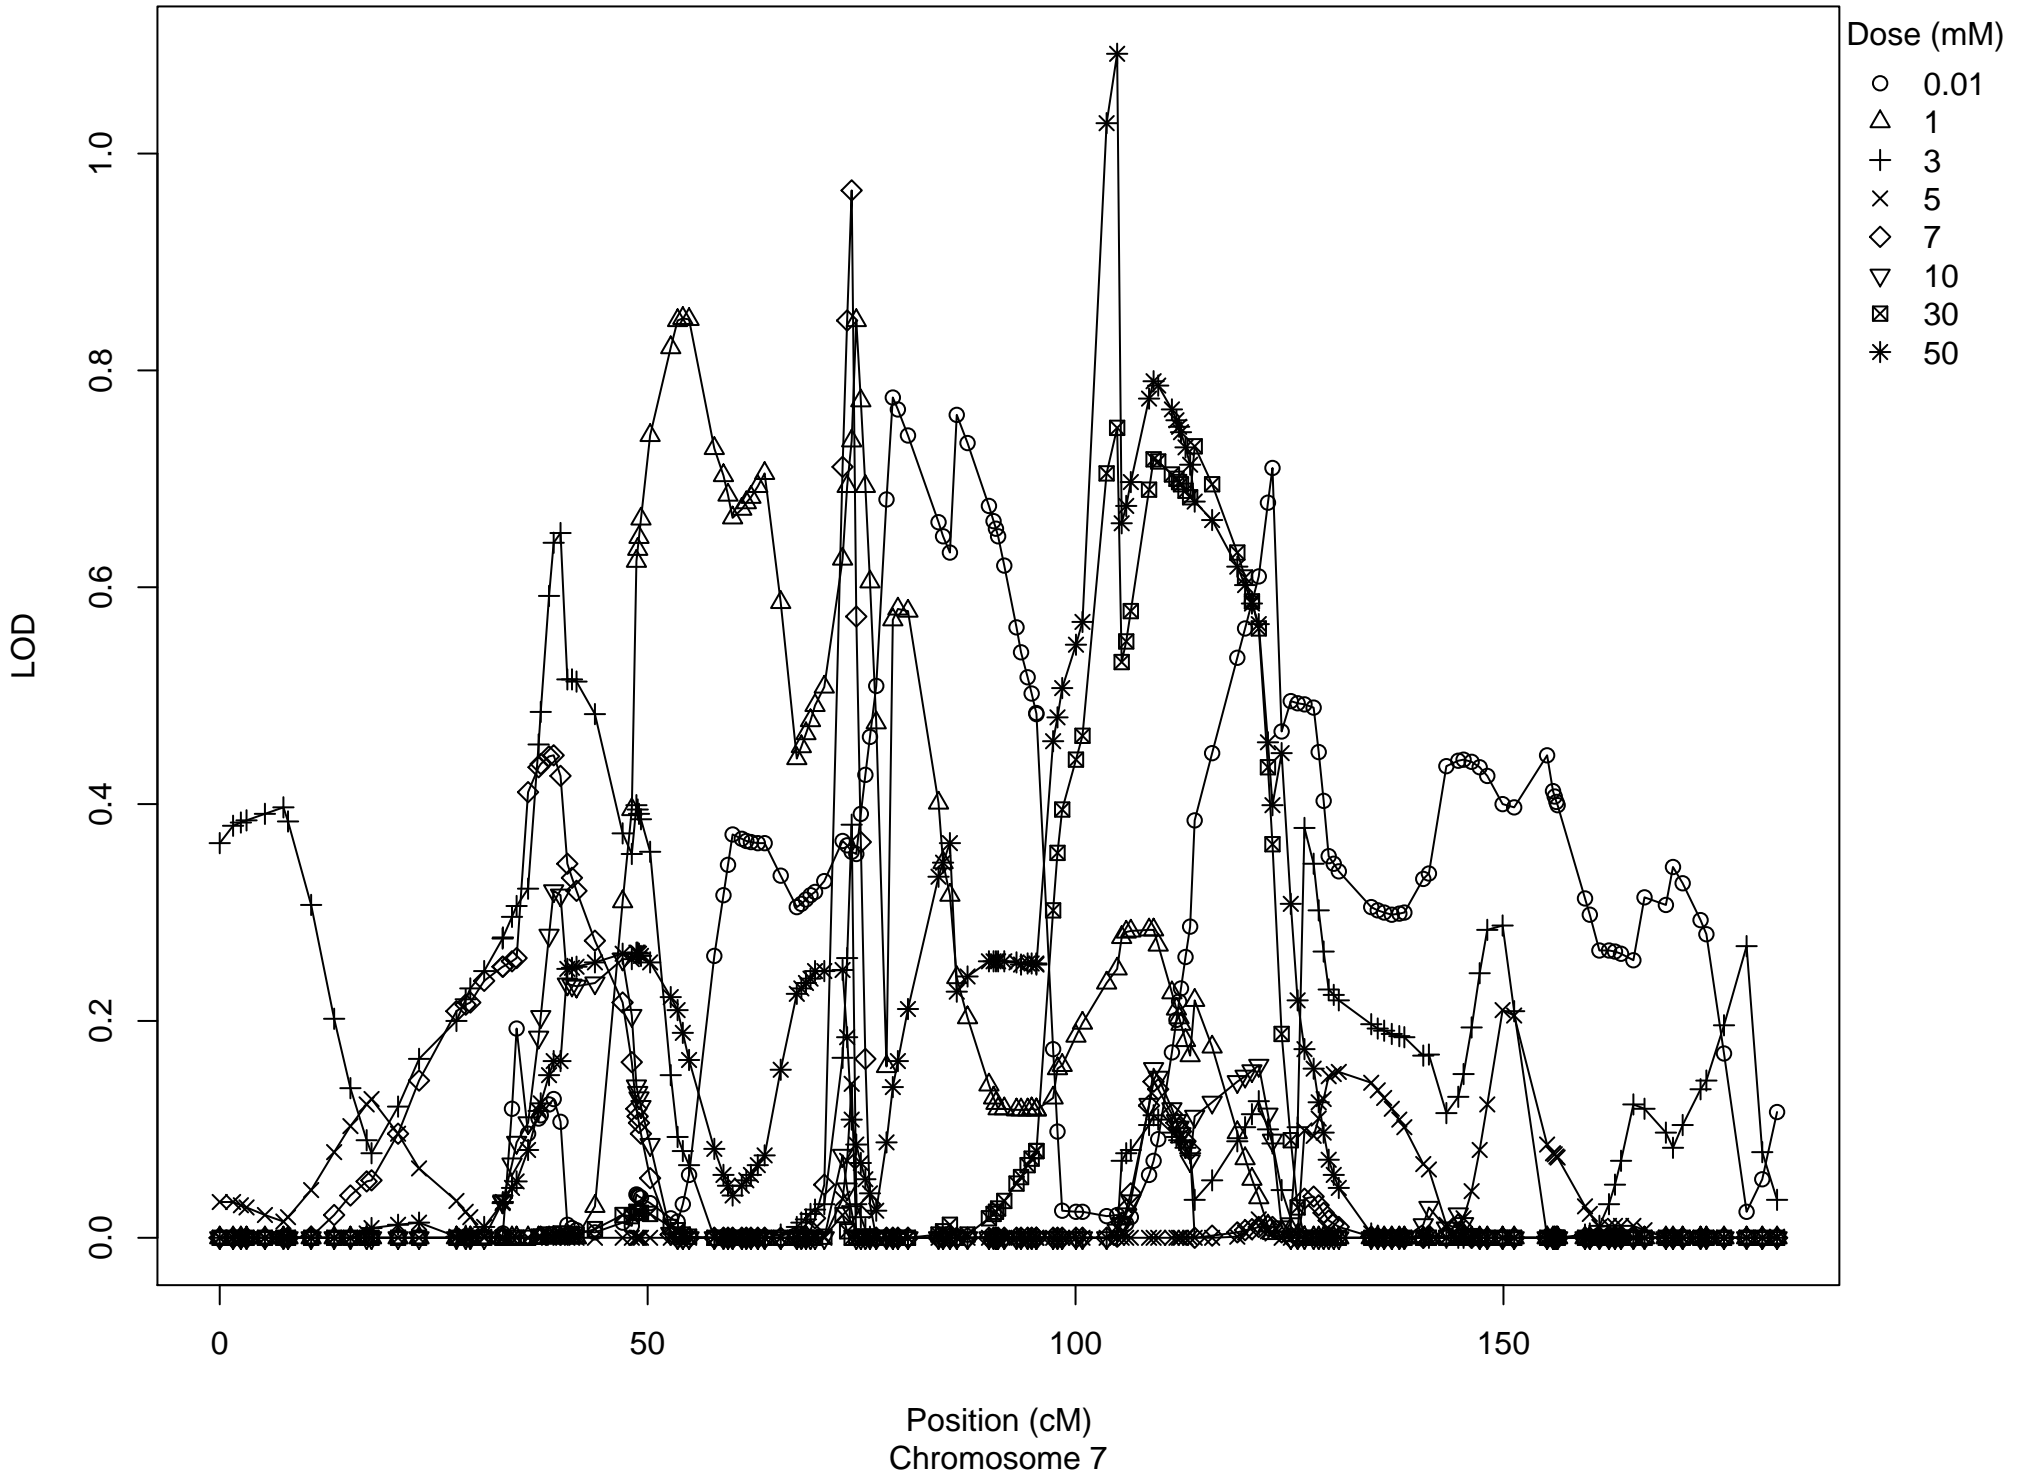

# 86A1 (86A1)

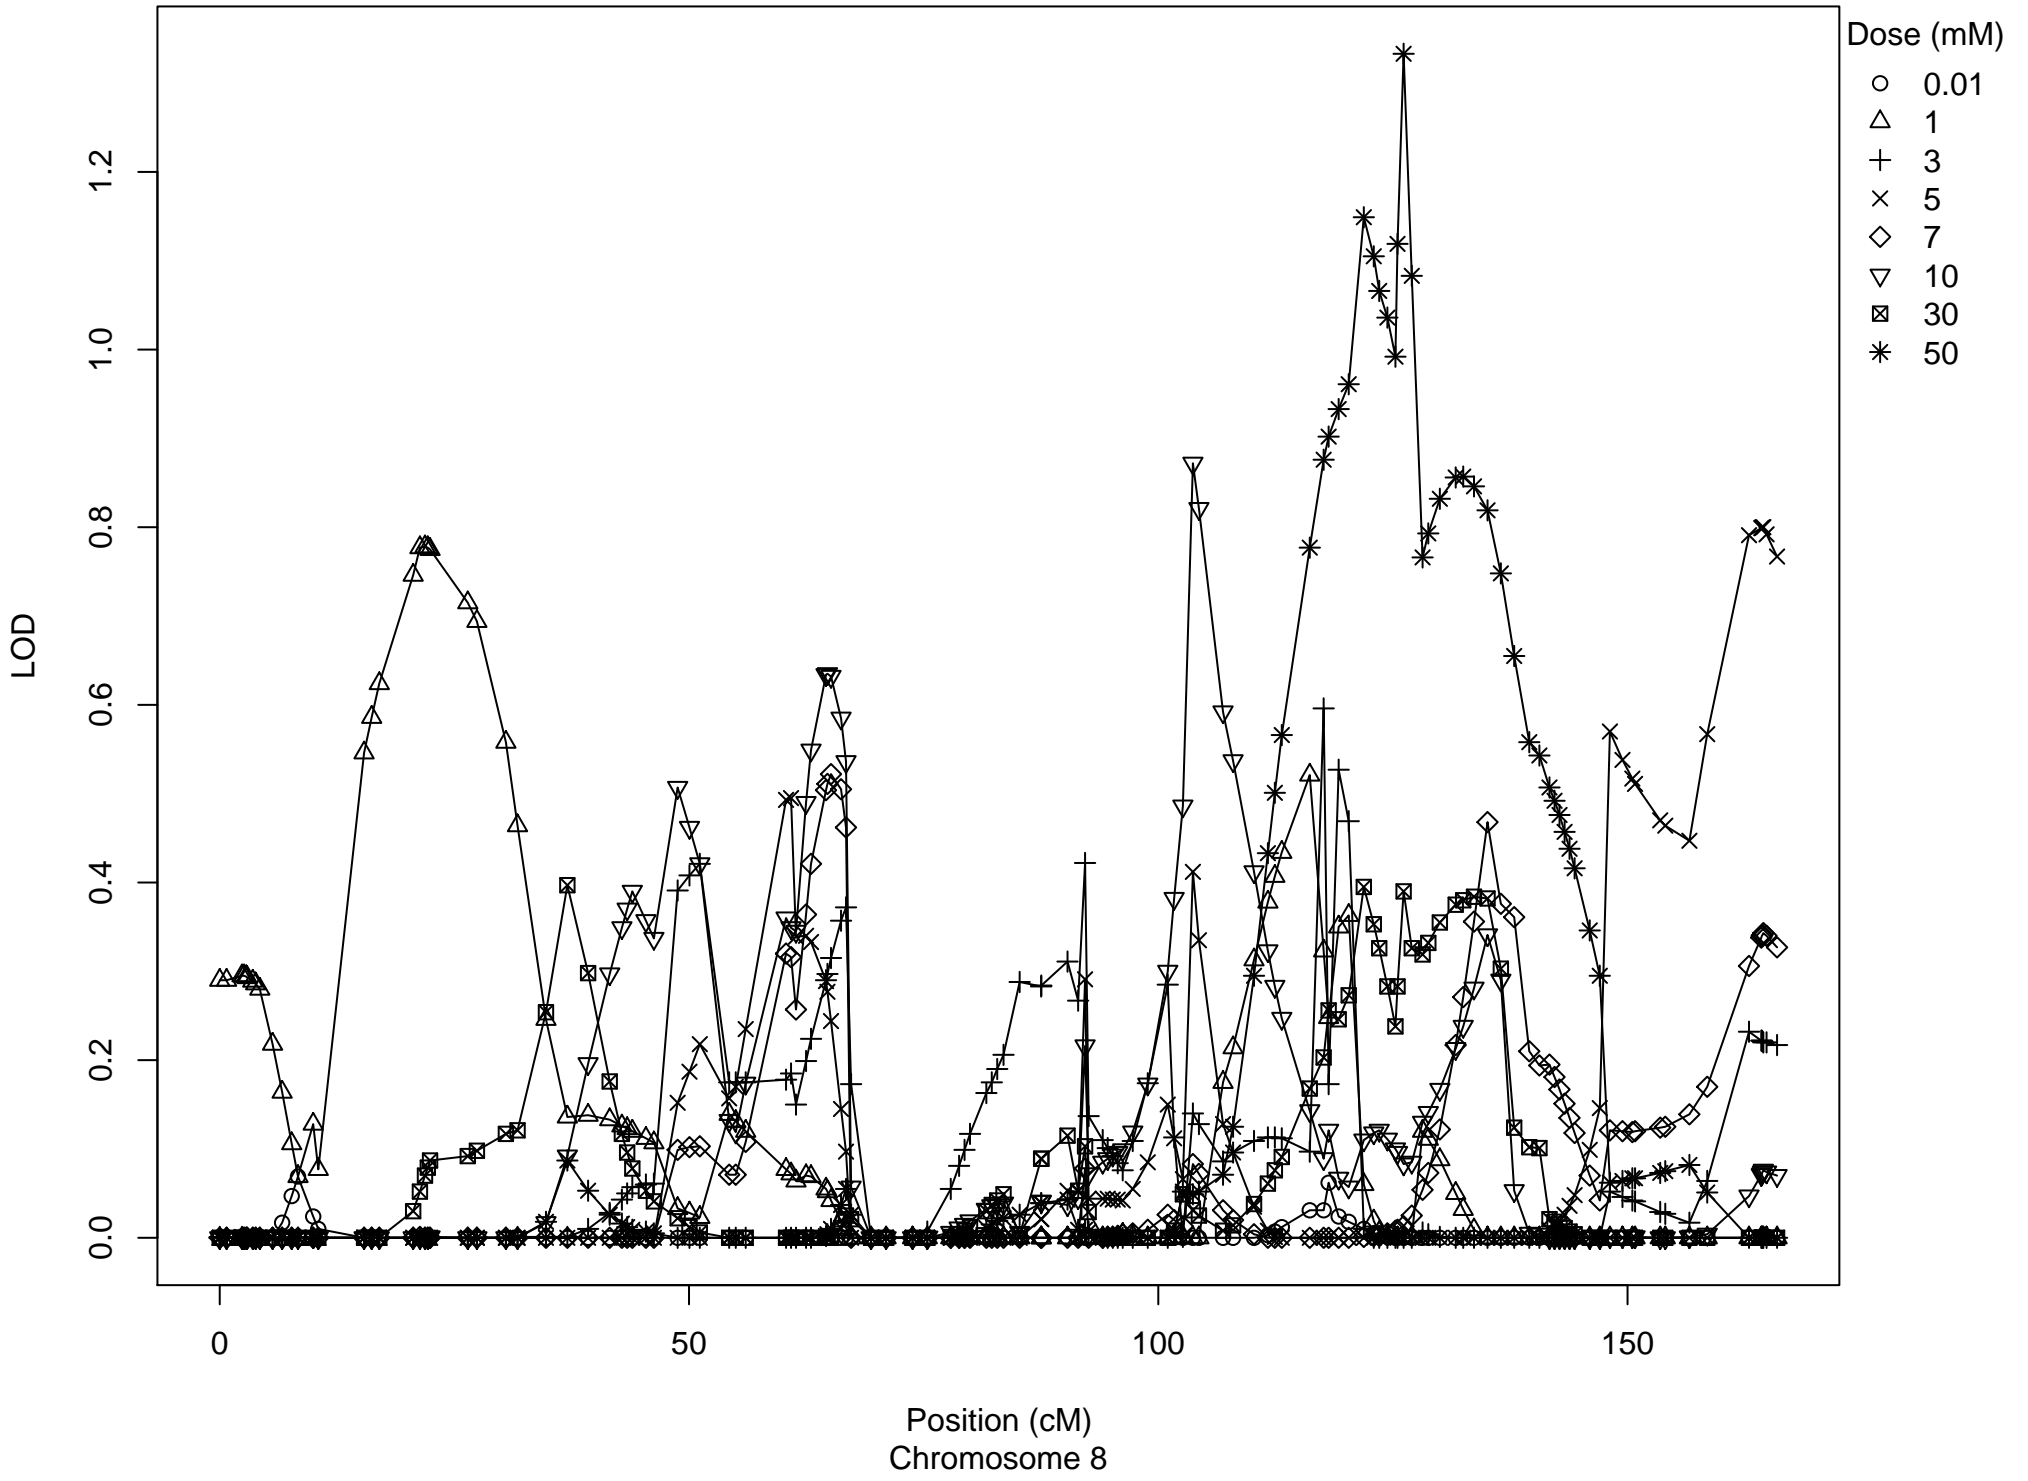







# 86A1 (86A1)

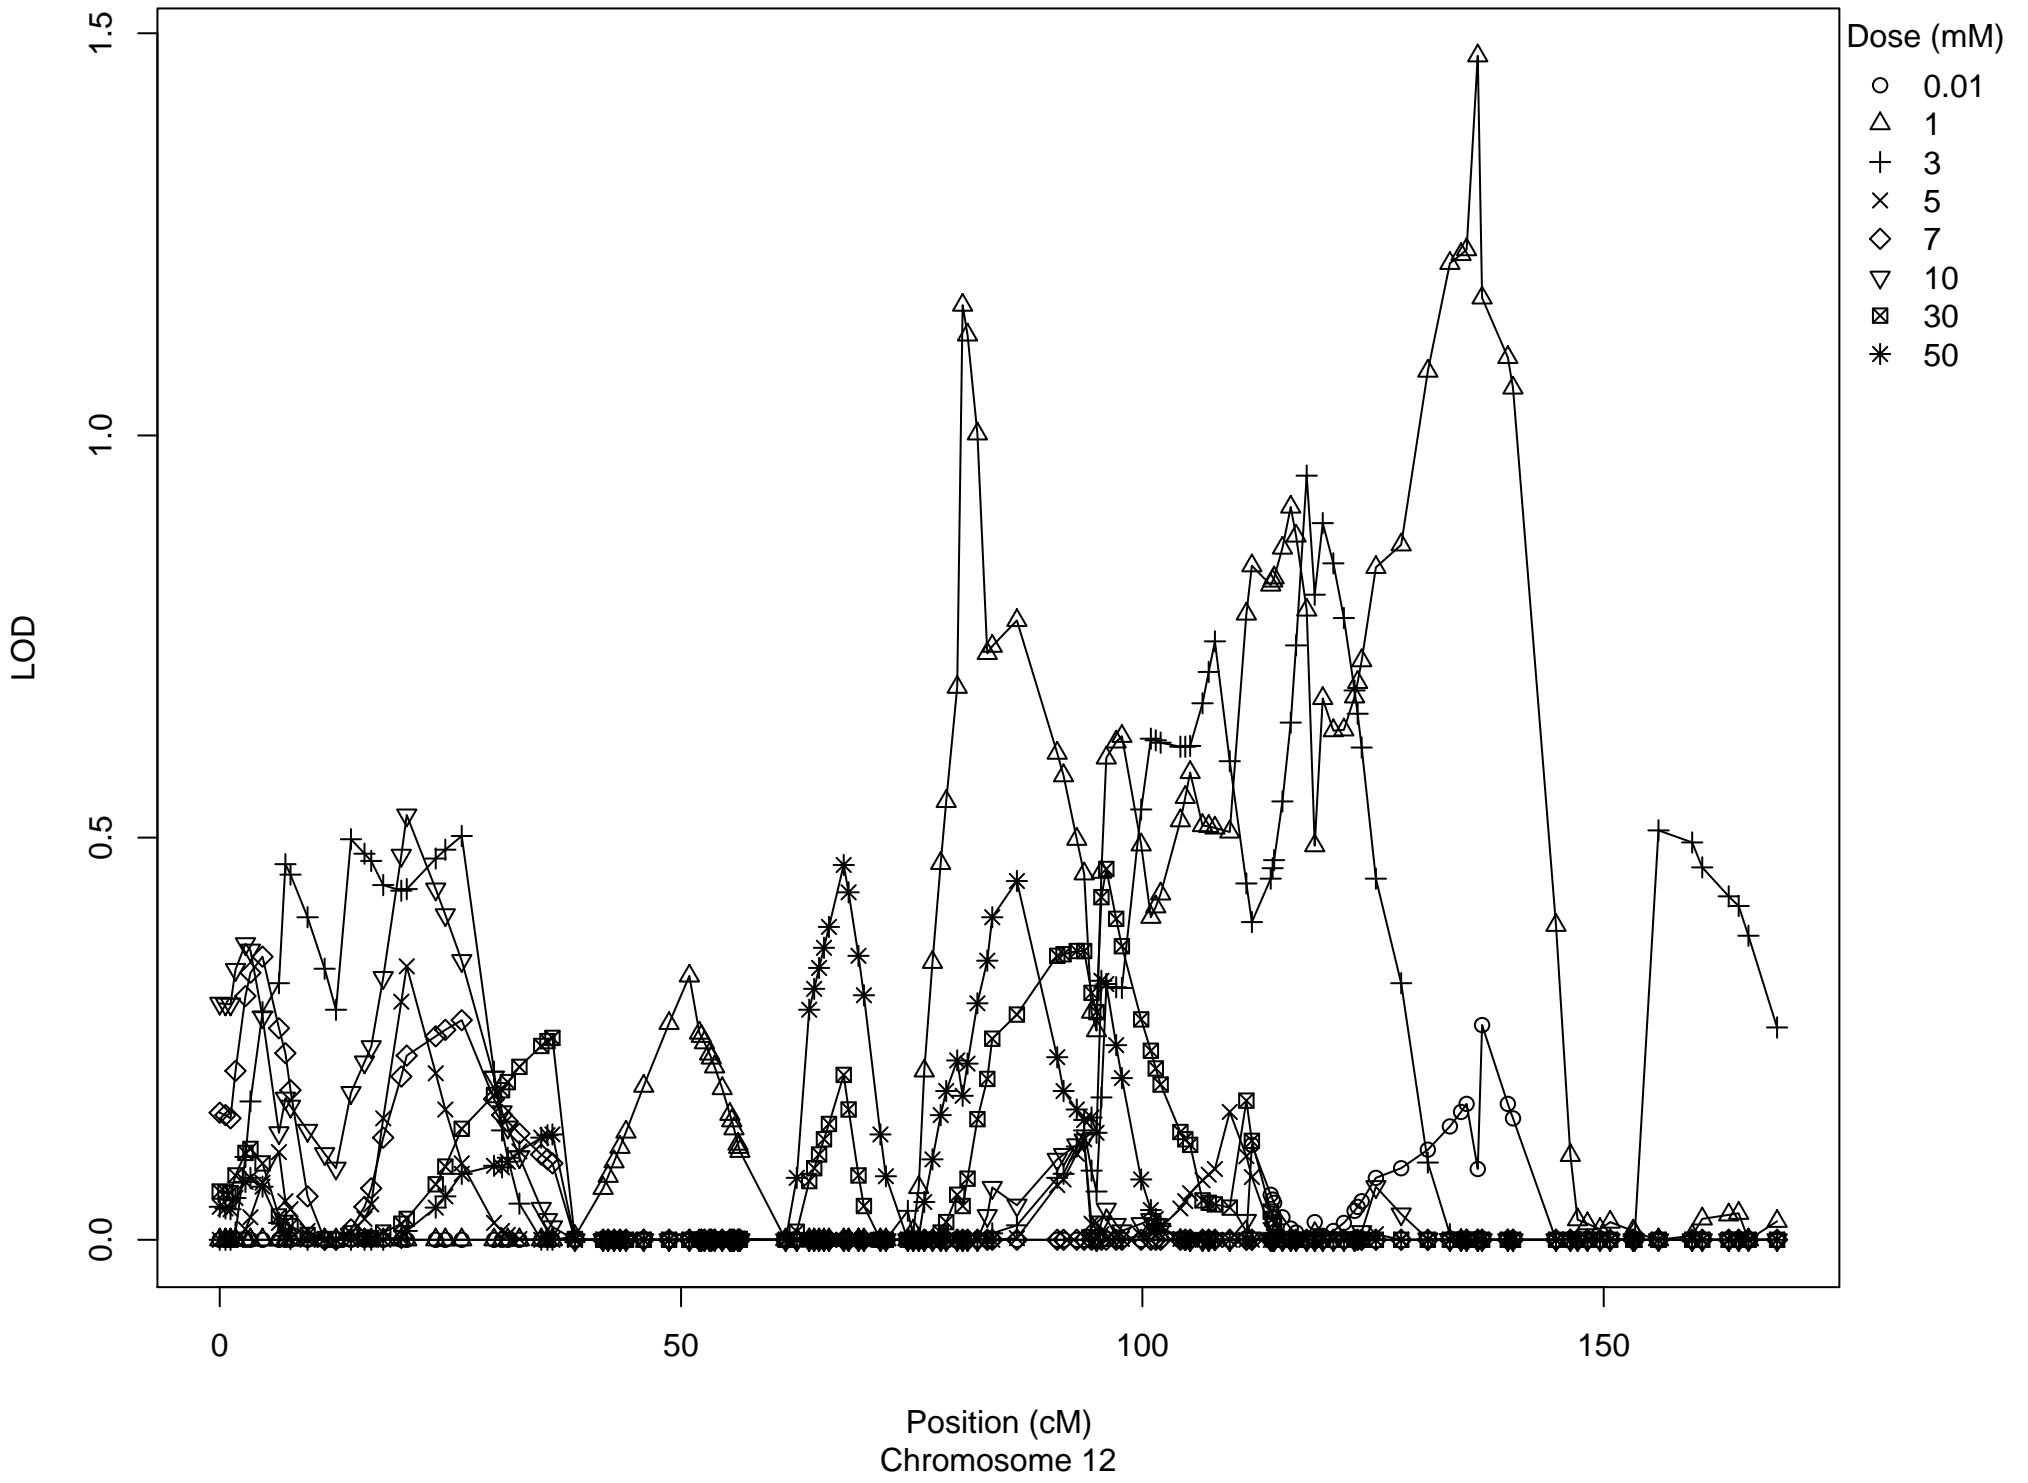

# 86A1 (86A1)

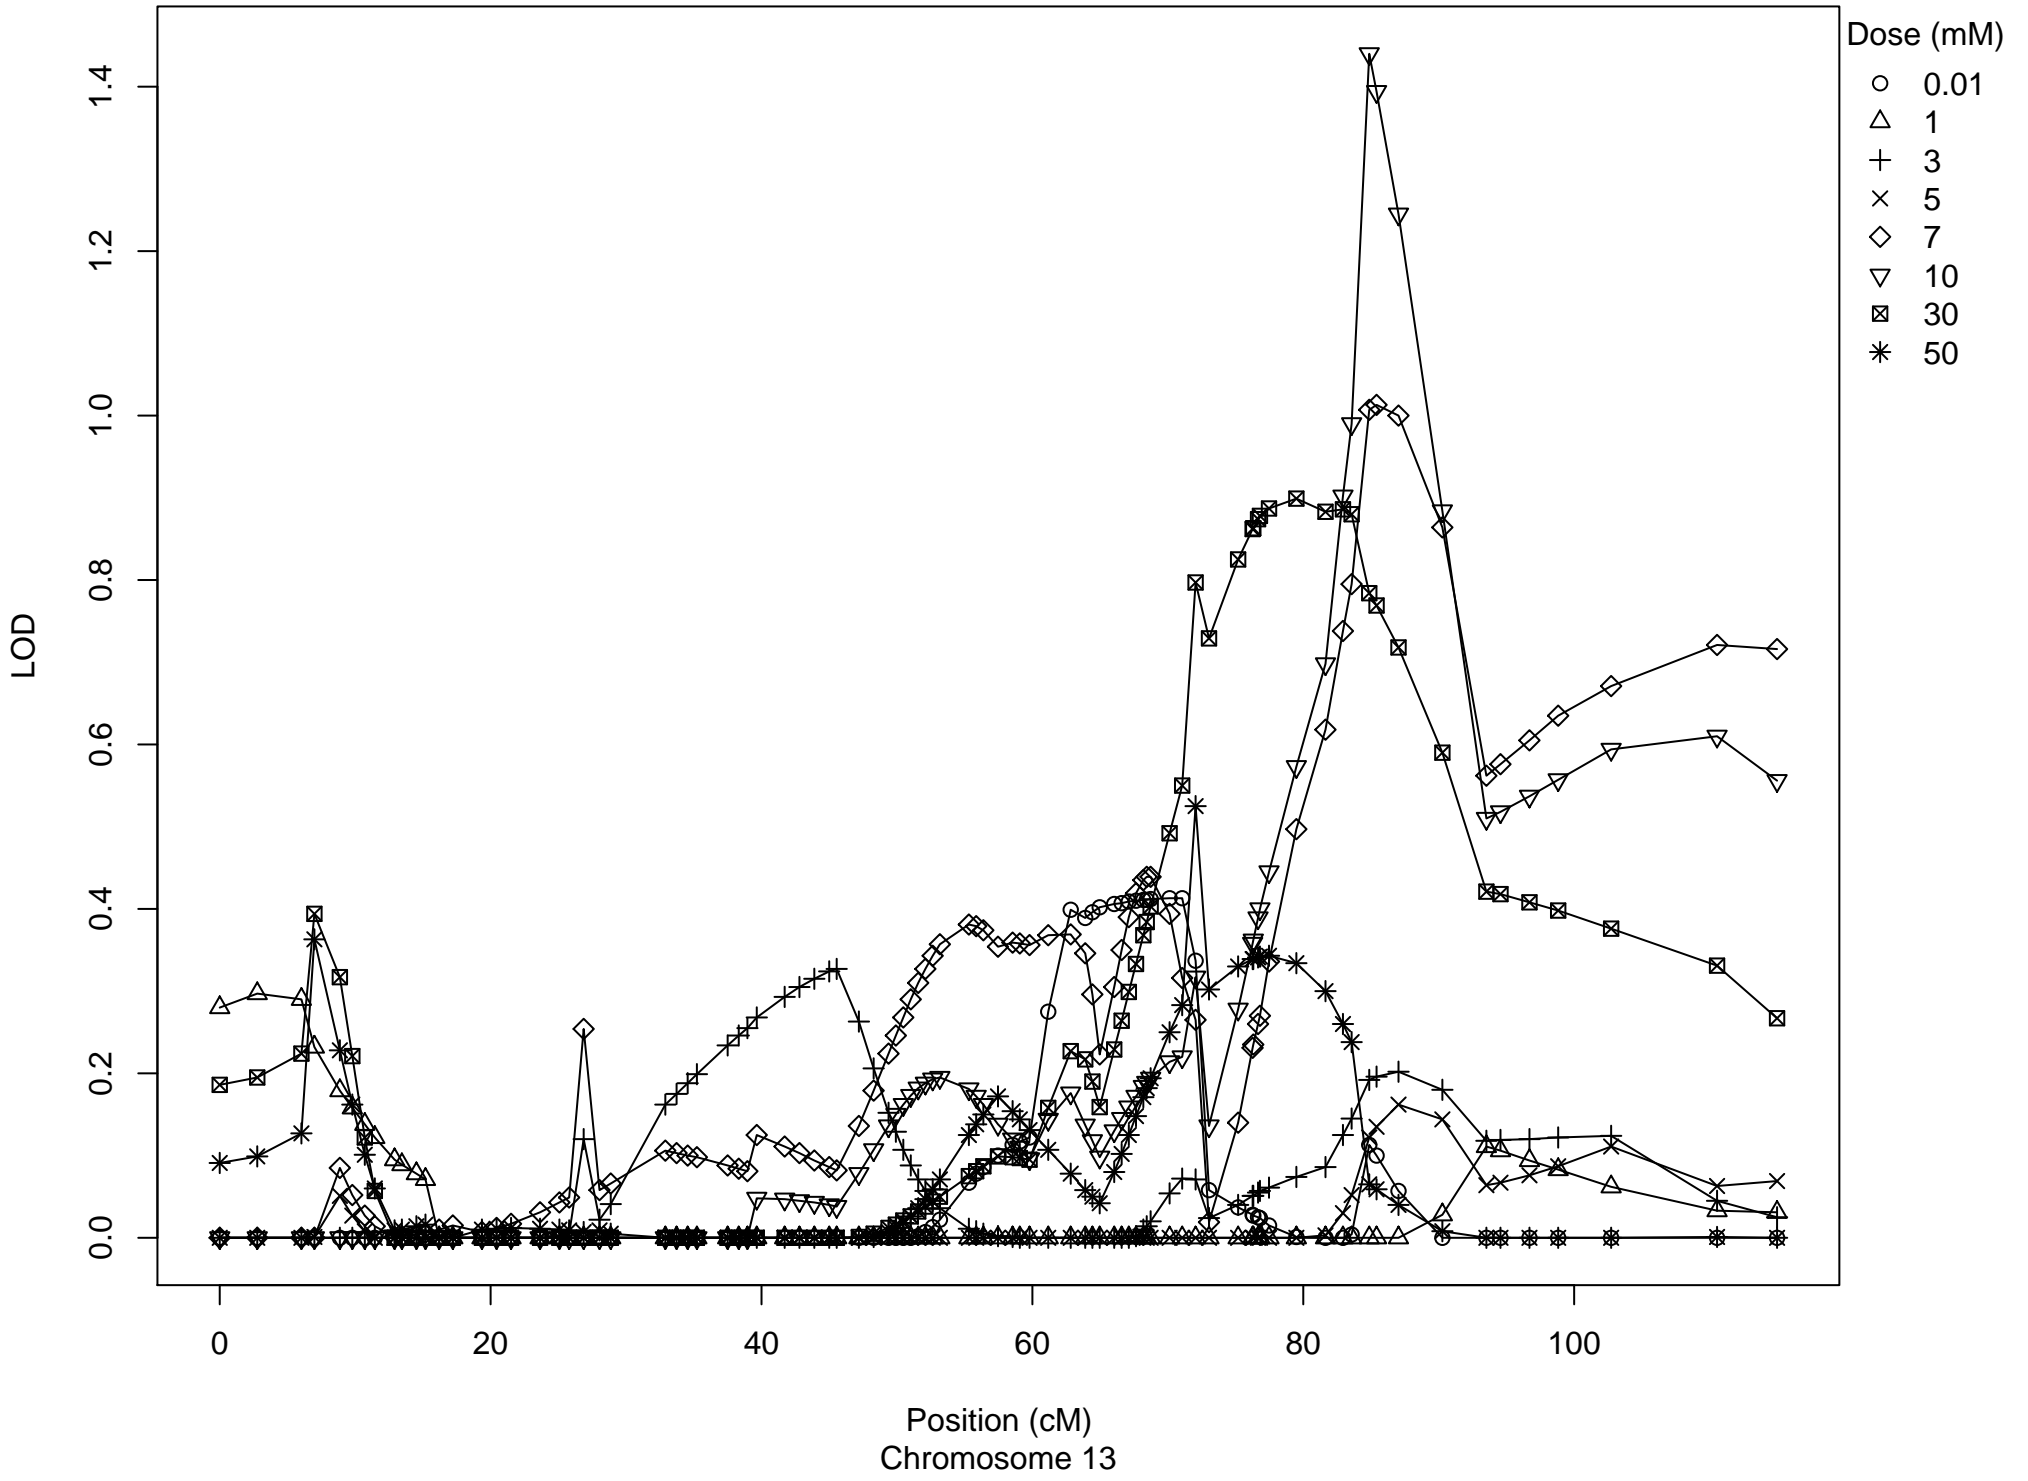

# 86A1 (86A1)

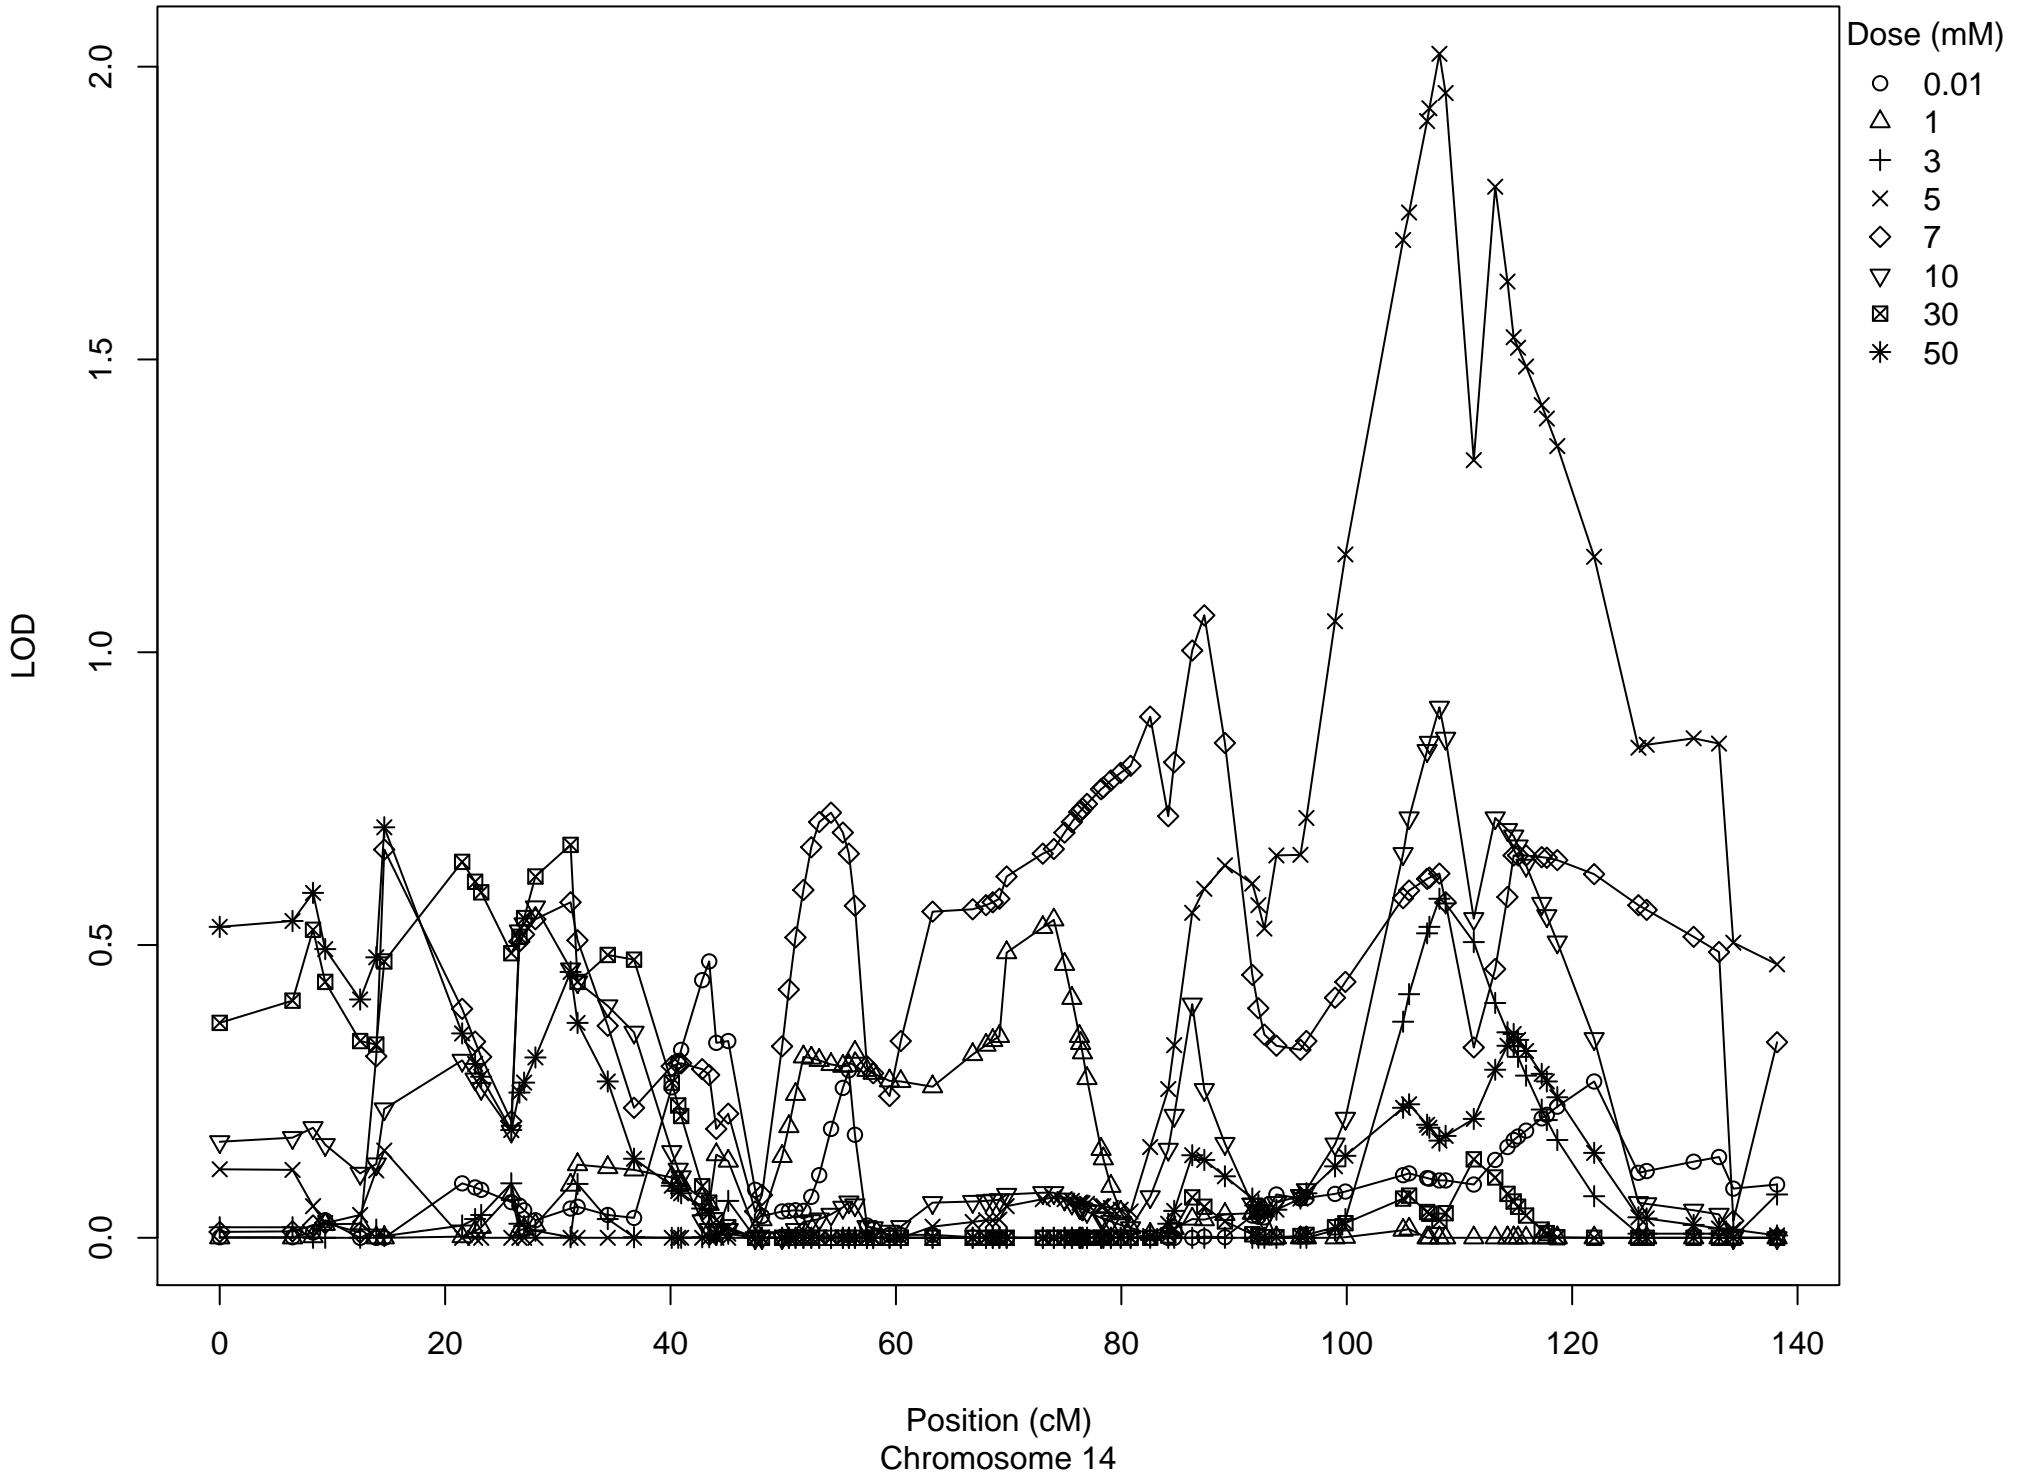



# 86A1 (86A1)

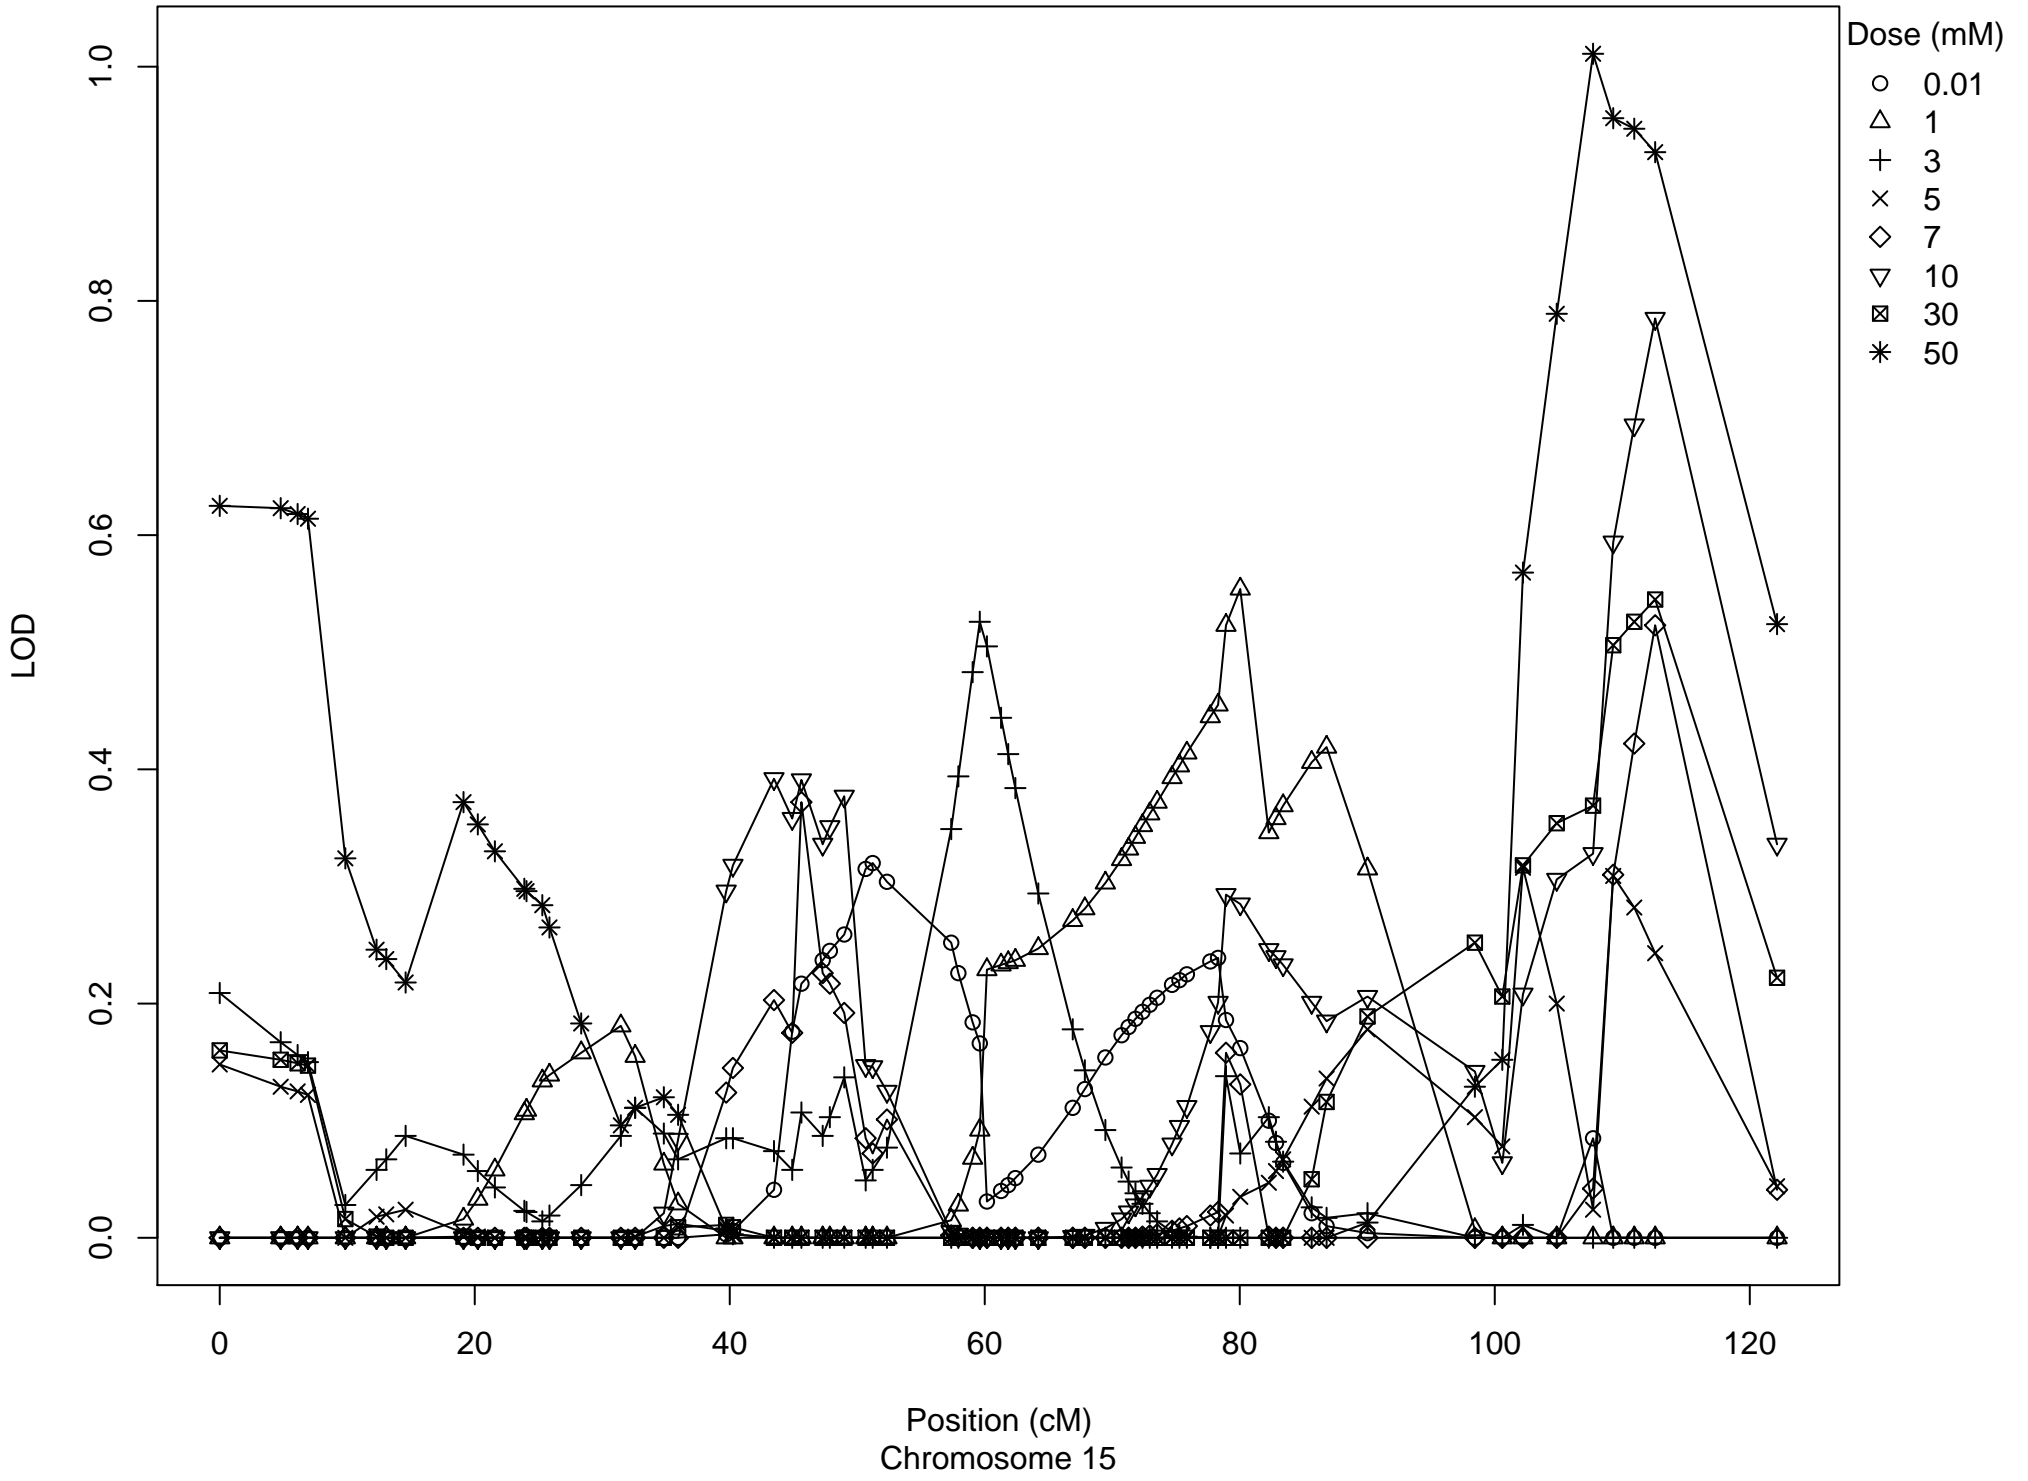

# 86A1 (86A1)

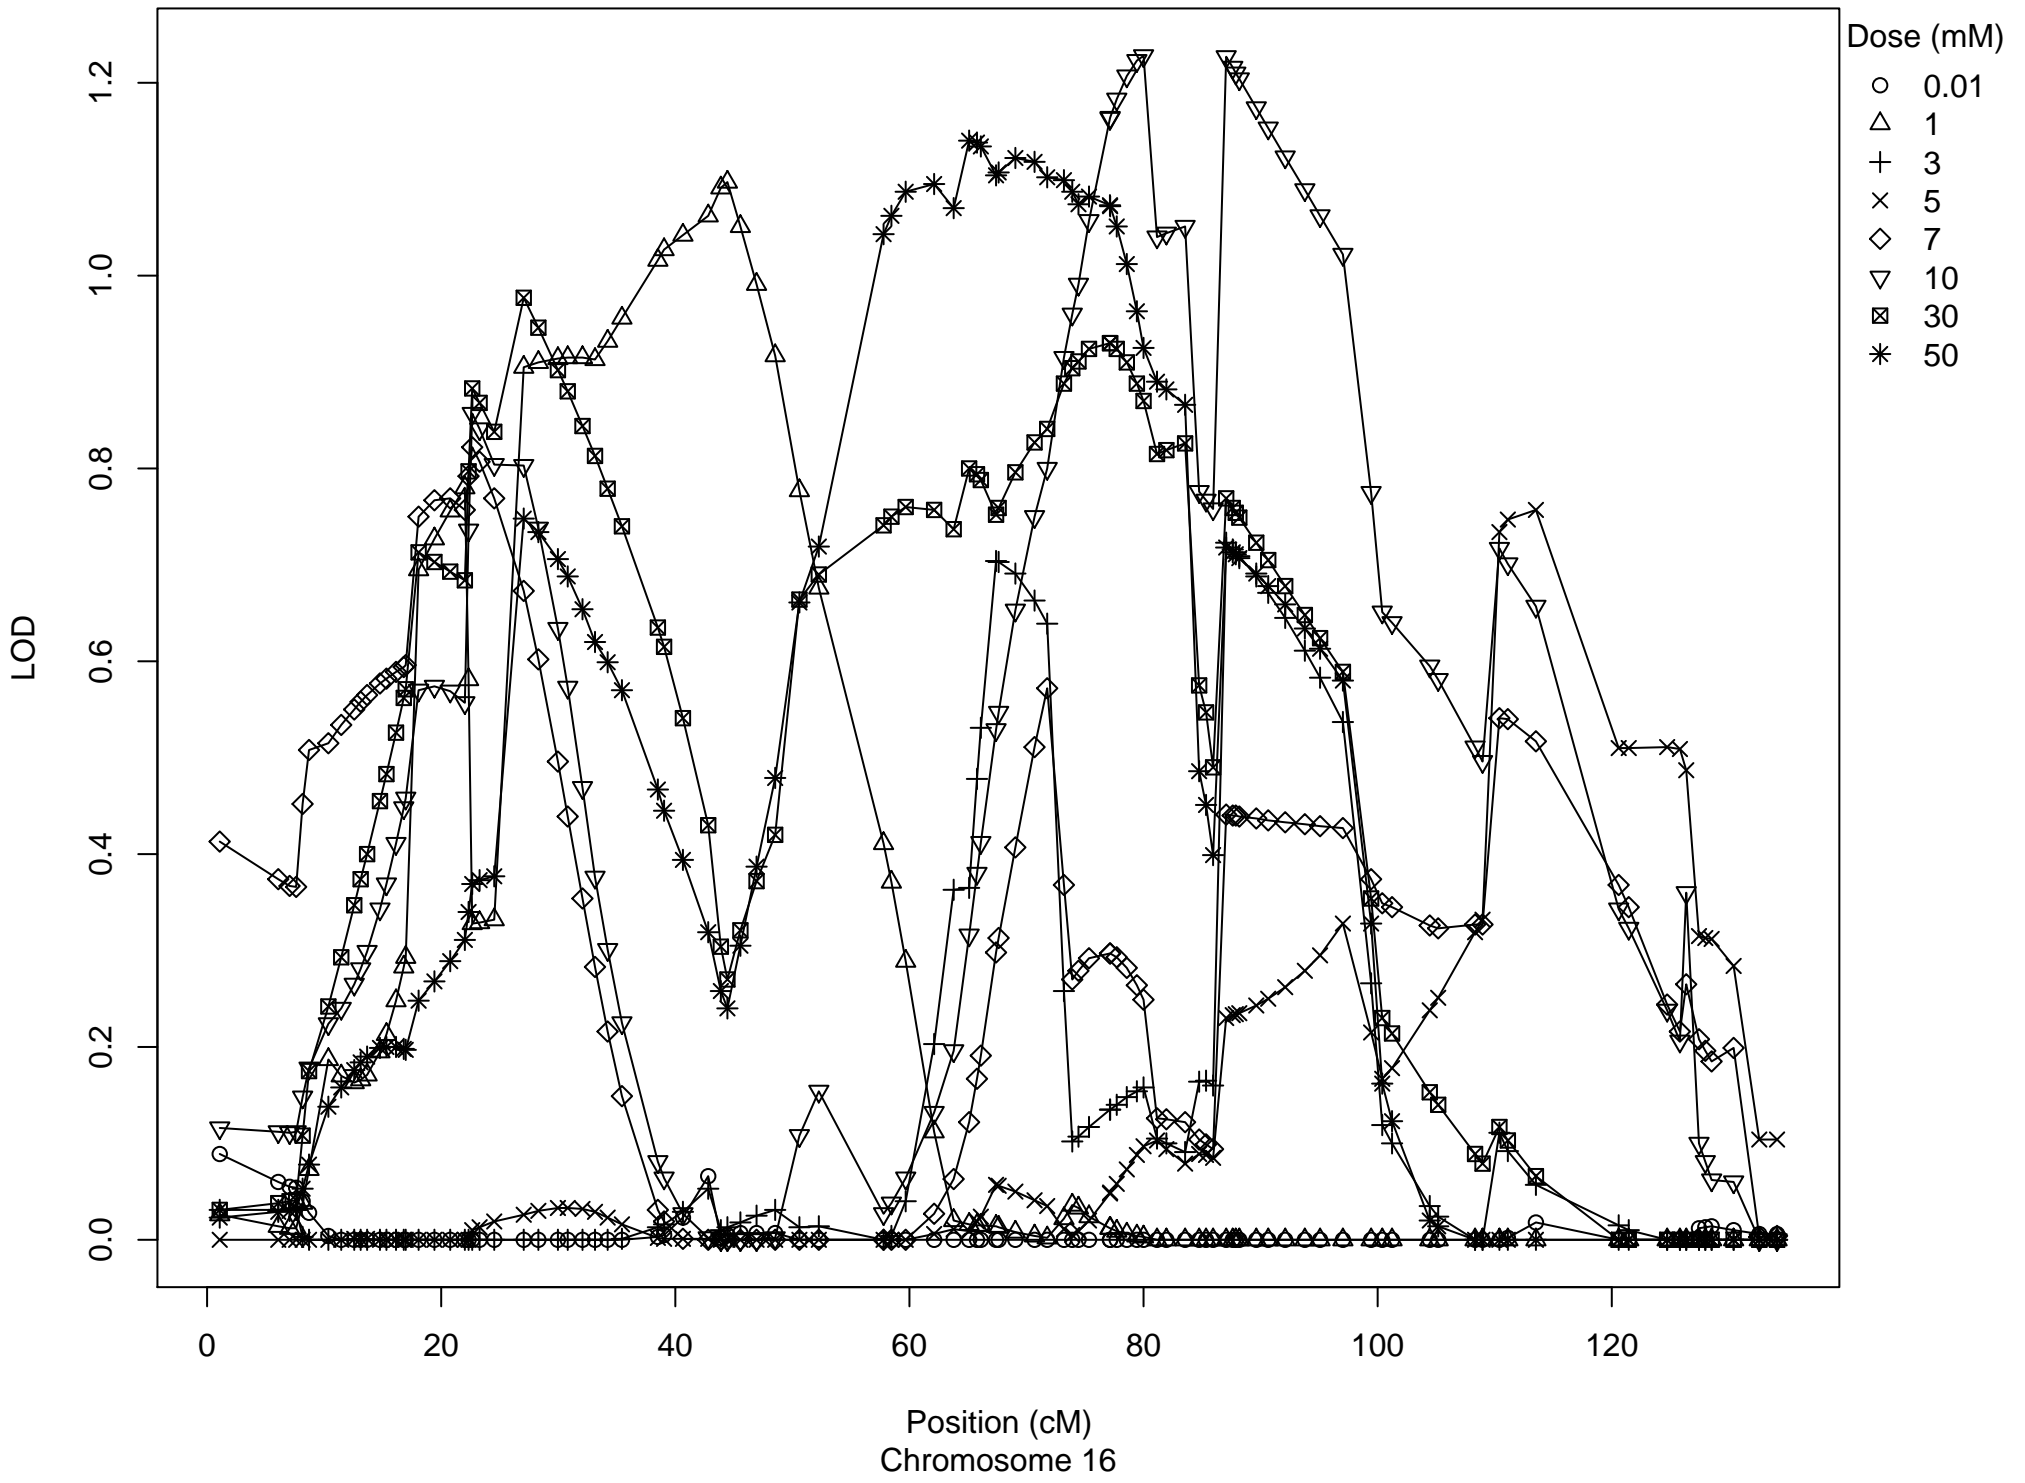

# 86A1 (86A1)

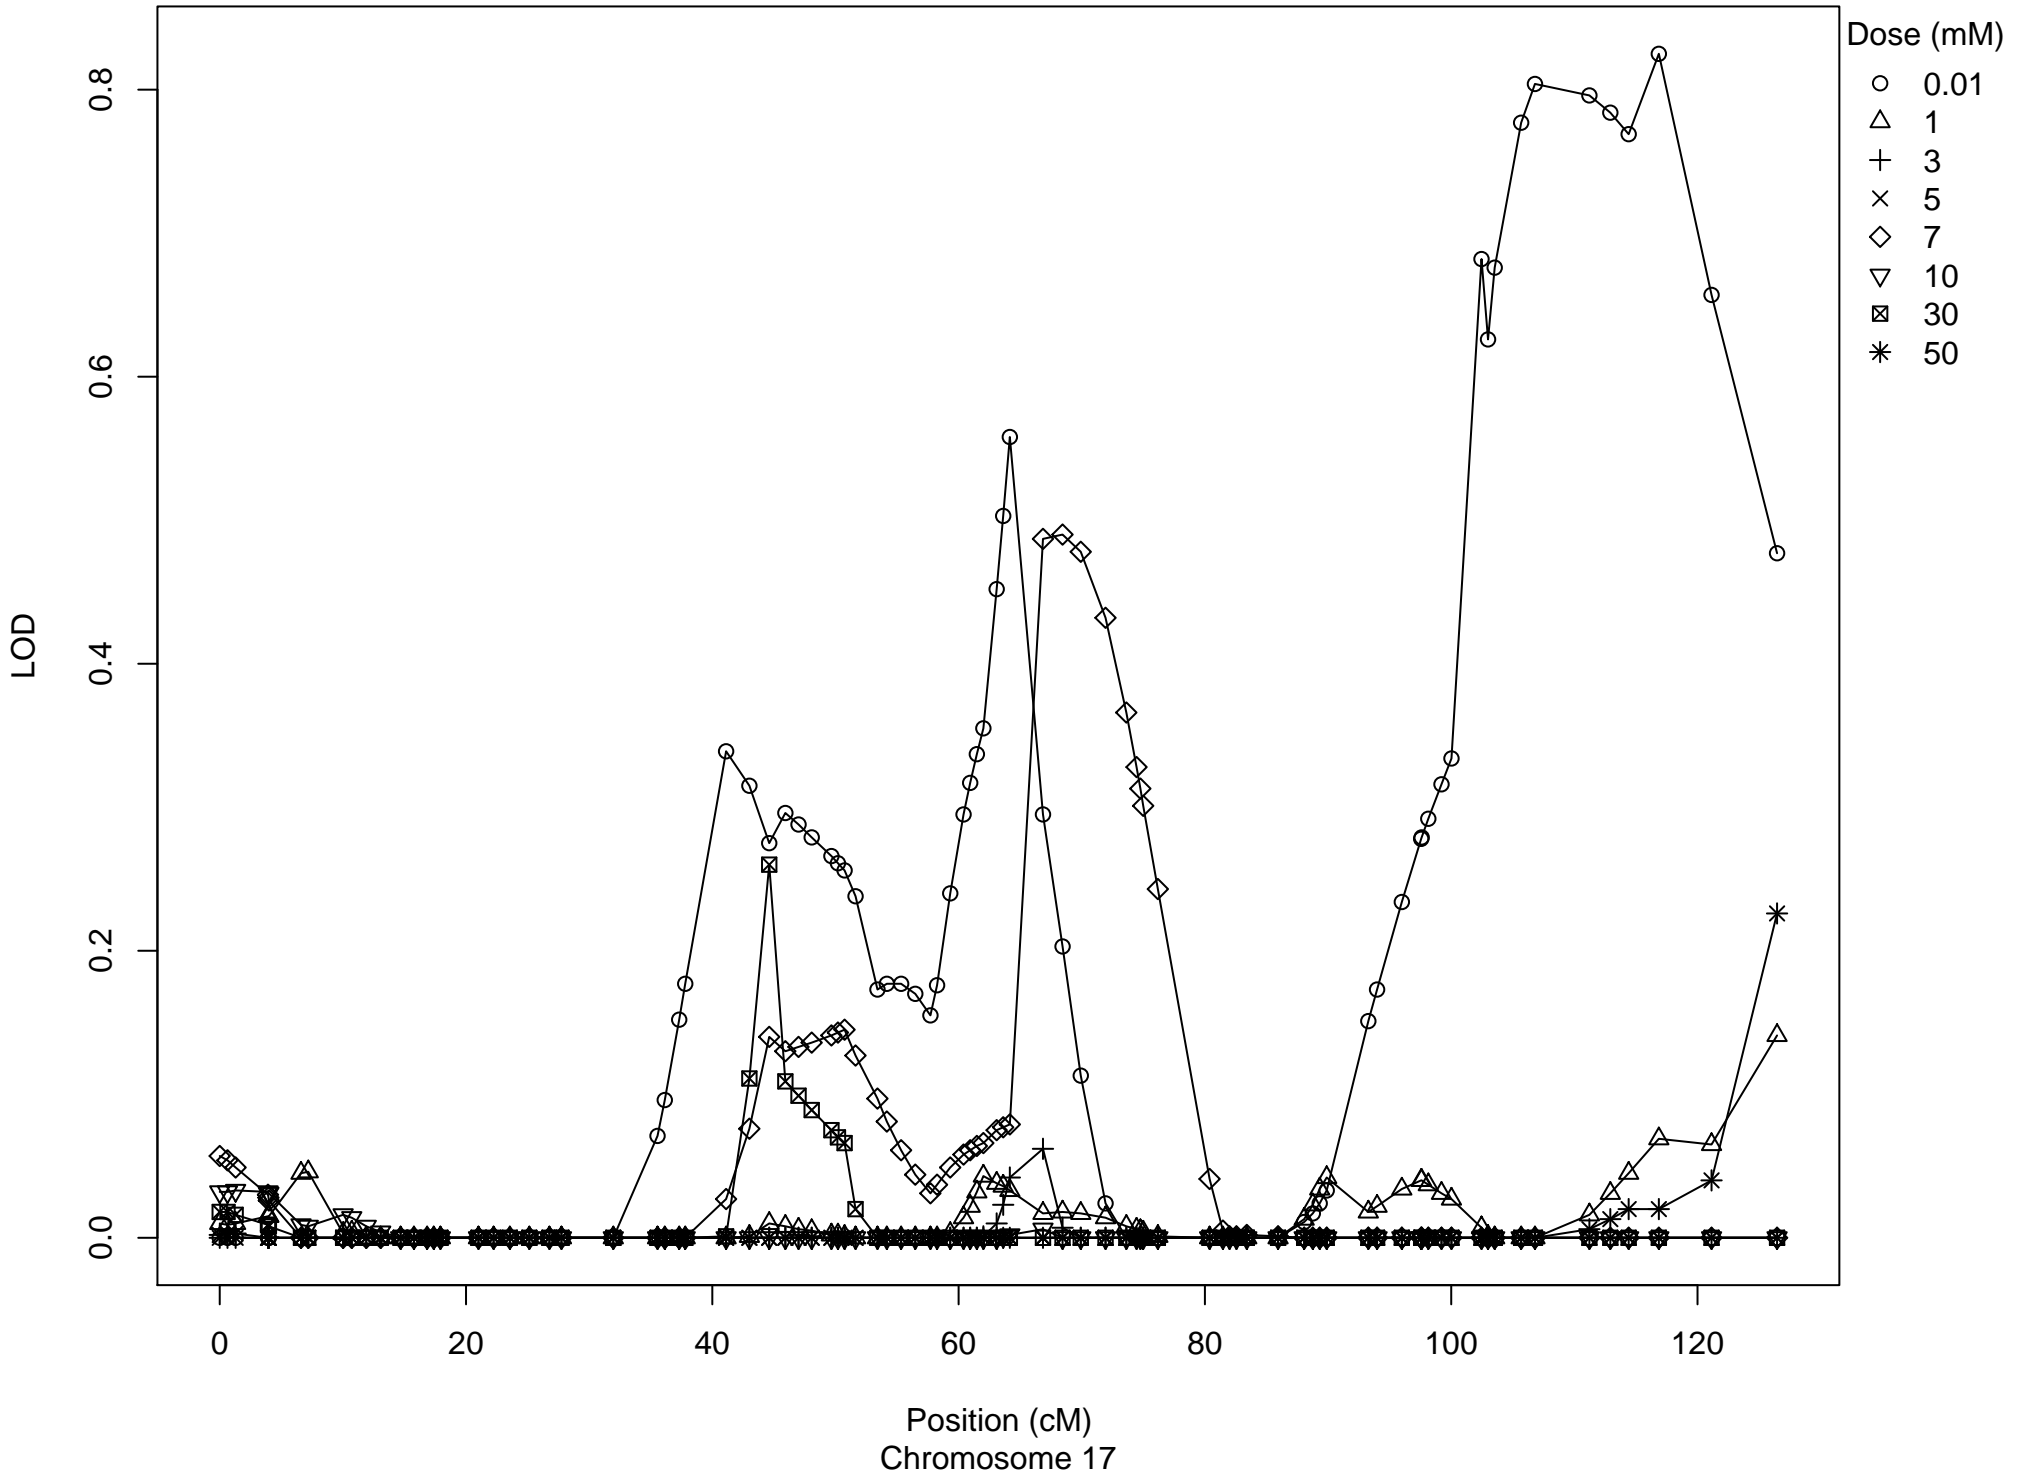



# 86A1 (86A1)

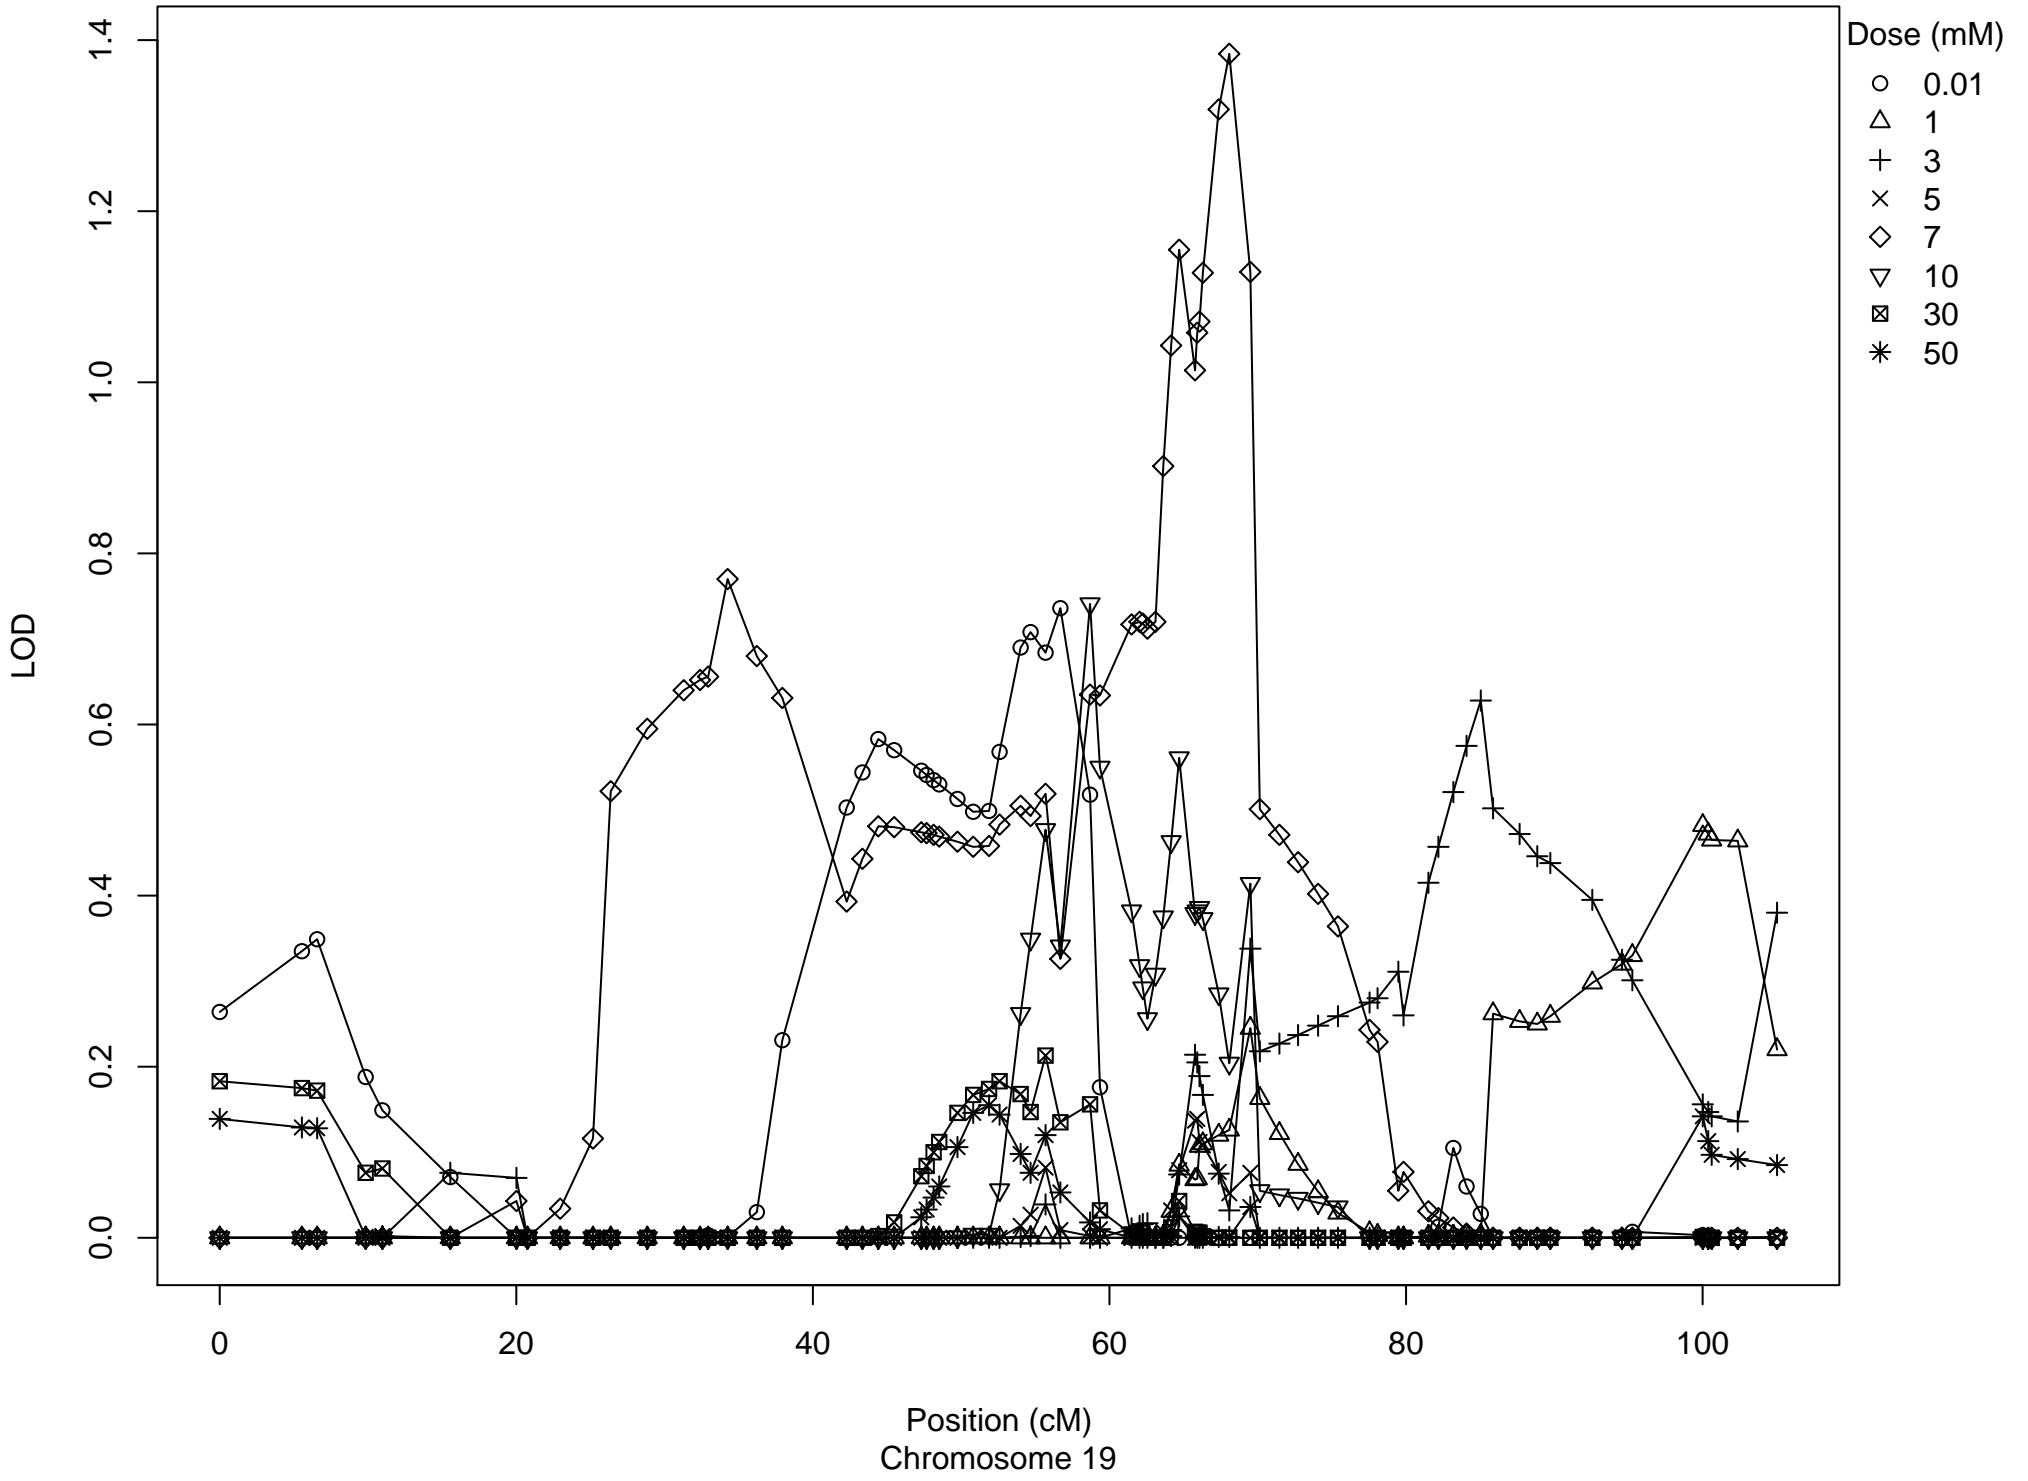

# 86A1 (86A1)

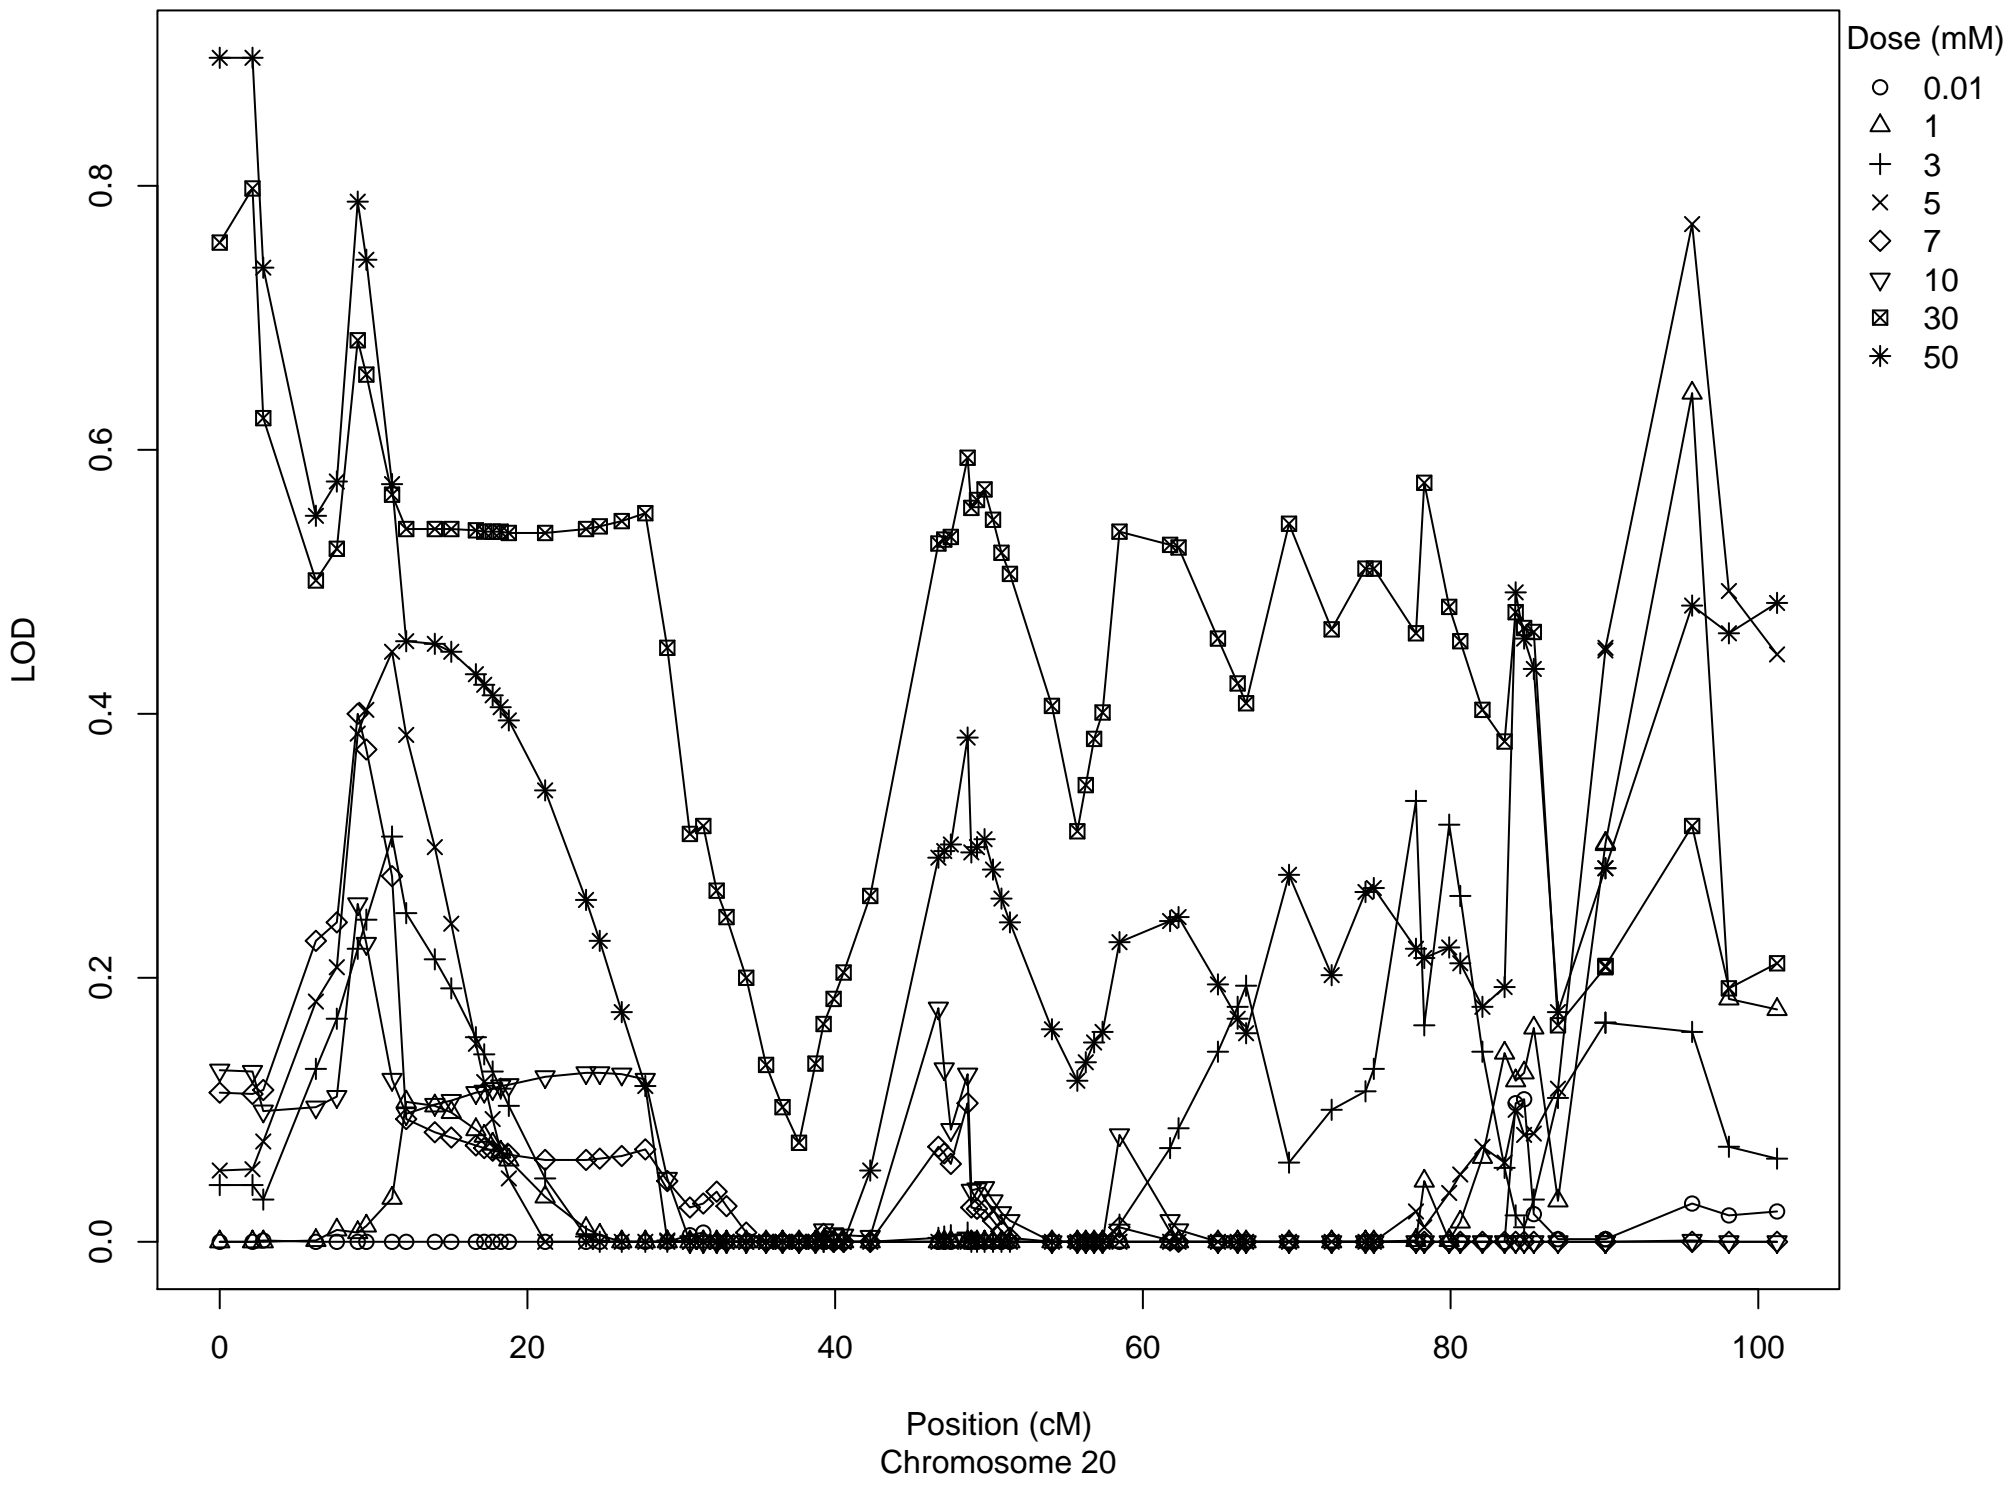

# 86A1 (86A1)

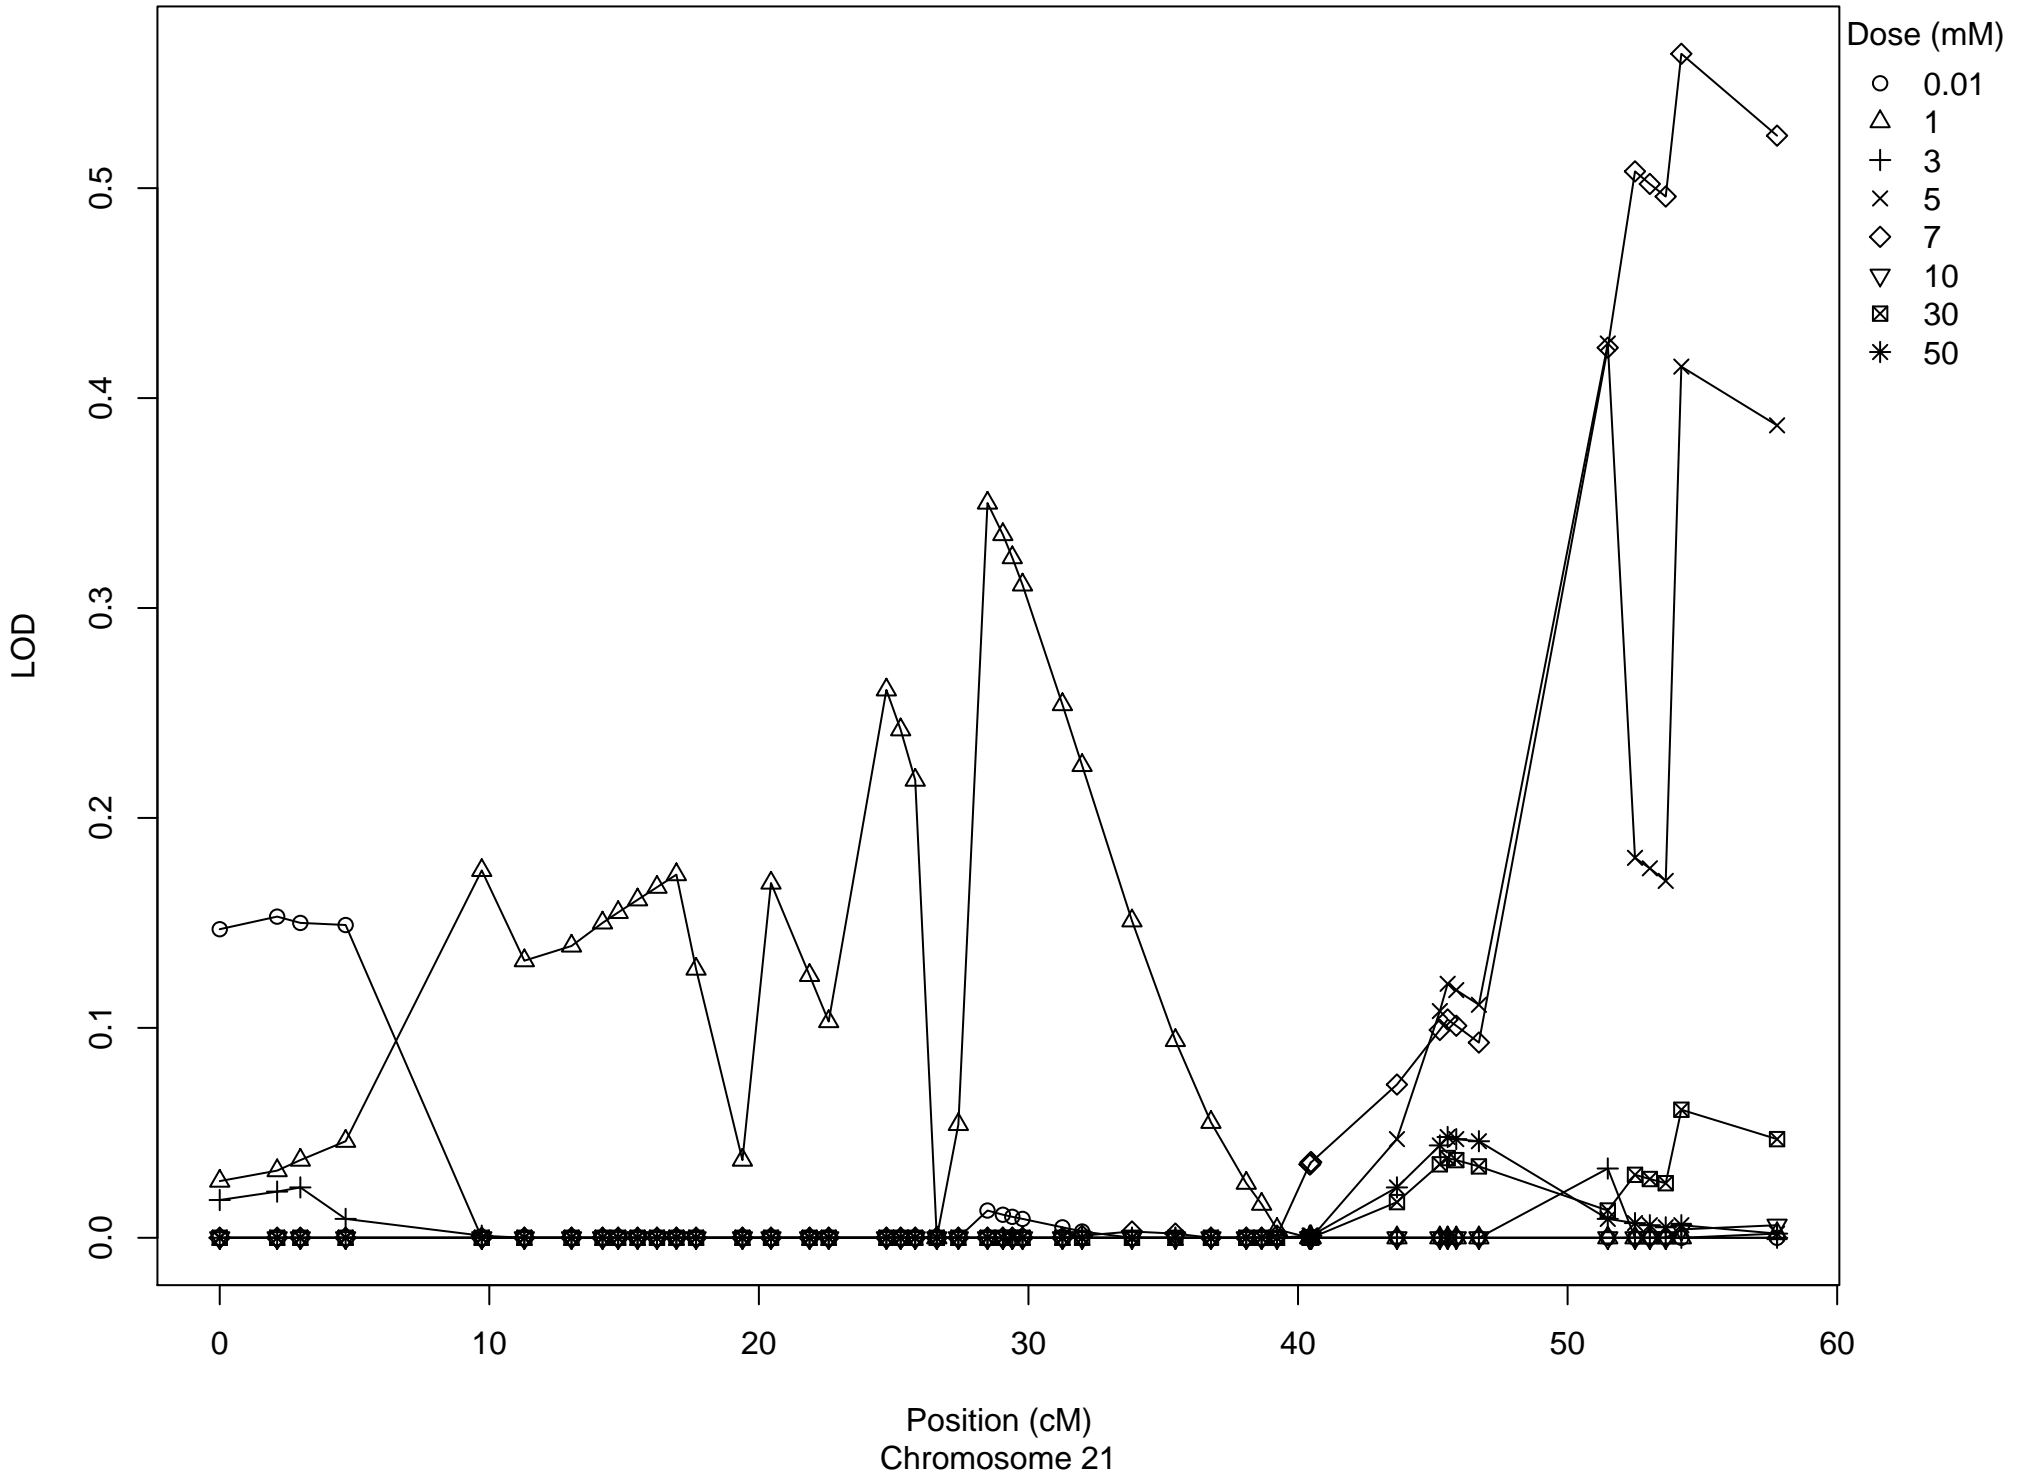

# 86A1 (86A1)

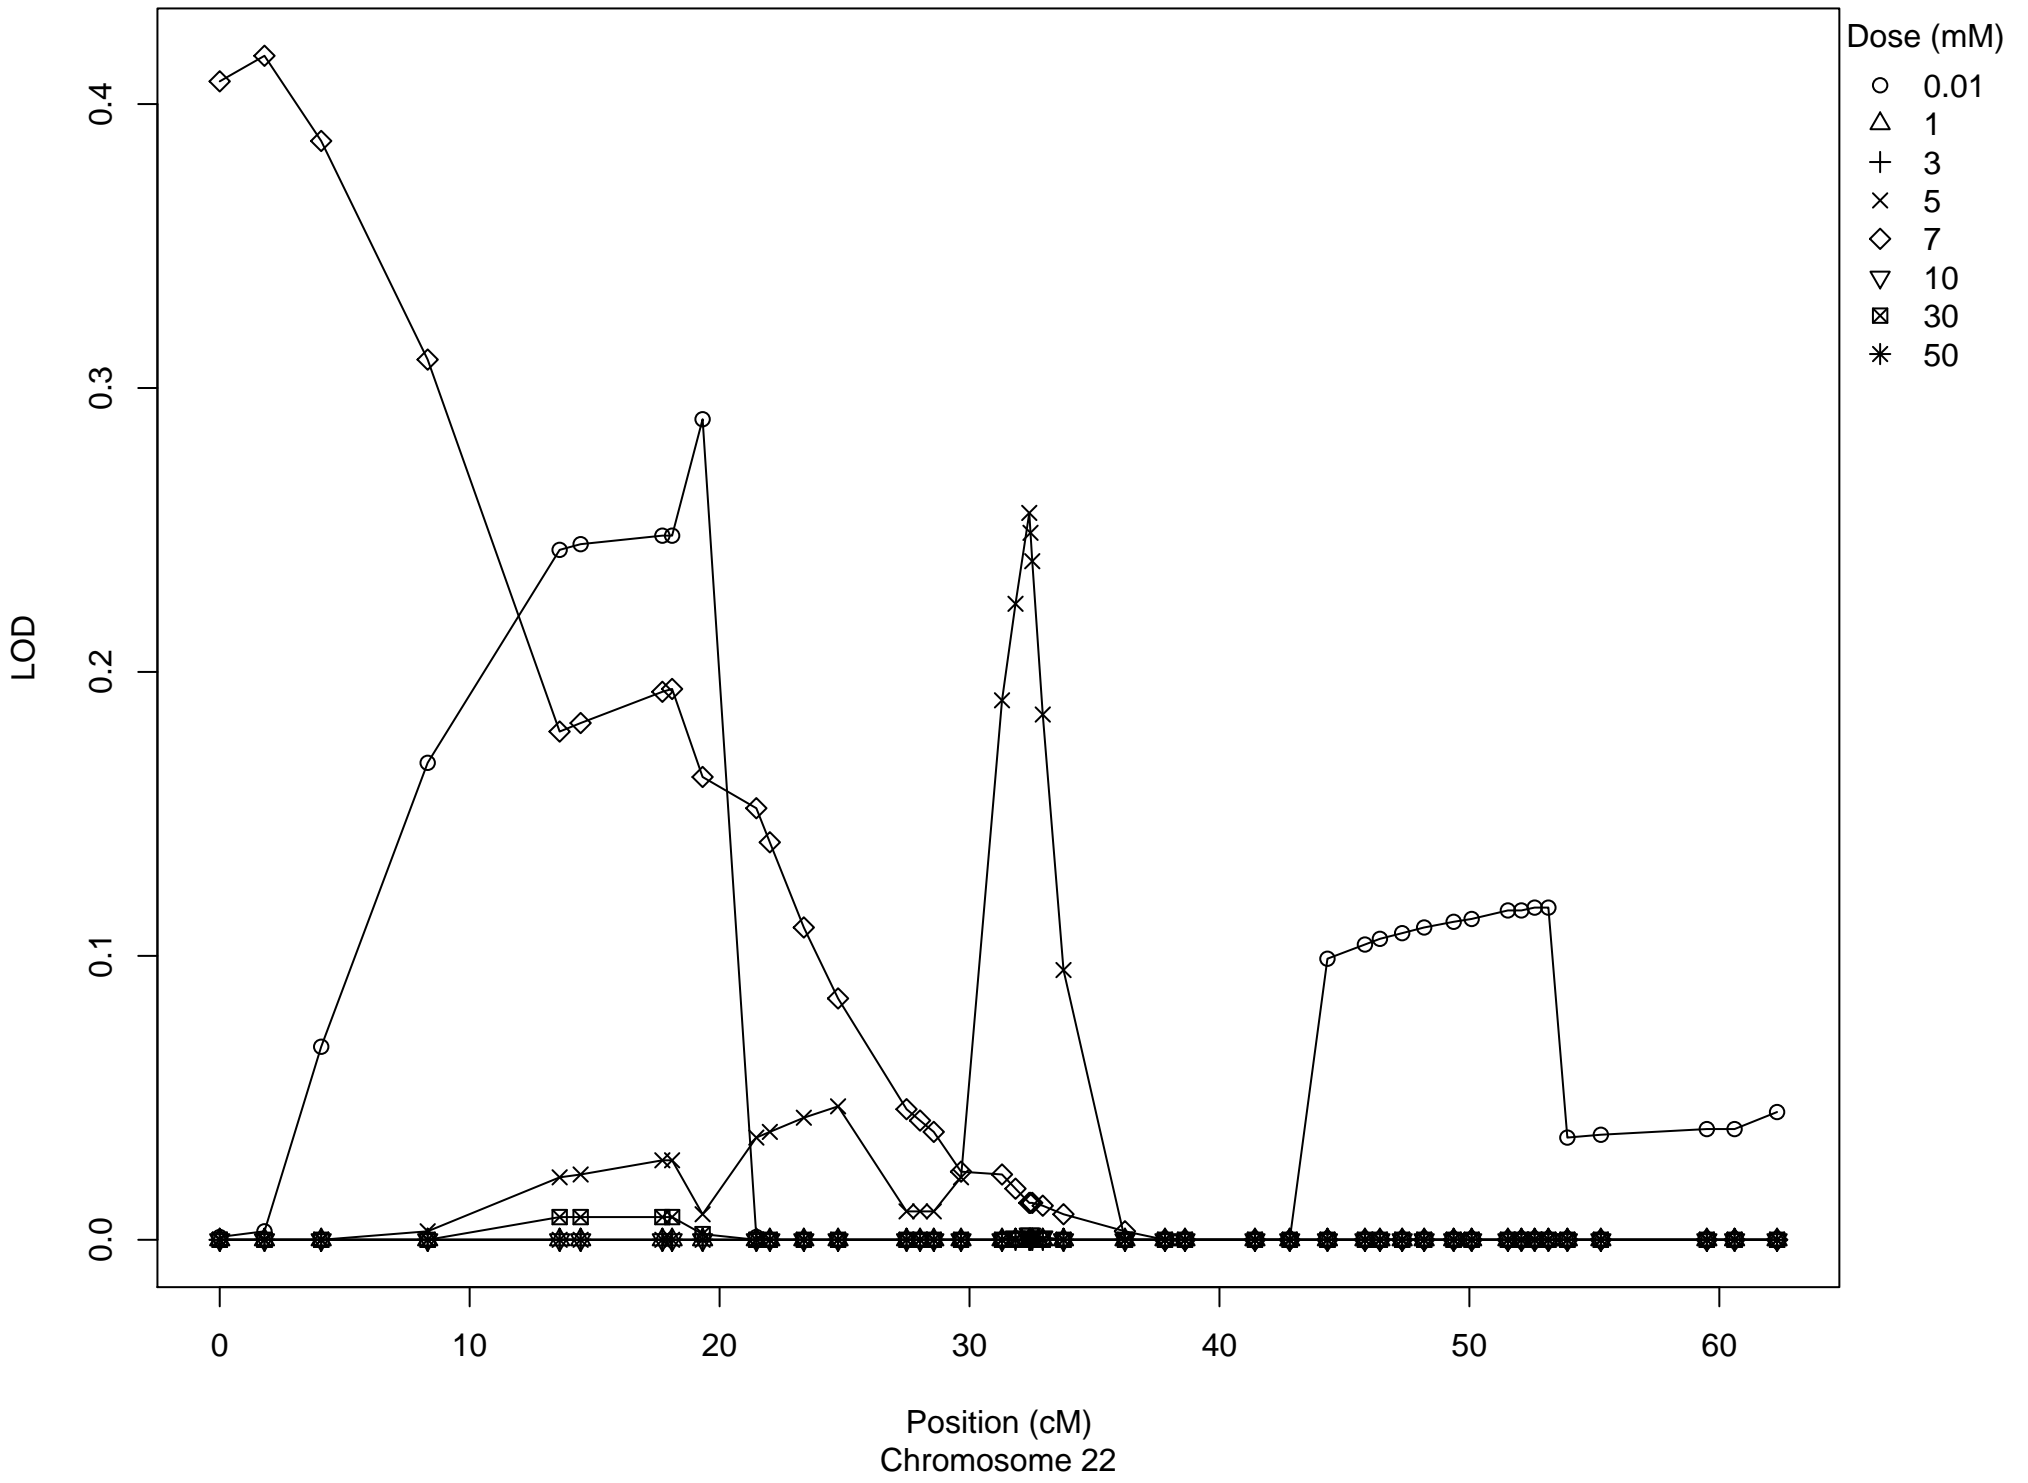



**Supplemental Dataset 4.** LOD score thresholds. Gene dropping permutations were used to identify LOD score thresholds for significant and suggestive linkage. LOD score cut-offs corresponding to a genome-wide p-values less than or equal to .05 for each compound at each concentration were found, and used to define significant LOD score peaks. LOD score cut-offs corresponding to a genome-wide p-values less than or equal to .05 for each drug at each dose were found, and used to define significant LOD score peaks. LOD score cutoffs for suggestive peaks were defined as the minimum LOD score to achieve a p-value of 0.05 at each chromosome for each compound-concentration phenotype. Significant and suggestive peak thresholds for each compound-concentration combination on each chromosome as generated by permutation analysis are listed.

| <b>Drug</b> | <b>Dose (mM)</b> | <b>Chr</b> | <b>Significance threshold</b> | <b>Suggestive threshold</b> |
|-------------|------------------|------------|-------------------------------|-----------------------------|
| Ind1        | 0.001            | 1          | 1.299                         | 0.685                       |
| Ind1        | 0.001            | 2          | 1.236                         | 0.579                       |
| Ind1        | 0.001            | 3          | 1.398                         | 0.572                       |
| Ind1        | 0.001            | 4          | 1.458                         | 0.664                       |
| Ind1        | 0.001            | 5          | 1.657                         | 0.657                       |
| Ind1        | 0.001            | 6          | 1.345                         | 0.69                        |
| Ind1        | 0.001            | 7          | 1.276                         | 0.58                        |
| Ind1        | 0.001            | 8          | 1.28                          | 0.657                       |
| Ind1        | 0.001            | 9          | 1.233                         | 0.627                       |
| Ind1        | 0.001            | 10         | 1.411                         | 0.681                       |
| Ind1        | 0.001            | 11         | 1.214                         | 0.621                       |
| Ind1        | 0.001            | 12         | 1.593                         | 0.733                       |
| Ind1        | 0.001            | 13         | 1.079                         | 0.529                       |
| Ind1        | 0.001            | 14         | 1.448                         | 0.885                       |
| Ind1        | 0.001            | 15         | 1.473                         | 0.529                       |
| Ind1        | 0.001            | 16         | 1.522                         | 0.633                       |
| Ind1        | 0.001            | 17         | 1.496                         | 0.657                       |
| Ind1        | 0.001            | 18         | 1.174                         | 0.53                        |
| Ind1        | 0.001            | 19         | 1.467                         | 0.807                       |
| Ind1        | 0.001            | 20         | 1.34                          | 0.584                       |
| Ind1        | 0.001            | 21         | 0.965                         | 0.404                       |
| Ind1        | 0.001            | 22         | 1.213                         | 0.711                       |
| Ind1        | 0.03             | 1          | 1.181                         | 0.579                       |
| Ind1        | 0.03             | 2          | 1.268                         | 0.596                       |
| Ind1        | 0.03             | 3          | 1.24                          | 0.592                       |
| Ind1        | 0.03             | 4          | 2.074                         | 1.074                       |
| Ind1        | 0.03             | 5          | 1.068                         | 0.571                       |
| Ind1        | 0.03             | 6          | 1.41                          | 0.549                       |
| Ind1        | 0.03             | 7          | 1.264                         | 0.653                       |
| Ind1        | 0.03             | 8          | 1.222                         | 0.529                       |
| Ind1        | 0.03             | 9          | 1.28                          | 0.413                       |
| Ind1        | 0.03             | 10         | 1.157                         | 0.506                       |
| Ind1        | 0.03             | 11         | 1.151                         | 0.564                       |
| Ind1        | 0.03             | 12         | 1.496                         | 0.629                       |
| Ind1        | 0.03             | 13         | 1.939                         | 0.939                       |
| Ind1        | 0.03             | 14         | 1.81                          | 0.81                        |
| Ind1        | 0.03             | 15         | 1.238                         | 0.566                       |
| Ind1        | 0.03             | 16         | 1.388                         | 0.474                       |
| Ind1        | 0.03             | 17         | 1.025                         | 0.457                       |
| Ind1        | 0.03             | 18         | 1.34                          | 0.612                       |
| Ind1        | 0.03             | 19         | 1.208                         | 0.474                       |
| Ind1        | 0.03             | 20         | 1.764                         | 0.764                       |
| Ind1        | 0.03             | 21         | 0.614                         | 0.296                       |
| Ind1        | 0.03             | 22         | 1.28                          | 0.495                       |
| Ind1        | 0.05             | 1          | 1.268                         | 0.599                       |
| Ind1        | 0.05             | 2          | 1.264                         | 0.465                       |
| Ind1        | 0.05             | 3          | 1.357                         | 0.632                       |
| Ind1        | 0.05             | 4          | 1.745                         | 0.745                       |
| Ind1        | 0.05             | 5          | 1.322                         | 0.546                       |
| Ind1        | 0.05             | 6          | 1.467                         | 0.582                       |

| <b>Drug</b> | <b>Dose (mM)</b> | <b>Chr</b> | <b>Significance threshold</b> | <b>Suggestive threshold</b> |
|-------------|------------------|------------|-------------------------------|-----------------------------|
| Ind1        | 0.05             | 7          | 1.539                         | 0.754                       |
| Ind1        | 0.05             | 8          | 1.692                         | 0.906                       |
| Ind1        | 0.05             | 9          | 1.347                         | 0.682                       |
| Ind1        | 0.05             | 10         | 1.218                         | 0.608                       |
| Ind1        | 0.05             | 11         | 1.374                         | 0.466                       |
| Ind1        | 0.05             | 12         | 1.484                         | 0.734                       |
| Ind1        | 0.05             | 13         | 1.254                         | 0.523                       |
| Ind1        | 0.05             | 14         | 1.518                         | 0.731                       |
| Ind1        | 0.05             | 15         | 1.513                         | 0.625                       |
| Ind1        | 0.05             | 16         | 1.606                         | 0.606                       |
| Ind1        | 0.05             | 17         | 1.222                         | 0.494                       |
| Ind1        | 0.05             | 18         | 1.761                         | 0.761                       |
| Ind1        | 0.05             | 19         | 1.634                         | 0.728                       |
| Ind1        | 0.05             | 20         | 1.508                         | 0.788                       |
| Ind1        | 0.05             | 21         | 2.163                         | 1.163                       |
| Ind1        | 0.05             | 22         | 1.073                         | 0.533                       |
| Ind1        | 0.1              | 1          | 1.386                         | 0.624                       |
| Ind1        | 0.1              | 2          | 1.444                         | 0.604                       |
| Ind1        | 0.1              | 3          | 1.159                         | 0.471                       |
| Ind1        | 0.1              | 4          | 1.161                         | 0.522                       |
| Ind1        | 0.1              | 5          | 0.998                         | 0.44                        |
| Ind1        | 0.1              | 6          | 1.278                         | 0.619                       |
| Ind1        | 0.1              | 7          | 1.774                         | 0.774                       |
| Ind1        | 0.1              | 8          | 1.419                         | 0.556                       |
| Ind1        | 0.1              | 9          | 1.121                         | 0.572                       |
| Ind1        | 0.1              | 10         | 1.252                         | 0.718                       |
| Ind1        | 0.1              | 11         | 1.169                         | 0.434                       |
| Ind1        | 0.1              | 12         | 1.345                         | 0.697                       |
| Ind1        | 0.1              | 13         | 1.025                         | 0.519                       |
| Ind1        | 0.1              | 14         | 1.3                           | 0.553                       |
| Ind1        | 0.1              | 15         | 1.288                         | 0.532                       |
| Ind1        | 0.1              | 16         | 1.201                         | 0.541                       |
| Ind1        | 0.1              | 17         | 1.078                         | 0.495                       |
| Ind1        | 0.1              | 18         | 1.23                          | 0.531                       |
| Ind1        | 0.1              | 19         | 1.439                         | 0.582                       |
| Ind1        | 0.1              | 20         | 1.473                         | 0.714                       |
| Ind1        | 0.1              | 21         | 0.97                          | 0.485                       |
| Ind1        | 0.1              | 22         | 1.167                         | 0.612                       |
| Ind1        | 0.2              | 1          | 1.265                         | 0.537                       |
| Ind1        | 0.2              | 2          | 1.089                         | 0.576                       |
| Ind1        | 0.2              | 3          | 1.172                         | 0.514                       |
| Ind1        | 0.2              | 4          | 1.124                         | 0.413                       |
| Ind1        | 0.2              | 5          | 1.033                         | 0.518                       |
| Ind1        | 0.2              | 6          | 1.046                         | 0.556                       |
| Ind1        | 0.2              | 7          | 1.344                         | 0.618                       |
| Ind1        | 0.2              | 8          | 1.018                         | 0.543                       |
| Ind1        | 0.2              | 9          | 1.095                         | 0.563                       |
| Ind1        | 0.2              | 10         | 1.221                         | 0.636                       |
| Ind1        | 0.2              | 11         | 1.301                         | 0.531                       |
| Ind1        | 0.2              | 12         | 1.213                         | 0.724                       |

| <b>Drug</b> | <b>Dose (mM)</b> | <b>Chr</b> | <b>Significance threshold</b> | <b>Suggestive threshold</b> |
|-------------|------------------|------------|-------------------------------|-----------------------------|
| Ind1        | 0.2              | 13         | 0.983                         | 0.572                       |
| Ind1        | 0.2              | 14         | 0.95                          | 0.427                       |
| Ind1        | 0.2              | 15         | 1.116                         | 0.319                       |
| Ind1        | 0.2              | 16         | 0.789                         | 0.437                       |
| Ind1        | 0.2              | 17         | 1.078                         | 0.5                         |
| Ind1        | 0.2              | 18         | 0.931                         | 0.468                       |
| Ind1        | 0.2              | 19         | 1.534                         | 0.534                       |
| Ind1        | 0.2              | 20         | 1.44                          | 0.492                       |
| Ind1        | 0.2              | 21         | 1.178                         | 0.512                       |
| Ind1        | 0.2              | 22         | 0.972                         | 0.472                       |
| Ind1        | 0.3              | 1          | 1.357                         | 0.632                       |
| Ind1        | 0.3              | 2          | 1.247                         | 0.532                       |
| Ind1        | 0.3              | 3          | 1.539                         | 0.619                       |
| Ind1        | 0.3              | 4          | 1.383                         | 0.634                       |
| Ind1        | 0.3              | 5          | 1.332                         | 0.522                       |
| Ind1        | 0.3              | 6          | 1.546                         | 0.694                       |
| Ind1        | 0.3              | 7          | 1.287                         | 0.682                       |
| Ind1        | 0.3              | 8          | 1.248                         | 0.604                       |
| Ind1        | 0.3              | 9          | 1.243                         | 0.65                        |
| Ind1        | 0.3              | 10         | 1.659                         | 0.667                       |
| Ind1        | 0.3              | 11         | 1.527                         | 0.577                       |
| Ind1        | 0.3              | 12         | 1.348                         | 0.699                       |
| Ind1        | 0.3              | 13         | 1.178                         | 0.601                       |
| Ind1        | 0.3              | 14         | 1.239                         | 0.462                       |
| Ind1        | 0.3              | 15         | 1.443                         | 0.56                        |
| Ind1        | 0.3              | 16         | 0.994                         | 0.416                       |
| Ind1        | 0.3              | 17         | 1.541                         | 0.72                        |
| Ind1        | 0.3              | 18         | 1.394                         | 0.653                       |
| Ind1        | 0.3              | 19         | 1.667                         | 0.737                       |
| Ind1        | 0.3              | 20         | 1.337                         | 0.543                       |
| Ind1        | 0.3              | 21         | 0.988                         | 0.56                        |
| Ind1        | 0.3              | 22         | 1.296                         | 0.742                       |
| Ind1        | 0.5              | 1          | 0.878                         | 0.538                       |
| Ind1        | 0.5              | 2          | 0.967                         | 0.436                       |
| Ind1        | 0.5              | 3          | 1.165                         | 0.515                       |
| Ind1        | 0.5              | 4          | 1.041                         | 0.459                       |
| Ind1        | 0.5              | 5          | 1.129                         | 0.504                       |
| Ind1        | 0.5              | 6          | 0.962                         | 0.52                        |
| Ind1        | 0.5              | 7          | 1.268                         | 0.638                       |
| Ind1        | 0.5              | 8          | 1.136                         | 0.52                        |
| Ind1        | 0.5              | 9          | 1.014                         | 0.434                       |
| Ind1        | 0.5              | 10         | 1.161                         | 0.666                       |
| Ind1        | 0.5              | 11         | 1.593                         | 0.593                       |
| Ind1        | 0.5              | 12         | 1.226                         | 0.513                       |
| Ind1        | 0.5              | 13         | 0.949                         | 0.428                       |
| Ind1        | 0.5              | 14         | 0.991                         | 0.444                       |
| Ind1        | 0.5              | 15         | 1.151                         | 0.567                       |
| Ind1        | 0.5              | 16         | 0.824                         | 0.409                       |
| Ind1        | 0.5              | 17         | 1.184                         | 0.452                       |
| Ind1        | 0.5              | 18         | 0.984                         | 0.53                        |

| <b>Drug</b> | <b>Dose (mM)</b> | <b>Chr</b> | <b>Significance threshold</b> | <b>Suggestive threshold</b> |
|-------------|------------------|------------|-------------------------------|-----------------------------|
| Ind1        | 0.5              | 19         | 1.236                         | 0.618                       |
| Ind1        | 0.5              | 20         | 1.337                         | 0.545                       |
| Ind1        | 0.5              | 21         | 1.059                         | 0.491                       |
| Ind1        | 0.5              | 22         | 1.109                         | 0.563                       |
| Ind1        | 3                | 1          | 1.405                         | 0.638                       |
| Ind1        | 3                | 2          | 1.626                         | 0.626                       |
| Ind1        | 3                | 3          | 1.994                         | 0.994                       |
| Ind1        | 3                | 4          | 1.309                         | 0.574                       |
| Ind1        | 3                | 5          | 1.604                         | 0.604                       |
| Ind1        | 3                | 6          | 1.998                         | 0.998                       |
| Ind1        | 3                | 7          | 1.612                         | 0.612                       |
| Ind1        | 3                | 8          | 1.418                         | 0.454                       |
| Ind1        | 3                | 9          | 1.733                         | 0.733                       |
| Ind1        | 3                | 10         | 1.5                           | 0.617                       |
| Ind1        | 3                | 11         | 1.353                         | 0.52                        |
| Ind1        | 3                | 12         | 1.378                         | 0.584                       |
| Ind1        | 3                | 13         | 2.208                         | 1.208                       |
| Ind1        | 3                | 14         | 1.392                         | 0.61                        |
| Ind1        | 3                | 15         | 1.468                         | 0.611                       |
| Ind1        | 3                | 16         | 1.386                         | 0.517                       |
| Ind1        | 3                | 17         | 1.54                          | 0.594                       |
| Ind1        | 3                | 18         | 1.68                          | 0.75                        |
| Ind1        | 3                | 19         | 1.444                         | 0.45                        |
| Ind1        | 3                | 20         | 1.607                         | 0.686                       |
| Ind1        | 3                | 21         | 1.409                         | 0.676                       |
| Ind1        | 3                | 22         | 1.523                         | 0.523                       |
| Ind2        | 0.01             | 1          | 1.09                          | 0.609                       |
| Ind2        | 0.01             | 2          | 1.318                         | 0.525                       |
| Ind2        | 0.01             | 3          | 1.396                         | 0.619                       |
| Ind2        | 0.01             | 4          | 1.147                         | 0.623                       |
| Ind2        | 0.01             | 5          | 1.33                          | 0.487                       |
| Ind2        | 0.01             | 6          | 1.151                         | 0.61                        |
| Ind2        | 0.01             | 7          | 1.162                         | 0.669                       |
| Ind2        | 0.01             | 8          | 1.33                          | 0.738                       |
| Ind2        | 0.01             | 9          | 1.169                         | 0.59                        |
| Ind2        | 0.01             | 10         | 1.252                         | 0.596                       |
| Ind2        | 0.01             | 11         | 1.1                           | 0.552                       |
| Ind2        | 0.01             | 12         | 1.397                         | 0.583                       |
| Ind2        | 0.01             | 13         | 1.137                         | 0.724                       |
| Ind2        | 0.01             | 14         | 1.354                         | 0.586                       |
| Ind2        | 0.01             | 15         | 1.272                         | 0.71                        |
| Ind2        | 0.01             | 16         | 1.139                         | 0.446                       |
| Ind2        | 0.01             | 17         | 1.233                         | 0.522                       |
| Ind2        | 0.01             | 18         | 1.474                         | 0.732                       |
| Ind2        | 0.01             | 19         | 1.382                         | 0.626                       |
| Ind2        | 0.01             | 20         | 1.71                          | 0.71                        |
| Ind2        | 0.01             | 21         | 1.027                         | 0.592                       |
| Ind2        | 0.01             | 22         | 1.116                         | 0.557                       |
| Ind2        | 0.16             | 1          | 1.415                         | 0.657                       |
| Ind2        | 0.16             | 2          | 1.388                         | 0.563                       |

| <b>Drug</b> | <b>Dose (mM)</b> | <b>Chr</b> | <b>Significance threshold</b> | <b>Suggestive threshold</b> |
|-------------|------------------|------------|-------------------------------|-----------------------------|
| Ind2        | 0.16             | 3          | 1.337                         | 0.588                       |
| Ind2        | 0.16             | 4          | 1.484                         | 0.701                       |
| Ind2        | 0.16             | 5          | 1.168                         | 0.48                        |
| Ind2        | 0.16             | 6          | 1.132                         | 0.578                       |
| Ind2        | 0.16             | 7          | 1.082                         | 0.594                       |
| Ind2        | 0.16             | 8          | 1.356                         | 0.551                       |
| Ind2        | 0.16             | 9          | 1.177                         | 0.571                       |
| Ind2        | 0.16             | 10         | 1.502                         | 0.685                       |
| Ind2        | 0.16             | 11         | 1.278                         | 0.611                       |
| Ind2        | 0.16             | 12         | 1.556                         | 0.6                         |
| Ind2        | 0.16             | 13         | 1.287                         | 0.495                       |
| Ind2        | 0.16             | 14         | 1.209                         | 0.481                       |
| Ind2        | 0.16             | 15         | 1.237                         | 0.602                       |
| Ind2        | 0.16             | 16         | 1.193                         | 0.431                       |
| Ind2        | 0.16             | 17         | 0.996                         | 0.456                       |
| Ind2        | 0.16             | 18         | 1.283                         | 0.63                        |
| Ind2        | 0.16             | 19         | 1.231                         | 0.56                        |
| Ind2        | 0.16             | 20         | 1.401                         | 0.743                       |
| Ind2        | 0.16             | 21         | 1.286                         | 0.553                       |
| Ind2        | 0.16             | 22         | 1.045                         | 0.585                       |
| Ind2        | 0.23             | 1          | 0.94                          | 0.482                       |
| Ind2        | 0.23             | 2          | 1.159                         | 0.518                       |
| Ind2        | 0.23             | 3          | 1.039                         | 0.512                       |
| Ind2        | 0.23             | 4          | 1.146                         | 0.569                       |
| Ind2        | 0.23             | 5          | 1.064                         | 0.51                        |
| Ind2        | 0.23             | 6          | 1.059                         | 0.44                        |
| Ind2        | 0.23             | 7          | 1.243                         | 0.634                       |
| Ind2        | 0.23             | 8          | 0.981                         | 0.499                       |
| Ind2        | 0.23             | 9          | 0.988                         | 0.596                       |
| Ind2        | 0.23             | 10         | 1.432                         | 0.46                        |
| Ind2        | 0.23             | 11         | 0.823                         | 0.431                       |
| Ind2        | 0.23             | 12         | 1.268                         | 0.631                       |
| Ind2        | 0.23             | 13         | 1.153                         | 0.622                       |
| Ind2        | 0.23             | 14         | 0.992                         | 0.449                       |
| Ind2        | 0.23             | 15         | 0.951                         | 0.536                       |
| Ind2        | 0.23             | 16         | 0.942                         | 0.459                       |
| Ind2        | 0.23             | 17         | 1.204                         | 0.583                       |
| Ind2        | 0.23             | 18         | 1.257                         | 0.661                       |
| Ind2        | 0.23             | 19         | 1.048                         | 0.556                       |
| Ind2        | 0.23             | 20         | 0.919                         | 0.567                       |
| Ind2        | 0.23             | 21         | 0.581                         | 0.294                       |
| Ind2        | 0.23             | 22         | 1.138                         | 0.51                        |
| Ind2        | 0.5              | 1          | 1.007                         | 0.495                       |
| Ind2        | 0.5              | 2          | 1.149                         | 0.551                       |
| Ind2        | 0.5              | 3          | 1.049                         | 0.535                       |
| Ind2        | 0.5              | 4          | 0.936                         | 0.455                       |
| Ind2        | 0.5              | 5          | 1.174                         | 0.547                       |
| Ind2        | 0.5              | 6          | 1.096                         | 0.558                       |
| Ind2        | 0.5              | 7          | 1.094                         | 0.623                       |
| Ind2        | 0.5              | 8          | 1.163                         | 0.5                         |

| <b>Drug</b> | <b>Dose (mM)</b> | <b>Chr</b> | <b>Significance threshold</b> | <b>Suggestive threshold</b> |
|-------------|------------------|------------|-------------------------------|-----------------------------|
| Ind2        | 0.5              | 9          | 1.317                         | 0.546                       |
| Ind2        | 0.5              | 10         | 1.129                         | 0.64                        |
| Ind2        | 0.5              | 11         | 1.112                         | 0.567                       |
| Ind2        | 0.5              | 12         | 1.235                         | 0.579                       |
| Ind2        | 0.5              | 13         | 1.129                         | 0.489                       |
| Ind2        | 0.5              | 14         | 1.27                          | 0.56                        |
| Ind2        | 0.5              | 15         | 1.226                         | 0.543                       |
| Ind2        | 0.5              | 16         | 1.53                          | 0.742                       |
| Ind2        | 0.5              | 17         | 1.005                         | 0.402                       |
| Ind2        | 0.5              | 18         | 1.218                         | 0.542                       |
| Ind2        | 0.5              | 19         | 1.123                         | 0.661                       |
| Ind2        | 0.5              | 20         | 0.921                         | 0.529                       |
| Ind2        | 0.5              | 21         | 1.031                         | 0.697                       |
| Ind2        | 0.5              | 22         | 1.101                         | 0.651                       |
| Ind2        | 1                | 1          | 1.328                         | 0.6                         |
| Ind2        | 1                | 2          | 1.627                         | 0.655                       |
| Ind2        | 1                | 3          | 1.517                         | 0.647                       |
| Ind2        | 1                | 4          | 1.257                         | 0.676                       |
| Ind2        | 1                | 5          | 1.8                           | 0.8                         |
| Ind2        | 1                | 6          | 1.495                         | 0.717                       |
| Ind2        | 1                | 7          | 1.412                         | 0.746                       |
| Ind2        | 1                | 8          | 1.336                         | 0.595                       |
| Ind2        | 1                | 9          | 1.151                         | 0.443                       |
| Ind2        | 1                | 10         | 1.702                         | 0.702                       |
| Ind2        | 1                | 11         | 1.496                         | 0.574                       |
| Ind2        | 1                | 12         | 1.709                         | 0.727                       |
| Ind2        | 1                | 13         | 1.718                         | 0.729                       |
| Ind2        | 1                | 14         | 1.45                          | 0.773                       |
| Ind2        | 1                | 15         | 1.379                         | 0.609                       |
| Ind2        | 1                | 16         | 1.66                          | 0.66                        |
| Ind2        | 1                | 17         | 1.938                         | 0.938                       |
| Ind2        | 1                | 18         | 1.536                         | 0.547                       |
| Ind2        | 1                | 19         | 1.326                         | 0.669                       |
| Ind2        | 1                | 20         | 2.067                         | 1.067                       |
| Ind2        | 1                | 21         | 1.291                         | 0.488                       |
| Ind2        | 1                | 22         | 1.808                         | 0.808                       |
| Ind2        | 3                | 1          | 1.417                         | 0.725                       |
| Ind2        | 3                | 2          | 1.581                         | 0.581                       |
| Ind2        | 3                | 3          | 1.227                         | 0.584                       |
| Ind2        | 3                | 4          | 0.99                          | 0.498                       |
| Ind2        | 3                | 5          | 1.612                         | 0.612                       |
| Ind2        | 3                | 6          | 1.326                         | 0.501                       |
| Ind2        | 3                | 7          | 1.842                         | 0.842                       |
| Ind2        | 3                | 8          | 1.621                         | 0.621                       |
| Ind2        | 3                | 9          | 1.598                         | 0.598                       |
| Ind2        | 3                | 10         | 1.566                         | 0.672                       |
| Ind2        | 3                | 11         | 1.476                         | 0.531                       |
| Ind2        | 3                | 12         | 1.748                         | 0.87                        |
| Ind2        | 3                | 13         | 1.32                          | 0.602                       |
| Ind2        | 3                | 14         | 2.158                         | 1.158                       |

| <b>Drug</b> | <b>Dose (mM)</b> | <b>Chr</b> | <b>Significance threshold</b> | <b>Suggestive threshold</b> |
|-------------|------------------|------------|-------------------------------|-----------------------------|
| Ind2        | 3                | 15         | 1.116                         | 0.545                       |
| Ind2        | 3                | 16         | 1.304                         | 0.524                       |
| Ind2        | 3                | 17         | 1.542                         | 0.542                       |
| Ind2        | 3                | 18         | 1.631                         | 0.638                       |
| Ind2        | 3                | 19         | 1.405                         | 0.557                       |
| Ind2        | 3                | 20         | 1.335                         | 0.595                       |
| Ind2        | 3                | 21         | 1.351                         | 0.605                       |
| Ind2        | 3                | 22         | 1.411                         | 0.564                       |
| Ind2        | 10               | 1          | 1.018                         | 0.504                       |
| Ind2        | 10               | 2          | 1.243                         | 0.515                       |
| Ind2        | 10               | 3          | 1.257                         | 0.578                       |
| Ind2        | 10               | 4          | 0.949                         | 0.404                       |
| Ind2        | 10               | 5          | 0.952                         | 0.413                       |
| Ind2        | 10               | 6          | 1.199                         | 0.515                       |
| Ind2        | 10               | 7          | 1.151                         | 0.567                       |
| Ind2        | 10               | 8          | 1.21                          | 0.568                       |
| Ind2        | 10               | 9          | 0.933                         | 0.515                       |
| Ind2        | 10               | 10         | 1.08                          | 0.638                       |
| Ind2        | 10               | 11         | 0.891                         | 0.486                       |
| Ind2        | 10               | 12         | 0.885                         | 0.579                       |
| Ind2        | 10               | 13         | 0.852                         | 0.349                       |
| Ind2        | 10               | 14         | 0.935                         | 0.391                       |
| Ind2        | 10               | 15         | 1.058                         | 0.553                       |
| Ind2        | 10               | 16         | 0.892                         | 0.419                       |
| Ind2        | 10               | 17         | 1.141                         | 0.458                       |
| Ind2        | 10               | 18         | 1.71                          | 0.71                        |
| Ind2        | 10               | 19         | 1.275                         | 0.578                       |
| Ind2        | 10               | 20         | 1.22                          | 0.59                        |
| Ind2        | 10               | 21         | 0.999                         | 0.529                       |
| Ind2        | 10               | 22         | 1.011                         | 0.441                       |
| Ind2        | 30               | 1          | 1.321                         | 0.608                       |
| Ind2        | 30               | 2          | 1.345                         | 0.623                       |
| Ind2        | 30               | 3          | 1.405                         | 0.587                       |
| Ind2        | 30               | 4          | 1.273                         | 0.564                       |
| Ind2        | 30               | 5          | 1.065                         | 0.524                       |
| Ind2        | 30               | 6          | 1.261                         | 0.629                       |
| Ind2        | 30               | 7          | 1.331                         | 0.697                       |
| Ind2        | 30               | 8          | 1.183                         | 0.587                       |
| Ind2        | 30               | 9          | 1.036                         | 0.527                       |
| Ind2        | 30               | 10         | 1.409                         | 0.579                       |
| Ind2        | 30               | 11         | 1.307                         | 0.539                       |
| Ind2        | 30               | 12         | 1.386                         | 0.705                       |
| Ind2        | 30               | 13         | 0.912                         | 0.438                       |
| Ind2        | 30               | 14         | 1.358                         | 0.593                       |
| Ind2        | 30               | 15         | 1.146                         | 0.566                       |
| Ind2        | 30               | 16         | 1.21                          | 0.545                       |
| Ind2        | 30               | 17         | 1.256                         | 0.545                       |
| Ind2        | 30               | 18         | 1.361                         | 0.58                        |
| Ind2        | 30               | 19         | 1.503                         | 0.67                        |
| Ind2        | 30               | 20         | 1.661                         | 0.661                       |



| <b>Drug</b> | <b>Dose (mM)</b> | <b>Chr</b> | <b>Significance threshold</b> | <b>Suggestive threshold</b> |
|-------------|------------------|------------|-------------------------------|-----------------------------|
| Ind2        | 30               | 21         | 1.212                         | 0.669                       |
| Ind2        | 30               | 22         | 1.188                         | 0.547                       |
| Ind3        | 0.01             | 1          | 0.806                         | 0.371                       |
| Ind3        | 0.01             | 2          | 0.915                         | 0.472                       |
| Ind3        | 0.01             | 3          | 0.841                         | 0.406                       |
| Ind3        | 0.01             | 4          | 1.064                         | 0.437                       |
| Ind3        | 0.01             | 5          | 1.056                         | 0.575                       |
| Ind3        | 0.01             | 6          | 0.837                         | 0.367                       |
| Ind3        | 0.01             | 7          | 0.963                         | 0.504                       |
| Ind3        | 0.01             | 8          | 1.199                         | 0.556                       |
| Ind3        | 0.01             | 9          | 0.941                         | 0.566                       |
| Ind3        | 0.01             | 10         | 0.877                         | 0.432                       |
| Ind3        | 0.01             | 11         | 0.944                         | 0.461                       |
| Ind3        | 0.01             | 12         | 1.086                         | 0.518                       |
| Ind3        | 0.01             | 13         | 1.007                         | 0.587                       |
| Ind3        | 0.01             | 14         | 0.838                         | 0.469                       |
| Ind3        | 0.01             | 15         | 0.965                         | 0.494                       |
| Ind3        | 0.01             | 16         | 1.098                         | 0.55                        |
| Ind3        | 0.01             | 17         | 1.005                         | 0.543                       |
| Ind3        | 0.01             | 18         | 1.058                         | 0.459                       |
| Ind3        | 0.01             | 19         | 0.877                         | 0.501                       |
| Ind3        | 0.01             | 20         | 0.744                         | 0.411                       |
| Ind3        | 0.01             | 21         | 0.989                         | 0.395                       |
| Ind3        | 0.01             | 22         | 0.744                         | 0.561                       |
| Ind3        | 1                | 1          | 1.33                          | 0.583                       |
| Ind3        | 1                | 2          | 1.339                         | 0.571                       |
| Ind3        | 1                | 3          | 1.145                         | 0.55                        |
| Ind3        | 1                | 4          | 1.487                         | 0.685                       |
| Ind3        | 1                | 5          | 1.594                         | 0.681                       |
| Ind3        | 1                | 6          | 1.21                          | 0.656                       |
| Ind3        | 1                | 7          | 1.159                         | 0.624                       |
| Ind3        | 1                | 8          | 1.057                         | 0.535                       |
| Ind3        | 1                | 9          | 1.156                         | 0.527                       |
| Ind3        | 1                | 10         | 1.085                         | 0.495                       |
| Ind3        | 1                | 11         | 1.015                         | 0.53                        |
| Ind3        | 1                | 12         | 1.275                         | 0.684                       |
| Ind3        | 1                | 13         | 1.155                         | 0.695                       |
| Ind3        | 1                | 14         | 1.163                         | 0.708                       |
| Ind3        | 1                | 15         | 1.479                         | 0.605                       |
| Ind3        | 1                | 16         | 0.853                         | 0.349                       |
| Ind3        | 1                | 17         | 1.117                         | 0.6                         |
| Ind3        | 1                | 18         | 1.035                         | 0.566                       |
| Ind3        | 1                | 19         | 1.209                         | 0.626                       |
| Ind3        | 1                | 20         | 1.584                         | 0.621                       |
| Ind3        | 1                | 21         | 0.921                         | 0.409                       |
| Ind3        | 1                | 22         | 0.92                          | 0.437                       |
| Ind3        | 3                | 1          | 1.285                         | 0.531                       |
| Ind3        | 3                | 2          | 1.468                         | 0.545                       |
| Ind3        | 3                | 3          | 1.095                         | 0.559                       |
| Ind3        | 3                | 4          | 1.322                         | 0.68                        |

| <b>Drug</b> | <b>Dose (mM)</b> | <b>Chr</b> | <b>Significance threshold</b> | <b>Suggestive threshold</b> |
|-------------|------------------|------------|-------------------------------|-----------------------------|
| Ind3        | 3                | 5          | 1.365                         | 0.584                       |
| Ind3        | 3                | 6          | 1.371                         | 0.429                       |
| Ind3        | 3                | 7          | 1.534                         | 0.714                       |
| Ind3        | 3                | 8          | 1.35                          | 0.621                       |
| Ind3        | 3                | 9          | 1.225                         | 0.543                       |
| Ind3        | 3                | 10         | 1.318                         | 0.579                       |
| Ind3        | 3                | 11         | 1.368                         | 0.579                       |
| Ind3        | 3                | 12         | 1.366                         | 0.634                       |
| Ind3        | 3                | 13         | 2.132                         | 1.132                       |
| Ind3        | 3                | 14         | 1.618                         | 0.902                       |
| Ind3        | 3                | 15         | 1.445                         | 0.752                       |
| Ind3        | 3                | 16         | 1.581                         | 0.68                        |
| Ind3        | 3                | 17         | 1.676                         | 0.676                       |
| Ind3        | 3                | 18         | 1.752                         | 0.752                       |
| Ind3        | 3                | 19         | 1.546                         | 0.712                       |
| Ind3        | 3                | 20         | 1.804                         | 0.804                       |
| Ind3        | 3                | 21         | 1.771                         | 0.788                       |
| Ind3        | 3                | 22         | 1.156                         | 0.752                       |
| Ind3        | 5                | 1          | 1.476                         | 0.584                       |
| Ind3        | 5                | 2          | 1.407                         | 0.536                       |
| Ind3        | 5                | 3          | 1.549                         | 0.67                        |
| Ind3        | 5                | 4          | 1.295                         | 0.616                       |
| Ind3        | 5                | 5          | 1.588                         | 0.588                       |
| Ind3        | 5                | 6          | 1.345                         | 0.522                       |
| Ind3        | 5                | 7          | 1.407                         | 0.609                       |
| Ind3        | 5                | 8          | 1.505                         | 0.769                       |
| Ind3        | 5                | 9          | 1.438                         | 0.654                       |
| Ind3        | 5                | 10         | 1.935                         | 0.935                       |
| Ind3        | 5                | 11         | 1.167                         | 0.507                       |
| Ind3        | 5                | 12         | 1.839                         | 0.839                       |
| Ind3        | 5                | 13         | 1.198                         | 0.402                       |
| Ind3        | 5                | 14         | 1.557                         | 0.737                       |
| Ind3        | 5                | 15         | 1.335                         | 0.565                       |
| Ind3        | 5                | 16         | 1.589                         | 0.589                       |
| Ind3        | 5                | 17         | 1.522                         | 0.711                       |
| Ind3        | 5                | 18         | 1.191                         | 0.472                       |
| Ind3        | 5                | 19         | 1.638                         | 0.889                       |
| Ind3        | 5                | 20         | 1.461                         | 0.695                       |
| Ind3        | 5                | 21         | 1.252                         | 0.643                       |
| Ind3        | 5                | 22         | 1.187                         | 0.766                       |
| Ind3        | 7                | 1          | 1.404                         | 0.62                        |
| Ind3        | 7                | 2          | 1.185                         | 0.519                       |
| Ind3        | 7                | 3          | 1.622                         | 0.732                       |
| Ind3        | 7                | 4          | 1.417                         | 0.551                       |
| Ind3        | 7                | 5          | 1.59                          | 0.623                       |
| Ind3        | 7                | 6          | 1.261                         | 0.495                       |
| Ind3        | 7                | 7          | 1.867                         | 0.867                       |
| Ind3        | 7                | 8          | 1.55                          | 0.643                       |
| Ind3        | 7                | 9          | 1.844                         | 0.844                       |
| Ind3        | 7                | 10         | 1.779                         | 0.779                       |

| <b>Drug</b> | <b>Dose (mM)</b> | <b>Chr</b> | <b>Significance threshold</b> | <b>Suggestive threshold</b> |
|-------------|------------------|------------|-------------------------------|-----------------------------|
| Ind3        | 7                | 11         | 1.603                         | 0.603                       |
| Ind3        | 7                | 12         | 1.748                         | 0.748                       |
| Ind3        | 7                | 13         | 1.263                         | 0.402                       |
| Ind3        | 7                | 14         | 1.726                         | 0.726                       |
| Ind3        | 7                | 15         | 1.395                         | 0.616                       |
| Ind3        | 7                | 16         | 1.58                          | 0.648                       |
| Ind3        | 7                | 17         | 1.428                         | 0.557                       |
| Ind3        | 7                | 18         | 1.631                         | 0.668                       |
| Ind3        | 7                | 19         | 1.542                         | 0.675                       |
| Ind3        | 7                | 20         | 1.594                         | 0.691                       |
| Ind3        | 7                | 21         | 1.361                         | 0.708                       |
| Ind3        | 7                | 22         | 1.363                         | 0.634                       |
| Ind3        | 10               | 1          | 1.268                         | 0.592                       |
| Ind3        | 10               | 2          | 1.333                         | 0.542                       |
| Ind3        | 10               | 3          | 1.215                         | 0.554                       |
| Ind3        | 10               | 4          | 1.287                         | 0.497                       |
| Ind3        | 10               | 5          | 1.104                         | 0.514                       |
| Ind3        | 10               | 6          | 1.265                         | 0.56                        |
| Ind3        | 10               | 7          | 1.301                         | 0.654                       |
| Ind3        | 10               | 8          | 1.238                         | 0.679                       |
| Ind3        | 10               | 9          | 1.219                         | 0.585                       |
| Ind3        | 10               | 10         | 1.284                         | 0.577                       |
| Ind3        | 10               | 11         | 1.555                         | 0.555                       |
| Ind3        | 10               | 12         | 1.41                          | 0.755                       |
| Ind3        | 10               | 13         | 1.056                         | 0.405                       |
| Ind3        | 10               | 14         | 1.238                         | 0.507                       |
| Ind3        | 10               | 15         | 1.203                         | 0.52                        |
| Ind3        | 10               | 16         | 1.215                         | 0.597                       |
| Ind3        | 10               | 17         | 1.341                         | 0.623                       |
| Ind3        | 10               | 18         | 1.149                         | 0.519                       |
| Ind3        | 10               | 19         | 1.433                         | 0.725                       |
| Ind3        | 10               | 20         | 1.622                         | 0.805                       |
| Ind3        | 10               | 21         | 1.443                         | 0.598                       |
| Ind3        | 10               | 22         | 1.257                         | 0.566                       |
| Ind3        | 30               | 1          | 1.036                         | 0.486                       |
| Ind3        | 30               | 2          | 1.194                         | 0.548                       |
| Ind3        | 30               | 3          | 0.987                         | 0.51                        |
| Ind3        | 30               | 4          | 0.89                          | 0.382                       |
| Ind3        | 30               | 5          | 0.968                         | 0.436                       |
| Ind3        | 30               | 6          | 1.008                         | 0.54                        |
| Ind3        | 30               | 7          | 1.015                         | 0.593                       |
| Ind3        | 30               | 8          | 0.897                         | 0.486                       |
| Ind3        | 30               | 9          | 0.797                         | 0.481                       |
| Ind3        | 30               | 10         | 0.944                         | 0.504                       |
| Ind3        | 30               | 11         | 1.133                         | 0.523                       |
| Ind3        | 30               | 12         | 1.091                         | 0.577                       |
| Ind3        | 30               | 13         | 0.788                         | 0.381                       |
| Ind3        | 30               | 14         | 1.07                          | 0.505                       |
| Ind3        | 30               | 15         | 0.914                         | 0.463                       |
| Ind3        | 30               | 16         | 0.855                         | 0.457                       |

| <b>Drug</b> | <b>Dose (mM)</b> | <b>Chr</b> | <b>Significance threshold</b> | <b>Suggestive threshold</b> |
|-------------|------------------|------------|-------------------------------|-----------------------------|
| Ind3        | 30               | 17         | 1.373                         | 0.46                        |
| Ind3        | 30               | 18         | 1.134                         | 0.503                       |
| Ind3        | 30               | 19         | 1.085                         | 0.485                       |
| Ind3        | 30               | 20         | 1.606                         | 0.606                       |
| Ind3        | 30               | 21         | 0.883                         | 0.536                       |
| Ind3        | 30               | 22         | 0.627                         | 0.367                       |
| Ind3        | 50               | 1          | 1.185                         | 0.639                       |
| Ind3        | 50               | 2          | 1.58                          | 0.717                       |
| Ind3        | 50               | 3          | 1.461                         | 0.642                       |
| Ind3        | 50               | 4          | 1.017                         | 0.525                       |
| Ind3        | 50               | 5          | 1.561                         | 0.561                       |
| Ind3        | 50               | 6          | 1.39                          | 0.603                       |
| Ind3        | 50               | 7          | 1.673                         | 0.715                       |
| Ind3        | 50               | 8          | 1.589                         | 0.608                       |
| Ind3        | 50               | 9          | 1.595                         | 0.7                         |
| Ind3        | 50               | 10         | 1.392                         | 0.684                       |
| Ind3        | 50               | 11         | 1.765                         | 0.765                       |
| Ind3        | 50               | 12         | 1.731                         | 0.791                       |
| Ind3        | 50               | 13         | 1.473                         | 0.552                       |
| Ind3        | 50               | 14         | 1.55                          | 0.706                       |
| Ind3        | 50               | 15         | 1.27                          | 0.508                       |
| Ind3        | 50               | 16         | 1.523                         | 0.523                       |
| Ind3        | 50               | 17         | 1.599                         | 0.599                       |
| Ind3        | 50               | 18         | 1.391                         | 0.547                       |
| Ind3        | 50               | 19         | 1.855                         | 0.855                       |
| Ind3        | 50               | 20         | 2.203                         | 1.203                       |
| Ind3        | 50               | 21         | 1.581                         | 0.746                       |
| Ind3        | 50               | 22         | 1.313                         | 0.425                       |

**Supplemental Dataset 5.** Details of significant and replicating peaks for indenoisoquinolines. All significant QTLs are listed by compound and chromosome (tab 1). The chromosome, the beginning and end of all peaks in centiMorgan (cM) units, and the maximum peak LOD score in the region are listed. Peaks found as significant for one indenoisoquinoline and replicated at the significant or suggestive level in other indenoisoquinolines are also listed (tab 2). The chromosome, the beginning and end of the peak in centiMorgan (cM) units, the compound-concentration combination which was significant at the given chromosomal location (referred to as peak drug and peak dose), the drug-dose combinations which have QTLs at the same location (referred to as related drug and related dose), and the maximum peak LOD score for the related compound-concentration combination in the region are reported.

Peaks Identified as Significant to the Indenoisoquinolines

| Chr | Drug | Dose (mM) | Peak Start (cM) | Peak End (cM) | Peak LOD |
|-----|------|-----------|-----------------|---------------|----------|
| 2   | Ind1 | 0.2       | 20.03           | 34.78         | 1.129    |
| 6   | Ind1 | 0.1       | 124.11          | 161.55        | 1.734    |
| 6   | Ind1 | 0.2       | 128.93          | 192.29        | 1.28     |
| 6   | Ind1 | 0.3       | 120.31          | 156.77        | 1.964    |
| 7   | Ind1 | 0.001     | 74.38           | 89.88         | 1.348    |
| 9   | Ind1 | 0.001     | 146.83          | 163.84        | 1.331    |
| 9   | Ind1 | 0.03      | 8.37            | 60.59         | 1.558    |
| 10  | Ind1 | 0.05      | 127.11          | 155.73        | 1.775    |
| 11  | Ind1 | 0.1       | 22.56           | 131.26        | 1.797    |
| 11  | Ind1 | 0.3       | 51.95           | 119.07        | 1.714    |
| 11  | Ind1 | 3         | 59.77           | 93.12         | 1.591    |
| 13  | Ind1 | 0.1       | 76.26           | 93.52         | 1.21     |
| 14  | Ind1 | 0.5       | 0               | 21.51         | 1.129    |
| 14  | Ind1 | 3         | 99.88           | 125.88        | 1.447    |
| 16  | Ind1 | 0.1       | 65.1            | 104.45        | 1.474    |
| 16  | Ind1 | 0.2       | 15.32           | 108.32        | 1.721    |
| 16  | Ind1 | 0.3       | 59.68           | 108.32        | 1.198    |
| 16  | Ind1 | 0.5       | 1.08            | 29.97         | 1.279    |
| 18  | Ind1 | 0.03      | 90.6            | 96.48         | 1.554    |
| 18  | Ind1 | 0.2       | 0               | 31.17         | 1.038    |
| 19  | Ind1 | 0.1       | 52.59           | 77.54         | 1.574    |
| 21  | Ind1 | 0.03      | 31.26           | 57.77         | 0.778    |
| 1   | Ind2 | 0.01      | 69.86           | 87.31         | 1.345    |
| 4   | Ind2 | 1         | 192.12          | 203.77        | 1.365    |
| 5   | Ind2 | 0.16      | 114.75          | 133.65        | 1.551    |
| 5   | Ind2 | 0.23      | 14.3            | 39.46         | 1.114    |
| 6   | Ind2 | 10        | 120.31          | 159.44        | 1.694    |
| 6   | Ind2 | 30        | 167.78          | 192.29        | 1.273    |
| 7   | Ind2 | 0.16      | 10.68           | 33.05         | 1.143    |
| 7   | Ind2 | 1         | 63.67           | 76.71         | 1.517    |
| 8   | Ind2 | 1         | 104.33          | 122.96        | 1.683    |
| 11  | Ind2 | 1         | 53.02           | 91.47         | 1.593    |
| 11  | Ind2 | 10        | 19.86           | 79.43         | 1.098    |
| 11  | Ind2 | 10        | 86.08           | 110.73        | 1.265    |
| 13  | Ind2 | 10        | 75.19           | 93.52         | 1.019    |
| 13  | Ind2 | 30        | 67.12           | 114.98        | 1.191    |
| 16  | Ind2 | 3         | 35.44           | 99.44         | 2.139    |
| 16  | Ind2 | 10        | 11.46           | 34.22         | 0.959    |
| 21  | Ind2 | 0.23      | 28.48           | 51.49         | 0.587    |
| 2   | Ind3 | 50        | 1.95            | 34.04         | 2.024    |
| 3   | Ind3 | 1         | 177.75          | 203.28        | 1.212    |
| 3   | Ind3 | 3         | 124.16          | 151.49        | 1.148    |
| 3   | Ind3 | 3         | 174.94          | 191.04        | 1.362    |
| 3   | Ind3 | 3         | 203.28          | 228.14        | 1.121    |
| 3   | Ind3 | 5         | 203.28          | 228.14        | 1.877    |
| 4   | Ind3 | 3         | 192.12          | 211.65        | 1.483    |
| 6   | Ind3 | 5         | 128.93          | 177.88        | 1.805    |

Peaks Identified as Significant to the Indenoisoquinolines

| <b>Chr</b> | <b>Drug</b> | <b>Dose (mM)</b> | <b>Peak Start (cM)</b> | <b>Peak End (cM)</b> | <b>Peak LOD</b> |
|------------|-------------|------------------|------------------------|----------------------|-----------------|
| 6          | Ind3        | 7                | 124.11                 | 177.88               | 2.286           |
| 6          | Ind3        | 10               | 120.31                 | 192.29               | 2.195           |
| 6          | Ind3        | 30               | 104.71                 | 151.42               | 1.012           |
| 10         | Ind3        | 1                | 118.94                 | 130.9                | 1.43            |
| 11         | Ind3        | 10               | 86.08                  | 105.74               | 1.592           |
| 11         | Ind3        | 50               | 98.98                  | 138.56               | 2.421           |
| 12         | Ind3        | 1                | 123.33                 | 144.83               | 1.472           |
| 13         | Ind3        | 10               | 77.47                  | 114.98               | 1.44            |
| 13         | Ind3        | 30               | 68.44                  | 102.73               | 0.899           |
| 14         | Ind3        | 5                | 98.96                  | 134.3                | 2.022           |
| 16         | Ind3        | 1                | 27.05                  | 59.68                | 1.097           |
| 16         | Ind3        | 10               | 69.05                  | 104.45               | 1.228           |
| 16         | Ind3        | 30               | 15.32                  | 42.81                | 0.977           |
| 16         | Ind3        | 30               | 50.6                   | 99.44                | 0.93            |

Peaks Identified as Shared by the Indenoisoquinolines

| Chr | Peak Start (cM) | Peak End (cM) | Peak Drug | Peak Dose (mM) | Related Drug | Related Dose (mM) | Related Max LOD |
|-----|-----------------|---------------|-----------|----------------|--------------|-------------------|-----------------|
| 1   | 69.86           | 87.31         | Ind2      | 0.01           | Ind1         | 3                 | 0.4             |
| 1   | 69.86           | 87.31         | Ind2      | 0.01           | Ind1         | 0.03              | 0.682           |
| 1   | 69.86           | 87.31         | Ind2      | 0.01           | Ind1         | 0.001             | 0.54            |
| 2   | 20.03           | 34.78         | Ind1      | 0.2            | Ind3         | 50                | 2.024           |
| 2   | 20.03           | 34.78         | Ind1      | 0.2            | Ind3         | 7                 | 0.534           |
| 2   | 20.03           | 34.78         | Ind1      | 0.2            | Ind3         | 30                | 1.059           |
| 2   | 20.03           | 34.78         | Ind1      | 0.2            | Ind2         | 3                 | 0.567           |
| 2   | 20.03           | 34.78         | Ind1      | 0.2            | Ind2         | 30                | 0.489           |
| 2   | 20.03           | 34.78         | Ind1      | 0.2            | Ind2         | 10                | 0.84            |
| 2   | 1.95            | 34.04         | Ind3      | 50             | Ind2         | 3                 | 1.026           |
| 2   | 1.95            | 34.04         | Ind3      | 50             | Ind2         | 30                | 0.826           |
| 2   | 1.95            | 34.04         | Ind3      | 50             | Ind2         | 10                | 0.84            |
| 2   | 1.95            | 34.04         | Ind3      | 50             | Ind1         | 0.2               | 1.129           |
| 2   | 1.95            | 34.04         | Ind3      | 50             | Ind1         | 0.1               | 0.51            |
| 2   | 1.95            | 34.04         | Ind3      | 50             | Ind1         | 0.3               | 0.661           |
| 2   | 1.95            | 34.04         | Ind3      | 50             | Ind1         | 0.03              | 0.891           |
| 3   | 177.75          | 203.28        | Ind3      | 1              | Ind2         | 3                 | 1.141           |
| 3   | 177.75          | 203.28        | Ind3      | 1              | Ind2         | 0.16              | 0.597           |
| 3   | 177.75          | 203.28        | Ind3      | 1              | Ind2         | 1                 | 0.518           |
| 3   | 177.75          | 203.28        | Ind3      | 1              | Ind2         | 30                | 1.039           |
| 3   | 177.75          | 203.28        | Ind3      | 1              | Ind1         | 0.2               | 0.661           |
| 3   | 177.75          | 203.28        | Ind3      | 1              | Ind1         | 0.3               | 0.852           |
| 3   | 177.75          | 203.28        | Ind3      | 1              | Ind1         | 0.05              | 0.462           |
| 3   | 177.75          | 203.28        | Ind3      | 1              | Ind1         | 0.5               | 0.458           |
| 3   | 124.16          | 151.49        | Ind3      | 3              | Ind2         | 30                | 0.771           |
| 3   | 124.16          | 151.49        | Ind3      | 3              | Ind1         | 3                 | 1.095           |
| 3   | 124.16          | 151.49        | Ind3      | 3              | Ind1         | 0.3               | 0.63            |
| 3   | 124.16          | 151.49        | Ind3      | 3              | Ind1         | 0.001             | 0.712           |
| 3   | 174.94          | 191.04        | Ind3      | 3              | Ind2         | 3                 | 1.141           |
| 3   | 174.94          | 191.04        | Ind3      | 3              | Ind2         | 0.16              | 0.597           |
| 3   | 174.94          | 191.04        | Ind3      | 3              | Ind2         | 1                 | 0.518           |
| 3   | 174.94          | 191.04        | Ind3      | 3              | Ind2         | 30                | 0.7             |
| 3   | 174.94          | 191.04        | Ind3      | 3              | Ind1         | 0.2               | 0.583           |
| 3   | 174.94          | 191.04        | Ind3      | 3              | Ind1         | 0.3               | 0.852           |
| 3   | 203.28          | 228.14        | Ind3      | 3              | Ind2         | 3                 | 0.507           |
| 3   | 203.28          | 228.14        | Ind3      | 3              | Ind2         | 1                 | 1.263           |
| 3   | 203.28          | 228.14        | Ind3      | 3              | Ind2         | 30                | 0.444           |
| 3   | 203.28          | 228.14        | Ind3      | 3              | Ind2         | 10                | 0.502           |
| 3   | 203.28          | 228.14        | Ind3      | 3              | Ind1         | 0.2               | 0.438           |
| 3   | 203.28          | 228.14        | Ind3      | 3              | Ind1         | 0.3               | 0.781           |
| 3   | 203.28          | 228.14        | Ind3      | 3              | Ind1         | 0.05              | 0.462           |
| 3   | 203.28          | 228.14        | Ind3      | 3              | Ind1         | 0.5               | 0.618           |
| 3   | 203.28          | 228.14        | Ind3      | 3              | Ind1         | 0.03              | 1.139           |
| 3   | 203.28          | 228.14        | Ind3      | 5              | Ind2         | 3                 | 0.507           |
| 3   | 203.28          | 228.14        | Ind3      | 5              | Ind2         | 1                 | 1.263           |
| 3   | 203.28          | 228.14        | Ind3      | 5              | Ind2         | 30                | 0.444           |
| 3   | 203.28          | 228.14        | Ind3      | 5              | Ind2         | 10                | 0.502           |



Peaks Identified as Shared by the Indenoisoquinolines

| Chr | Peak Start (cM) | Peak End (cM) | Peak Drug | Peak Dose (mM) | Related Drug | Related Dose (mM) | Related Max LOD |
|-----|-----------------|---------------|-----------|----------------|--------------|-------------------|-----------------|
| 3   | 203.28          | 228.14        | Ind3      | 5              | Ind1         | 0.2               | 0.438           |
| 3   | 203.28          | 228.14        | Ind3      | 5              | Ind1         | 0.3               | 0.781           |
| 3   | 203.28          | 228.14        | Ind3      | 5              | Ind1         | 0.05              | 0.462           |
| 3   | 203.28          | 228.14        | Ind3      | 5              | Ind1         | 0.5               | 0.618           |
| 3   | 203.28          | 228.14        | Ind3      | 5              | Ind1         | 0.03              | 1.139           |
| 4   | 192.12          | 203.77        | Ind2      | 1              | Ind3         | 3                 | 1.483           |
| 4   | 192.12          | 203.77        | Ind2      | 1              | Ind3         | 10                | 0.826           |
| 4   | 192.12          | 203.77        | Ind2      | 1              | Ind1         | 0.1               | 0.417           |
| 4   | 192.12          | 203.77        | Ind2      | 1              | Ind1         | 0.3               | 0.493           |
| 4   | 192.12          | 203.77        | Ind2      | 1              | Ind1         | 0.05              | 0.871           |
| 4   | 192.12          | 211.65        | Ind3      | 3              | Ind2         | 1                 | 1.365           |
| 4   | 192.12          | 211.65        | Ind3      | 3              | Ind2         | 0.23              | 0.531           |
| 4   | 192.12          | 211.65        | Ind3      | 3              | Ind2         | 0.5               | 0.612           |
| 4   | 192.12          | 211.65        | Ind3      | 3              | Ind1         | 0.1               | 0.417           |
| 4   | 192.12          | 211.65        | Ind3      | 3              | Ind1         | 0.3               | 0.493           |
| 4   | 192.12          | 211.65        | Ind3      | 3              | Ind1         | 0.05              | 0.871           |
| 5   | 114.75          | 133.65        | Ind2      | 0.16           | Ind3         | 1                 | 1.37            |
| 5   | 114.75          | 133.65        | Ind2      | 0.16           | Ind1         | 0.001             | 1.546           |
| 5   | 14.3            | 39.46         | Ind2      | 0.23           | Ind3         | 1                 | 0.962           |
| 5   | 14.3            | 39.46         | Ind2      | 0.23           | Ind3         | 0.01              | 0.495           |
| 5   | 14.3            | 39.46         | Ind2      | 0.23           | Ind1         | 3                 | 0.543           |
| 5   | 14.3            | 39.46         | Ind2      | 0.23           | Ind1         | 0.001             | 0.639           |
| 6   | 124.11          | 161.55        | Ind1      | 0.1            | Ind3         | 50                | 0.787           |
| 6   | 124.11          | 161.55        | Ind1      | 0.1            | Ind3         | 7                 | 2.286           |
| 6   | 124.11          | 161.55        | Ind1      | 0.1            | Ind3         | 30                | 1.012           |
| 6   | 124.11          | 161.55        | Ind1      | 0.1            | Ind3         | 10                | 2.195           |
| 6   | 124.11          | 161.55        | Ind1      | 0.1            | Ind3         | 5                 | 1.805           |
| 6   | 124.11          | 161.55        | Ind1      | 0.1            | Ind2         | 3                 | 1.091           |
| 6   | 124.11          | 161.55        | Ind1      | 0.1            | Ind2         | 1                 | 0.513           |
| 6   | 124.11          | 161.55        | Ind1      | 0.1            | Ind2         | 0.01              | 0.789           |
| 6   | 124.11          | 161.55        | Ind1      | 0.1            | Ind2         | 30                | 1.235           |
| 6   | 124.11          | 161.55        | Ind1      | 0.1            | Ind2         | 0.23              | 0.645           |
| 6   | 124.11          | 161.55        | Ind1      | 0.1            | Ind2         | 10                | 1.694           |
| 6   | 128.93          | 192.29        | Ind1      | 0.2            | Ind3         | 50                | 1.158           |
| 6   | 128.93          | 192.29        | Ind1      | 0.2            | Ind3         | 3                 | 0.71            |
| 6   | 128.93          | 192.29        | Ind1      | 0.2            | Ind3         | 7                 | 2.286           |
| 6   | 128.93          | 192.29        | Ind1      | 0.2            | Ind3         | 30                | 1.012           |
| 6   | 128.93          | 192.29        | Ind1      | 0.2            | Ind3         | 10                | 2.195           |
| 6   | 128.93          | 192.29        | Ind1      | 0.2            | Ind3         | 5                 | 1.805           |
| 6   | 128.93          | 192.29        | Ind1      | 0.2            | Ind2         | 3                 | 1.091           |
| 6   | 128.93          | 192.29        | Ind1      | 0.2            | Ind2         | 1                 | 0.603           |
| 6   | 128.93          | 192.29        | Ind1      | 0.2            | Ind2         | 0.01              | 0.896           |
| 6   | 128.93          | 192.29        | Ind1      | 0.2            | Ind2         | 30                | 1.273           |
| 6   | 128.93          | 192.29        | Ind1      | 0.2            | Ind2         | 0.23              | 0.645           |
| 6   | 128.93          | 192.29        | Ind1      | 0.2            | Ind2         | 10                | 1.694           |
| 6   | 120.31          | 156.77        | Ind1      | 0.3            | Ind3         | 50                | 0.787           |
| 6   | 120.31          | 156.77        | Ind1      | 0.3            | Ind3         | 7                 | 2.286           |

Peaks Identified as Shared by the Indenoisoquinolines

| Chr | Peak Start (cM) | Peak End (cM) | Peak Drug | Peak Dose (mM) | Related Drug | Related Dose (mM) | Related Max LOD |
|-----|-----------------|---------------|-----------|----------------|--------------|-------------------|-----------------|
| 6   | 120.31          | 156.77        | Ind1      | 0.3            | Ind3         | 30                | 1.012           |
| 6   | 120.31          | 156.77        | Ind1      | 0.3            | Ind3         | 10                | 2.195           |
| 6   | 120.31          | 156.77        | Ind1      | 0.3            | Ind3         | 5                 | 1.805           |
| 6   | 120.31          | 156.77        | Ind1      | 0.3            | Ind2         | 3                 | 1.091           |
| 6   | 120.31          | 156.77        | Ind1      | 0.3            | Ind2         | 0.01              | 0.615           |
| 6   | 120.31          | 156.77        | Ind1      | 0.3            | Ind2         | 30                | 1.235           |
| 6   | 120.31          | 156.77        | Ind1      | 0.3            | Ind2         | 0.23              | 0.491           |
| 6   | 120.31          | 156.77        | Ind1      | 0.3            | Ind2         | 10                | 1.694           |
| 6   | 120.31          | 159.44        | Ind2      | 10             | Ind3         | 50                | 0.787           |
| 6   | 120.31          | 159.44        | Ind2      | 10             | Ind3         | 7                 | 2.286           |
| 6   | 120.31          | 159.44        | Ind2      | 10             | Ind3         | 30                | 1.012           |
| 6   | 120.31          | 159.44        | Ind2      | 10             | Ind3         | 10                | 2.195           |
| 6   | 120.31          | 159.44        | Ind2      | 10             | Ind3         | 5                 | 1.805           |
| 6   | 120.31          | 159.44        | Ind2      | 10             | Ind1         | 0.2               | 1.28            |
| 6   | 120.31          | 159.44        | Ind2      | 10             | Ind1         | 3                 | 1.169           |
| 6   | 120.31          | 159.44        | Ind2      | 10             | Ind1         | 0.1               | 1.734           |
| 6   | 120.31          | 159.44        | Ind2      | 10             | Ind1         | 0.3               | 1.964           |
| 6   | 120.31          | 159.44        | Ind2      | 10             | Ind1         | 0.5               | 0.698           |
| 6   | 120.31          | 159.44        | Ind2      | 10             | Ind1         | 0.001             | 0.545           |
| 6   | 167.78          | 192.29        | Ind2      | 30             | Ind3         | 50                | 1.158           |
| 6   | 167.78          | 192.29        | Ind2      | 30             | Ind3         | 3                 | 0.71            |
| 6   | 167.78          | 192.29        | Ind2      | 30             | Ind3         | 7                 | 0.727           |
| 6   | 167.78          | 192.29        | Ind2      | 30             | Ind3         | 30                | 0.471           |
| 6   | 167.78          | 192.29        | Ind2      | 30             | Ind3         | 10                | 1.352           |
| 6   | 167.78          | 192.29        | Ind2      | 30             | Ind3         | 5                 | 0.842           |
| 6   | 167.78          | 192.29        | Ind2      | 30             | Ind1         | 0.2               | 0.988           |
| 6   | 167.78          | 192.29        | Ind2      | 30             | Ind1         | 3                 | 0.533           |
| 6   | 167.78          | 192.29        | Ind2      | 30             | Ind1         | 0.1               | 0.675           |
| 6   | 167.78          | 192.29        | Ind2      | 30             | Ind1         | 0.3               | 0.592           |
| 6   | 167.78          | 192.29        | Ind2      | 30             | Ind1         | 0.05              | 0.528           |
| 6   | 167.78          | 192.29        | Ind2      | 30             | Ind1         | 0.001             | 0.484           |
| 6   | 128.93          | 177.88        | Ind3      | 5              | Ind2         | 3                 | 1.091           |
| 6   | 128.93          | 177.88        | Ind3      | 5              | Ind2         | 1                 | 0.603           |
| 6   | 128.93          | 177.88        | Ind3      | 5              | Ind2         | 0.01              | 0.895           |
| 6   | 128.93          | 177.88        | Ind3      | 5              | Ind2         | 30                | 1.273           |
| 6   | 128.93          | 177.88        | Ind3      | 5              | Ind2         | 0.23              | 0.645           |
| 6   | 128.93          | 177.88        | Ind3      | 5              | Ind2         | 10                | 1.694           |
| 6   | 128.93          | 177.88        | Ind3      | 5              | Ind1         | 0.2               | 1.28            |
| 6   | 128.93          | 177.88        | Ind3      | 5              | Ind1         | 3                 | 1.169           |
| 6   | 128.93          | 177.88        | Ind3      | 5              | Ind1         | 0.1               | 1.734           |
| 6   | 128.93          | 177.88        | Ind3      | 5              | Ind1         | 0.3               | 1.964           |
| 6   | 128.93          | 177.88        | Ind3      | 5              | Ind1         | 0.05              | 0.471           |
| 6   | 128.93          | 177.88        | Ind3      | 5              | Ind1         | 0.5               | 0.698           |
| 6   | 128.93          | 177.88        | Ind3      | 5              | Ind1         | 0.001             | 0.545           |
| 6   | 124.11          | 177.88        | Ind3      | 7              | Ind2         | 3                 | 1.091           |
| 6   | 124.11          | 177.88        | Ind3      | 7              | Ind2         | 1                 | 0.603           |
| 6   | 124.11          | 177.88        | Ind3      | 7              | Ind2         | 0.01              | 0.895           |

Peaks Identified as Shared by the Indenoisoquinolines

| Chr | Peak Start (cM) | Peak End (cM) | Peak Drug | Peak Dose (mM) | Related Drug | Related Dose (mM) | Related Max LOD |
|-----|-----------------|---------------|-----------|----------------|--------------|-------------------|-----------------|
| 6   | 124.11          | 177.88        | Ind3      | 7              | Ind2         | 30                | 1.273           |
| 6   | 124.11          | 177.88        | Ind3      | 7              | Ind2         | 0.23              | 0.645           |
| 6   | 124.11          | 177.88        | Ind3      | 7              | Ind2         | 10                | 1.694           |
| 6   | 124.11          | 177.88        | Ind3      | 7              | Ind1         | 0.2               | 1.28            |
| 6   | 124.11          | 177.88        | Ind3      | 7              | Ind1         | 3                 | 1.169           |
| 6   | 124.11          | 177.88        | Ind3      | 7              | Ind1         | 0.1               | 1.734           |
| 6   | 124.11          | 177.88        | Ind3      | 7              | Ind1         | 0.3               | 1.964           |
| 6   | 124.11          | 177.88        | Ind3      | 7              | Ind1         | 0.05              | 0.471           |
| 6   | 124.11          | 177.88        | Ind3      | 7              | Ind1         | 0.5               | 0.698           |
| 6   | 124.11          | 177.88        | Ind3      | 7              | Ind1         | 0.001             | 0.545           |
| 6   | 120.31          | 192.29        | Ind3      | 10             | Ind2         | 3                 | 1.091           |
| 6   | 120.31          | 192.29        | Ind3      | 10             | Ind2         | 1                 | 0.603           |
| 6   | 120.31          | 192.29        | Ind3      | 10             | Ind2         | 0.01              | 0.896           |
| 6   | 120.31          | 192.29        | Ind3      | 10             | Ind2         | 30                | 1.273           |
| 6   | 120.31          | 192.29        | Ind3      | 10             | Ind2         | 0.23              | 0.645           |
| 6   | 120.31          | 192.29        | Ind3      | 10             | Ind2         | 10                | 1.694           |
| 6   | 120.31          | 192.29        | Ind3      | 10             | Ind1         | 0.2               | 1.28            |
| 6   | 120.31          | 192.29        | Ind3      | 10             | Ind1         | 3                 | 1.169           |
| 6   | 120.31          | 192.29        | Ind3      | 10             | Ind1         | 0.1               | 1.734           |
| 6   | 120.31          | 192.29        | Ind3      | 10             | Ind1         | 0.3               | 1.964           |
| 6   | 120.31          | 192.29        | Ind3      | 10             | Ind1         | 0.05              | 0.528           |
| 6   | 120.31          | 192.29        | Ind3      | 10             | Ind1         | 0.5               | 0.698           |
| 6   | 120.31          | 192.29        | Ind3      | 10             | Ind1         | 0.001             | 0.545           |
| 6   | 104.71          | 151.42        | Ind3      | 30             | Ind2         | 3                 | 1.091           |
| 6   | 104.71          | 151.42        | Ind3      | 30             | Ind2         | 0.01              | 0.85            |
| 6   | 104.71          | 151.42        | Ind3      | 30             | Ind2         | 30                | 1.235           |
| 6   | 104.71          | 151.42        | Ind3      | 30             | Ind2         | 0.23              | 0.457           |
| 6   | 104.71          | 151.42        | Ind3      | 30             | Ind2         | 10                | 1.694           |
| 6   | 104.71          | 151.42        | Ind3      | 30             | Ind1         | 0.2               | 1.28            |
| 6   | 104.71          | 151.42        | Ind3      | 30             | Ind1         | 3                 | 1.169           |
| 6   | 104.71          | 151.42        | Ind3      | 30             | Ind1         | 0.1               | 1.734           |
| 6   | 104.71          | 151.42        | Ind3      | 30             | Ind1         | 0.3               | 1.964           |
| 6   | 104.71          | 151.42        | Ind3      | 30             | Ind1         | 0.5               | 0.698           |
| 7   | 74.38           | 89.88         | Ind1      | 0.001          | Ind3         | 1                 | 0.846           |
| 7   | 74.38           | 89.88         | Ind1      | 0.001          | Ind3         | 0.01              | 0.775           |
| 7   | 74.38           | 89.88         | Ind1      | 0.001          | Ind3         | 7                 | 0.573           |
| 7   | 74.38           | 89.88         | Ind1      | 0.001          | Ind2         | 0.16              | 0.561           |
| 7   | 74.38           | 89.88         | Ind1      | 0.001          | Ind2         | 1                 | 1.162           |
| 7   | 74.38           | 89.88         | Ind1      | 0.001          | Ind2         | 0.5               | 1.06            |
| 7   | 10.68           | 33.05         | Ind2      | 0.16           | Ind1         | 3                 | 0.457           |
| 7   | 10.68           | 33.05         | Ind2      | 0.16           | Ind1         | 0.1               | 0.563           |
| 7   | 10.68           | 33.05         | Ind2      | 0.16           | Ind1         | 0.05              | 0.645           |
| 7   | 63.67           | 76.71         | Ind2      | 1              | Ind3         | 1                 | 0.846           |
| 7   | 63.67           | 76.71         | Ind2      | 1              | Ind3         | 0.01              | 0.509           |
| 7   | 63.67           | 76.71         | Ind2      | 1              | Ind3         | 7                 | 0.966           |
| 7   | 63.67           | 76.71         | Ind2      | 1              | Ind1         | 3                 | 0.472           |
| 7   | 63.67           | 76.71         | Ind2      | 1              | Ind1         | 0.001             | 1.348           |

Peaks Identified as Shared by the Indenoisoquinolines

| Chr | Peak Start (cM) | Peak End (cM) | Peak Drug | Peak Dose (mM) | Related Drug | Related Dose (mM) | Related Max LOD |
|-----|-----------------|---------------|-----------|----------------|--------------|-------------------|-----------------|
| 8   | 104.33          | 122.96        | Ind2      | 1              | Ind3         | 50                | 1.149           |
| 8   | 104.33          | 122.96        | Ind2      | 1              | Ind3         | 1                 | 0.521           |
| 8   | 104.33          | 122.96        | Ind2      | 1              | Ind3         | 3                 | 0.596           |
| 8   | 104.33          | 122.96        | Ind2      | 1              | Ind3         | 10                | 0.821           |
| 8   | 104.33          | 122.96        | Ind2      | 1              | Ind1         | 0.2               | 0.642           |
| 8   | 104.33          | 122.96        | Ind2      | 1              | Ind1         | 0.1               | 1.063           |
| 8   | 104.33          | 122.96        | Ind2      | 1              | Ind1         | 0.3               | 0.416           |
| 9   | 146.83          | 163.84        | Ind1      | 0.001          | Ind3         | 3                 | 0.615           |
| 9   | 8.37            | 60.59         | Ind1      | 0.03           | Ind3         | 10                | 0.811           |
| 9   | 8.37            | 60.59         | Ind1      | 0.03           | Ind2         | 0.16              | 0.573           |
| 9   | 8.37            | 60.59         | Ind1      | 0.03           | Ind2         | 0.01              | 0.722           |
| 9   | 8.37            | 60.59         | Ind1      | 0.03           | Ind2         | 30                | 0.604           |
| 10  | 127.11          | 155.73        | Ind1      | 0.05           | Ind3         | 1                 | 1.324           |
| 10  | 127.11          | 155.73        | Ind1      | 0.05           | Ind3         | 7                 | 0.4             |
| 10  | 127.11          | 155.73        | Ind1      | 0.05           | Ind3         | 10                | 0.506           |
| 10  | 127.11          | 155.73        | Ind1      | 0.05           | Ind2         | 1                 | 0.687           |
| 10  | 127.11          | 155.73        | Ind1      | 0.05           | Ind2         | 0.23              | 1.407           |
| 10  | 127.11          | 155.73        | Ind1      | 0.05           | Ind2         | 0.5               | 0.614           |
| 10  | 118.94          | 130.9         | Ind3      | 1              | Ind2         | 1                 | 0.874           |
| 10  | 118.94          | 130.9         | Ind3      | 1              | Ind2         | 0.23              | 0.986           |
| 10  | 118.94          | 130.9         | Ind3      | 1              | Ind1         | 0.05              | 0.966           |
| 10  | 118.94          | 130.9         | Ind3      | 1              | Ind1         | 0.5               | 0.566           |
| 10  | 118.94          | 130.9         | Ind3      | 1              | Ind1         | 0.001             | 0.444           |
| 11  | 22.56           | 131.26        | Ind1      | 0.1            | Ind3         | 50                | 2.421           |
| 11  | 22.56           | 131.26        | Ind1      | 0.1            | Ind3         | 3                 | 0.925           |
| 11  | 22.56           | 131.26        | Ind1      | 0.1            | Ind3         | 7                 | 1.037           |
| 11  | 22.56           | 131.26        | Ind1      | 0.1            | Ind3         | 30                | 1.069           |
| 11  | 22.56           | 131.26        | Ind1      | 0.1            | Ind3         | 10                | 1.592           |
| 11  | 22.56           | 131.26        | Ind1      | 0.1            | Ind3         | 5                 | 1.031           |
| 11  | 22.56           | 131.26        | Ind1      | 0.1            | Ind2         | 3                 | 1.064           |
| 11  | 22.56           | 131.26        | Ind1      | 0.1            | Ind2         | 0.16              | 0.614           |
| 11  | 22.56           | 131.26        | Ind1      | 0.1            | Ind2         | 1                 | 1.593           |
| 11  | 22.56           | 131.26        | Ind1      | 0.1            | Ind2         | 0.01              | 0.885           |
| 11  | 22.56           | 131.26        | Ind1      | 0.1            | Ind2         | 30                | 0.879           |
| 11  | 22.56           | 131.26        | Ind1      | 0.1            | Ind2         | 10                | 1.265           |
| 11  | 51.95           | 119.07        | Ind1      | 0.3            | Ind3         | 50                | 2.097           |
| 11  | 51.95           | 119.07        | Ind1      | 0.3            | Ind3         | 3                 | 0.925           |
| 11  | 51.95           | 119.07        | Ind1      | 0.3            | Ind3         | 7                 | 1.037           |
| 11  | 51.95           | 119.07        | Ind1      | 0.3            | Ind3         | 30                | 0.955           |
| 11  | 51.95           | 119.07        | Ind1      | 0.3            | Ind3         | 10                | 1.592           |
| 11  | 51.95           | 119.07        | Ind1      | 0.3            | Ind3         | 5                 | 1.031           |
| 11  | 51.95           | 119.07        | Ind1      | 0.3            | Ind2         | 3                 | 1.064           |
| 11  | 51.95           | 119.07        | Ind1      | 0.3            | Ind2         | 0.16              | 0.614           |
| 11  | 51.95           | 119.07        | Ind1      | 0.3            | Ind2         | 1                 | 1.593           |
| 11  | 51.95           | 119.07        | Ind1      | 0.3            | Ind2         | 0.01              | 0.885           |
| 11  | 51.95           | 119.07        | Ind1      | 0.3            | Ind2         | 30                | 0.853           |
| 11  | 51.95           | 119.07        | Ind1      | 0.3            | Ind2         | 10                | 1.265           |

Peaks Identified as Shared by the Indenoisoquinolines

| Chr | Peak Start (cM) | Peak End (cM) | Peak Drug | Peak Dose (mM) | Related Drug | Related Dose (mM) | Related Max LOD |
|-----|-----------------|---------------|-----------|----------------|--------------|-------------------|-----------------|
| 11  | 59.77           | 93.12         | Ind1      | 3              | Ind3         | 50                | 1.18            |
| 11  | 59.77           | 93.12         | Ind1      | 3              | Ind3         | 3                 | 0.925           |
| 11  | 59.77           | 93.12         | Ind1      | 3              | Ind3         | 7                 | 1.037           |
| 11  | 59.77           | 93.12         | Ind1      | 3              | Ind3         | 30                | 0.741           |
| 11  | 59.77           | 93.12         | Ind1      | 3              | Ind3         | 10                | 1.592           |
| 11  | 59.77           | 93.12         | Ind1      | 3              | Ind3         | 5                 | 1.013           |
| 11  | 59.77           | 93.12         | Ind1      | 3              | Ind2         | 3                 | 1.064           |
| 11  | 59.77           | 93.12         | Ind1      | 3              | Ind2         | 1                 | 1.593           |
| 11  | 59.77           | 93.12         | Ind1      | 3              | Ind2         | 0.01              | 0.885           |
| 11  | 59.77           | 93.12         | Ind1      | 3              | Ind2         | 30                | 0.603           |
| 11  | 59.77           | 93.12         | Ind1      | 3              | Ind2         | 10                | 1.265           |
| 11  | 53.02           | 91.47         | Ind2      | 1              | Ind3         | 50                | 1.18            |
| 11  | 53.02           | 91.47         | Ind2      | 1              | Ind3         | 3                 | 0.925           |
| 11  | 53.02           | 91.47         | Ind2      | 1              | Ind3         | 7                 | 1.037           |
| 11  | 53.02           | 91.47         | Ind2      | 1              | Ind3         | 30                | 0.777           |
| 11  | 53.02           | 91.47         | Ind2      | 1              | Ind3         | 10                | 1.592           |
| 11  | 53.02           | 91.47         | Ind2      | 1              | Ind3         | 5                 | 1.031           |
| 11  | 53.02           | 91.47         | Ind2      | 1              | Ind1         | 0.2               | 1.009           |
| 11  | 53.02           | 91.47         | Ind2      | 1              | Ind1         | 3                 | 1.591           |
| 11  | 53.02           | 91.47         | Ind2      | 1              | Ind1         | 0.1               | 1.797           |
| 11  | 53.02           | 91.47         | Ind2      | 1              | Ind1         | 0.3               | 1.714           |
| 11  | 53.02           | 91.47         | Ind2      | 1              | Ind1         | 0.5               | 0.799           |
| 11  | 53.02           | 91.47         | Ind2      | 1              | Ind1         | 0.03              | 0.572           |
| 11  | 19.86           | 79.43         | Ind2      | 10             | Ind3         | 50                | 1.476           |
| 11  | 19.86           | 79.43         | Ind2      | 10             | Ind3         | 3                 | 0.925           |
| 11  | 19.86           | 79.43         | Ind2      | 10             | Ind3         | 7                 | 1.013           |
| 11  | 19.86           | 79.43         | Ind2      | 10             | Ind3         | 30                | 1.069           |
| 11  | 19.86           | 79.43         | Ind2      | 10             | Ind3         | 10                | 0.896           |
| 11  | 19.86           | 79.43         | Ind2      | 10             | Ind3         | 5                 | 1.031           |
| 11  | 19.86           | 79.43         | Ind2      | 10             | Ind1         | 0.2               | 1.002           |
| 11  | 19.86           | 79.43         | Ind2      | 10             | Ind1         | 3                 | 1.482           |
| 11  | 19.86           | 79.43         | Ind2      | 10             | Ind1         | 0.1               | 1.455           |
| 11  | 19.86           | 79.43         | Ind2      | 10             | Ind1         | 0.3               | 1.714           |
| 11  | 19.86           | 79.43         | Ind2      | 10             | Ind1         | 0.5               | 0.611           |
| 11  | 19.86           | 79.43         | Ind2      | 10             | Ind1         | 0.03              | 0.572           |
| 11  | 19.86           | 79.43         | Ind2      | 10             | Ind1         | 0.001             | 0.463           |
| 11  | 86.08           | 110.73        | Ind2      | 10             | Ind3         | 50                | 1.665           |
| 11  | 86.08           | 110.73        | Ind2      | 10             | Ind3         | 3                 | 0.823           |
| 11  | 86.08           | 110.73        | Ind2      | 10             | Ind3         | 7                 | 1.037           |
| 11  | 86.08           | 110.73        | Ind2      | 10             | Ind3         | 30                | 0.864           |
| 11  | 86.08           | 110.73        | Ind2      | 10             | Ind3         | 10                | 1.592           |
| 11  | 86.08           | 110.73        | Ind2      | 10             | Ind3         | 5                 | 0.953           |
| 11  | 86.08           | 110.73        | Ind2      | 10             | Ind1         | 0.2               | 1.009           |
| 11  | 86.08           | 110.73        | Ind2      | 10             | Ind1         | 3                 | 1.516           |
| 11  | 86.08           | 110.73        | Ind2      | 10             | Ind1         | 0.1               | 1.797           |
| 11  | 86.08           | 110.73        | Ind2      | 10             | Ind1         | 0.3               | 1.643           |
| 11  | 86.08           | 110.73        | Ind2      | 10             | Ind1         | 0.5               | 0.799           |

Peaks Identified as Shared by the Indenoisoquinolines

| Chr | Peak Start (cM) | Peak End (cM) | Peak Drug | Peak Dose (mM) | Related Drug | Related Dose (mM) | Related Max LOD |
|-----|-----------------|---------------|-----------|----------------|--------------|-------------------|-----------------|
| 11  | 86.08           | 105.74        | Ind3      | 10             | Ind2         | 3                 | 1.064           |
| 11  | 86.08           | 105.74        | Ind3      | 10             | Ind2         | 0.16              | 0.614           |
| 11  | 86.08           | 105.74        | Ind3      | 10             | Ind2         | 1                 | 1.55            |
| 11  | 86.08           | 105.74        | Ind3      | 10             | Ind2         | 0.01              | 0.885           |
| 11  | 86.08           | 105.74        | Ind3      | 10             | Ind2         | 30                | 0.603           |
| 11  | 86.08           | 105.74        | Ind3      | 10             | Ind2         | 10                | 1.265           |
| 11  | 86.08           | 105.74        | Ind3      | 10             | Ind1         | 0.2               | 1.009           |
| 11  | 86.08           | 105.74        | Ind3      | 10             | Ind1         | 3                 | 1.516           |
| 11  | 86.08           | 105.74        | Ind3      | 10             | Ind1         | 0.1               | 1.797           |
| 11  | 86.08           | 105.74        | Ind3      | 10             | Ind1         | 0.3               | 1.643           |
| 11  | 86.08           | 105.74        | Ind3      | 10             | Ind1         | 0.5               | 0.799           |
| 11  | 98.98           | 138.56        | Ind3      | 50             | Ind2         | 3                 | 0.959           |
| 11  | 98.98           | 138.56        | Ind3      | 50             | Ind2         | 0.16              | 0.614           |
| 11  | 98.98           | 138.56        | Ind3      | 50             | Ind2         | 0.01              | 0.795           |
| 11  | 98.98           | 138.56        | Ind3      | 50             | Ind2         | 30                | 0.879           |
| 11  | 98.98           | 138.56        | Ind3      | 50             | Ind2         | 10                | 0.762           |
| 11  | 98.98           | 138.56        | Ind3      | 50             | Ind1         | 0.2               | 0.864           |
| 11  | 98.98           | 138.56        | Ind3      | 50             | Ind1         | 0.1               | 1.336           |
| 11  | 98.98           | 138.56        | Ind3      | 50             | Ind1         | 0.3               | 1.306           |
| 12  | 123.33          | 144.83        | Ind3      | 1              | Ind2         | 0.16              | 0.513           |
| 12  | 123.33          | 144.83        | Ind3      | 1              | Ind2         | 1                 | 0.511           |
| 12  | 123.33          | 144.83        | Ind3      | 1              | Ind2         | 0.23              | 0.828           |
| 13  | 76.26           | 93.52         | Ind1      | 0.1            | Ind3         | 7                 | 1.013           |
| 13  | 76.26           | 93.52         | Ind1      | 0.1            | Ind3         | 30                | 0.899           |
| 13  | 76.26           | 93.52         | Ind1      | 0.1            | Ind3         | 10                | 1.44            |
| 13  | 76.26           | 93.52         | Ind1      | 0.1            | Ind2         | 0.16              | 0.982           |
| 13  | 76.26           | 93.52         | Ind1      | 0.1            | Ind2         | 30                | 1.191           |
| 13  | 76.26           | 93.52         | Ind1      | 0.1            | Ind2         | 10                | 1.019           |
| 13  | 75.19           | 93.52         | Ind2      | 10             | Ind3         | 7                 | 1.013           |
| 13  | 75.19           | 93.52         | Ind2      | 10             | Ind3         | 30                | 0.899           |
| 13  | 75.19           | 93.52         | Ind2      | 10             | Ind3         | 10                | 1.44            |
| 13  | 75.19           | 93.52         | Ind2      | 10             | Ind1         | 0.1               | 1.21            |
| 13  | 75.19           | 93.52         | Ind2      | 10             | Ind1         | 0.3               | 0.625           |
| 13  | 75.19           | 93.52         | Ind2      | 10             | Ind1         | 0.5               | 0.66            |
| 13  | 75.19           | 93.52         | Ind2      | 10             | Ind1         | 0.03              | 0.524           |
| 13  | 67.12           | 114.98        | Ind2      | 30             | Ind3         | 50                | 0.525           |
| 13  | 67.12           | 114.98        | Ind2      | 30             | Ind3         | 0.01              | 0.413           |
| 13  | 67.12           | 114.98        | Ind2      | 30             | Ind3         | 7                 | 1.013           |
| 13  | 67.12           | 114.98        | Ind2      | 30             | Ind3         | 30                | 0.899           |
| 13  | 67.12           | 114.98        | Ind2      | 30             | Ind3         | 10                | 1.44            |
| 13  | 67.12           | 114.98        | Ind2      | 30             | Ind1         | 0.1               | 1.21            |
| 13  | 67.12           | 114.98        | Ind2      | 30             | Ind1         | 0.3               | 0.625           |
| 13  | 67.12           | 114.98        | Ind2      | 30             | Ind1         | 0.5               | 0.66            |
| 13  | 67.12           | 114.98        | Ind2      | 30             | Ind1         | 0.03              | 0.524           |
| 13  | 77.47           | 114.98        | Ind3      | 10             | Ind2         | 0.16              | 0.982           |
| 13  | 77.47           | 114.98        | Ind3      | 10             | Ind2         | 30                | 1.191           |
| 13  | 77.47           | 114.98        | Ind3      | 10             | Ind2         | 10                | 1.019           |

Peaks Identified as Shared by the Indenoisoquinolines

| Chr | Peak Start (cM) | Peak End (cM) | Peak Drug | Peak Dose (mM) | Related Drug | Related Dose (mM) | Related Max LOD |
|-----|-----------------|---------------|-----------|----------------|--------------|-------------------|-----------------|
| 13  | 77.47           | 114.98        | Ind3      | 10             | Ind1         | 0.1               | 1.21            |
| 13  | 77.47           | 114.98        | Ind3      | 10             | Ind1         | 0.3               | 0.625           |
| 13  | 77.47           | 114.98        | Ind3      | 10             | Ind1         | 0.5               | 0.66            |
| 13  | 77.47           | 114.98        | Ind3      | 10             | Ind1         | 0.03              | 0.524           |
| 13  | 68.44           | 102.73        | Ind3      | 30             | Ind2         | 0.16              | 0.982           |
| 13  | 68.44           | 102.73        | Ind3      | 30             | Ind2         | 0.01              | 0.416           |
| 13  | 68.44           | 102.73        | Ind3      | 30             | Ind2         | 30                | 1.191           |
| 13  | 68.44           | 102.73        | Ind3      | 30             | Ind2         | 0.23              | 0.407           |
| 13  | 68.44           | 102.73        | Ind3      | 30             | Ind2         | 10                | 1.019           |
| 13  | 68.44           | 102.73        | Ind3      | 30             | Ind1         | 0.1               | 1.21            |
| 13  | 68.44           | 102.73        | Ind3      | 30             | Ind1         | 0.3               | 0.625           |
| 13  | 68.44           | 102.73        | Ind3      | 30             | Ind1         | 0.5               | 0.66            |
| 13  | 68.44           | 102.73        | Ind3      | 30             | Ind1         | 0.03              | 0.524           |
| 14  | 0               | 21.51         | Ind1      | 0.5            | Ind3         | 50                | 0.701           |
| 14  | 0               | 21.51         | Ind1      | 0.5            | Ind3         | 7                 | 0.663           |
| 14  | 0               | 21.51         | Ind1      | 0.5            | Ind3         | 30                | 0.642           |
| 14  | 0               | 21.51         | Ind1      | 0.5            | Ind2         | 0.01              | 0.628           |
| 14  | 0               | 21.51         | Ind1      | 0.5            | Ind2         | 30                | 0.67            |
| 14  | 99.88           | 125.88        | Ind1      | 3              | Ind3         | 3                 | 0.579           |
| 14  | 99.88           | 125.88        | Ind1      | 3              | Ind3         | 7                 | 0.653           |
| 14  | 99.88           | 125.88        | Ind1      | 3              | Ind3         | 10                | 0.906           |
| 14  | 99.88           | 125.88        | Ind1      | 3              | Ind3         | 5                 | 2.022           |
| 14  | 99.88           | 125.88        | Ind1      | 3              | Ind2         | 3                 | 0.448           |
| 14  | 98.96           | 134.3         | Ind3      | 5              | Ind2         | 3                 | 0.448           |
| 14  | 98.96           | 134.3         | Ind3      | 5              | Ind1         | 3                 | 1.447           |
| 16  | 65.1            | 104.45        | Ind1      | 0.1            | Ind3         | 50                | 1.14            |
| 16  | 65.1            | 104.45        | Ind1      | 0.1            | Ind3         | 3                 | 0.723           |
| 16  | 65.1            | 104.45        | Ind1      | 0.1            | Ind3         | 7                 | 0.572           |
| 16  | 65.1            | 104.45        | Ind1      | 0.1            | Ind3         | 30                | 0.93            |
| 16  | 65.1            | 104.45        | Ind1      | 0.1            | Ind3         | 10                | 1.228           |
| 16  | 65.1            | 104.45        | Ind1      | 0.1            | Ind2         | 3                 | 2.139           |
| 16  | 65.1            | 104.45        | Ind1      | 0.1            | Ind2         | 0.01              | 0.421           |
| 16  | 65.1            | 104.45        | Ind1      | 0.1            | Ind2         | 30                | 1.026           |
| 16  | 65.1            | 104.45        | Ind1      | 0.1            | Ind2         | 10                | 0.871           |
| 16  | 15.32           | 108.32        | Ind1      | 0.2            | Ind3         | 50                | 1.14            |
| 16  | 15.32           | 108.32        | Ind1      | 0.2            | Ind3         | 1                 | 1.097           |
| 16  | 15.32           | 108.32        | Ind1      | 0.2            | Ind3         | 3                 | 0.723           |
| 16  | 15.32           | 108.32        | Ind1      | 0.2            | Ind3         | 7                 | 0.822           |
| 16  | 15.32           | 108.32        | Ind1      | 0.2            | Ind3         | 30                | 0.977           |
| 16  | 15.32           | 108.32        | Ind1      | 0.2            | Ind3         | 10                | 1.228           |
| 16  | 15.32           | 108.32        | Ind1      | 0.2            | Ind2         | 3                 | 2.139           |
| 16  | 15.32           | 108.32        | Ind1      | 0.2            | Ind2         | 0.16              | 0.542           |
| 16  | 15.32           | 108.32        | Ind1      | 0.2            | Ind2         | 0.01              | 0.748           |
| 16  | 15.32           | 108.32        | Ind1      | 0.2            | Ind2         | 30                | 1.026           |
| 16  | 15.32           | 108.32        | Ind1      | 0.2            | Ind2         | 0.23              | 0.518           |
| 16  | 15.32           | 108.32        | Ind1      | 0.2            | Ind2         | 10                | 0.959           |
| 16  | 59.68           | 108.32        | Ind1      | 0.3            | Ind3         | 50                | 1.14            |

Peaks Identified as Shared by the Indenoisoquinolines

| Chr | Peak Start (cM) | Peak End (cM) | Peak Drug | Peak Dose (mM) | Related Drug | Related Dose (mM) | Related Max LOD |
|-----|-----------------|---------------|-----------|----------------|--------------|-------------------|-----------------|
| 16  | 59.68           | 108.32        | Ind1      | 0.3            | Ind3         | 3                 | 0.723           |
| 16  | 59.68           | 108.32        | Ind1      | 0.3            | Ind3         | 7                 | 0.572           |
| 16  | 59.68           | 108.32        | Ind1      | 0.3            | Ind3         | 30                | 0.93            |
| 16  | 59.68           | 108.32        | Ind1      | 0.3            | Ind3         | 10                | 1.228           |
| 16  | 59.68           | 108.32        | Ind1      | 0.3            | Ind2         | 3                 | 2.139           |
| 16  | 59.68           | 108.32        | Ind1      | 0.3            | Ind2         | 0.01              | 0.48            |
| 16  | 59.68           | 108.32        | Ind1      | 0.3            | Ind2         | 30                | 1.026           |
| 16  | 59.68           | 108.32        | Ind1      | 0.3            | Ind2         | 10                | 0.871           |
| 16  | 1.08            | 29.97         | Ind1      | 0.5            | Ind3         | 50                | 0.748           |
| 16  | 1.08            | 29.97         | Ind1      | 0.5            | Ind3         | 1                 | 0.914           |
| 16  | 1.08            | 29.97         | Ind1      | 0.5            | Ind3         | 7                 | 0.822           |
| 16  | 1.08            | 29.97         | Ind1      | 0.5            | Ind3         | 30                | 0.977           |
| 16  | 1.08            | 29.97         | Ind1      | 0.5            | Ind3         | 10                | 0.857           |
| 16  | 1.08            | 29.97         | Ind1      | 0.5            | Ind2         | 3                 | 0.501           |
| 16  | 1.08            | 29.97         | Ind1      | 0.5            | Ind2         | 0.16              | 0.542           |
| 16  | 1.08            | 29.97         | Ind1      | 0.5            | Ind2         | 0.01              | 0.748           |
| 16  | 1.08            | 29.97         | Ind1      | 0.5            | Ind2         | 30                | 0.578           |
| 16  | 1.08            | 29.97         | Ind1      | 0.5            | Ind2         | 0.23              | 0.518           |
| 16  | 1.08            | 29.97         | Ind1      | 0.5            | Ind2         | 10                | 0.959           |
| 16  | 35.44           | 99.44         | Ind2      | 3              | Ind3         | 50                | 1.14            |
| 16  | 35.44           | 99.44         | Ind2      | 3              | Ind3         | 1                 | 1.097           |
| 16  | 35.44           | 99.44         | Ind2      | 3              | Ind3         | 3                 | 0.723           |
| 16  | 35.44           | 99.44         | Ind2      | 3              | Ind3         | 7                 | 0.572           |
| 16  | 35.44           | 99.44         | Ind2      | 3              | Ind3         | 30                | 0.93            |
| 16  | 35.44           | 99.44         | Ind2      | 3              | Ind3         | 10                | 1.228           |
| 16  | 35.44           | 99.44         | Ind2      | 3              | Ind1         | 0.2               | 1.721           |
| 16  | 35.44           | 99.44         | Ind2      | 3              | Ind1         | 3                 | 0.444           |
| 16  | 35.44           | 99.44         | Ind2      | 3              | Ind1         | 0.1               | 1.474           |
| 16  | 35.44           | 99.44         | Ind2      | 3              | Ind1         | 0.3               | 1.198           |
| 16  | 35.44           | 99.44         | Ind2      | 3              | Ind1         | 0.05              | 1.515           |
| 16  | 35.44           | 99.44         | Ind2      | 3              | Ind1         | 0.5               | 0.652           |
| 16  | 35.44           | 99.44         | Ind2      | 3              | Ind1         | 0.03              | 1.251           |
| 16  | 35.44           | 99.44         | Ind2      | 3              | Ind1         | 0.001             | 0.463           |
| 16  | 11.46           | 34.22         | Ind2      | 10             | Ind3         | 50                | 0.748           |
| 16  | 11.46           | 34.22         | Ind2      | 10             | Ind3         | 1                 | 0.932           |
| 16  | 11.46           | 34.22         | Ind2      | 10             | Ind3         | 7                 | 0.822           |
| 16  | 11.46           | 34.22         | Ind2      | 10             | Ind3         | 30                | 0.977           |
| 16  | 11.46           | 34.22         | Ind2      | 10             | Ind3         | 10                | 0.857           |
| 16  | 11.46           | 34.22         | Ind2      | 10             | Ind1         | 0.2               | 0.965           |
| 16  | 11.46           | 34.22         | Ind2      | 10             | Ind1         | 3                 | 0.603           |
| 16  | 11.46           | 34.22         | Ind2      | 10             | Ind1         | 0.1               | 0.442           |
| 16  | 11.46           | 34.22         | Ind2      | 10             | Ind1         | 0.3               | 0.766           |
| 16  | 11.46           | 34.22         | Ind2      | 10             | Ind1         | 0.05              | 1.426           |
| 16  | 11.46           | 34.22         | Ind2      | 10             | Ind1         | 0.5               | 1.201           |
| 16  | 27.05           | 59.68         | Ind3      | 1              | Ind2         | 3                 | 1.333           |
| 16  | 27.05           | 59.68         | Ind3      | 1              | Ind2         | 30                | 0.578           |
| 16  | 27.05           | 59.68         | Ind3      | 1              | Ind2         | 0.23              | 0.518           |



Peaks Identified as Shared by the Indenoisoquinolines

| Chr | Peak Start (cM) | Peak End (cM) | Peak Drug | Peak Dose (mM) | Related Drug | Related Dose (mM) | Related Max LOD |
|-----|-----------------|---------------|-----------|----------------|--------------|-------------------|-----------------|
| 16  | 27.05           | 59.68         | Ind3      | 1              | Ind2         | 10                | 0.747           |
| 16  | 27.05           | 59.68         | Ind3      | 1              | Ind1         | 0.2               | 1.25            |
| 16  | 27.05           | 59.68         | Ind3      | 1              | Ind1         | 3                 | 0.444           |
| 16  | 27.05           | 59.68         | Ind3      | 1              | Ind1         | 0.1               | 0.442           |
| 16  | 27.05           | 59.68         | Ind3      | 1              | Ind1         | 0.3               | 0.766           |
| 16  | 27.05           | 59.68         | Ind3      | 1              | Ind1         | 0.05              | 1.515           |
| 16  | 27.05           | 59.68         | Ind3      | 1              | Ind1         | 0.5               | 0.565           |
| 16  | 27.05           | 59.68         | Ind3      | 1              | Ind1         | 0.001             | 0.463           |
| 16  | 69.05           | 104.45        | Ind3      | 10             | Ind2         | 3                 | 2.139           |
| 16  | 69.05           | 104.45        | Ind3      | 10             | Ind2         | 0.01              | 0.421           |
| 16  | 69.05           | 104.45        | Ind3      | 10             | Ind2         | 30                | 1.026           |
| 16  | 69.05           | 104.45        | Ind3      | 10             | Ind2         | 10                | 0.871           |
| 16  | 69.05           | 104.45        | Ind3      | 10             | Ind1         | 0.2               | 1.721           |
| 16  | 69.05           | 104.45        | Ind3      | 10             | Ind1         | 0.1               | 1.474           |
| 16  | 69.05           | 104.45        | Ind3      | 10             | Ind1         | 0.3               | 1.198           |
| 16  | 69.05           | 104.45        | Ind3      | 10             | Ind1         | 0.05              | 0.671           |
| 16  | 69.05           | 104.45        | Ind3      | 10             | Ind1         | 0.5               | 0.652           |
| 16  | 69.05           | 104.45        | Ind3      | 10             | Ind1         | 0.03              | 1.251           |
| 16  | 15.32           | 42.81         | Ind3      | 30             | Ind2         | 3                 | 0.759           |
| 16  | 15.32           | 42.81         | Ind3      | 30             | Ind2         | 0.16              | 0.542           |
| 16  | 15.32           | 42.81         | Ind3      | 30             | Ind2         | 0.01              | 0.748           |
| 16  | 15.32           | 42.81         | Ind3      | 30             | Ind2         | 30                | 0.578           |
| 16  | 15.32           | 42.81         | Ind3      | 30             | Ind2         | 0.23              | 0.518           |
| 16  | 15.32           | 42.81         | Ind3      | 30             | Ind2         | 10                | 0.959           |
| 16  | 15.32           | 42.81         | Ind3      | 30             | Ind1         | 0.2               | 0.965           |
| 16  | 15.32           | 42.81         | Ind3      | 30             | Ind1         | 3                 | 0.563           |
| 16  | 15.32           | 42.81         | Ind3      | 30             | Ind1         | 0.1               | 0.442           |
| 16  | 15.32           | 42.81         | Ind3      | 30             | Ind1         | 0.3               | 0.766           |
| 16  | 15.32           | 42.81         | Ind3      | 30             | Ind1         | 0.05              | 1.426           |
| 16  | 15.32           | 42.81         | Ind3      | 30             | Ind1         | 0.5               | 1.145           |
| 16  | 50.6            | 99.44         | Ind3      | 30             | Ind2         | 3                 | 2.139           |
| 16  | 50.6            | 99.44         | Ind3      | 30             | Ind2         | 30                | 1.026           |
| 16  | 50.6            | 99.44         | Ind3      | 30             | Ind2         | 0.23              | 0.425           |
| 16  | 50.6            | 99.44         | Ind3      | 30             | Ind2         | 10                | 0.871           |
| 16  | 50.6            | 99.44         | Ind3      | 30             | Ind1         | 0.2               | 1.721           |
| 16  | 50.6            | 99.44         | Ind3      | 30             | Ind1         | 3                 | 0.444           |
| 16  | 50.6            | 99.44         | Ind3      | 30             | Ind1         | 0.1               | 1.474           |
| 16  | 50.6            | 99.44         | Ind3      | 30             | Ind1         | 0.3               | 1.198           |
| 16  | 50.6            | 99.44         | Ind3      | 30             | Ind1         | 0.05              | 1.464           |
| 16  | 50.6            | 99.44         | Ind3      | 30             | Ind1         | 0.5               | 0.652           |
| 16  | 50.6            | 99.44         | Ind3      | 30             | Ind1         | 0.03              | 1.251           |
| 16  | 50.6            | 99.44         | Ind3      | 30             | Ind1         | 0.001             | 0.463           |
| 18  | 90.6            | 96.48         | Ind1      | 0.03           | Ind3         | 3                 | 0.494           |
| 18  | 90.6            | 96.48         | Ind1      | 0.03           | Ind2         | 0.16              | 0.631           |
| 18  | 90.6            | 96.48         | Ind1      | 0.03           | Ind2         | 1                 | 1.02            |
| 18  | 90.6            | 96.48         | Ind1      | 0.03           | Ind2         | 0.5               | 0.446           |
| 18  | 0               | 31.17         | Ind1      | 0.2            | Ind3         | 50                | 0.814           |

Peaks Identified as Shared by the Indenoisoquinolines

| Chr | Peak Start (cM) | Peak End (cM) | Peak Drug | Peak Dose (mM) | Related Drug | Related Dose (mM) | Related Max LOD |
|-----|-----------------|---------------|-----------|----------------|--------------|-------------------|-----------------|
| 18  | 0               | 31.17         | Ind1      | 0.2            | Ind3         | 1                 | 0.531           |
| 18  | 0               | 31.17         | Ind1      | 0.2            | Ind3         | 30                | 0.81            |
| 18  | 0               | 31.17         | Ind1      | 0.2            | Ind3         | 10                | 0.719           |
| 18  | 0               | 31.17         | Ind1      | 0.2            | Ind2         | 3                 | 0.505           |
| 18  | 0               | 31.17         | Ind1      | 0.2            | Ind2         | 0.16              | 0.612           |
| 18  | 0               | 31.17         | Ind1      | 0.2            | Ind2         | 1                 | 0.584           |
| 18  | 0               | 31.17         | Ind1      | 0.2            | Ind2         | 30                | 0.884           |
| 18  | 0               | 31.17         | Ind1      | 0.2            | Ind2         | 0.5               | 1.049           |
| 18  | 0               | 31.17         | Ind1      | 0.2            | Ind2         | 10                | 0.535           |
| 19  | 52.59           | 77.54         | Ind1      | 0.1            | Ind3         | 0.01              | 0.736           |
| 19  | 52.59           | 77.54         | Ind1      | 0.1            | Ind3         | 7                 | 1.384           |
| 19  | 52.59           | 77.54         | Ind1      | 0.1            | Ind3         | 10                | 0.741           |
| 19  | 52.59           | 77.54         | Ind1      | 0.1            | Ind2         | 3                 | 0.989           |
| 19  | 52.59           | 77.54         | Ind1      | 0.1            | Ind2         | 0.01              | 0.55            |
| 19  | 52.59           | 77.54         | Ind1      | 0.1            | Ind2         | 30                | 0.437           |
| 19  | 52.59           | 77.54         | Ind1      | 0.1            | Ind2         | 0.23              | 0.641           |
| 19  | 52.59           | 77.54         | Ind1      | 0.1            | Ind2         | 10                | 0.441           |
| 21  | 31.26           | 57.77         | Ind1      | 0.03           | Ind3         | 7                 | 0.564           |
| 21  | 31.26           | 57.77         | Ind1      | 0.03           | Ind3         | 5                 | 0.426           |
| 21  | 31.26           | 57.77         | Ind1      | 0.03           | Ind2         | 0.16              | 0.491           |
| 21  | 31.26           | 57.77         | Ind1      | 0.03           | Ind2         | 0.23              | 0.579           |
| 21  | 28.48           | 51.49         | Ind2      | 0.23           | Ind3         | 7                 | 0.424           |
| 21  | 28.48           | 51.49         | Ind2      | 0.23           | Ind3         | 5                 | 0.426           |
| 21  | 28.48           | 51.49         | Ind2      | 0.23           | Ind1         | 0.03              | 0.778           |
