# Supplementary material
Source: PubMed Central journal article supplement (PMC3191307)
Supplement: NIHMS311160-supplement-2.pdf [file NIHMS311160-supplement-2.pdf]

Supplemental Table 1. Camptothecin and Indenoisoquinoline analogues.

| Camptothecins                                                                     |                               |                                           |                                                                                     |                | Indenoisoquinolines                                                                 |                                                                                                                                          |
|-----------------------------------------------------------------------------------|-------------------------------|-------------------------------------------|-------------------------------------------------------------------------------------|----------------|-------------------------------------------------------------------------------------|------------------------------------------------------------------------------------------------------------------------------------------|
| 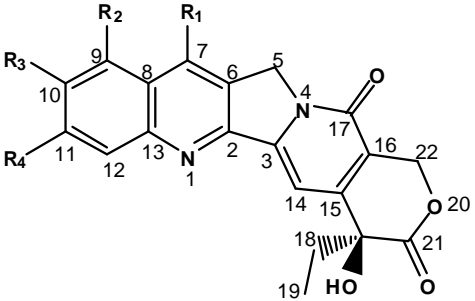 |                               |                                           |                                                                                     |                |  |                                                                                                                                          |
| Name                                                                              | R <sub>1</sub>                | R <sub>2</sub>                            | R <sub>3</sub>                                                                      | R <sub>4</sub> | Name                                                                                | R                                                                                                                                        |
| Camptothecin (CPT)                                                                | H                             | H                                         | H                                                                                   | H              | NSC 706744 (Ind 1)                                                                  | —CH <sub>2</sub> CH <sub>2</sub> CH <sub>2</sub> NHCH <sub>2</sub> CH <sub>2</sub> OH                                                    |
| Topotecan (TPT)                                                                   | H                             | CH <sub>2</sub> NH(CH <sub>3</sub> )<br>2 | OH                                                                                  | H              | NSC 725776 (Ind2)                                                                   | —CH <sub>2</sub> CH <sub>2</sub> CH <sub>2</sub><br>  |
| Irinotecan (CPT11)                                                                | C <sub>2</sub> H <sub>5</sub> | H                                         |  | H              | NSC 724998 (Ind3)                                                                   | —CH <sub>2</sub> CH <sub>2</sub> CH <sub>2</sub><br> |
| SN38                                                                              | C <sub>2</sub> H <sub>5</sub> | H                                         | OH                                                                                  | H              |                                                                                     |                                                                                                                                          |
| 9-aminocamptothecin (9AC)                                                         | H                             | NH <sub>2</sub>                           | H                                                                                   | H              |                                                                                     |                                                                                                                                          |
| 9-nitrocamptothecin (9NC)                                                         | H                             | NO <sub>2</sub>                           | H                                                                                   | H              |                                                                                     |                                                                                                                                          |

Supplemental Table 2. Results of correlation analysis for cell viability at GI50 for camptothecins and indenoisoquinolines

| PCC   | Ind1 | Ind2 | Ind3 | 9AC   | 9NC   | CPT   | CPT11 | SN38  | TPT   |
|-------|------|------|------|-------|-------|-------|-------|-------|-------|
| Ind1  | 1    | 0.88 | 0.84 | -0.14 | -0.14 | -0.12 | -0.15 | -0.17 | -0.14 |
| Ind2  |      | 1    | 0.82 | -0.11 | -0.09 | -0.10 | -0.13 | -0.14 | -0.10 |
| Ind3  |      |      | 1    | -0.09 | -0.05 | -0.06 | -0.11 | -0.15 | -0.10 |
| 9AC   |      |      |      | 1     | 0.65  | 0.65  | 0.65  | 0.65  | 0.65  |
| 9NC   |      |      |      |       | 1     | 0.77  | 0.76  | 0.73  | 0.78  |
| CPT   |      |      |      |       |       |       | 0.94  | 0.88  | 0.86  |
| CPT11 |      |      |      |       |       |       | 1     | 0.91  | 0.86  |
| SN38  |      |      |      |       |       |       |       | 1     | 0.85  |
| TPT   |      |      |      |       |       |       |       |       | 1     |

Pearson Correlation Coefficient, (PCC)
